# Supplementary figures and images for: Differential Alternative Splicing Genes and Isoform Regulation Networks of Rapeseed (Brassica napus L.) Infected with Sclerotinia sclerotiorum
Source: MDPI journal article supplement (doi:10.3390/genes11070784), 2020-07-13

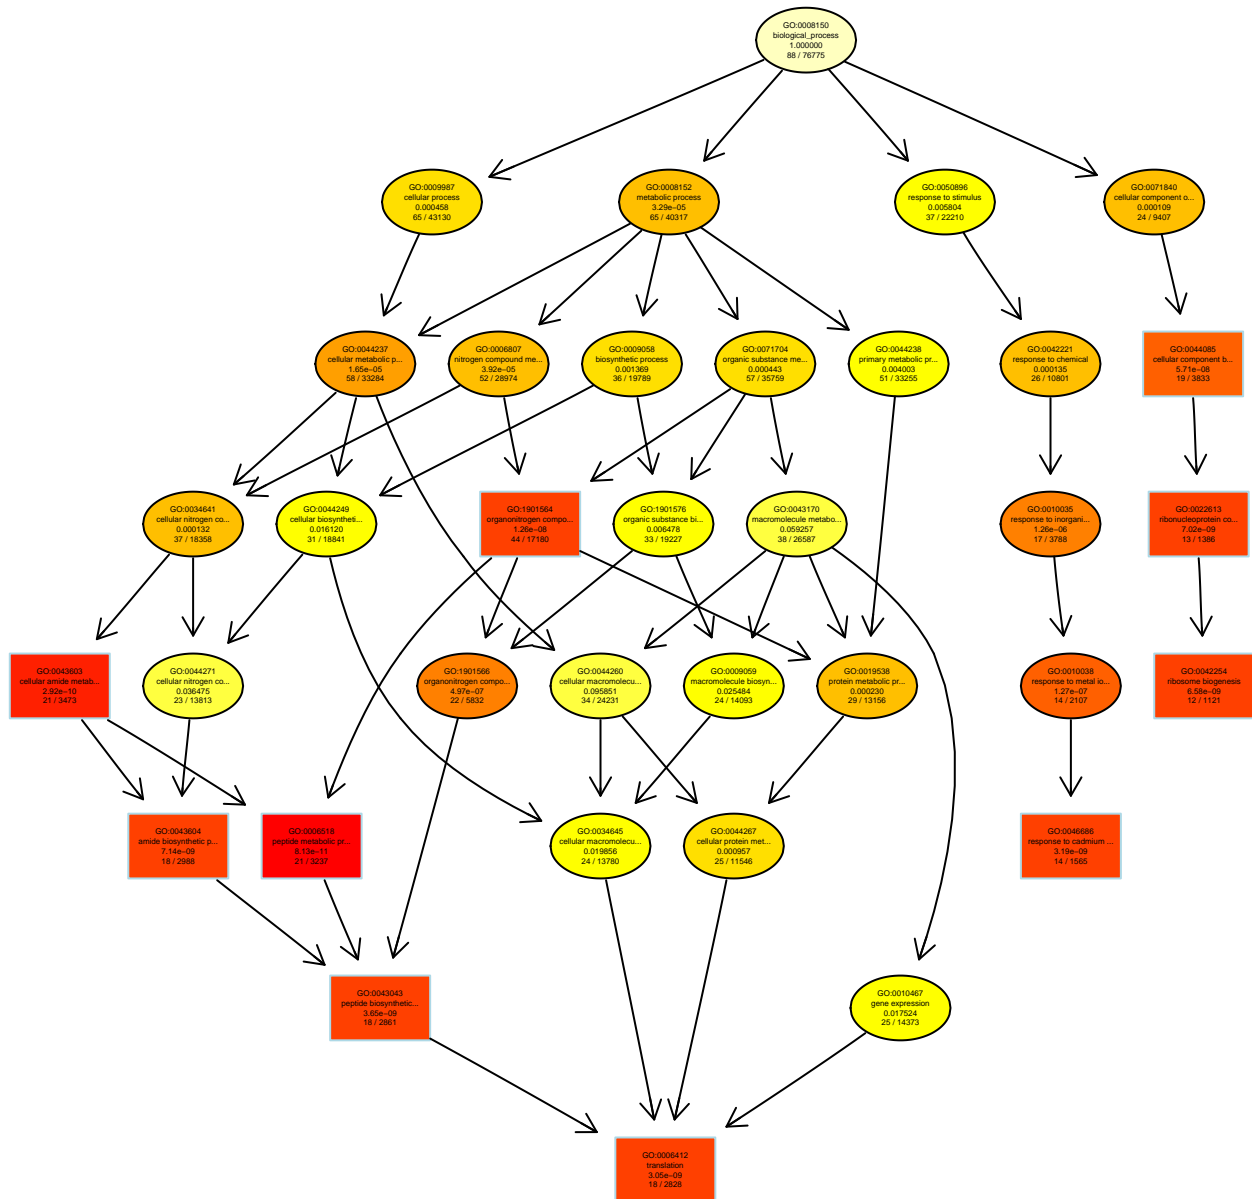

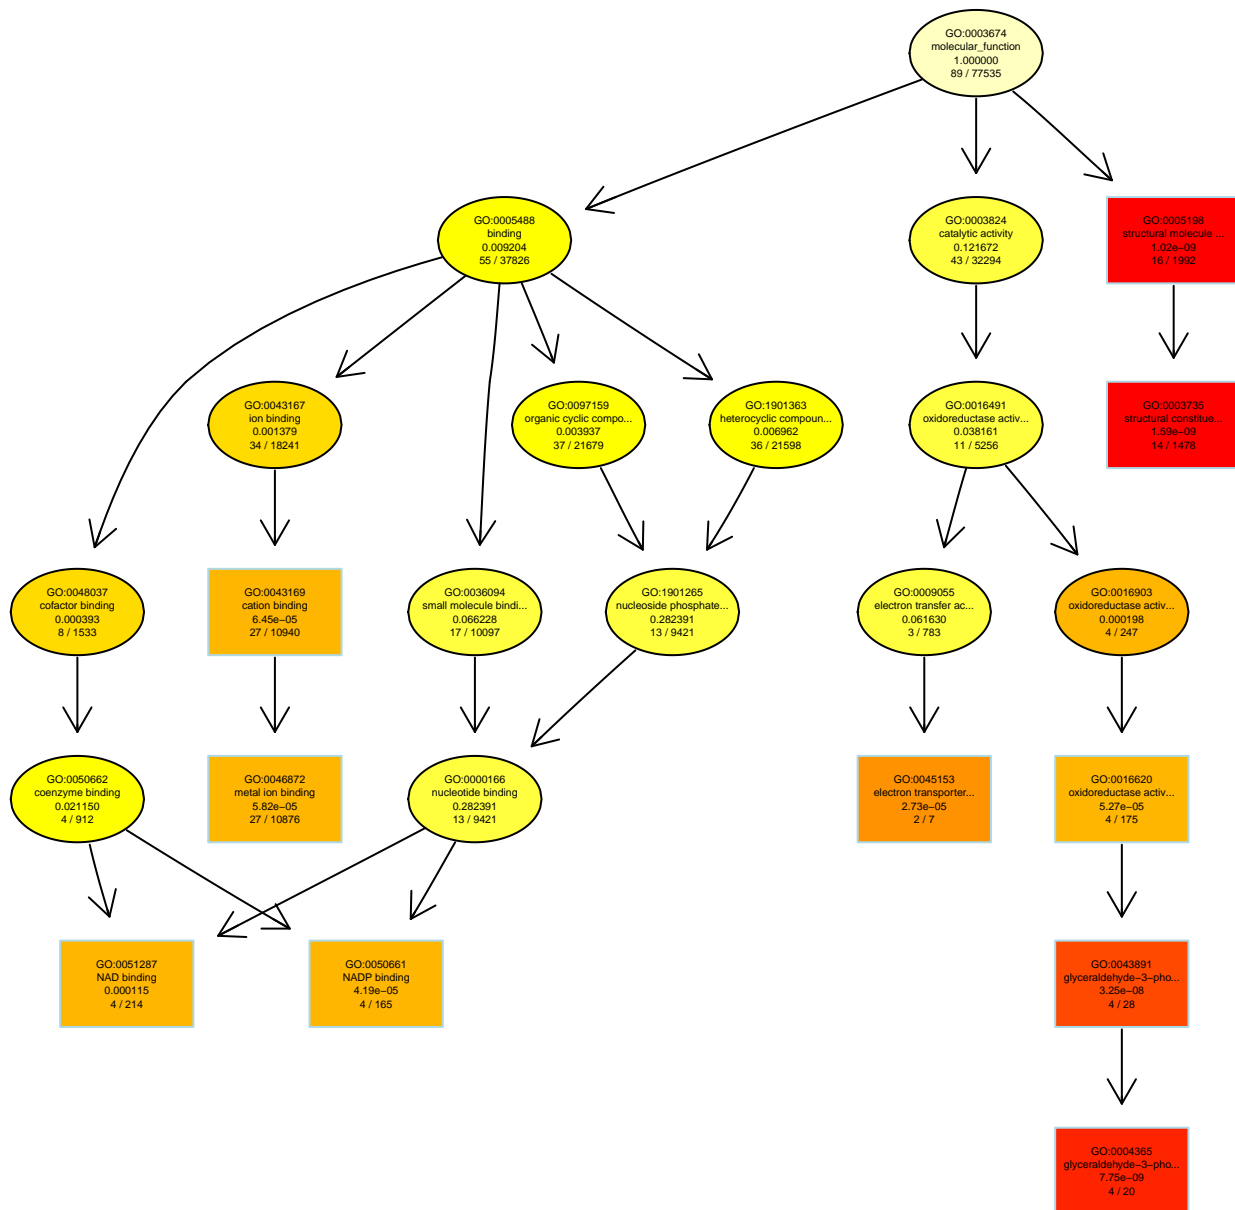

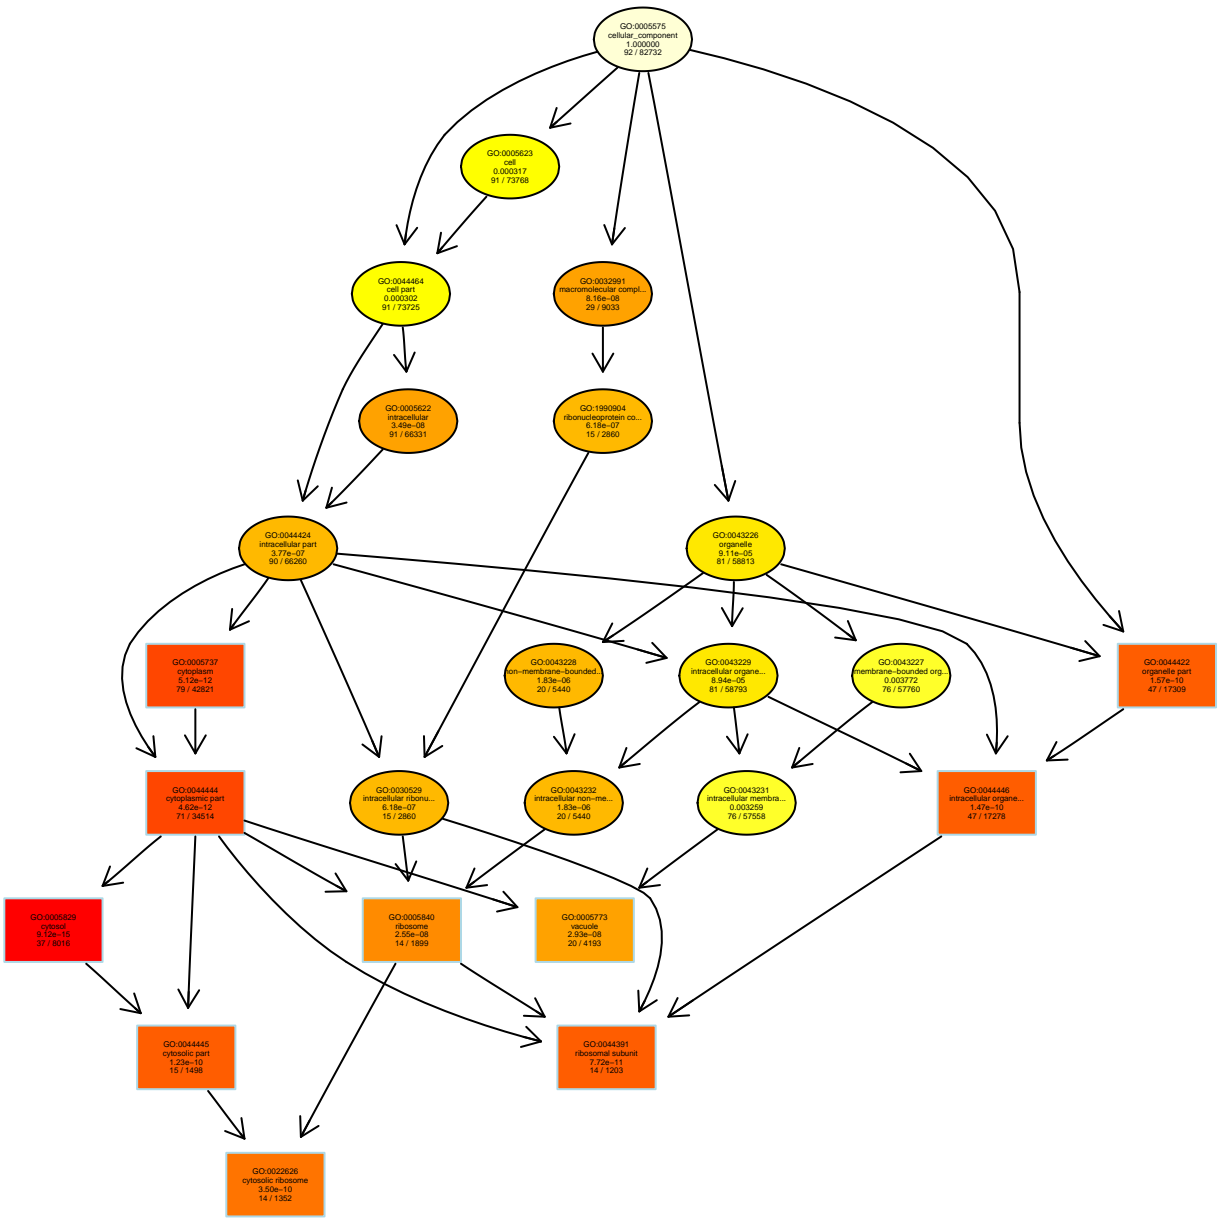

Supplement: s1 [file s1]

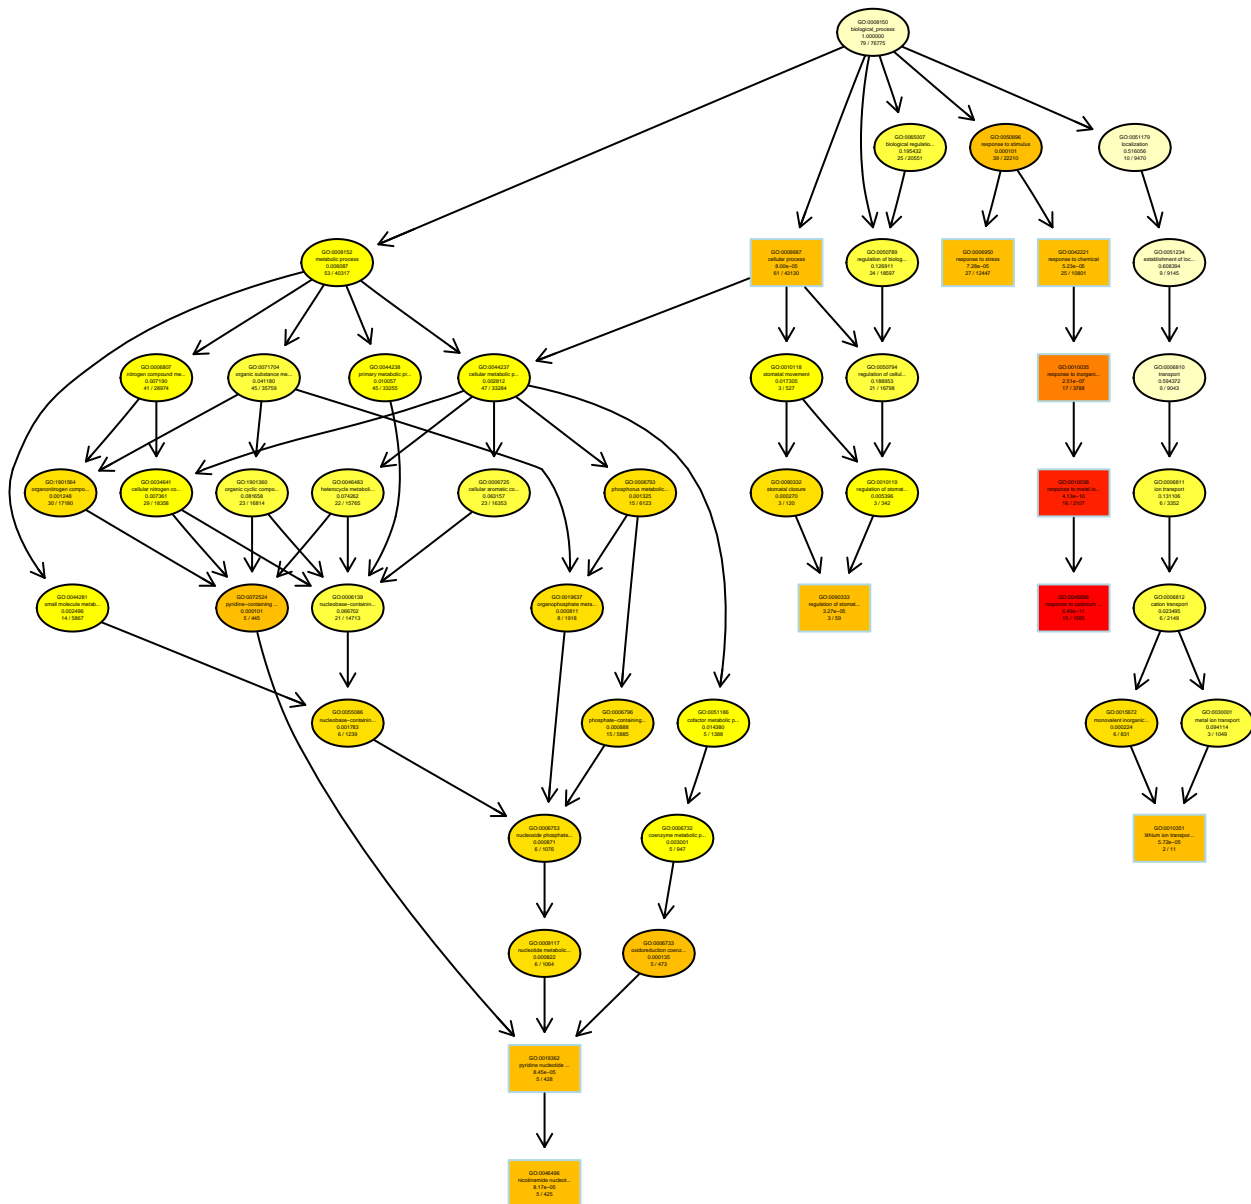

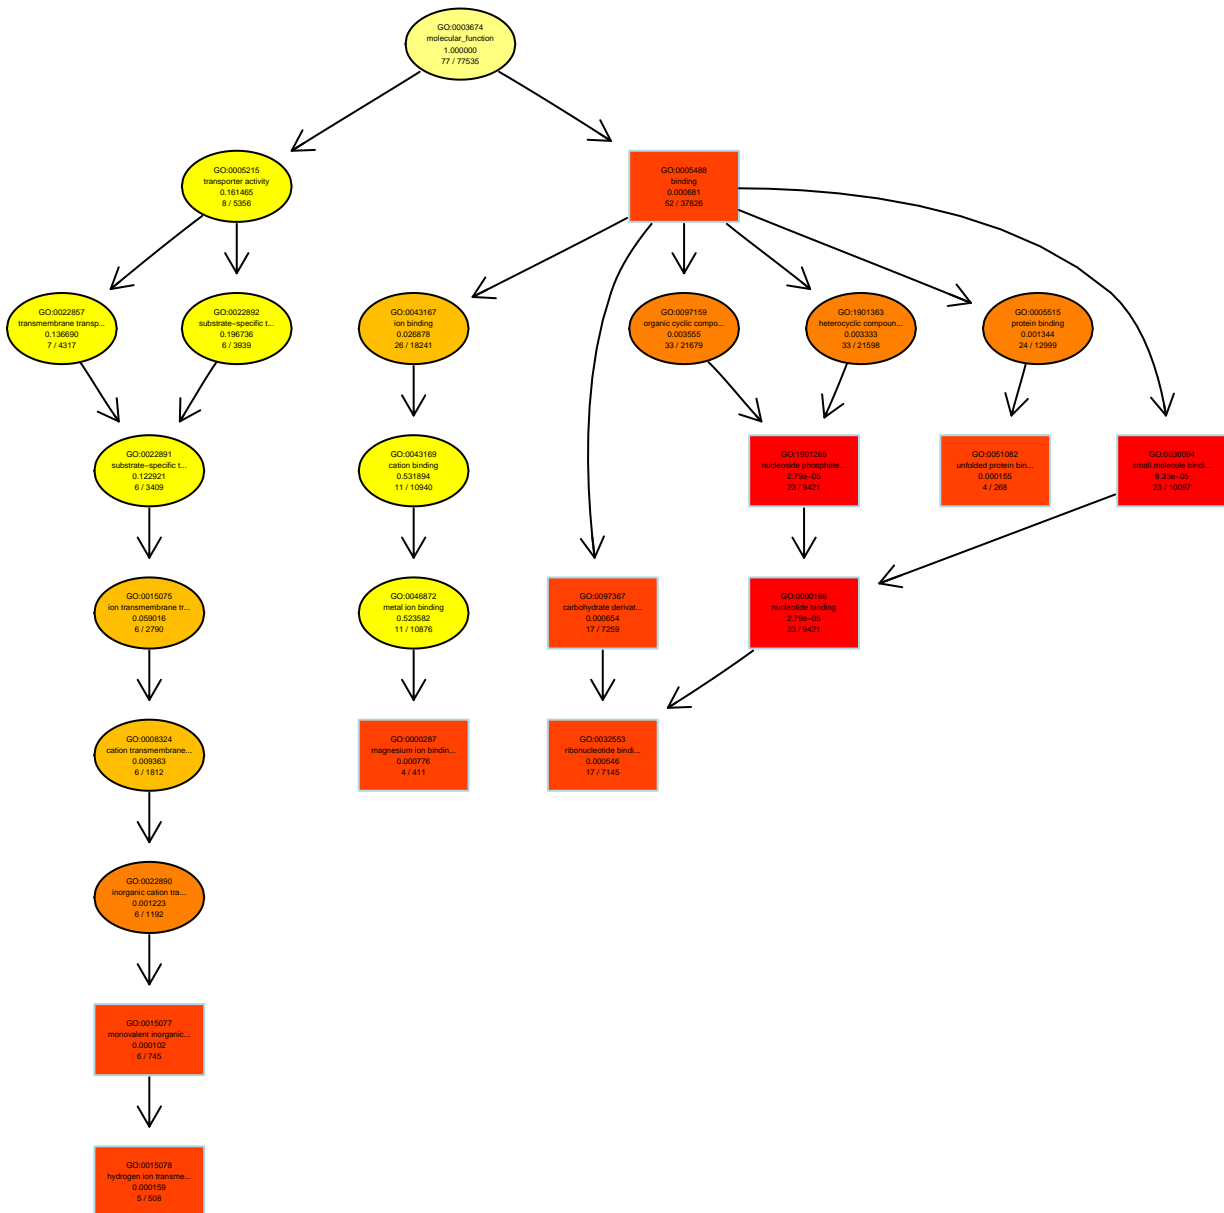

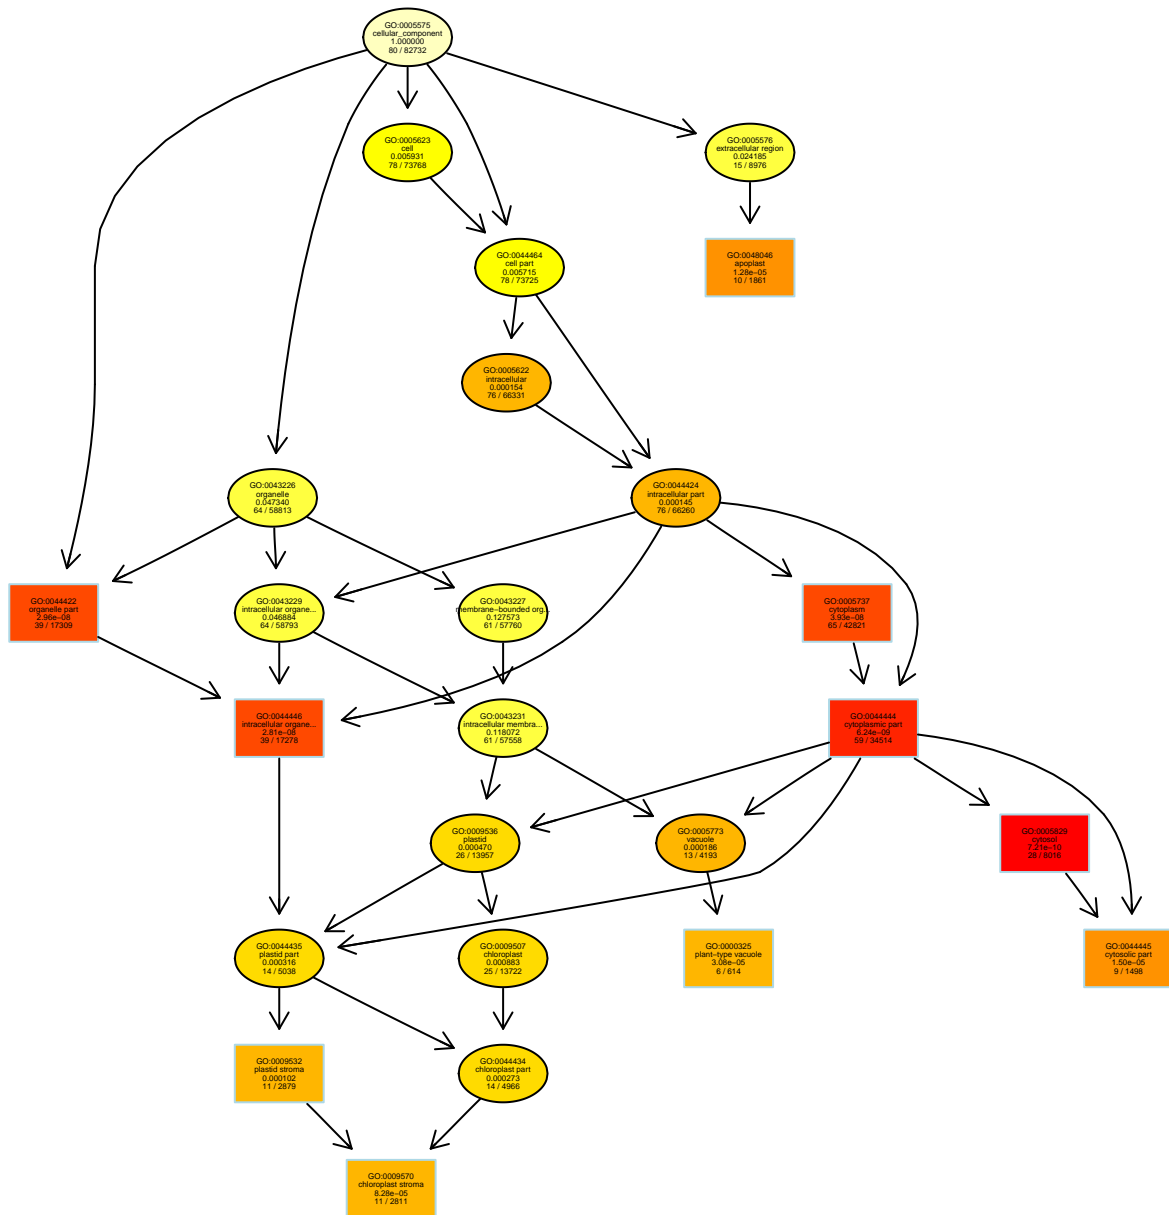

Supplement: s1 [file s1]

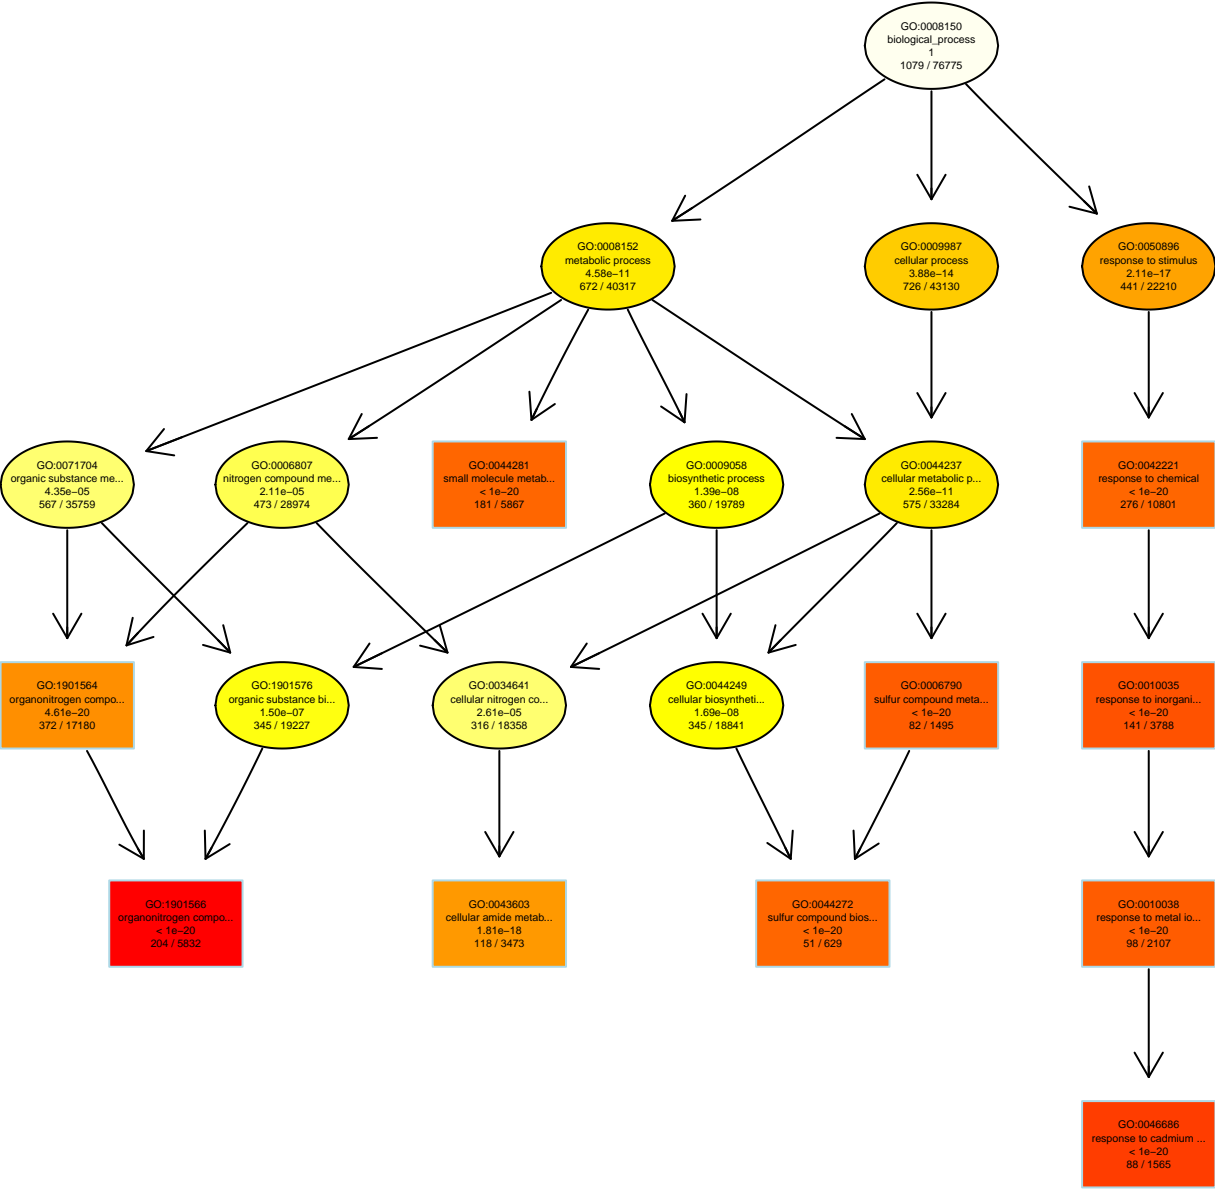

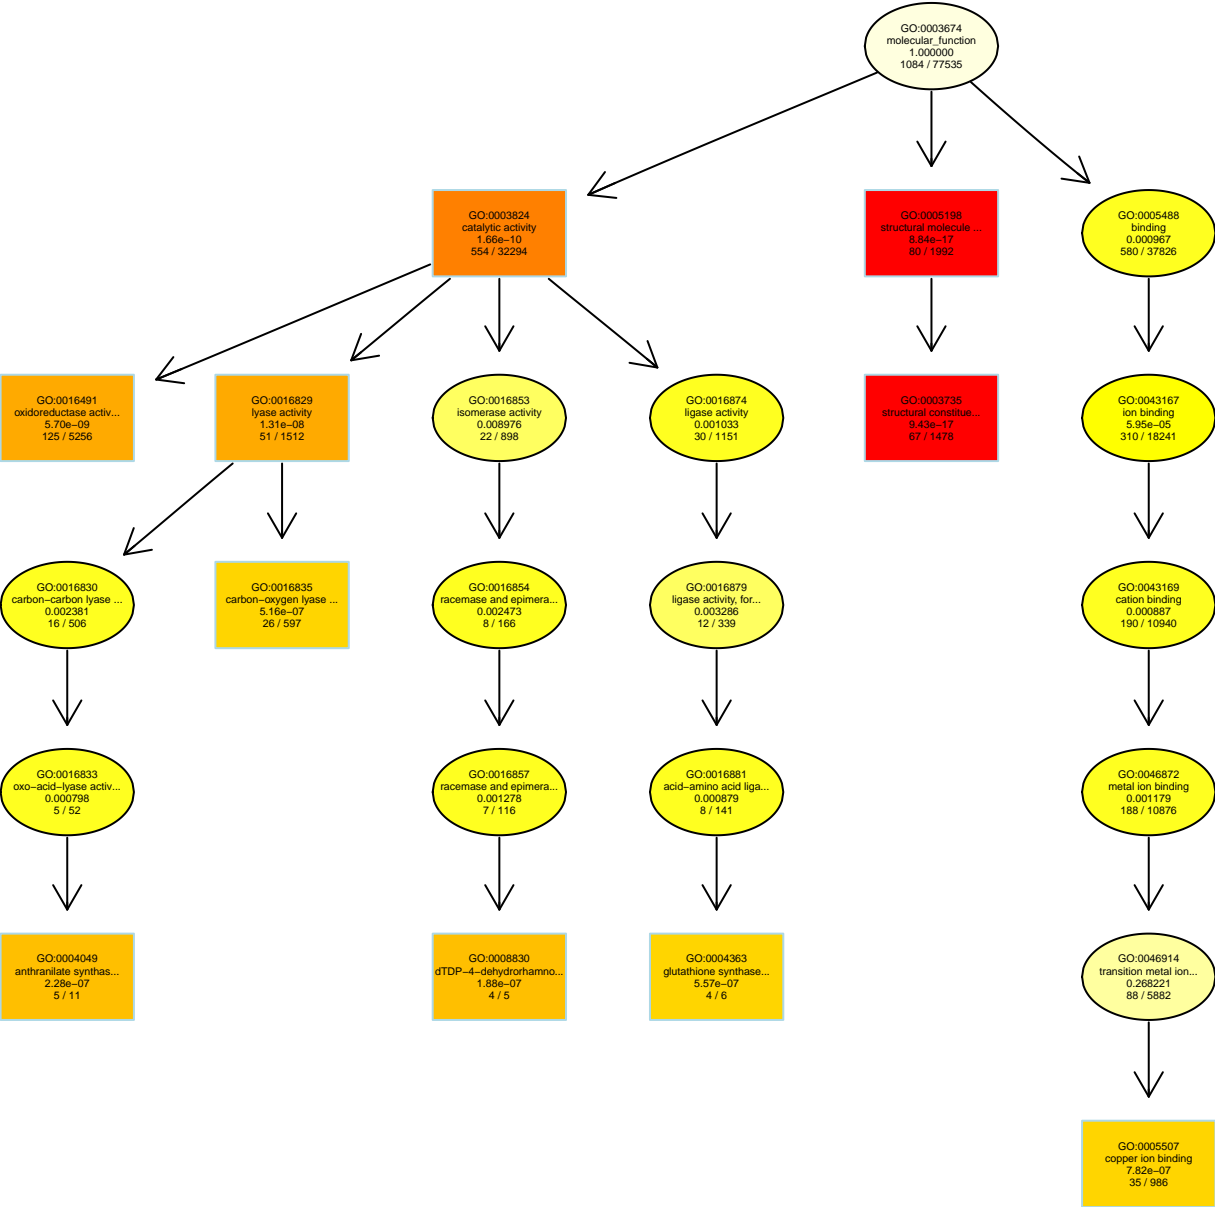

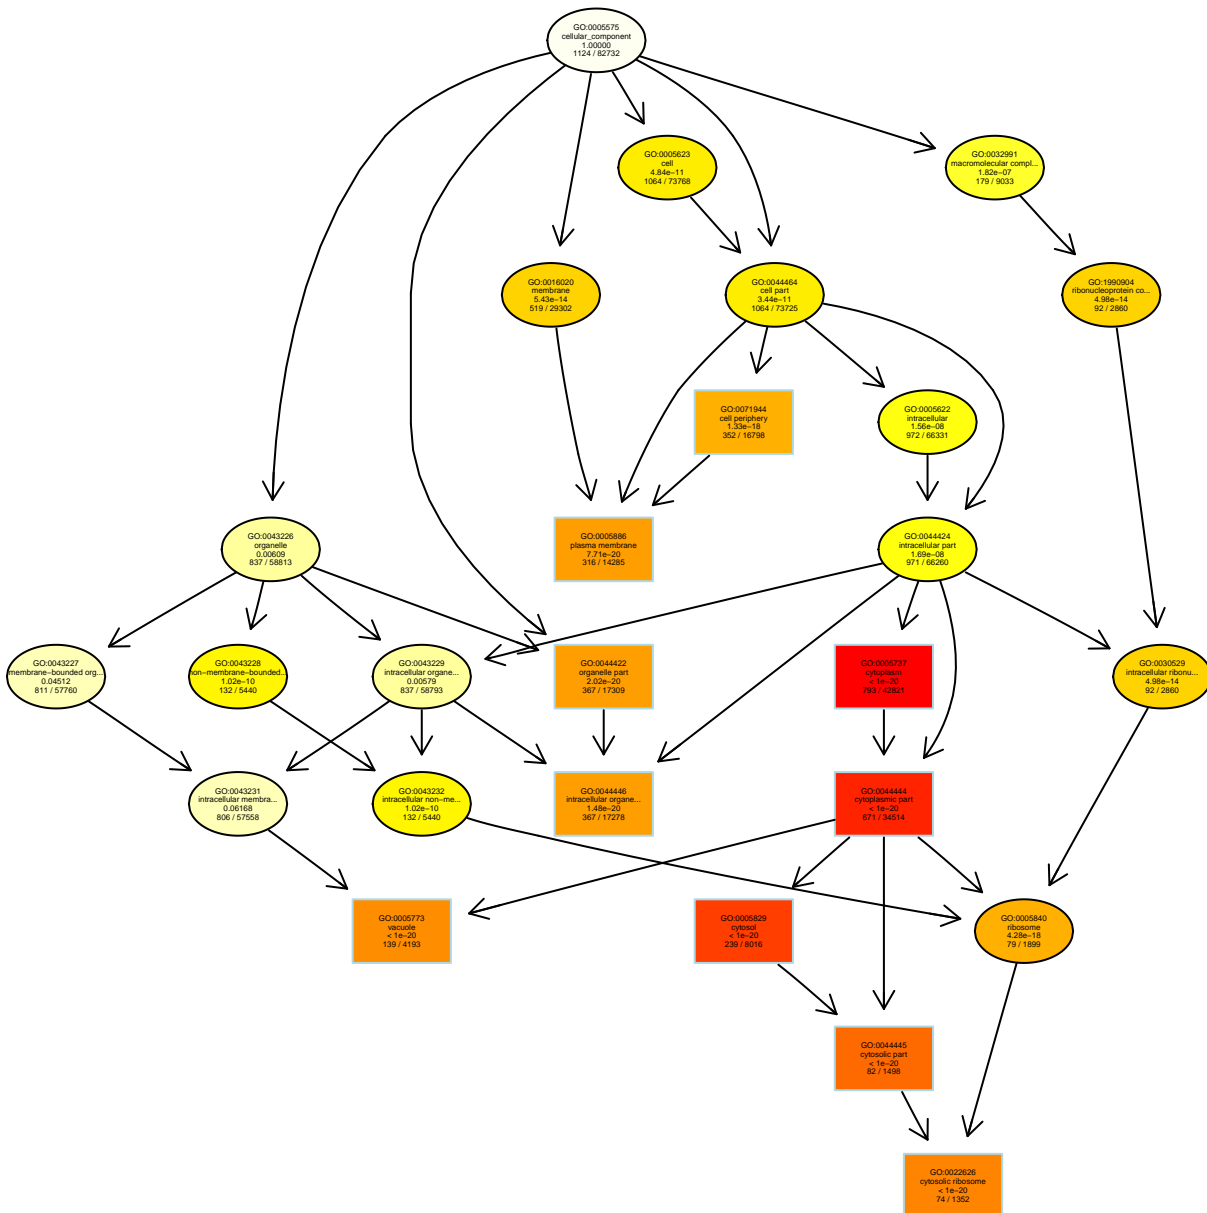

Supplement: s1 [file s1]

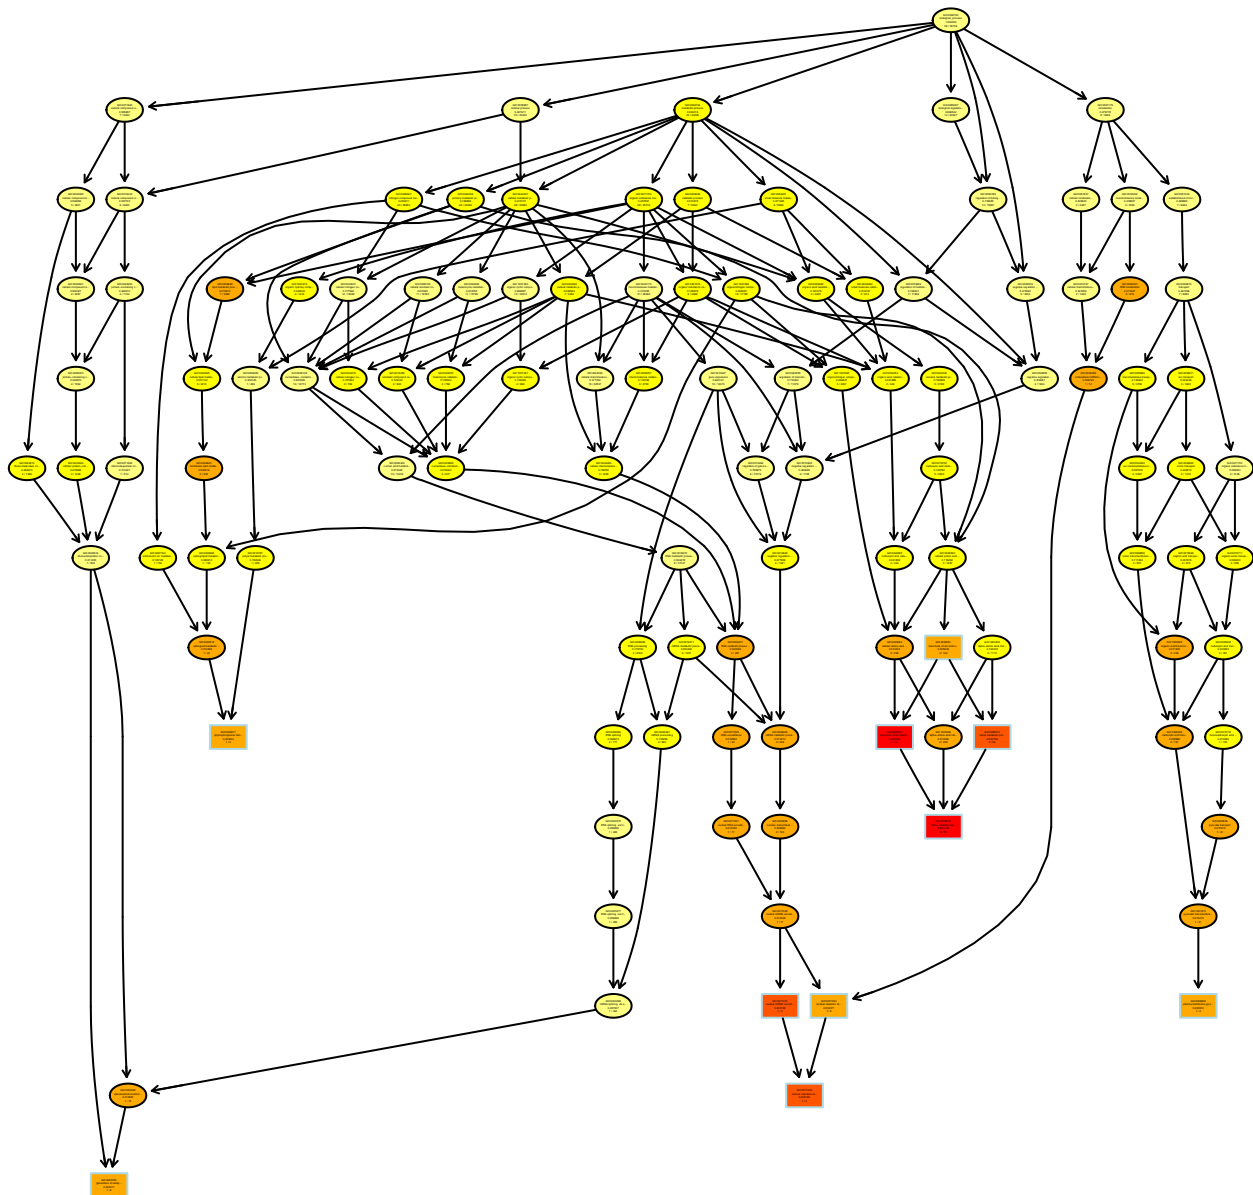

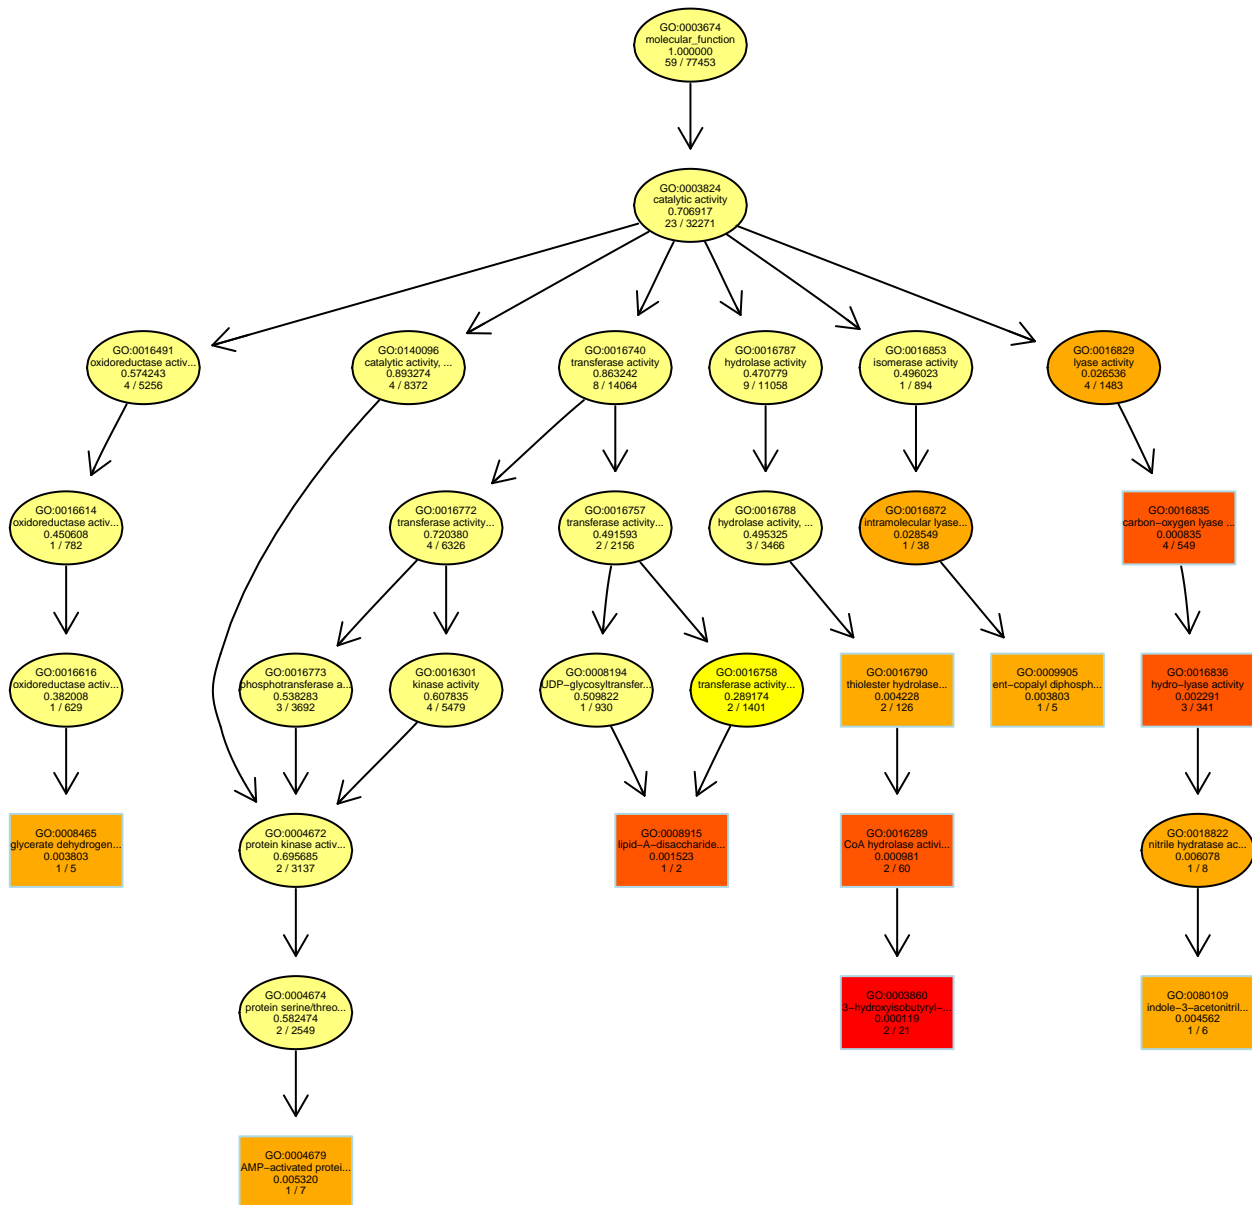

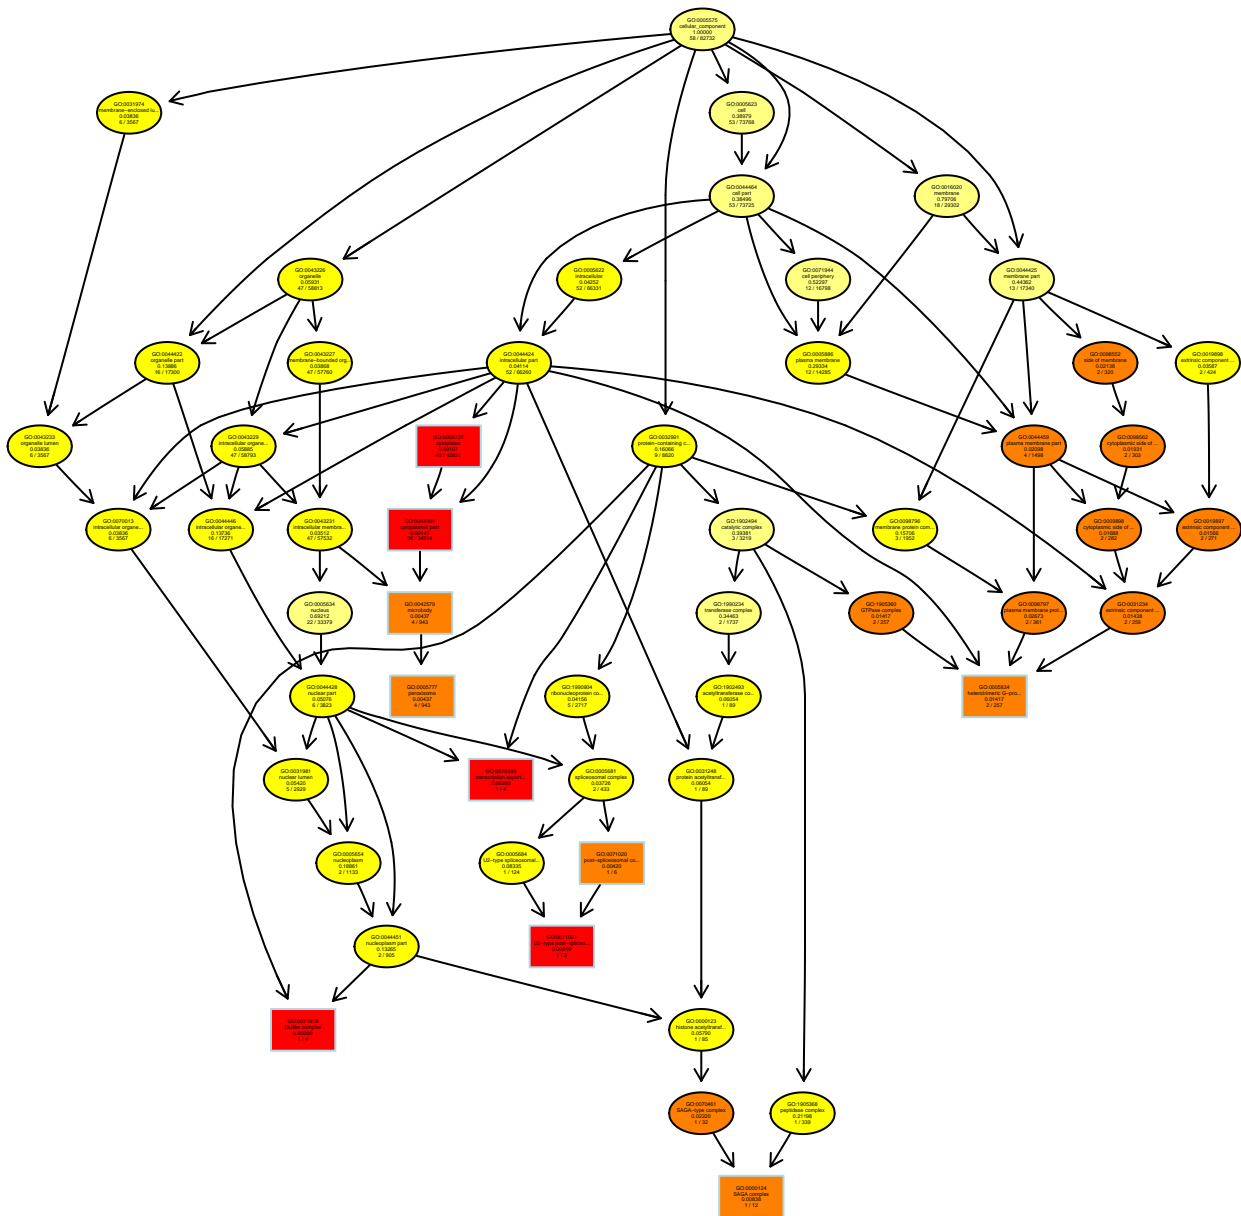

Supplement: s1 [file s1]

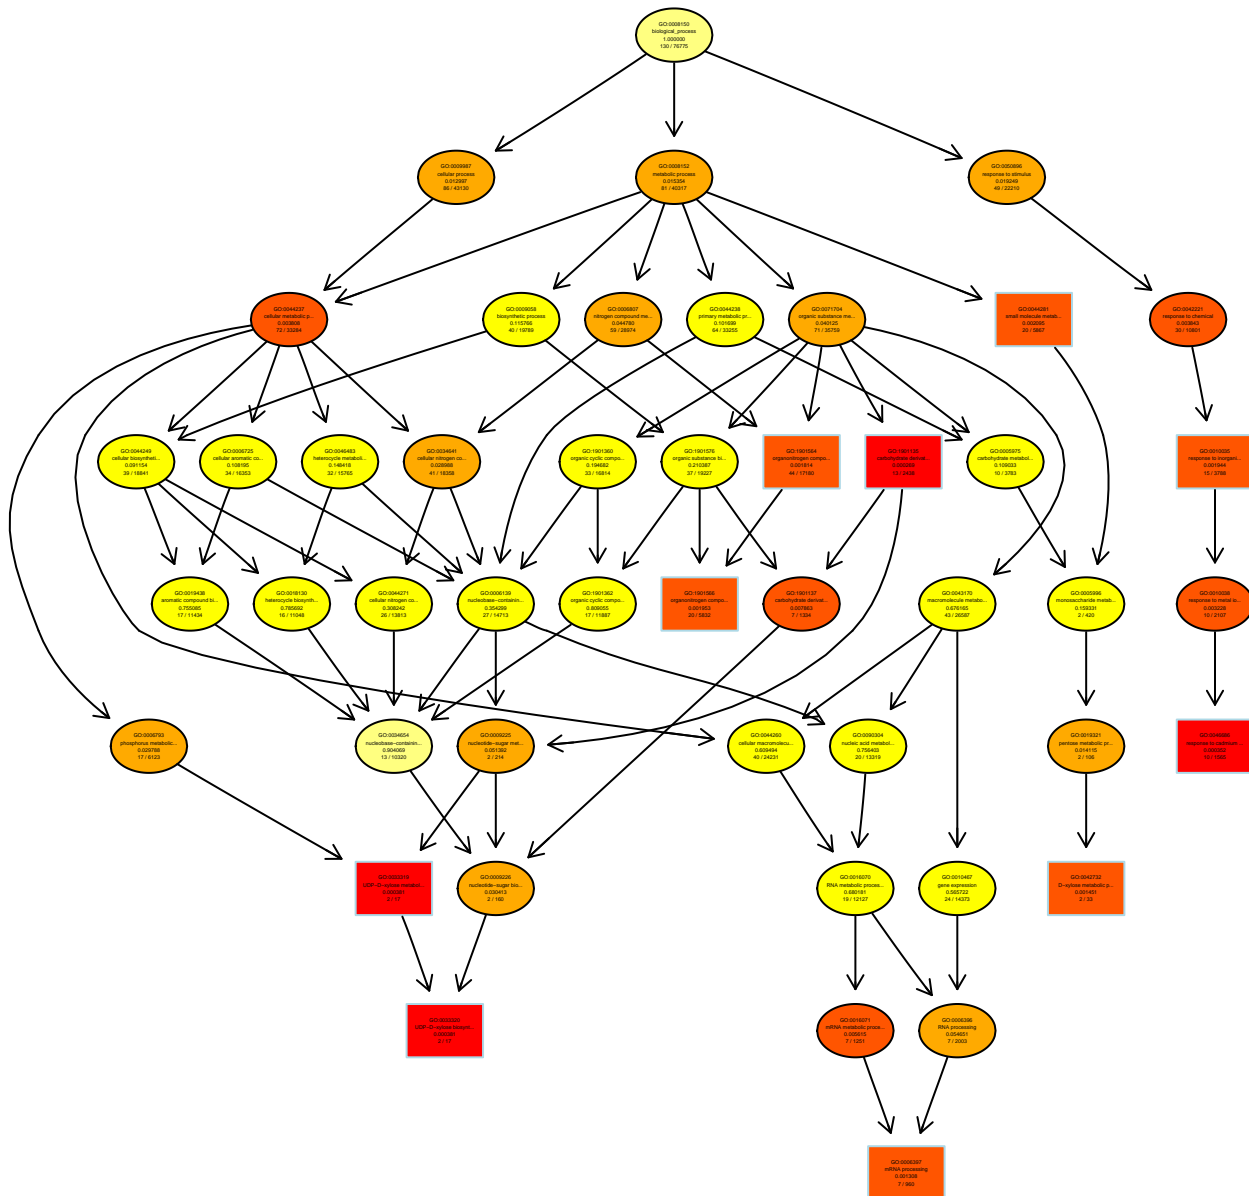

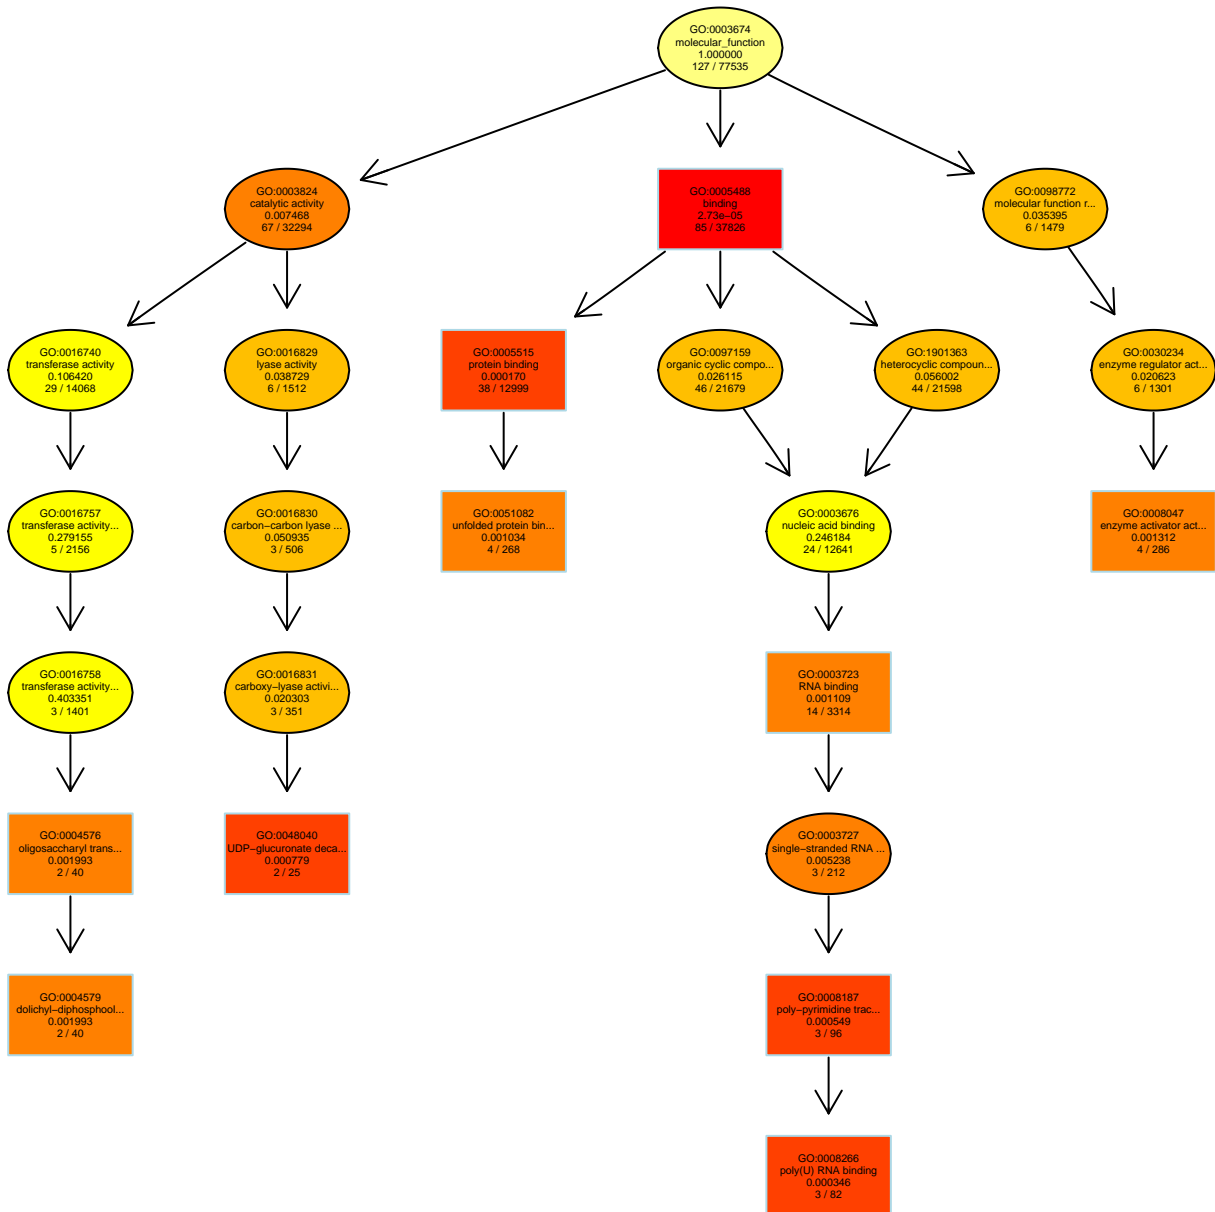

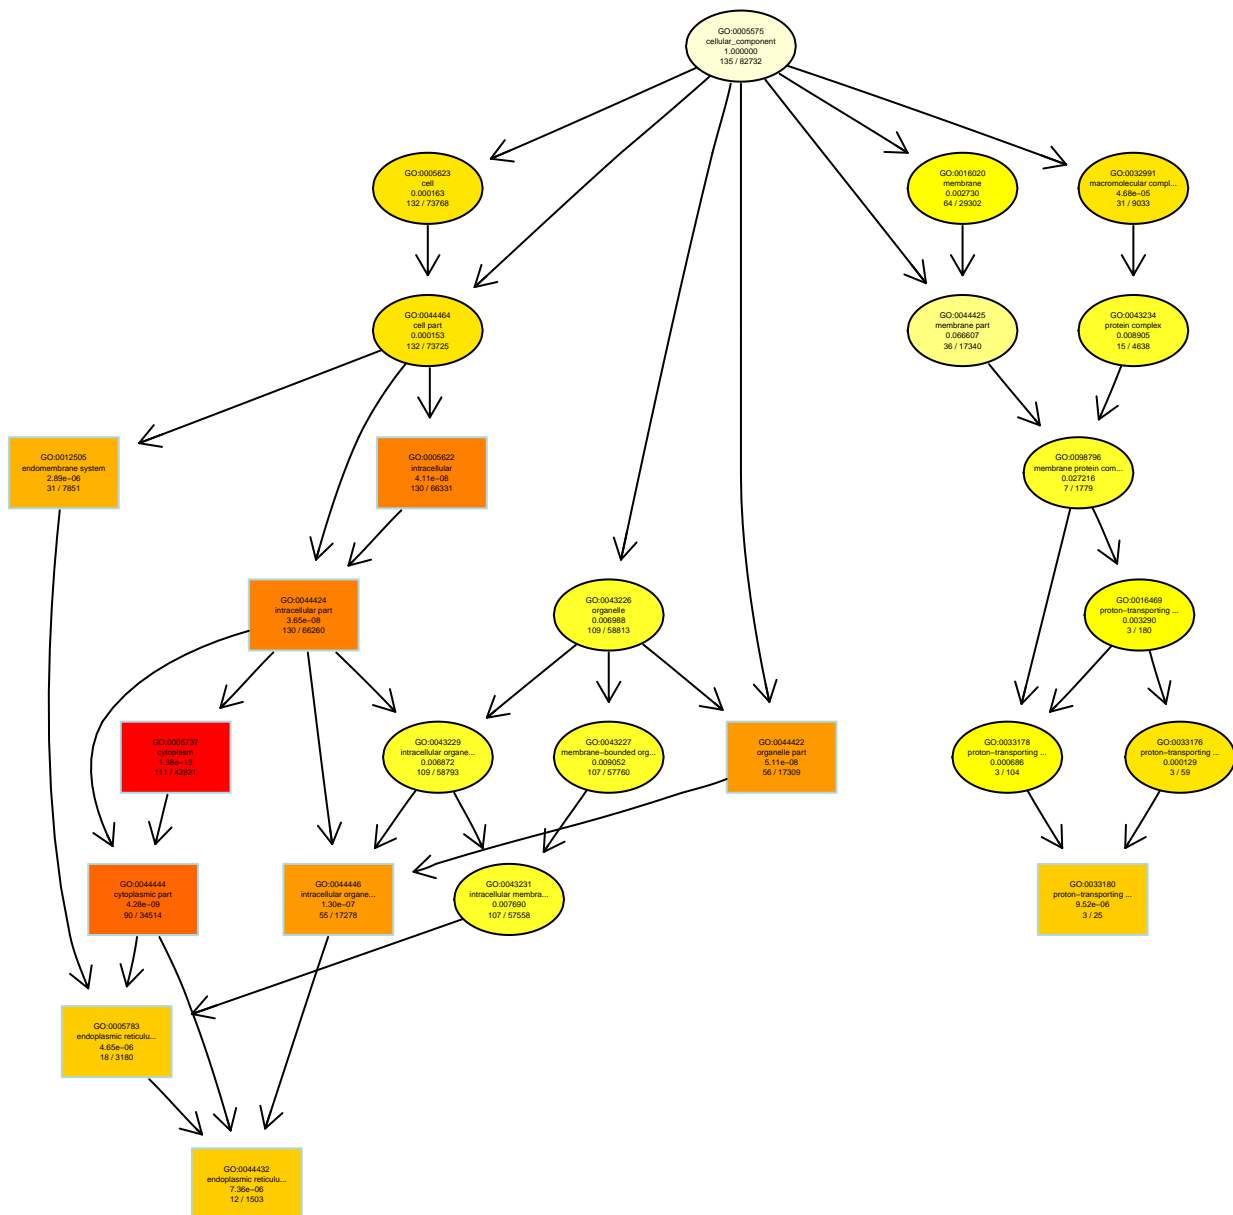

Supplement: s1 [file s1]

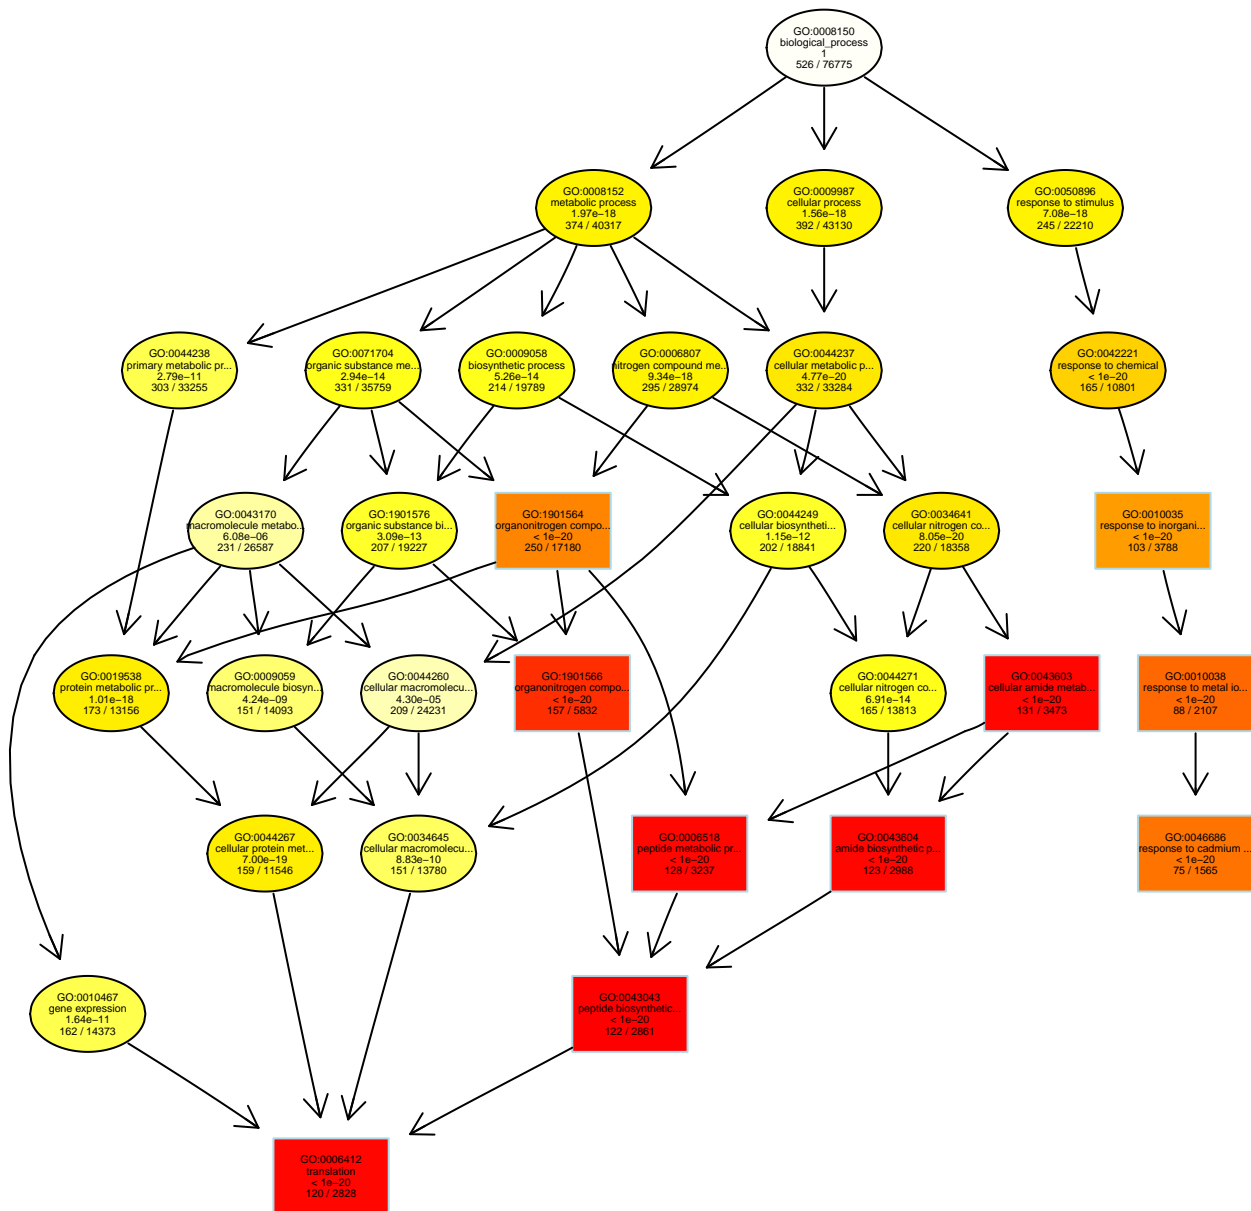

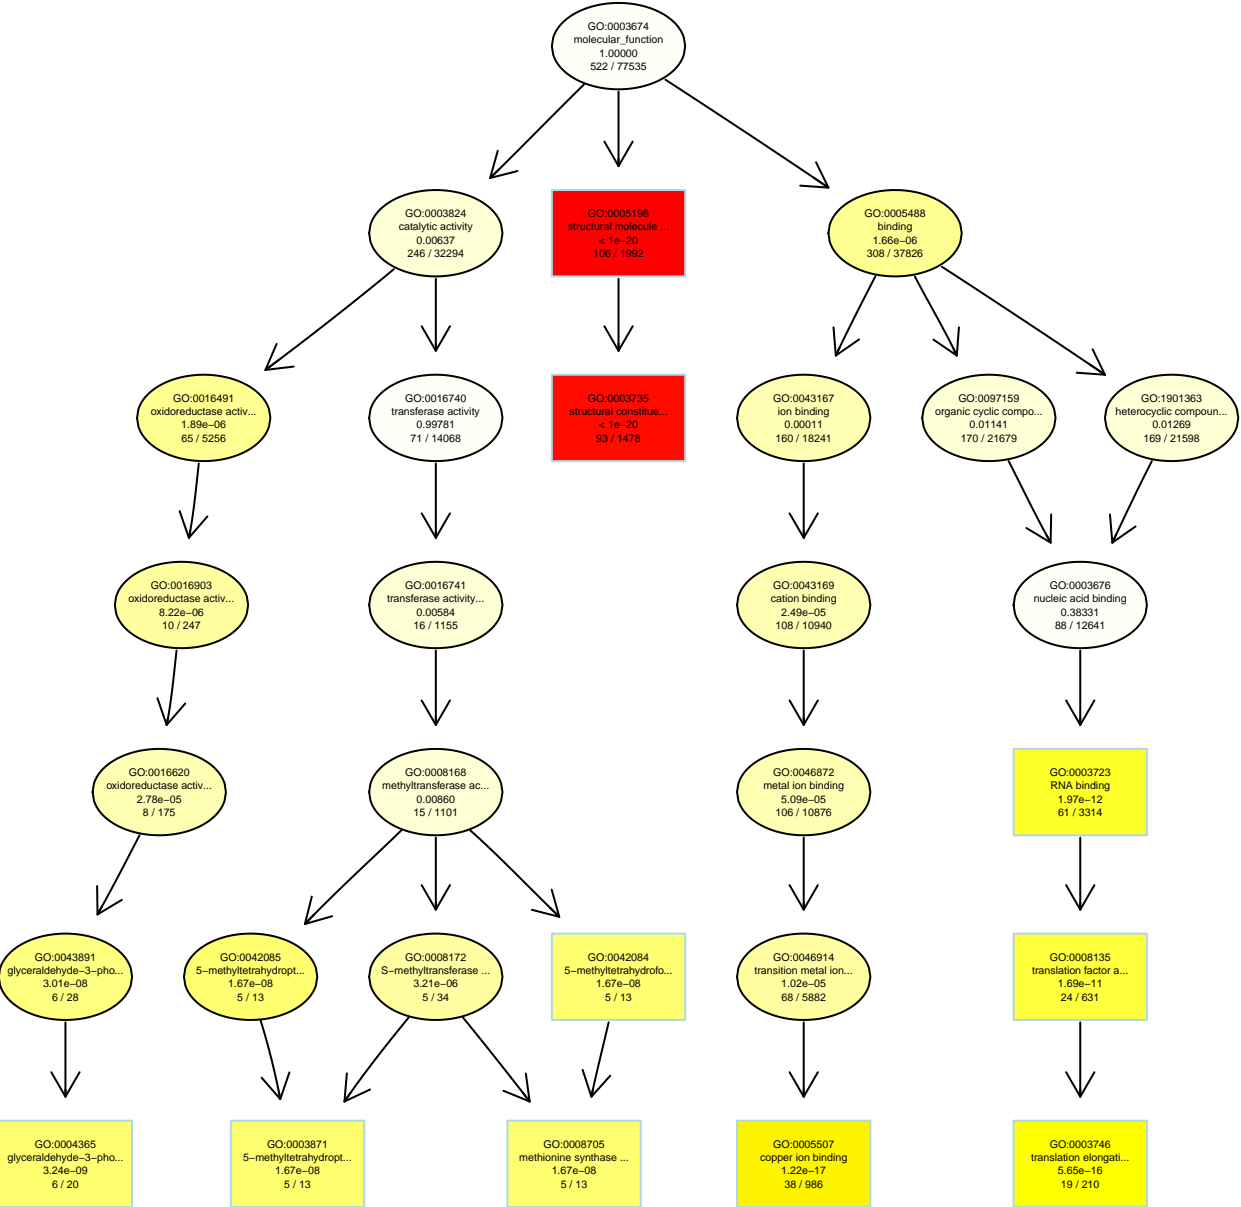

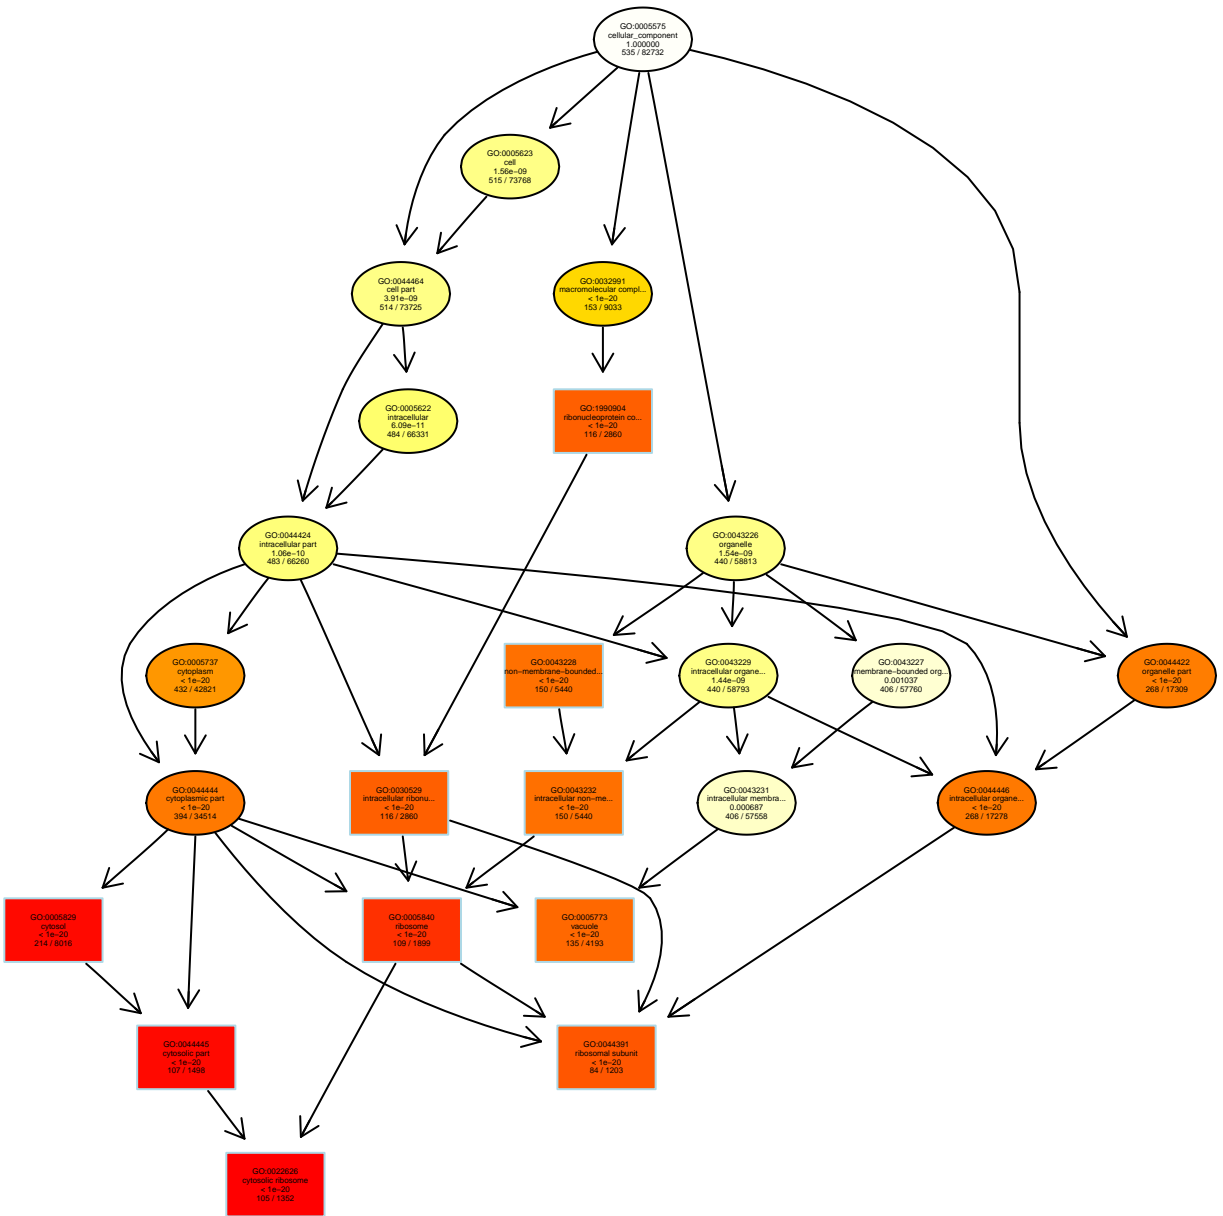

Supplement: s1 [file s1]





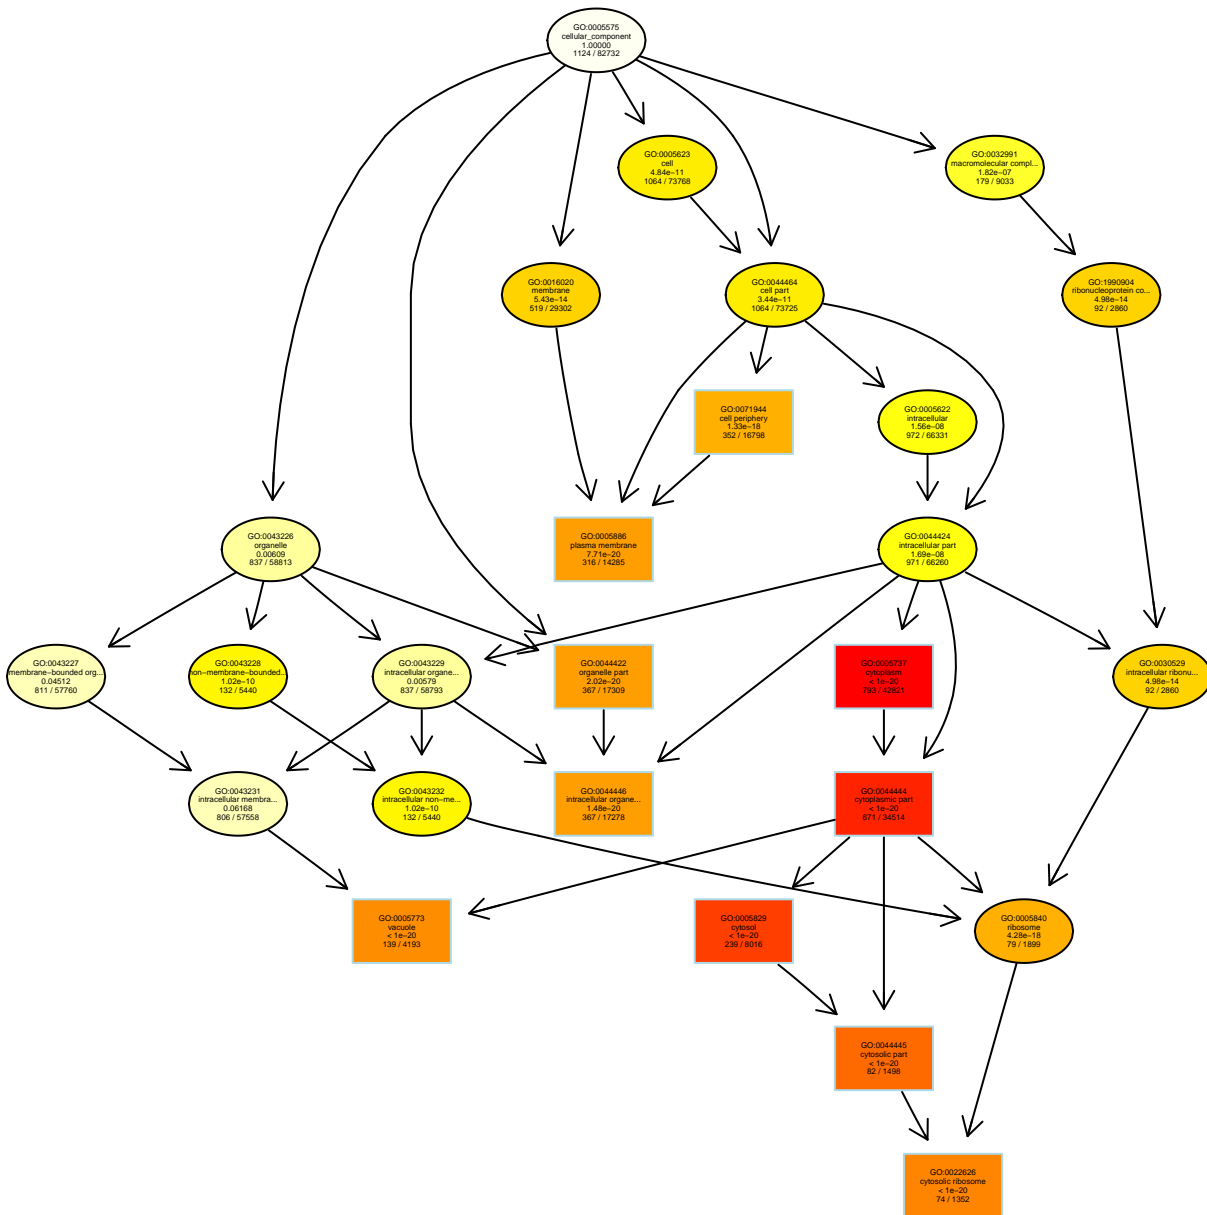

Supplement: s1 [file s1]

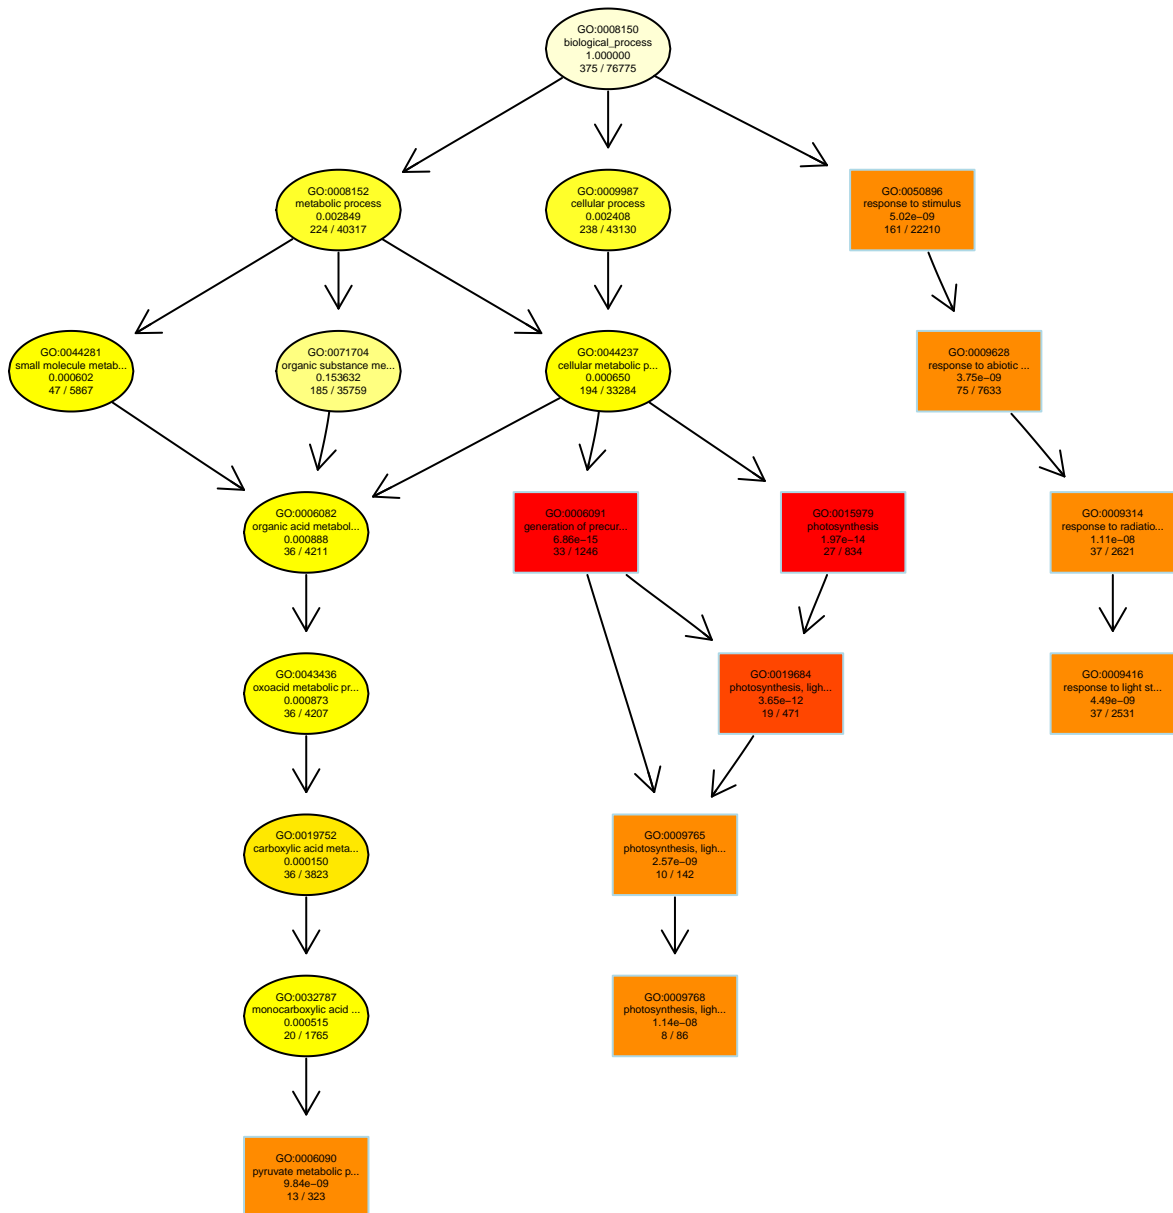

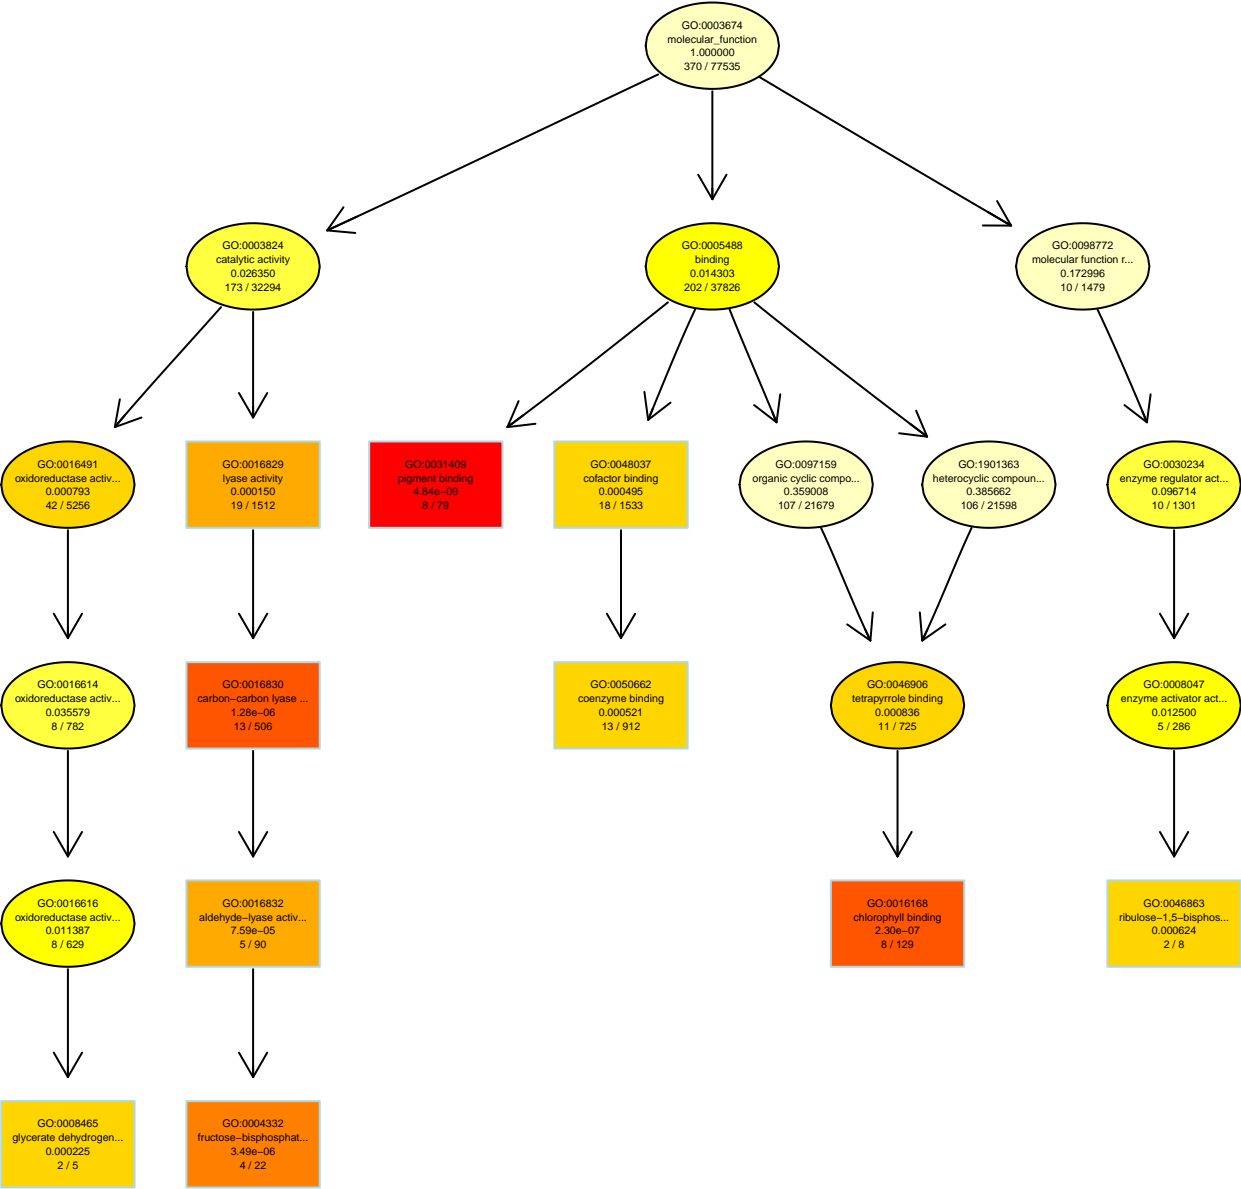

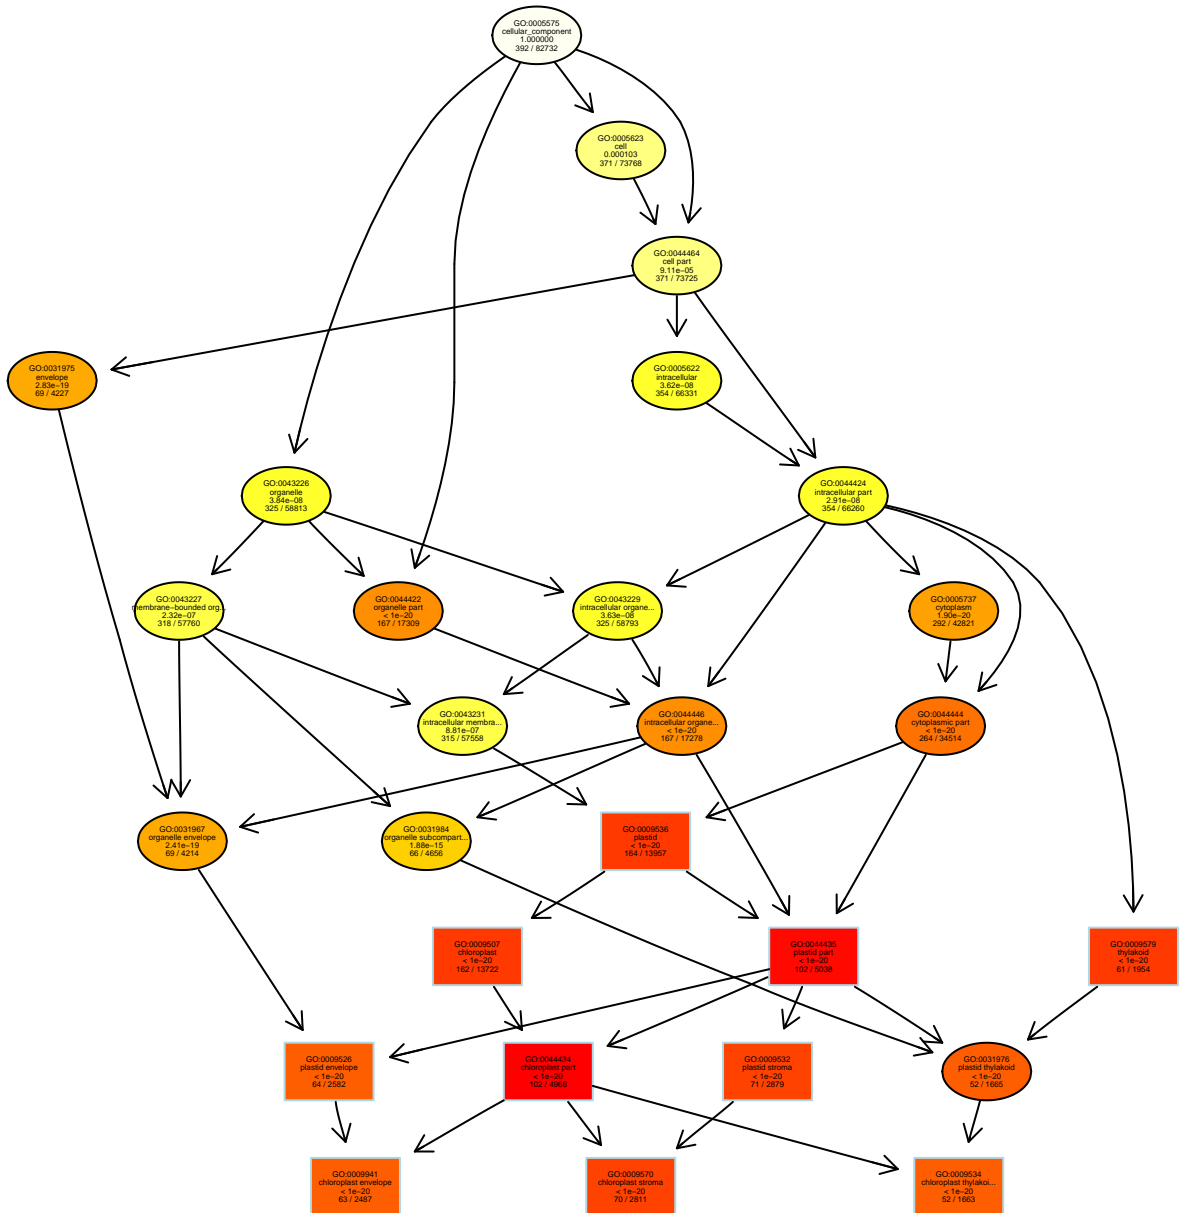

Supplement: s1 [file s1]

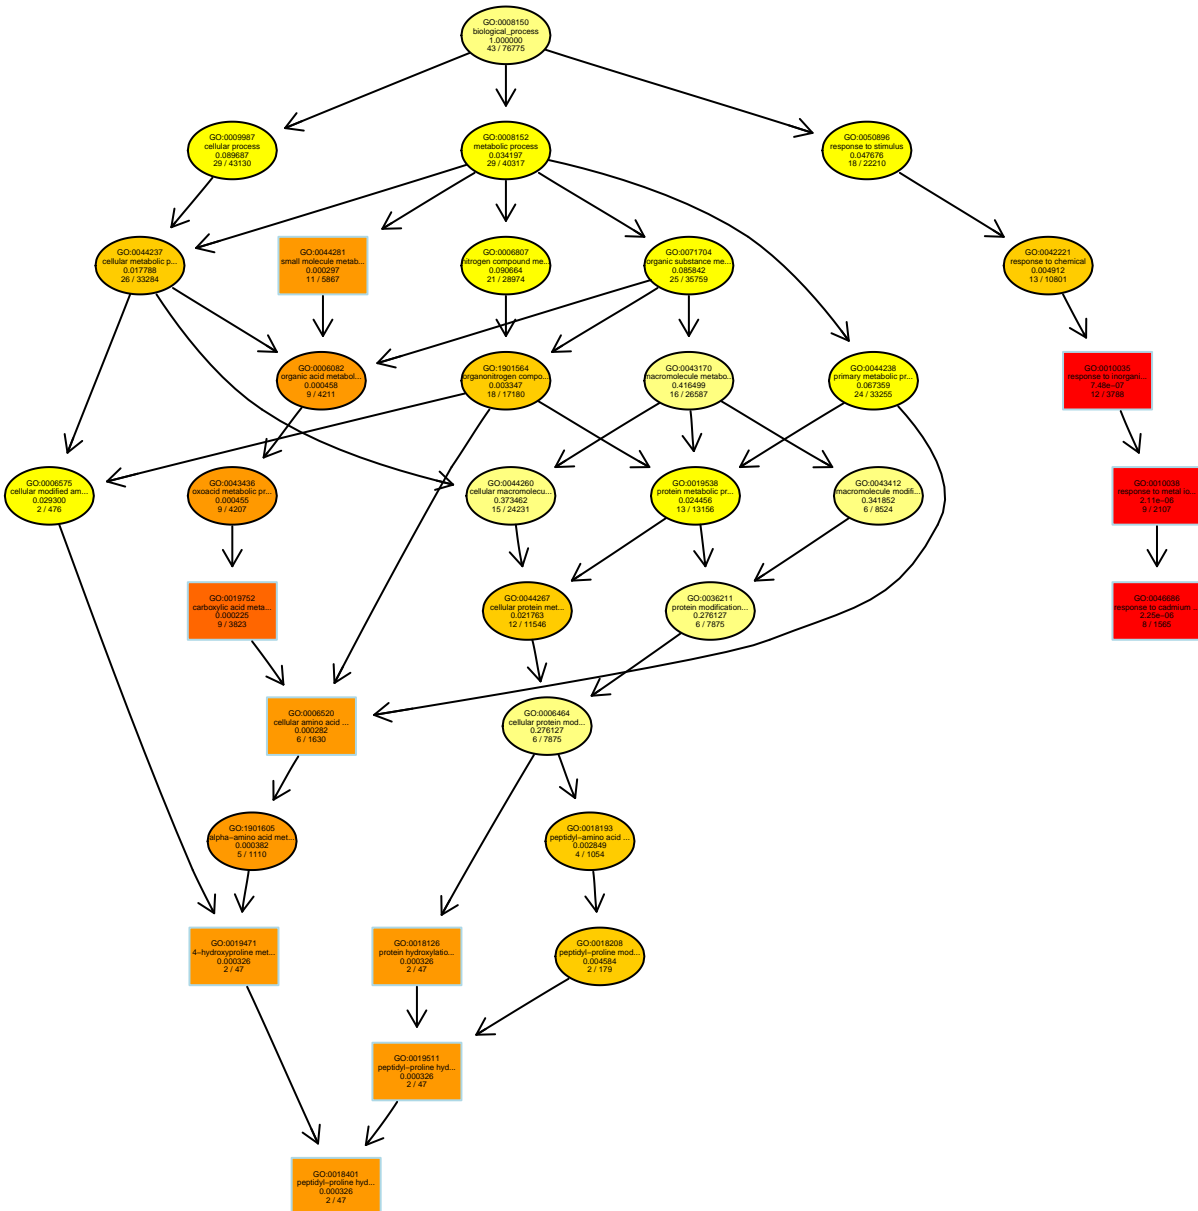

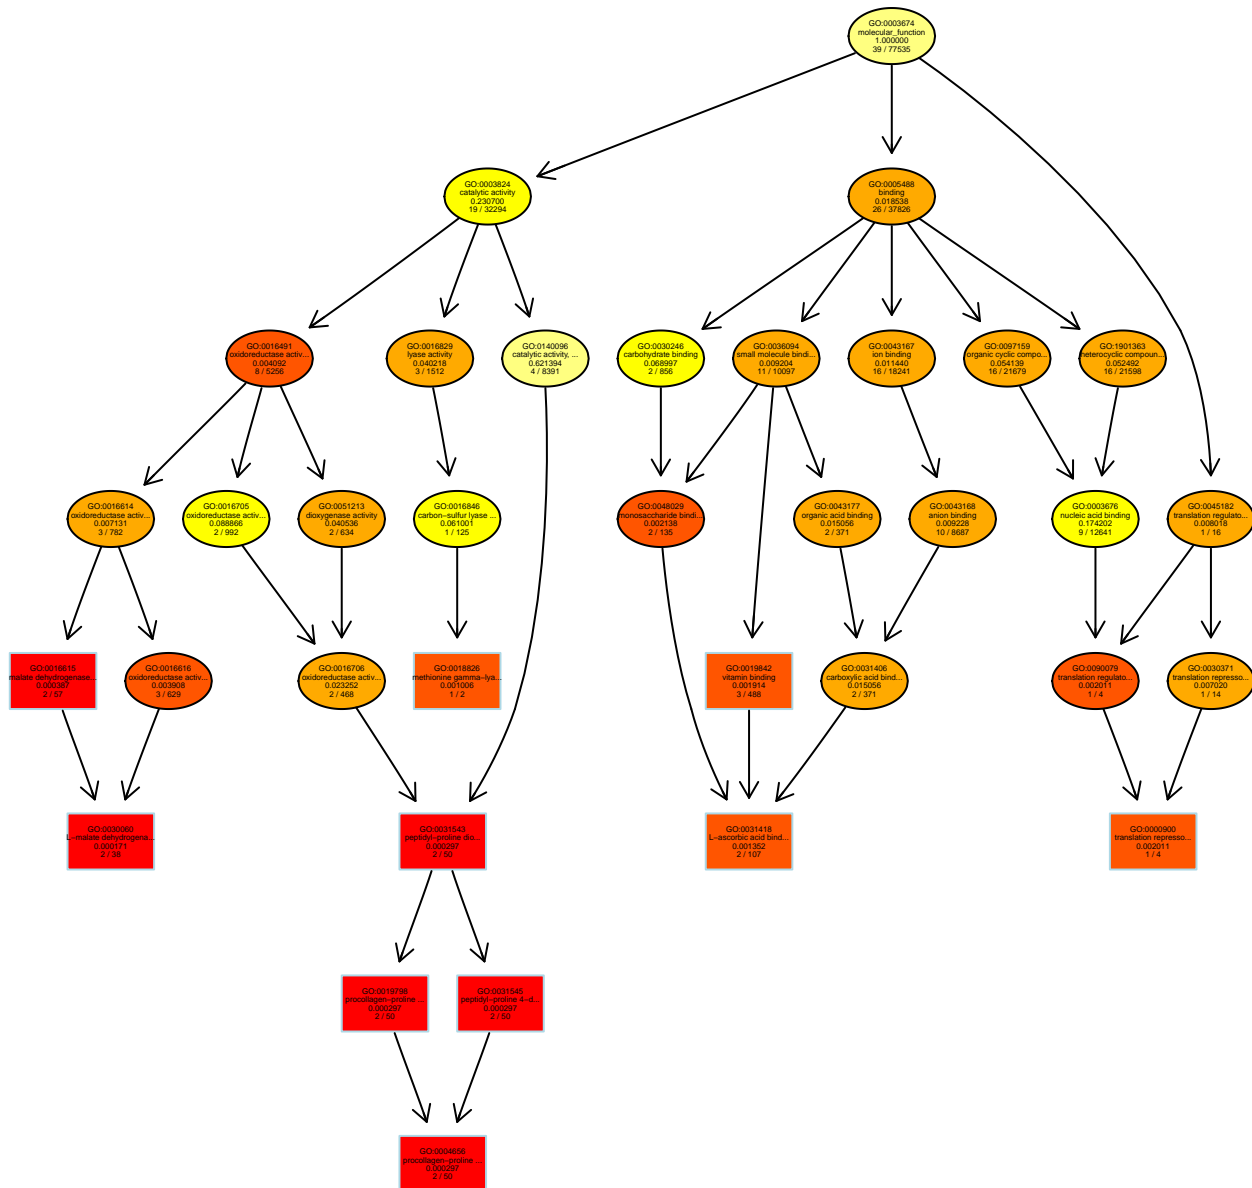

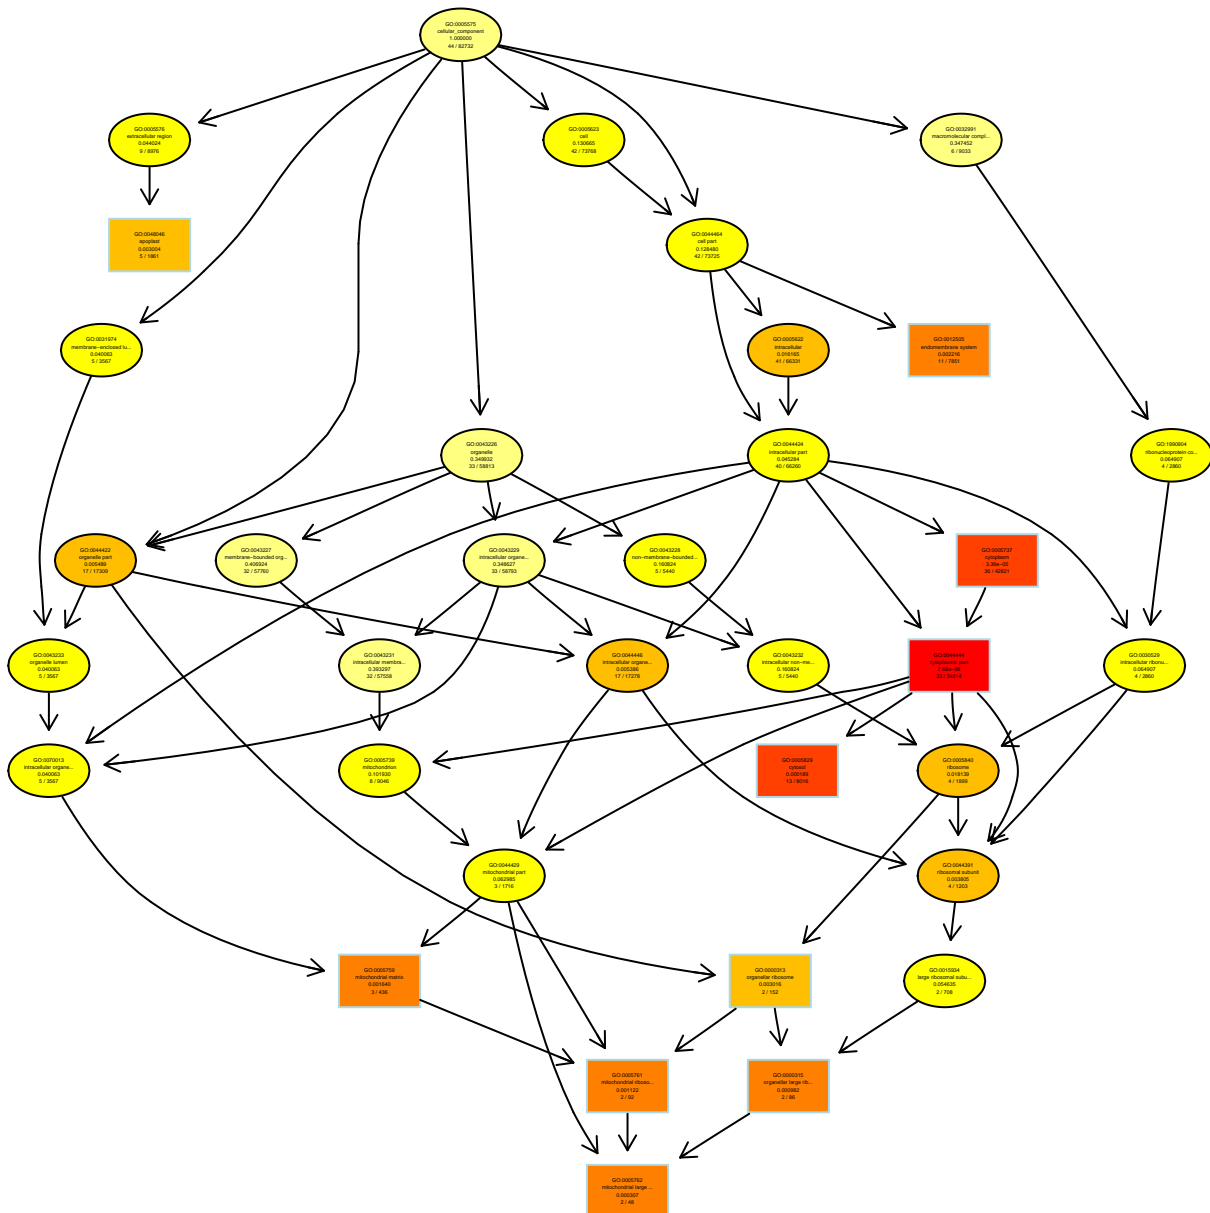

Supplement: s1 [file s1]

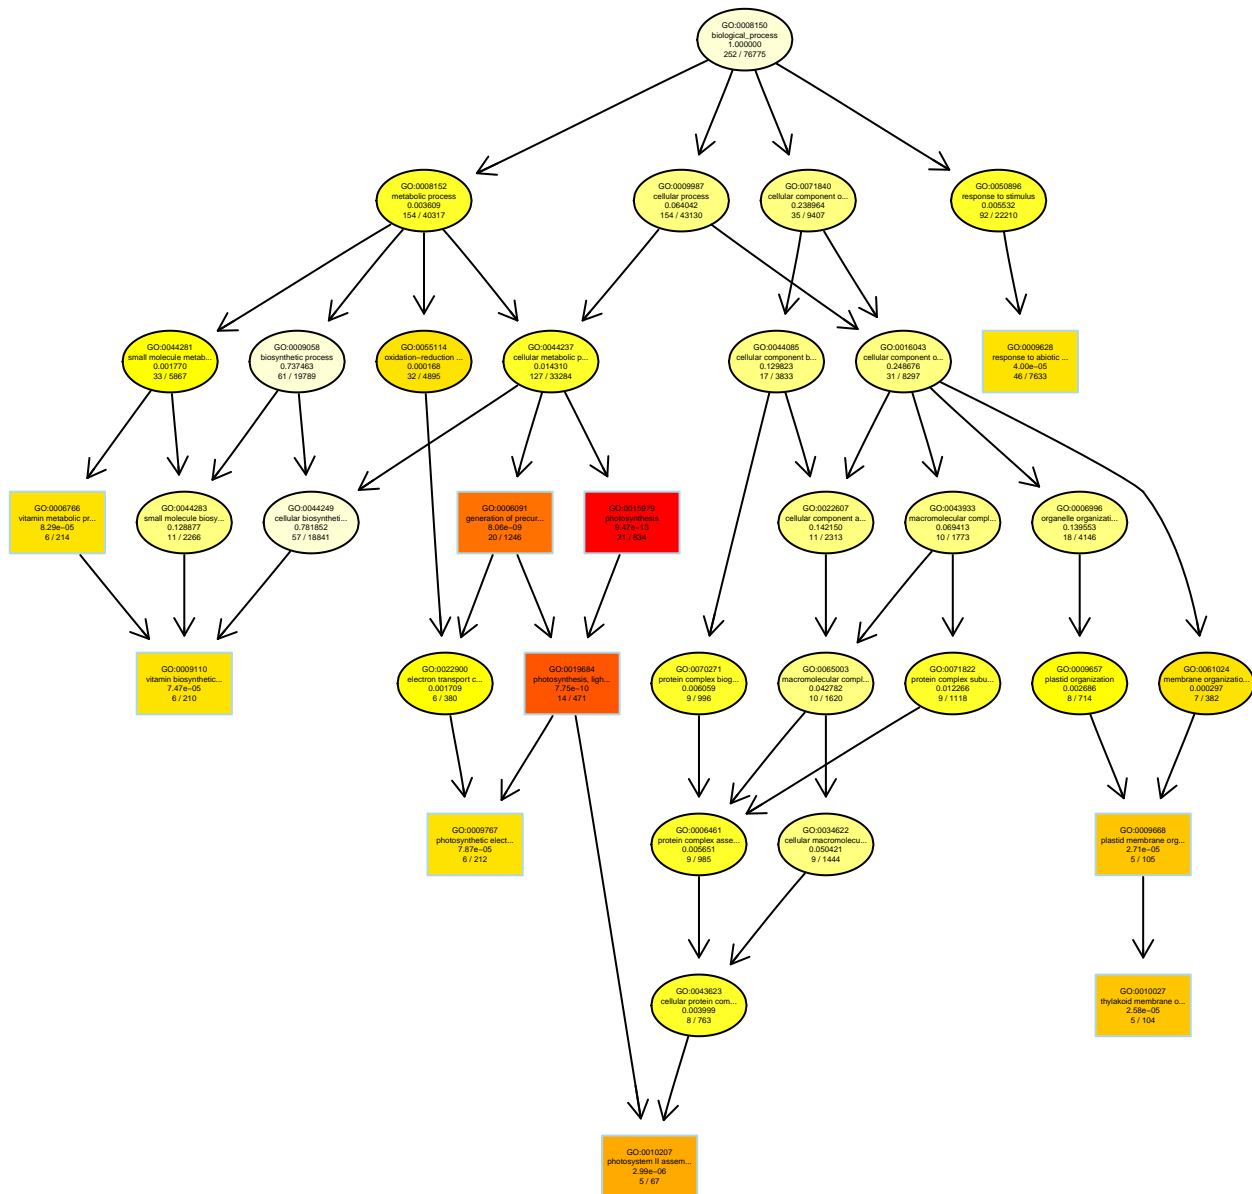

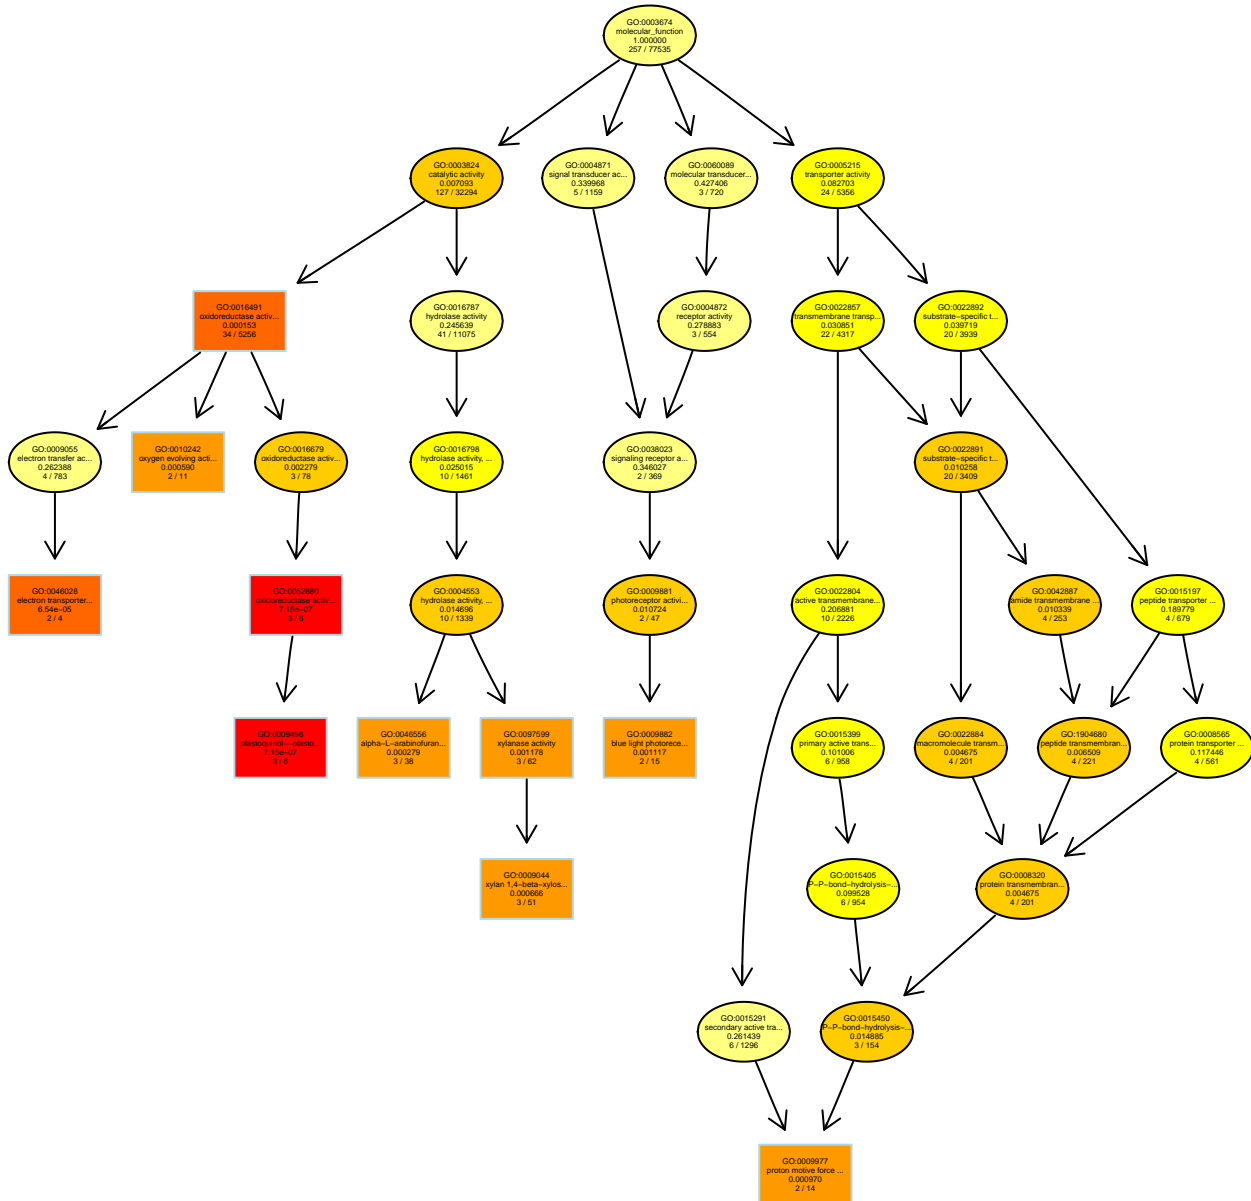

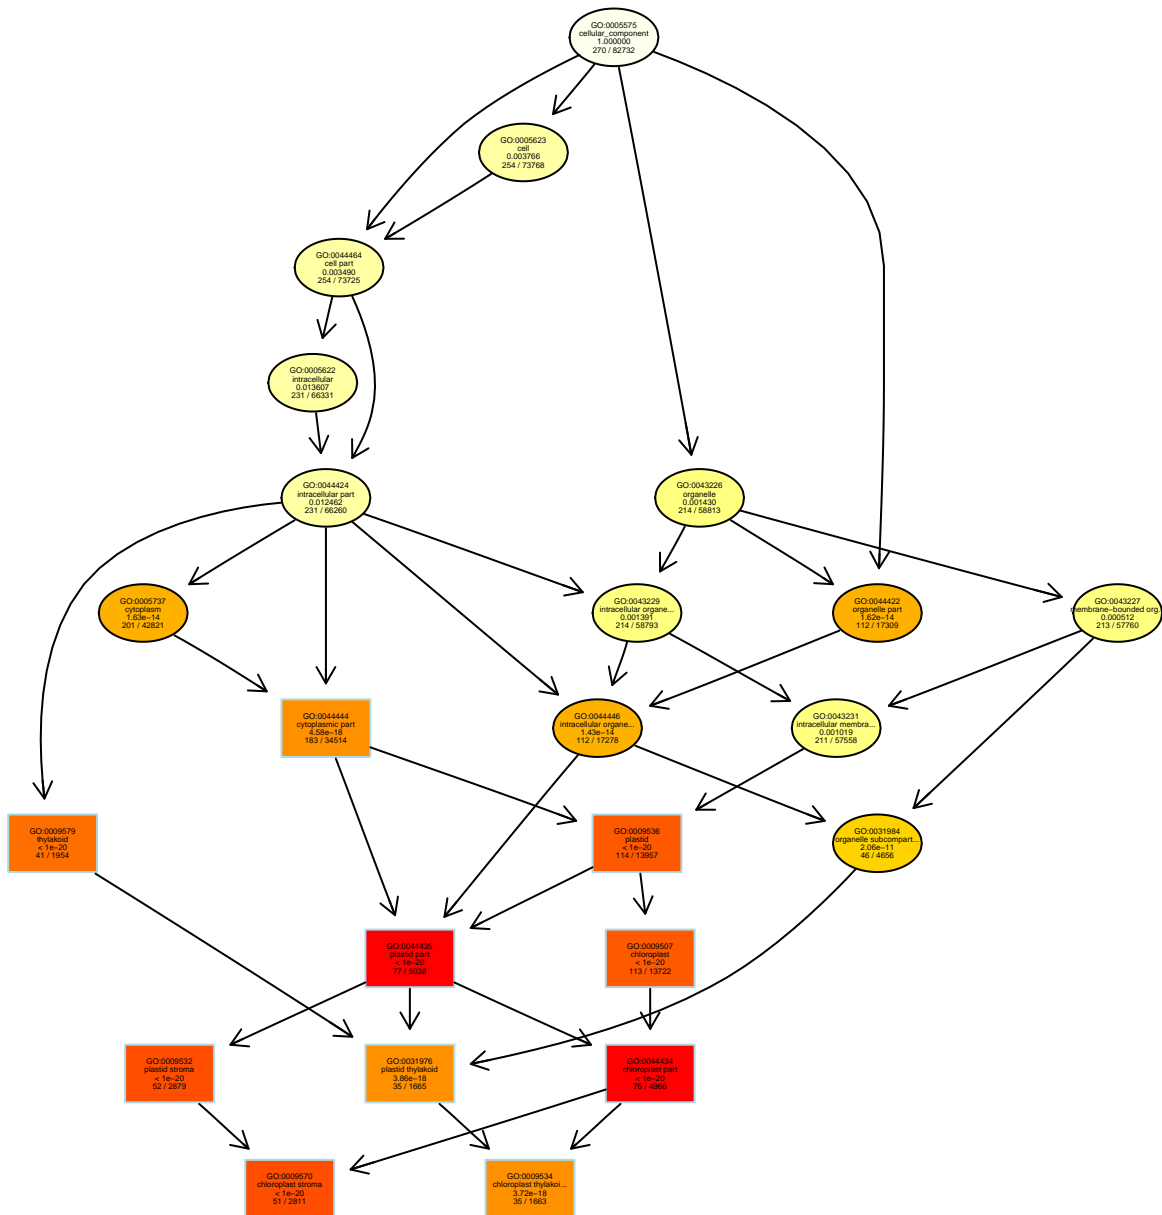

Supplement: s1 [file s1]

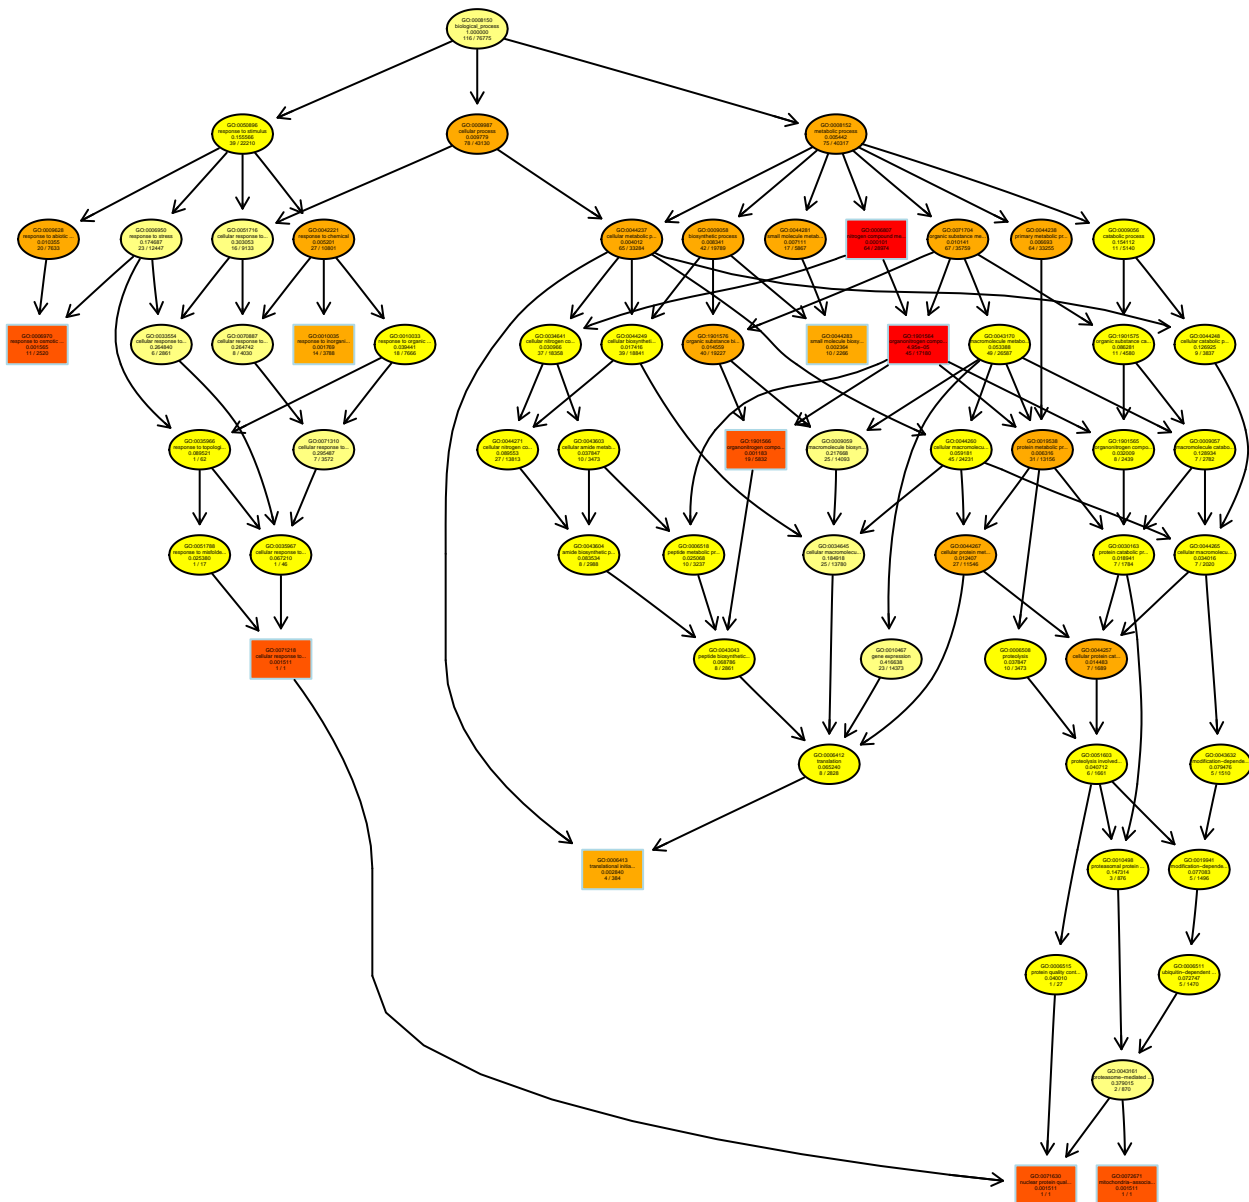

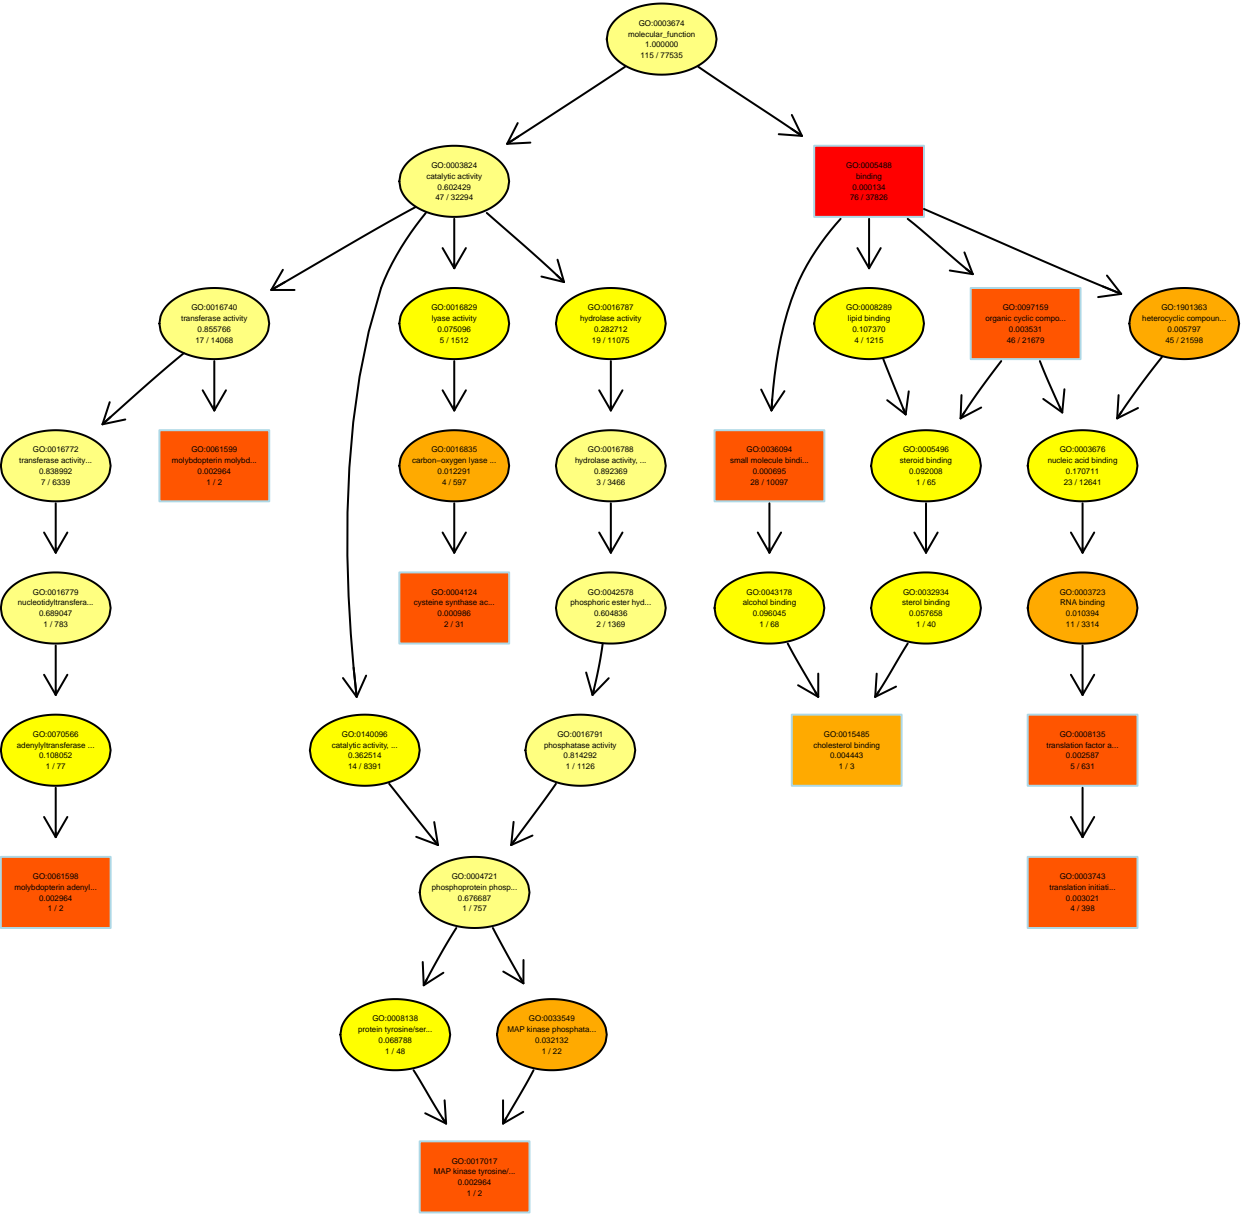

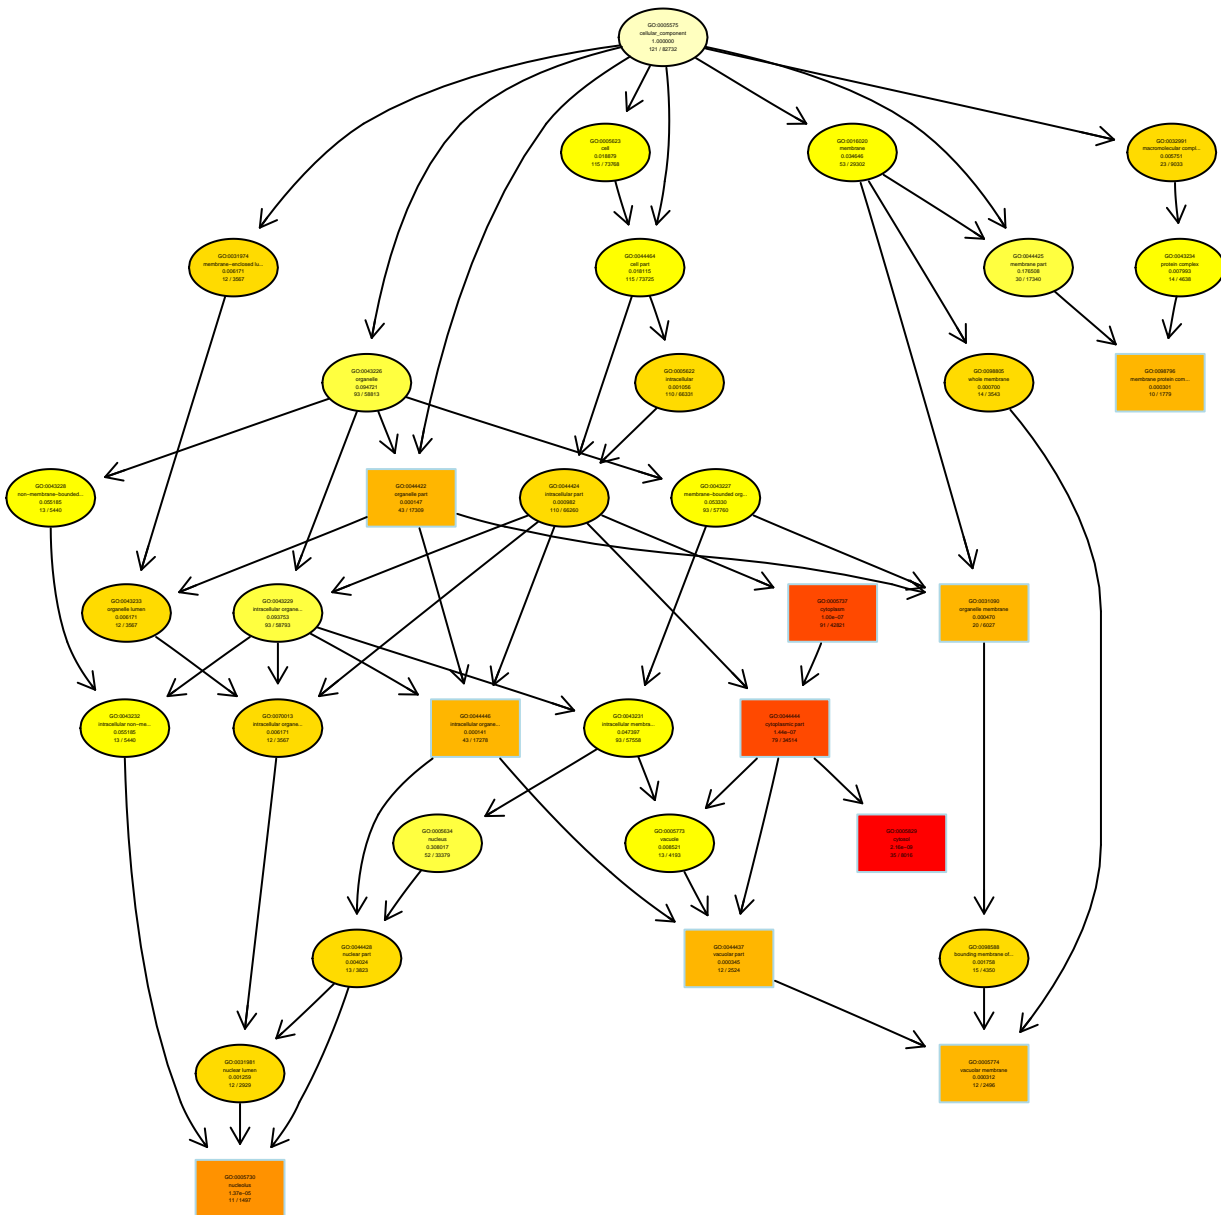

Supplement: s1 [file s1]

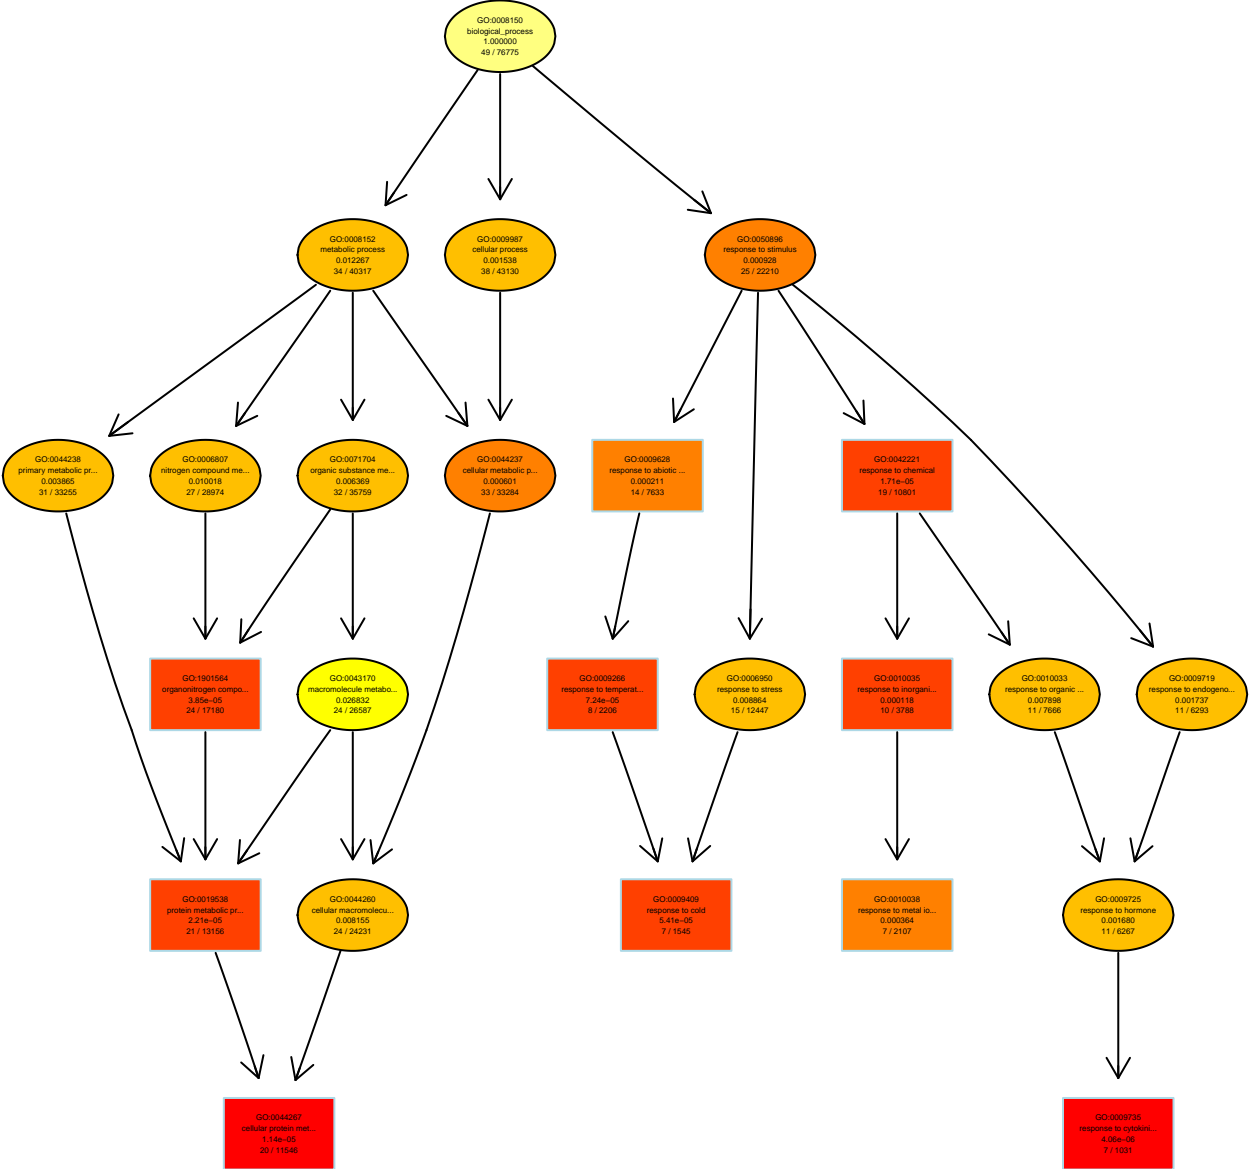

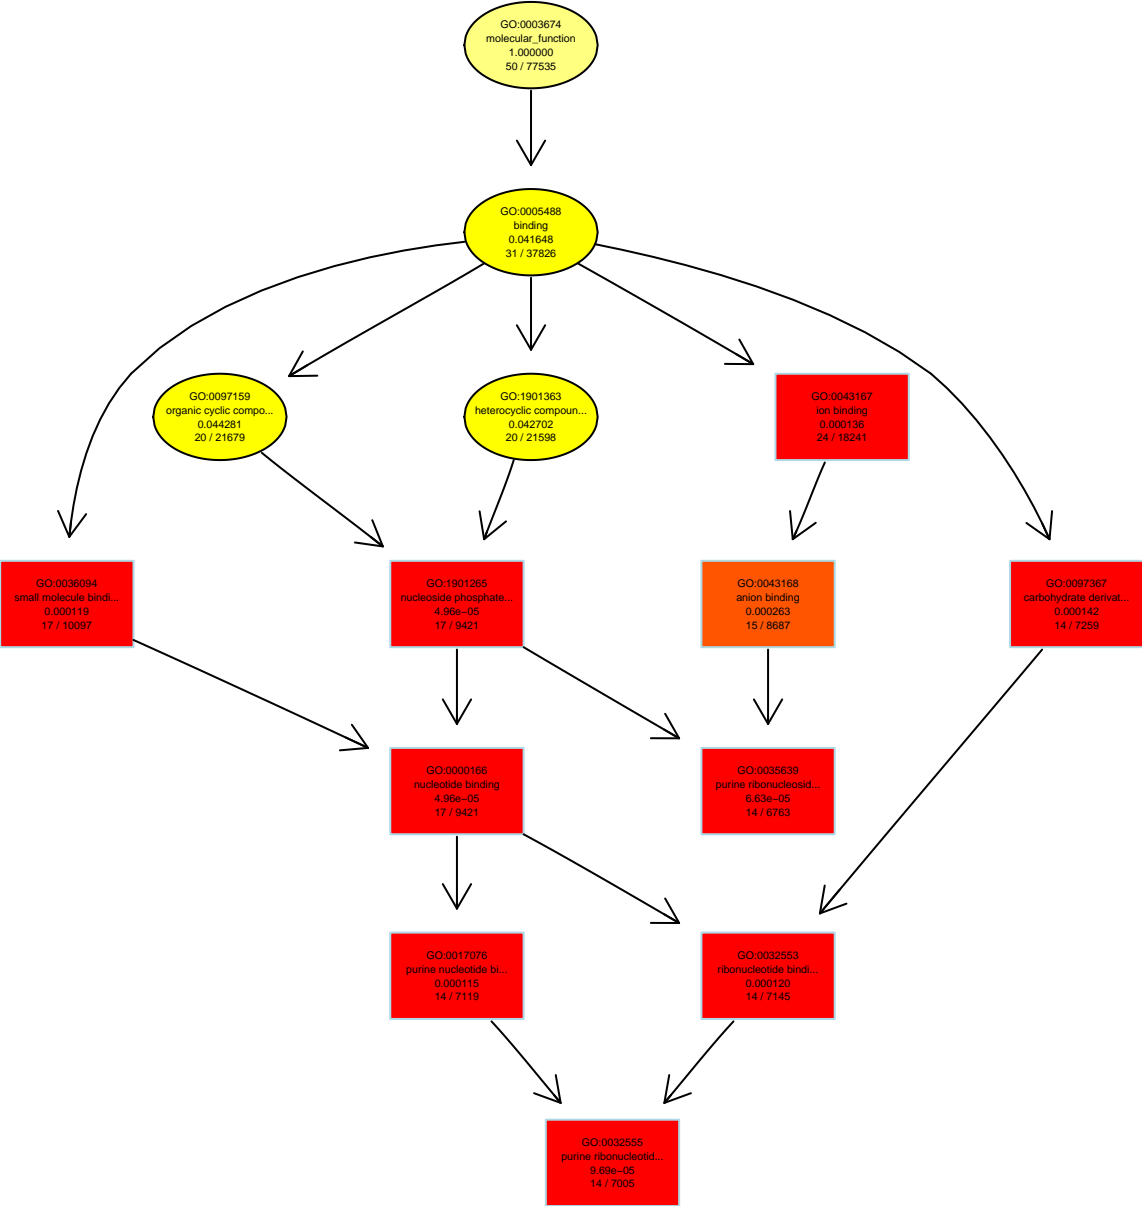

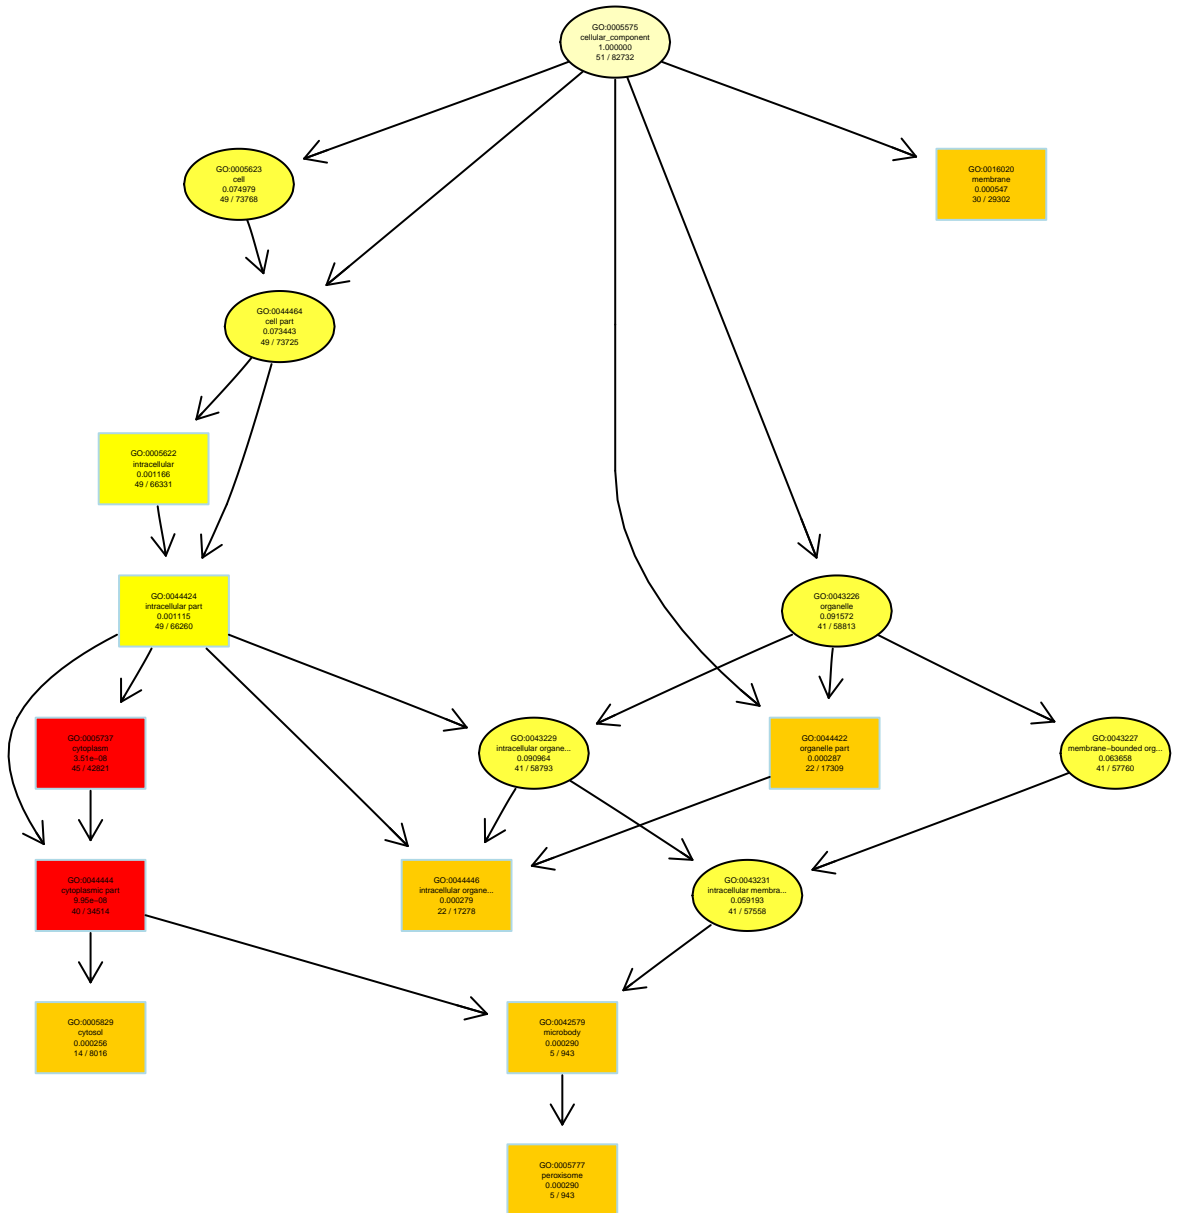

Supplement: s1 [file s1]

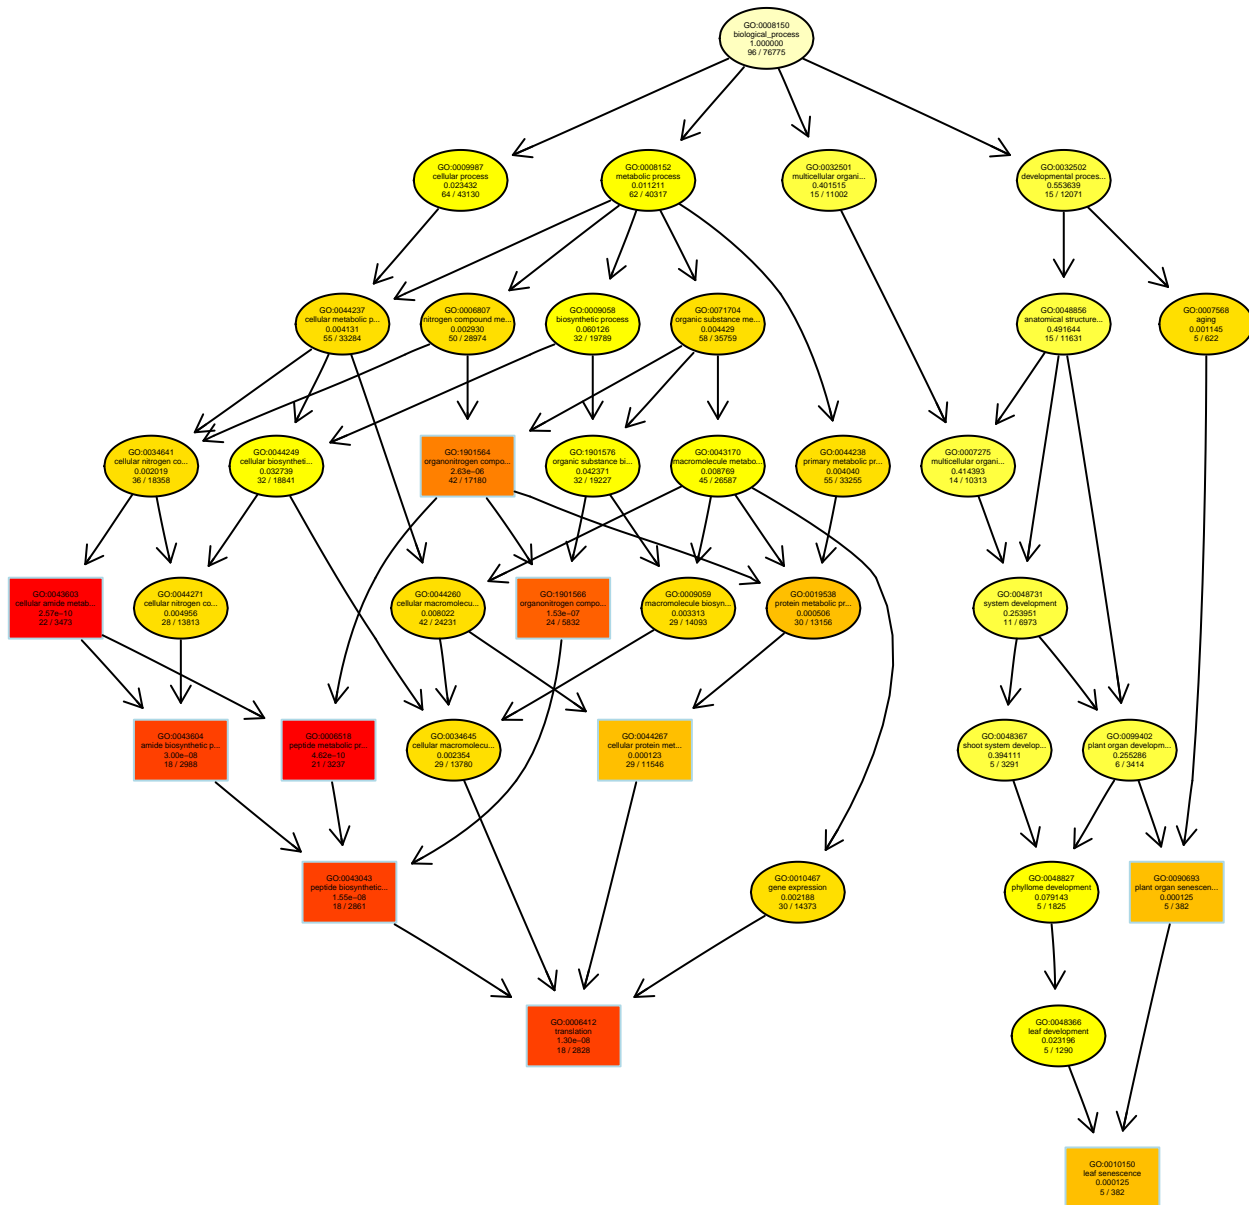

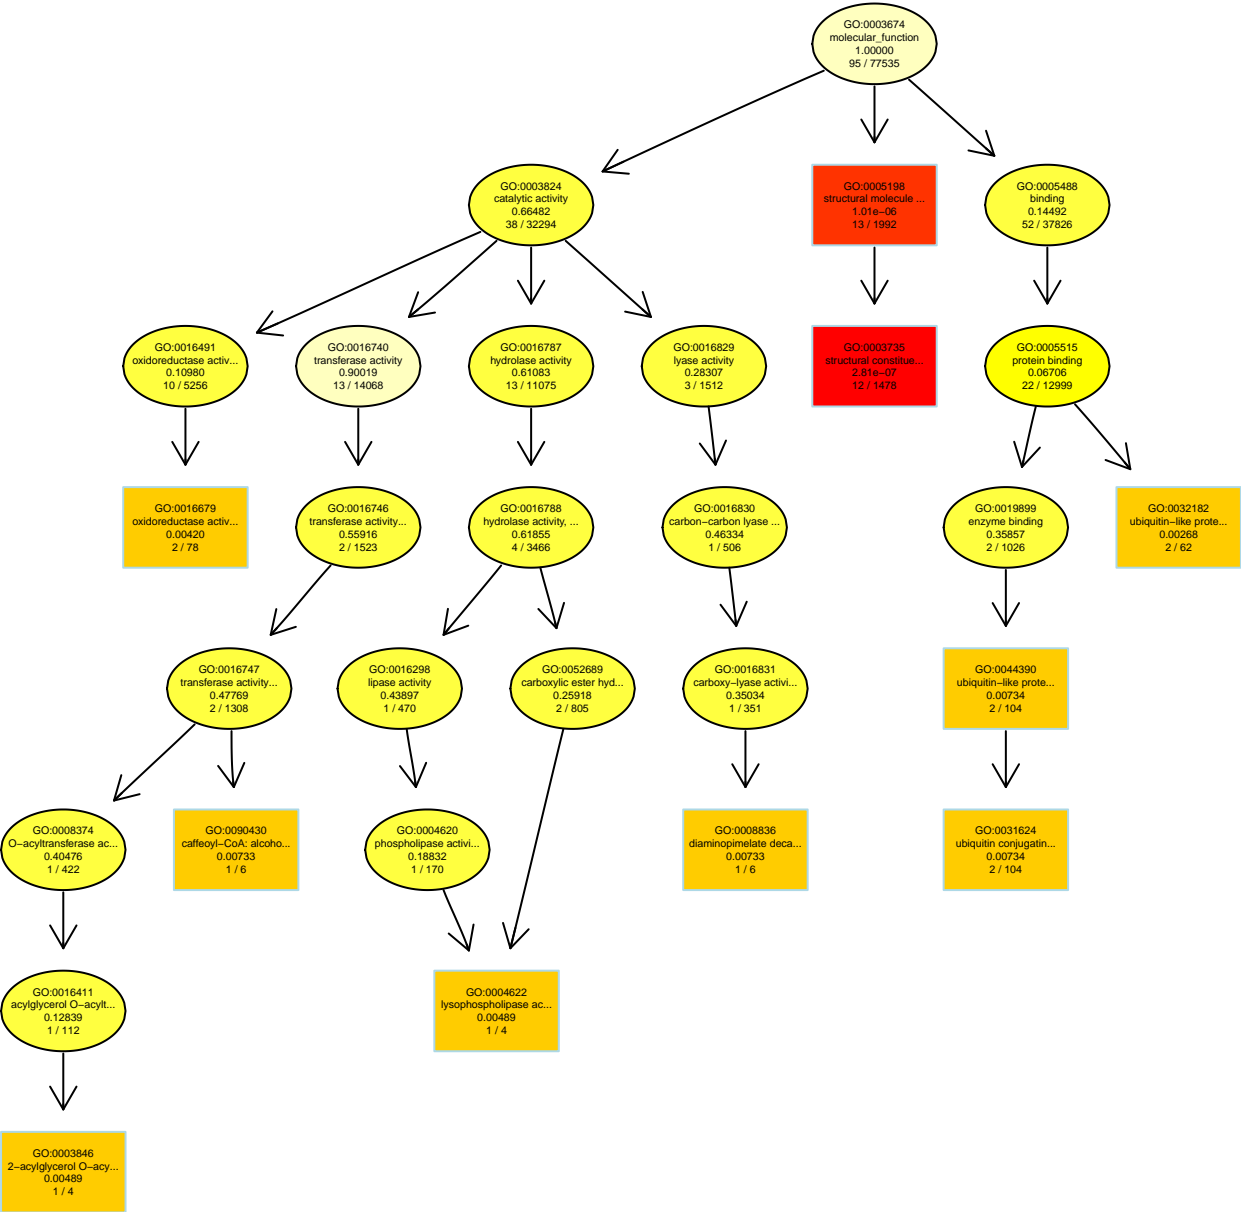

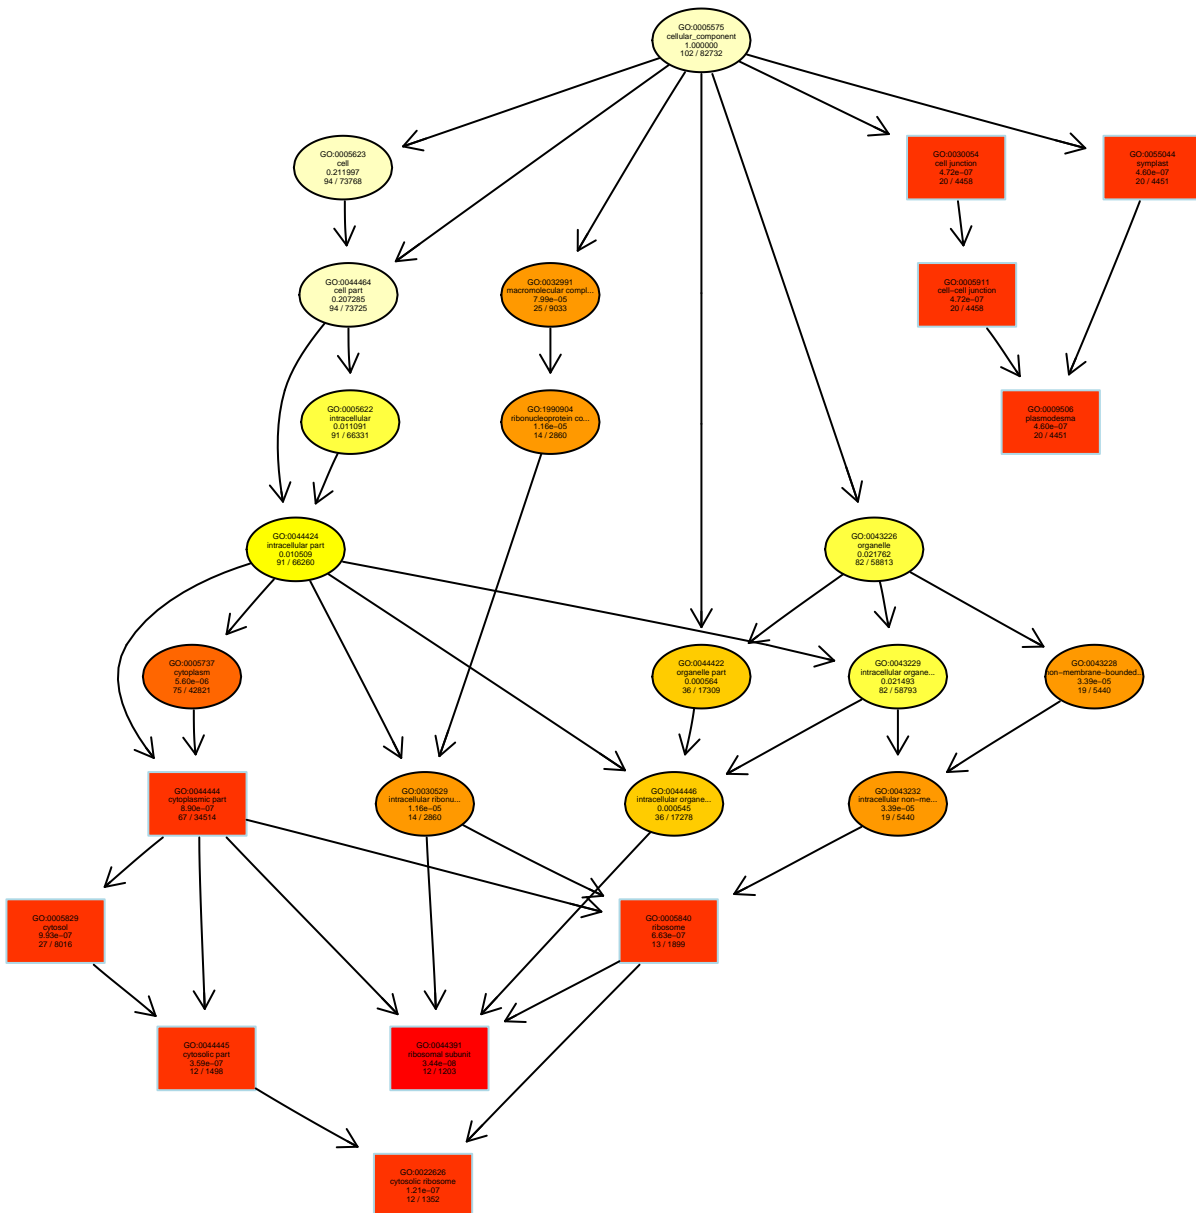

Supplement: s1 [file s1]

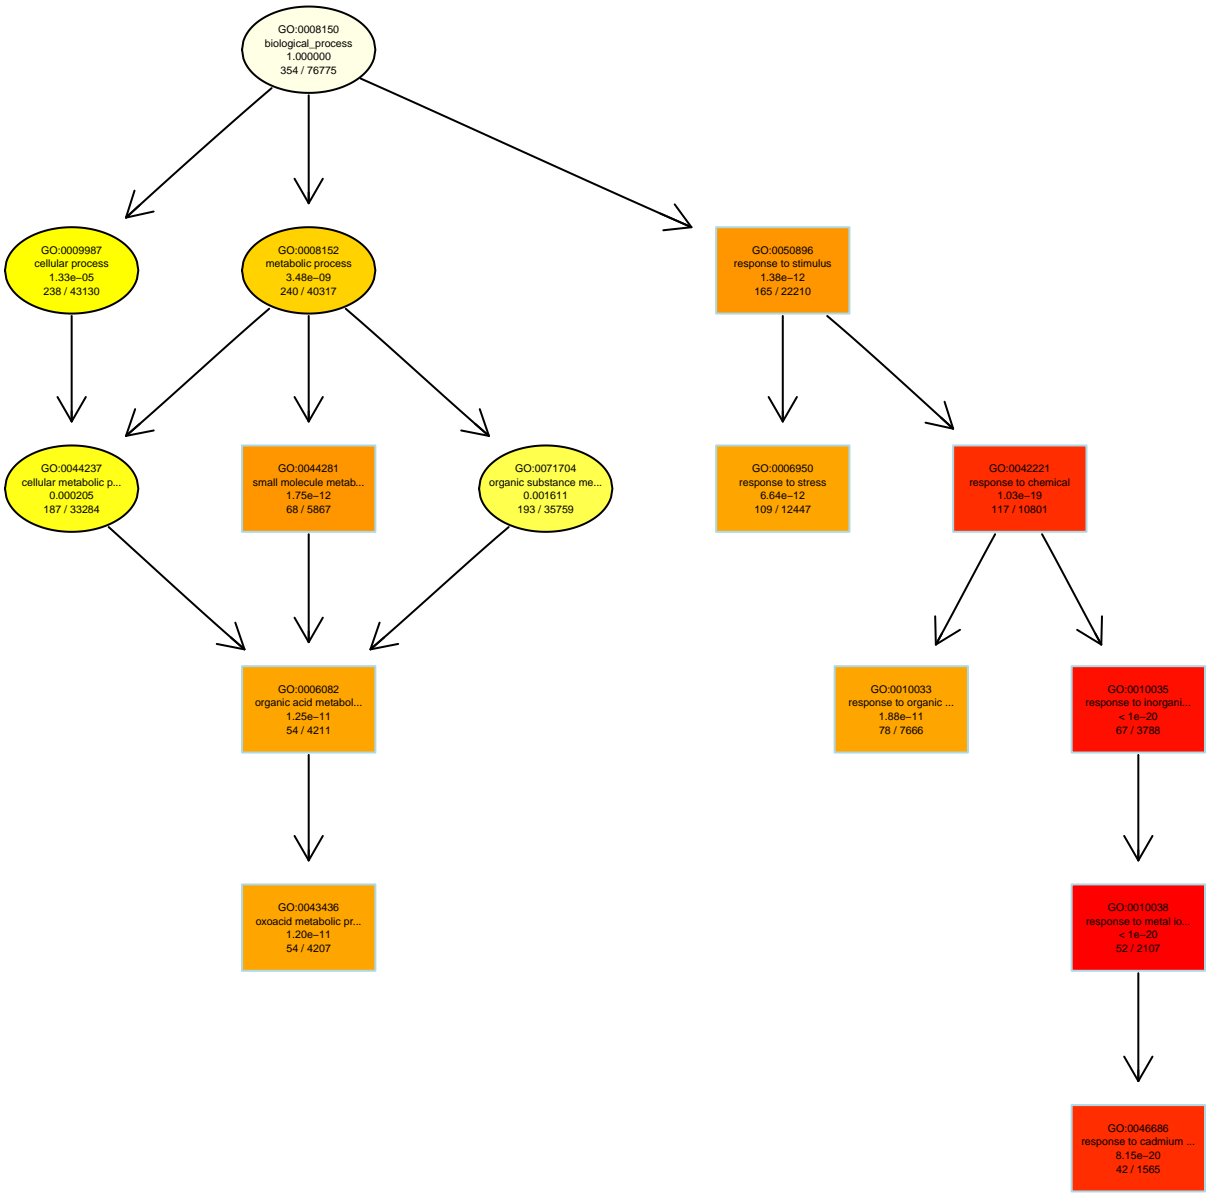

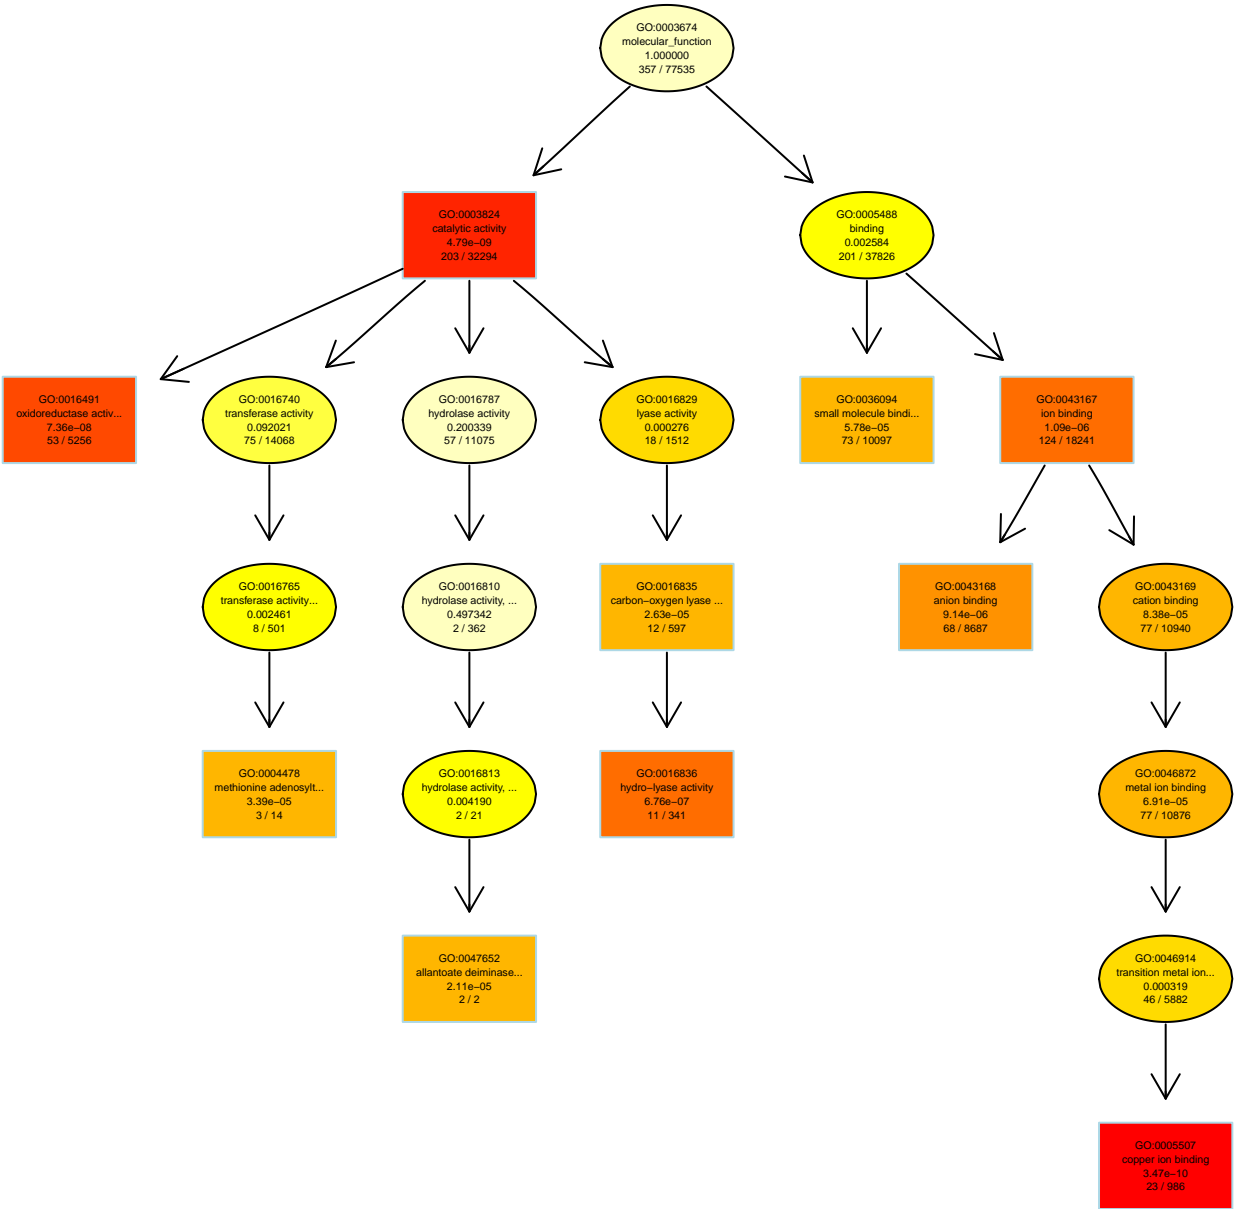

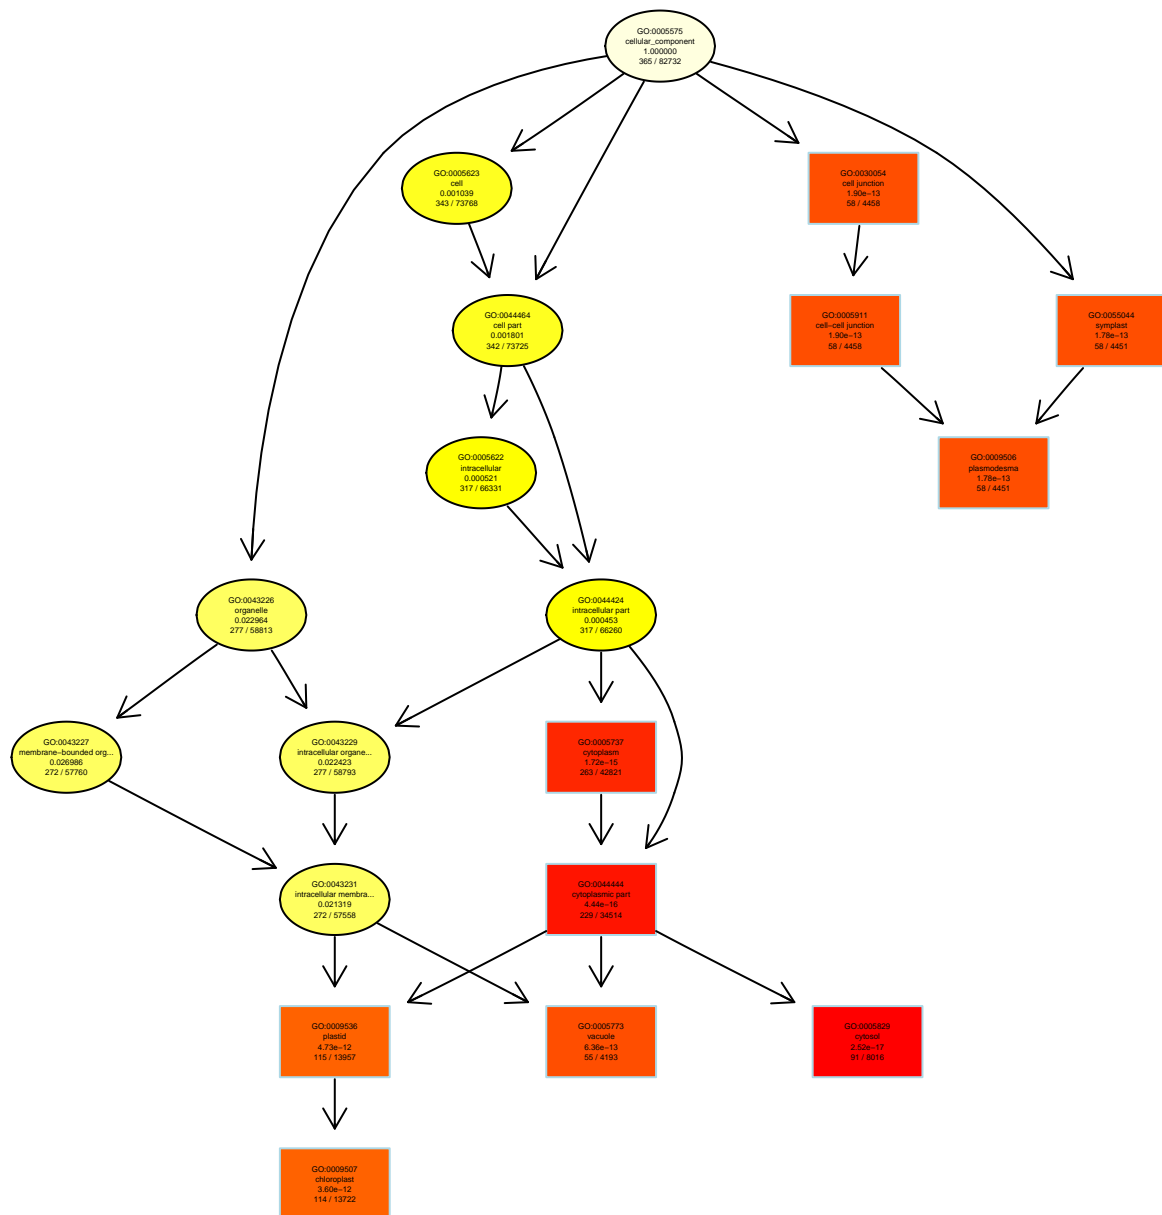

Supplement: s1 [file s1]

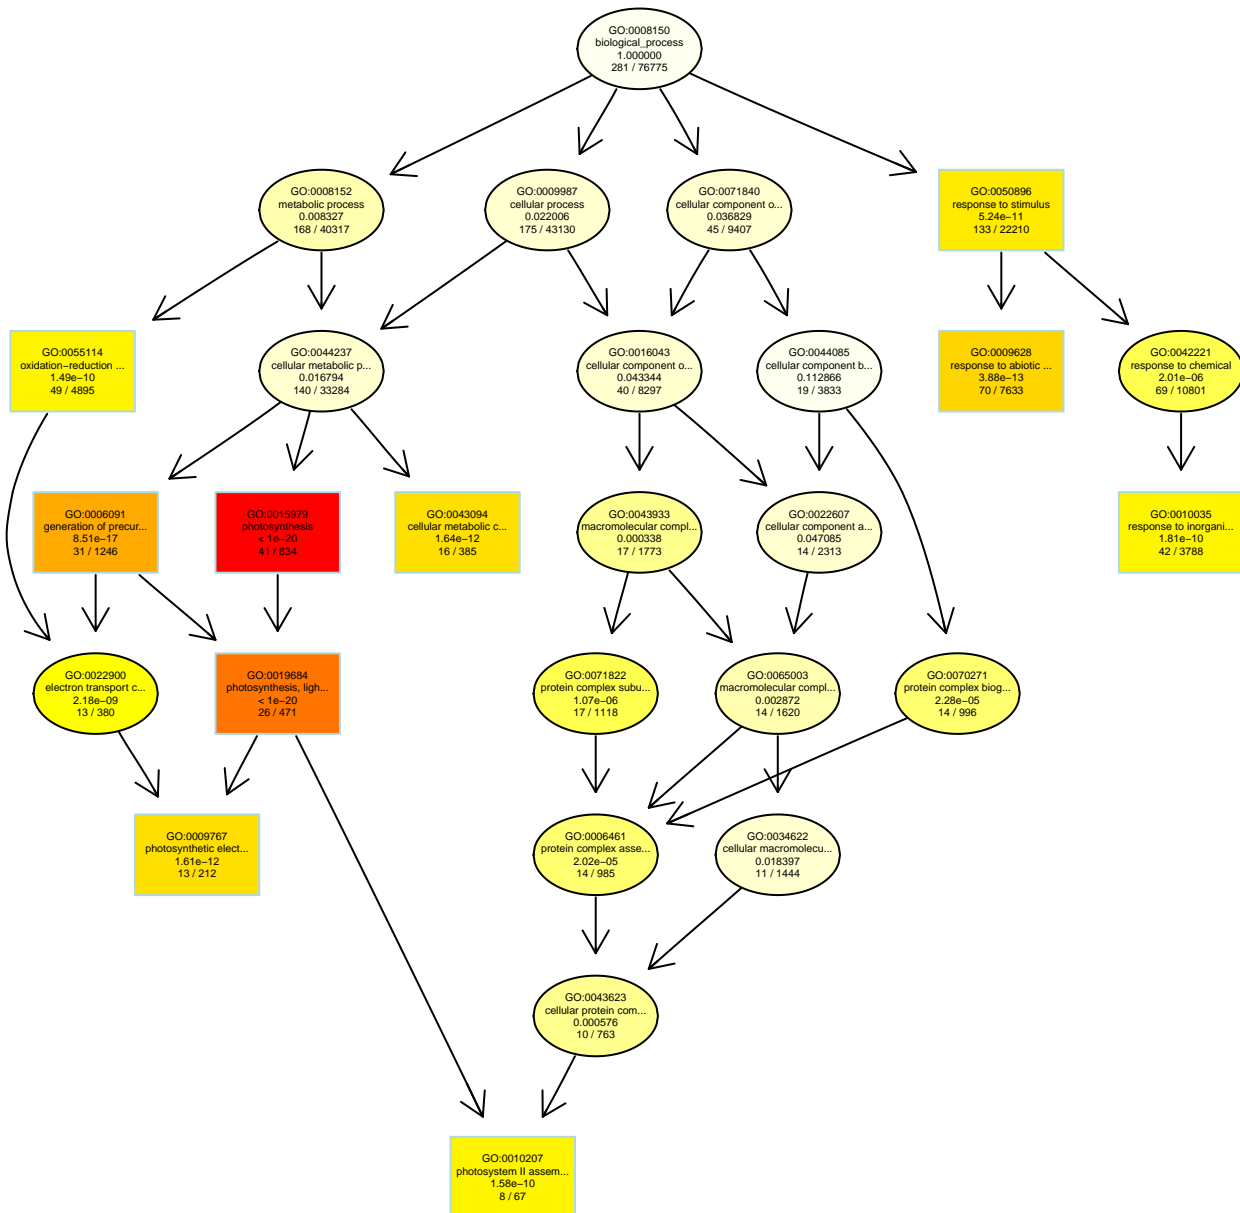

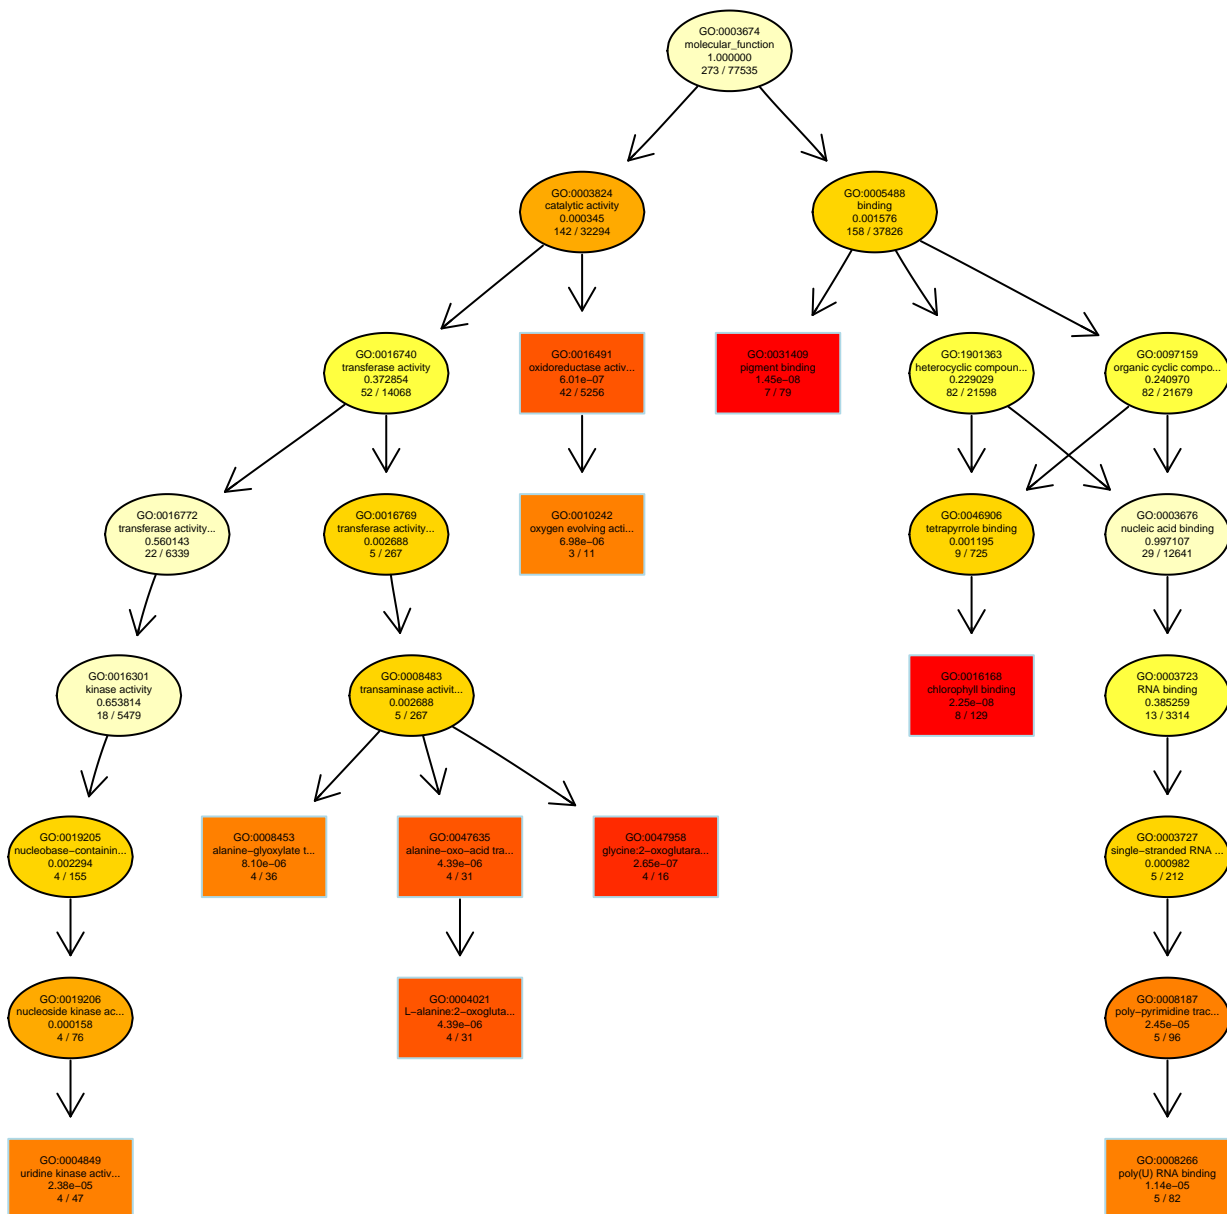

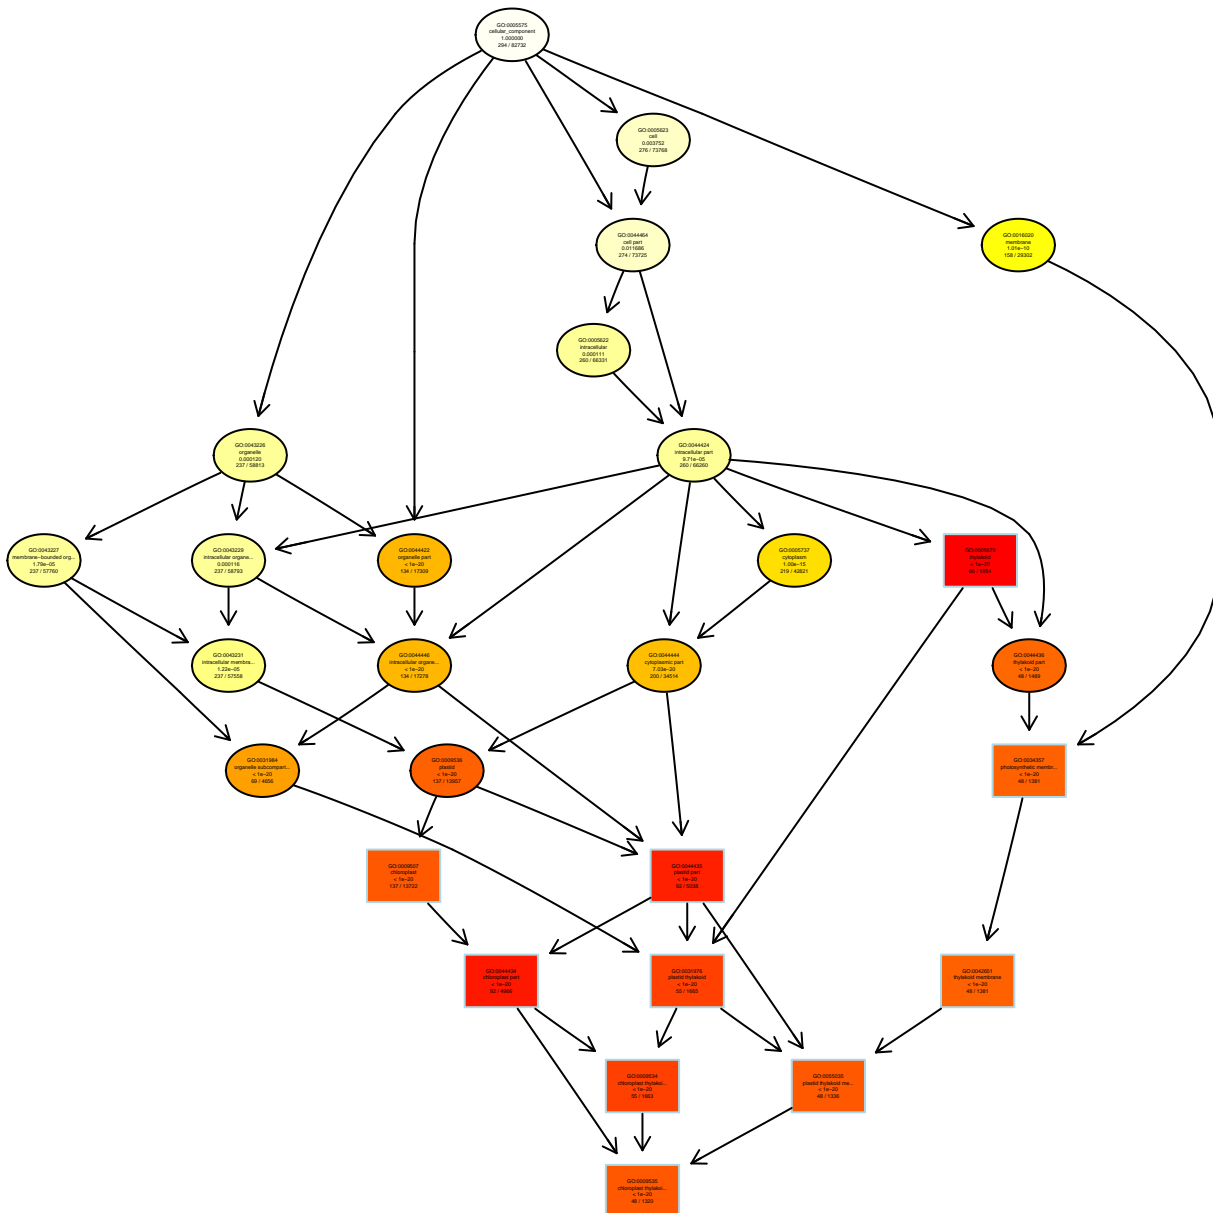

Supplement: s1 [file s1]

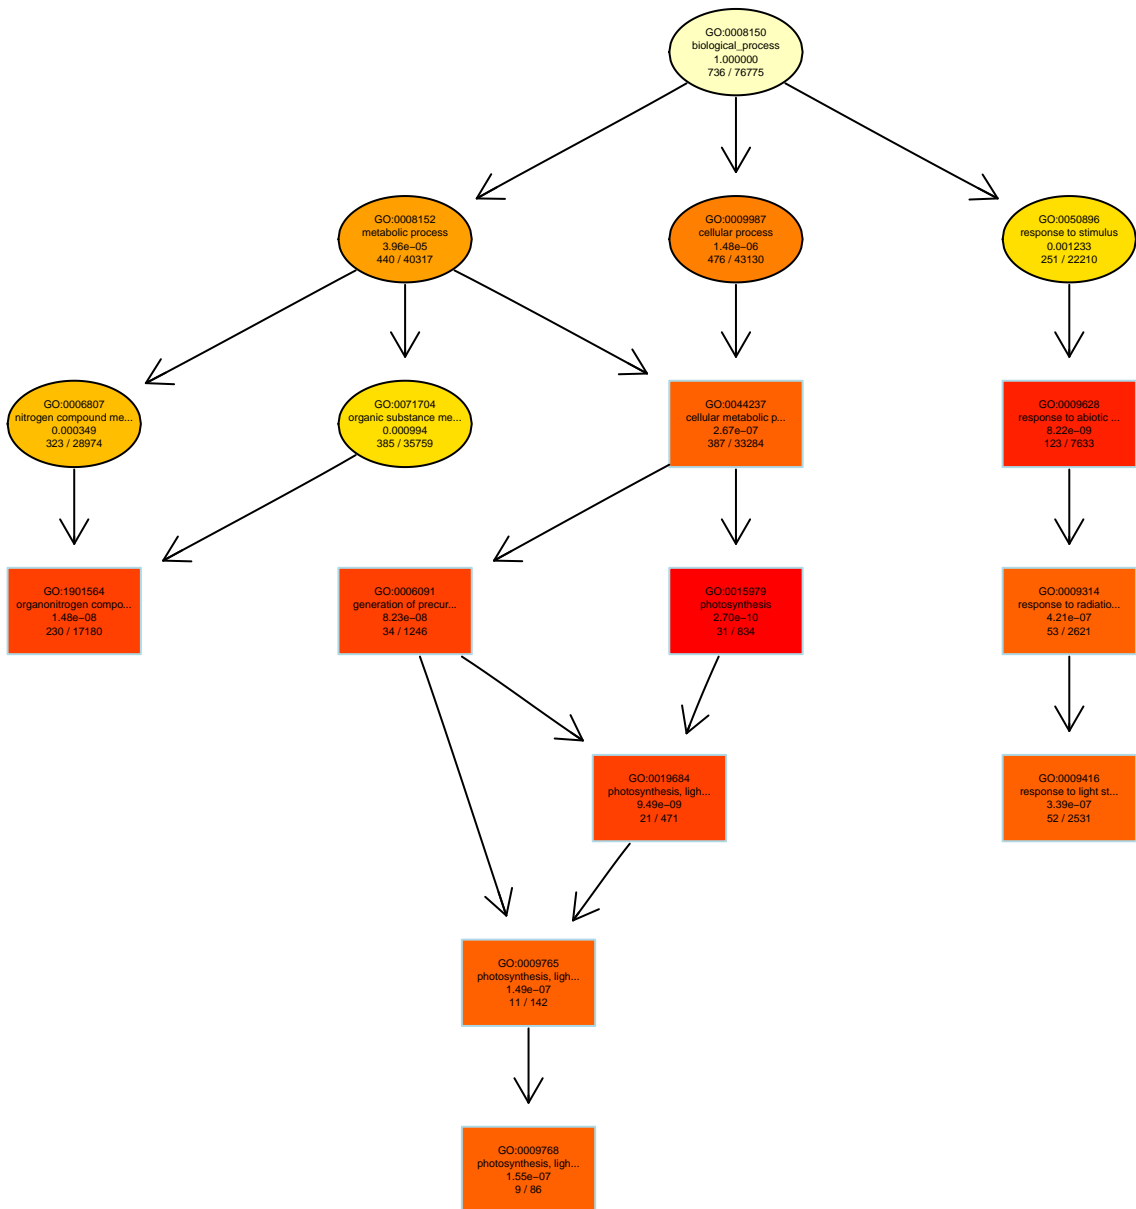

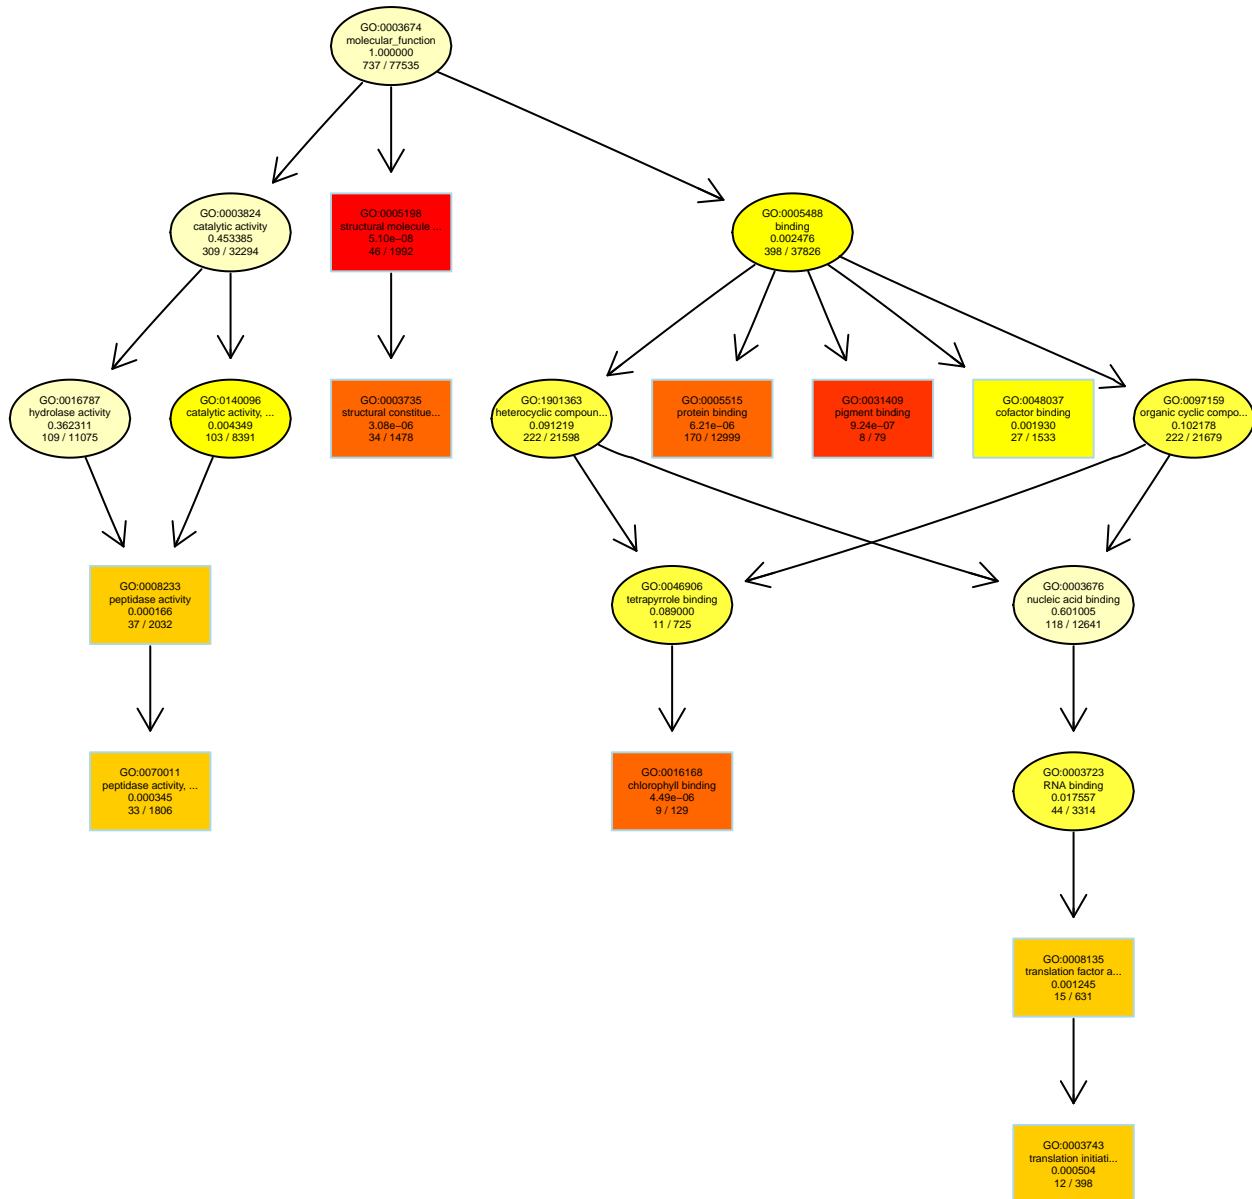

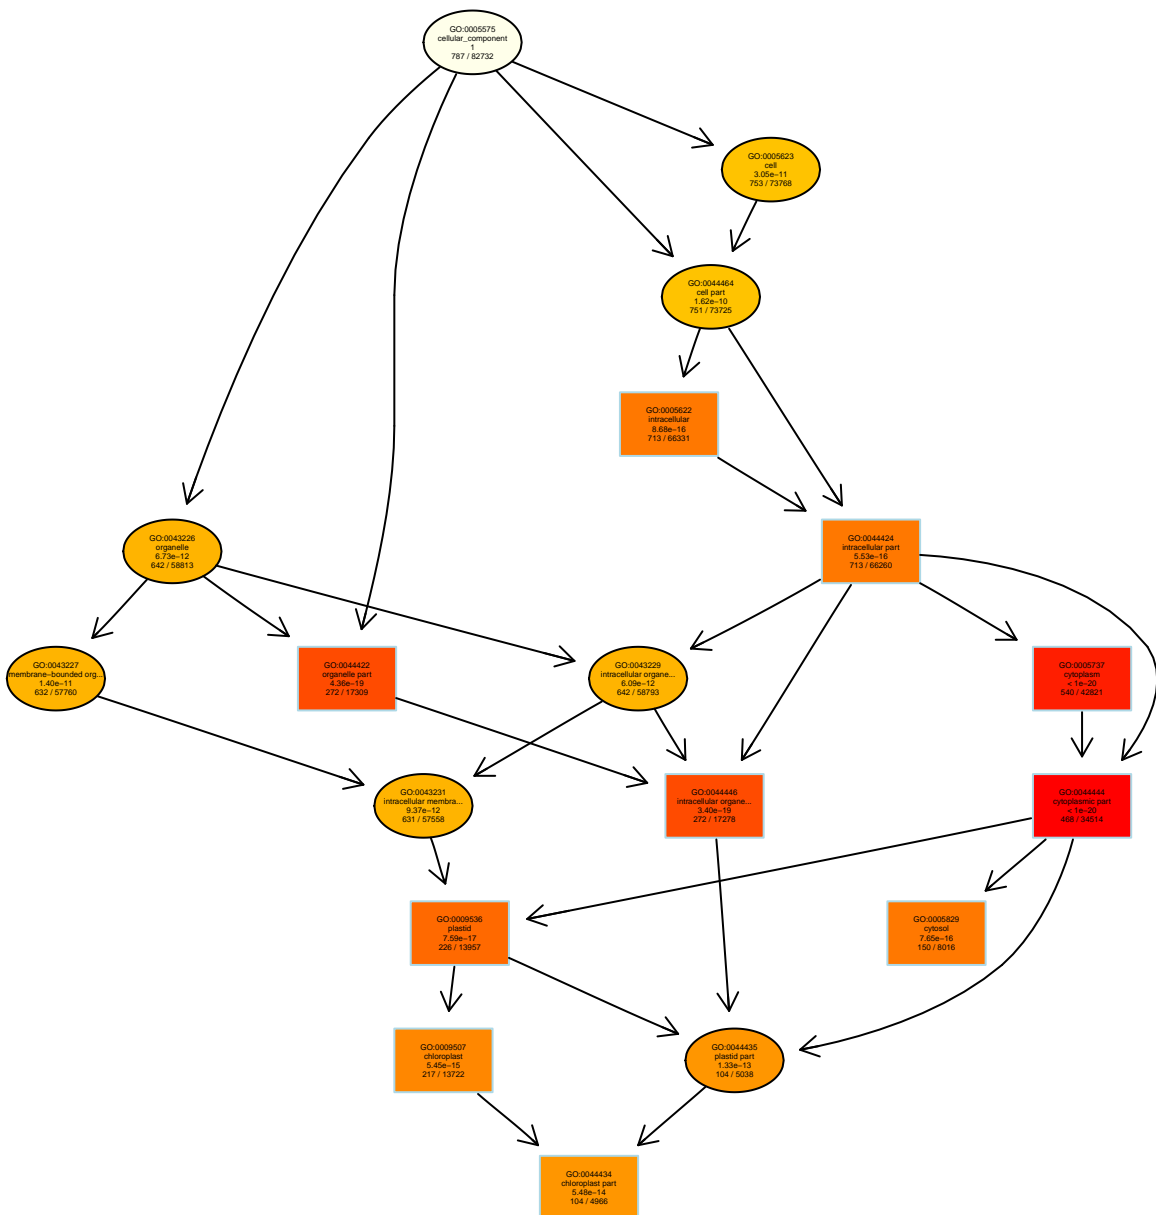

Supplement: s1 [file s1]

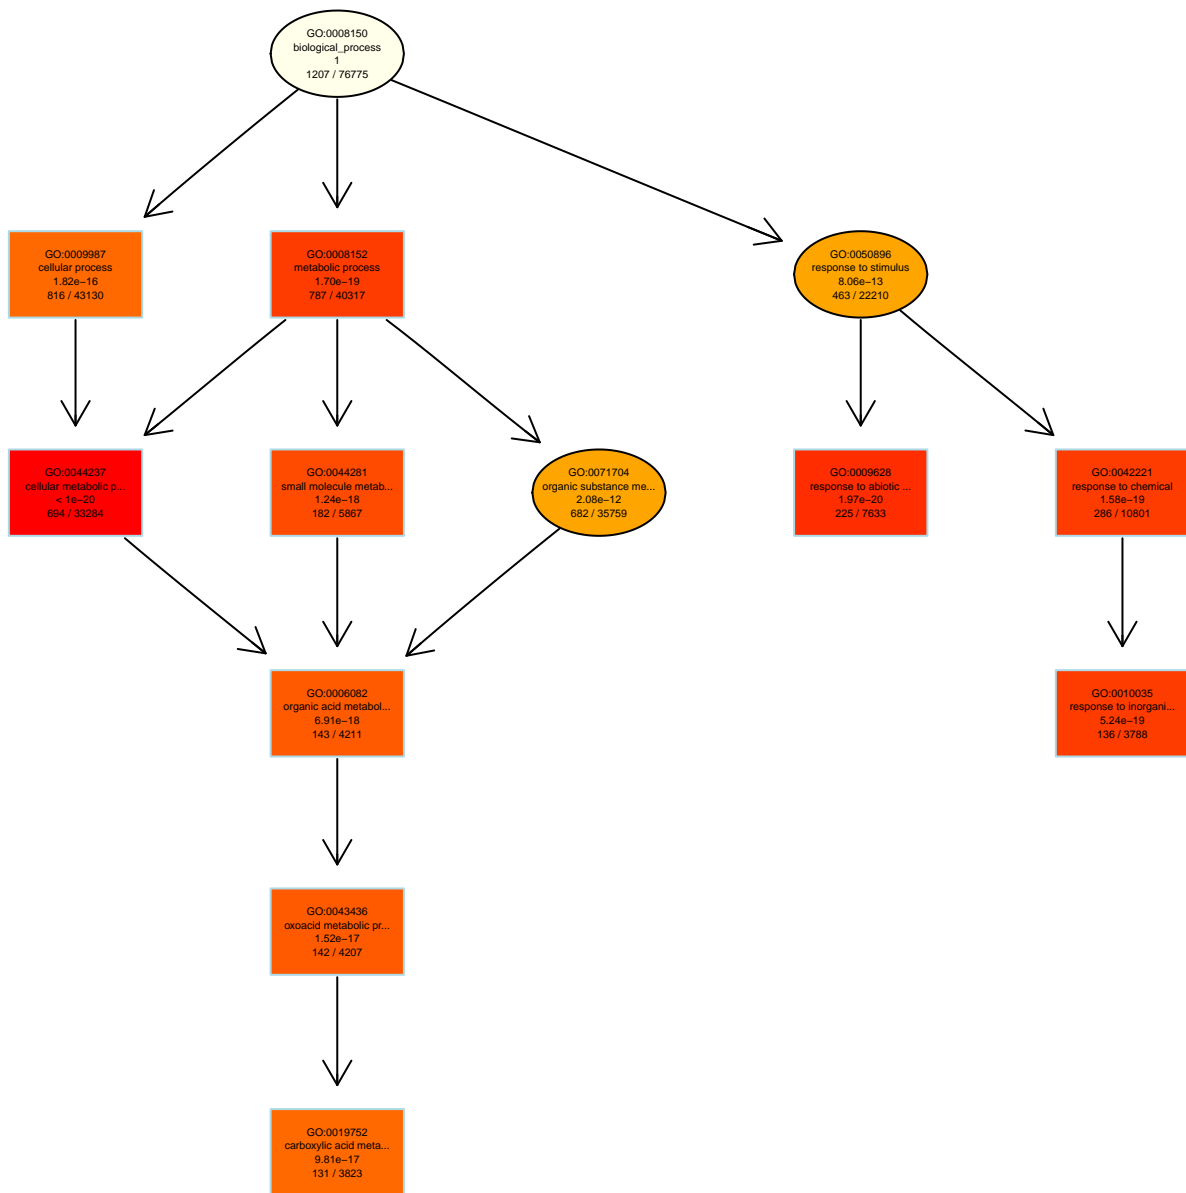

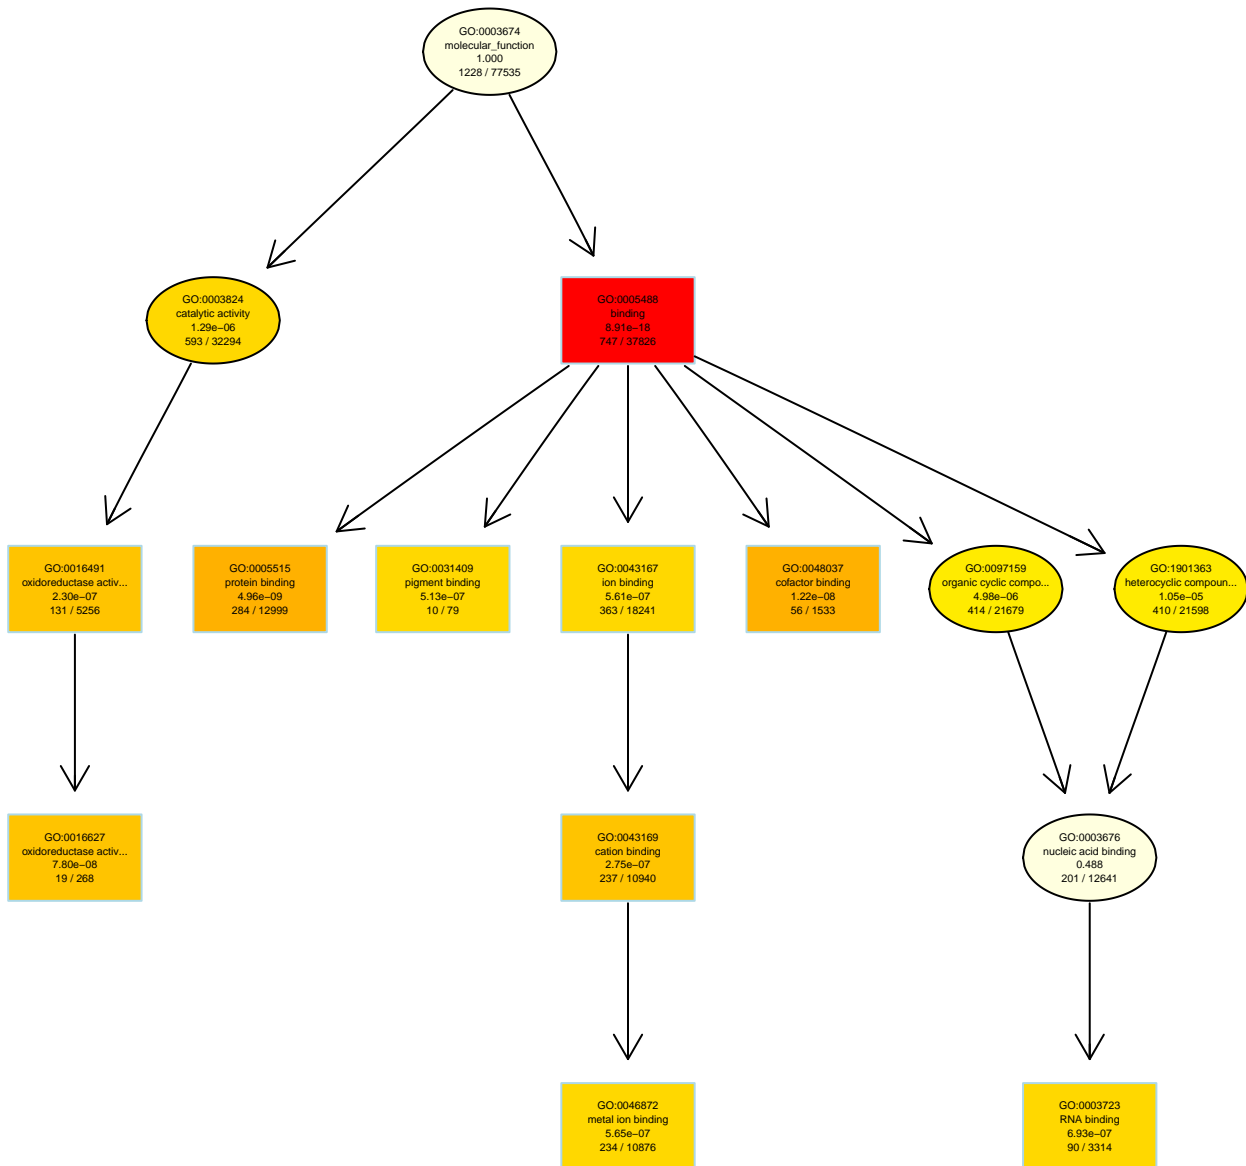

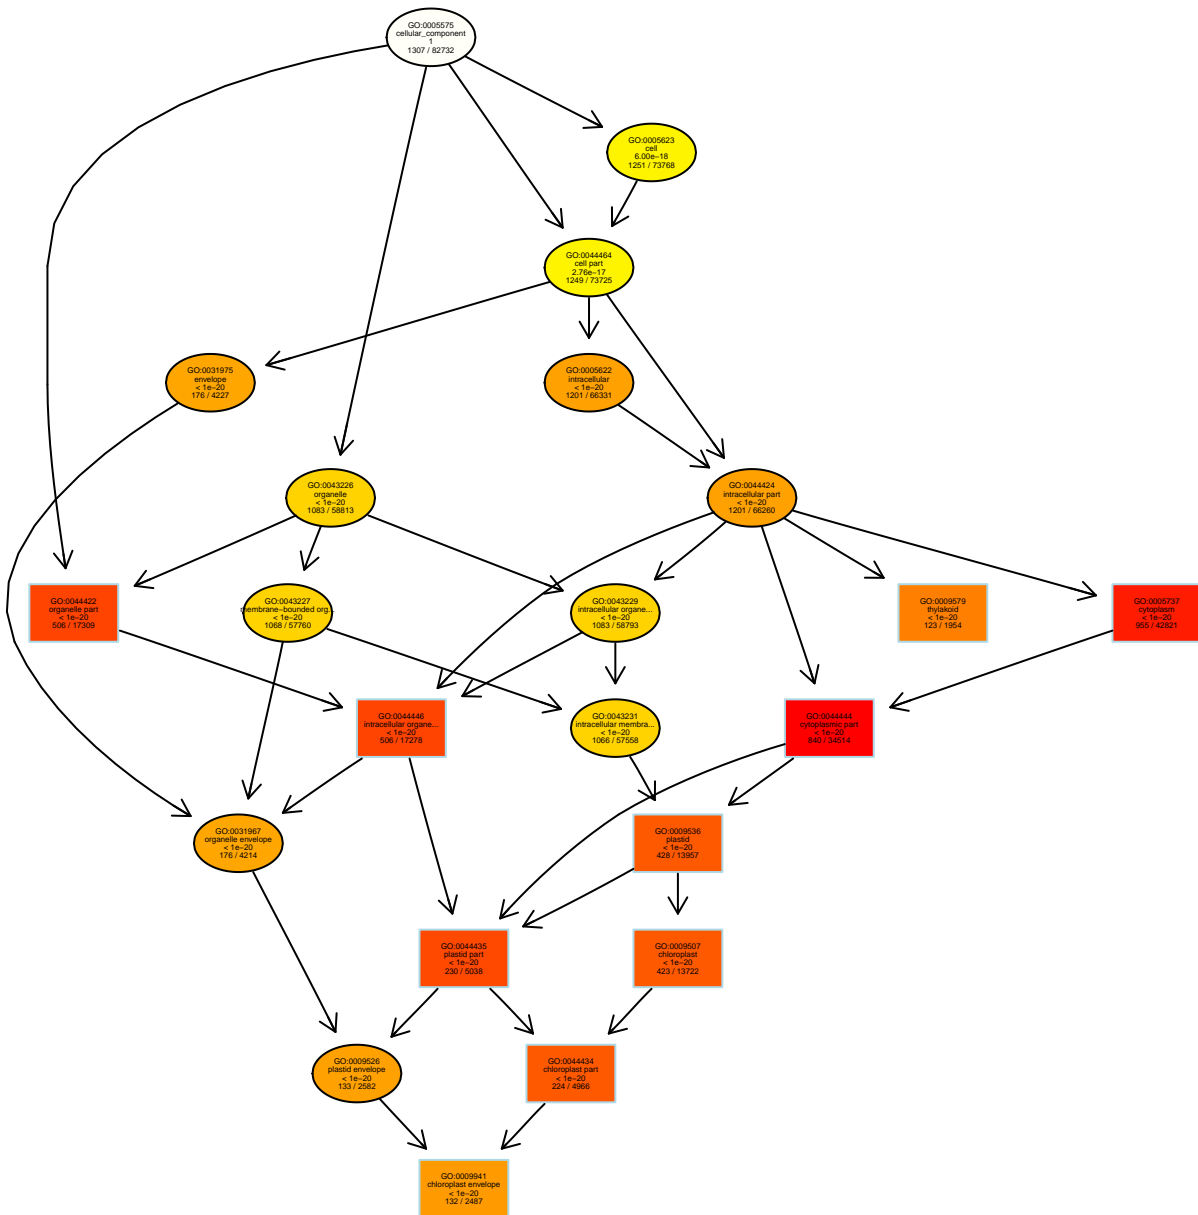

Supplement: s1 [file s1]

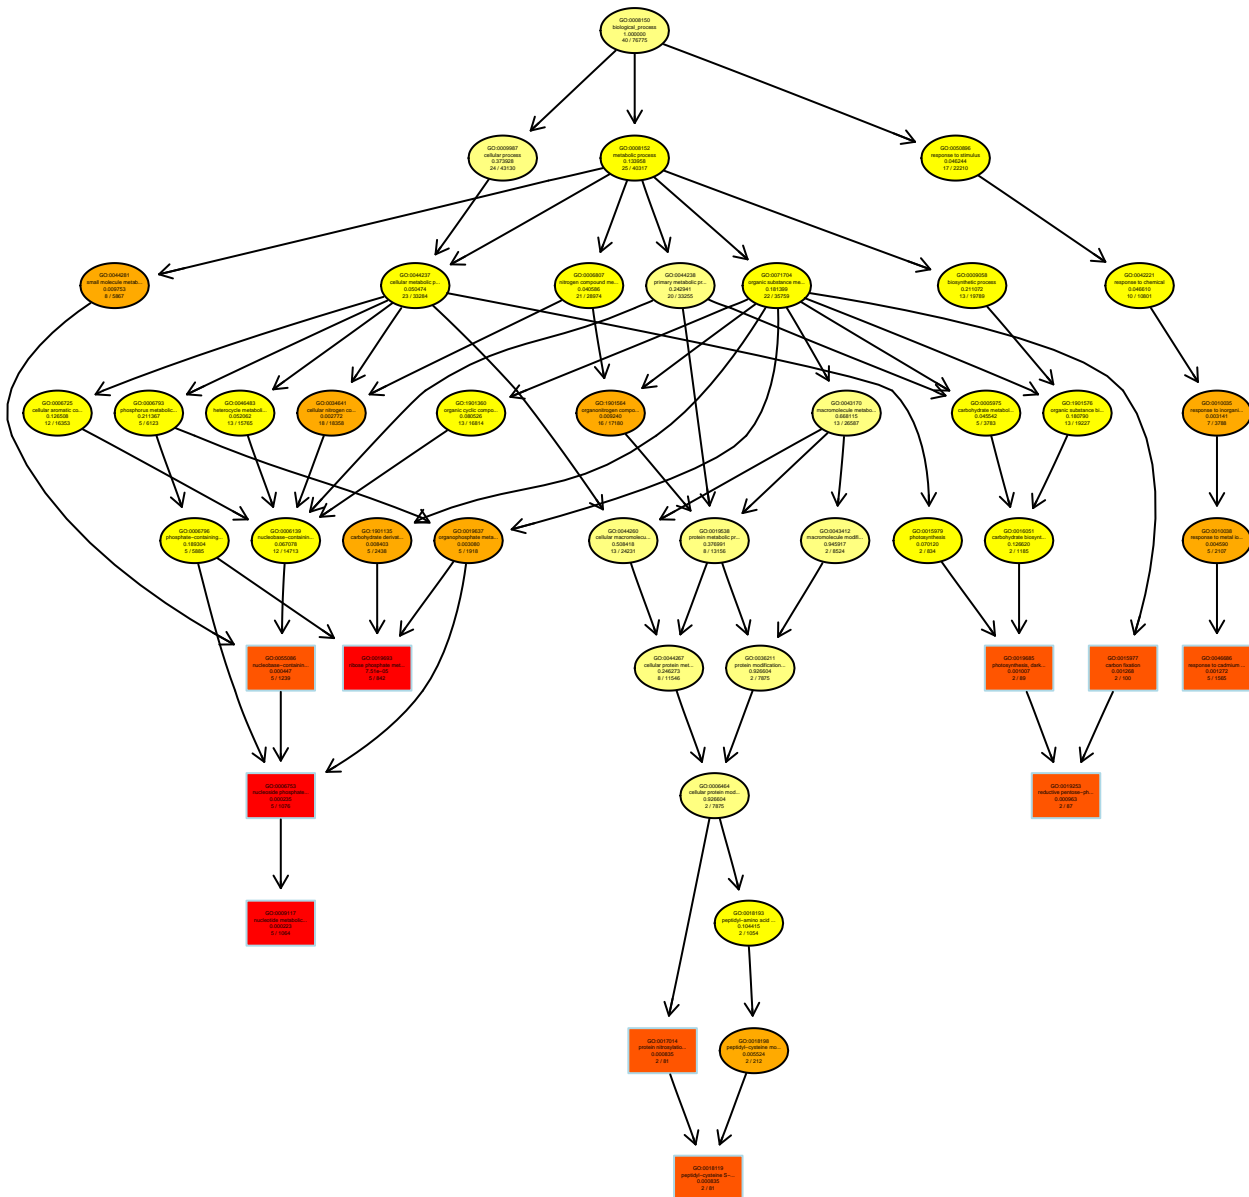

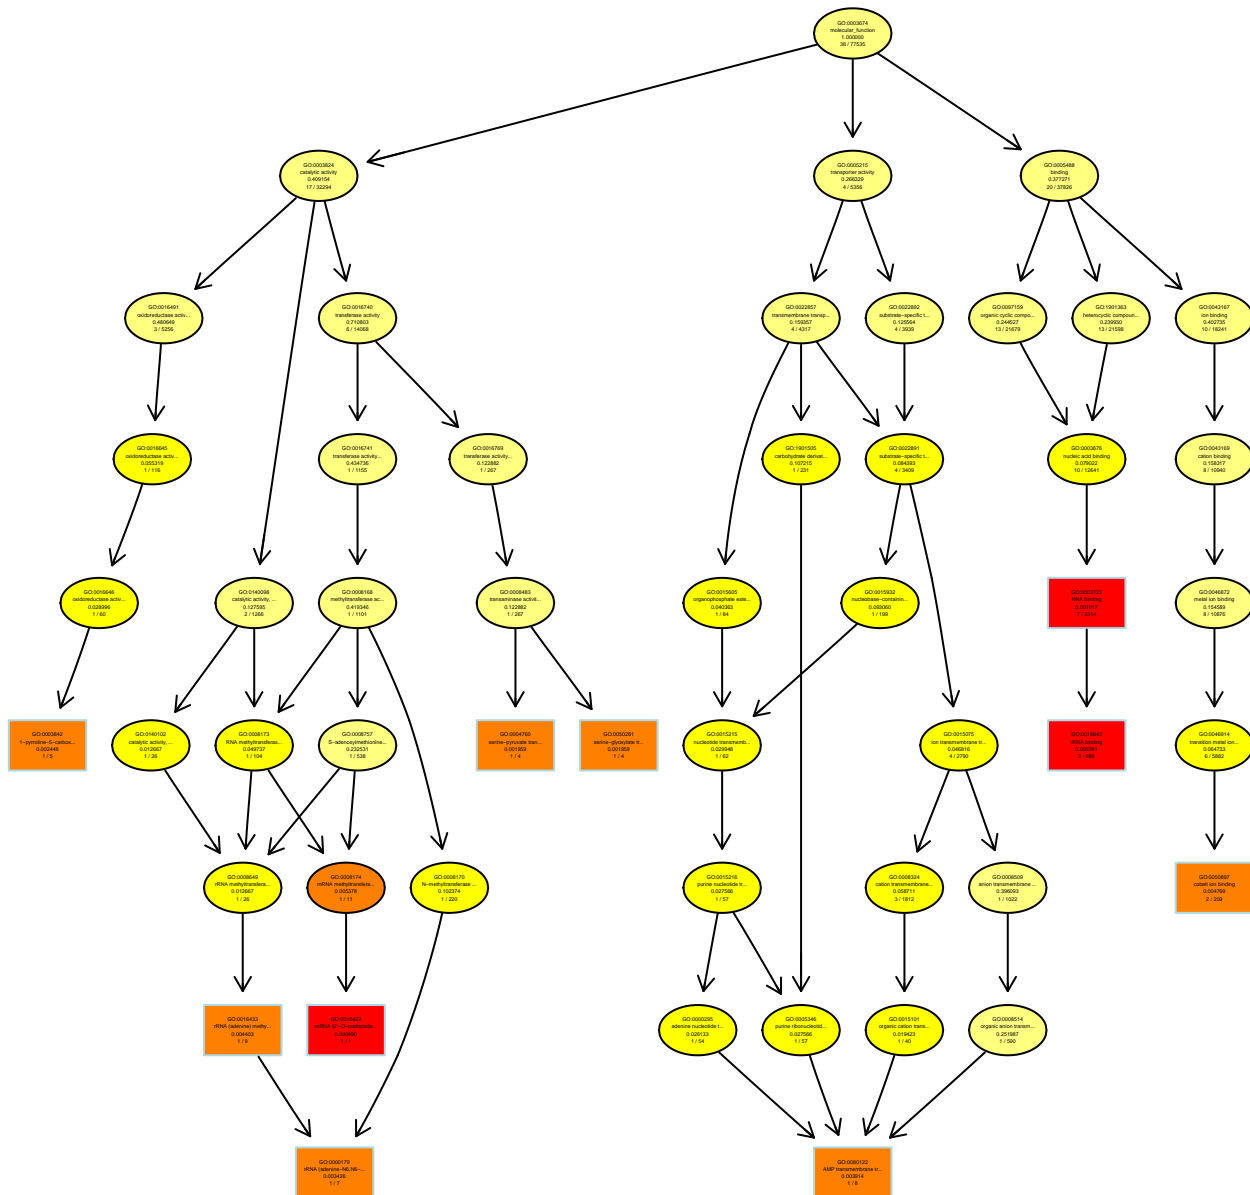

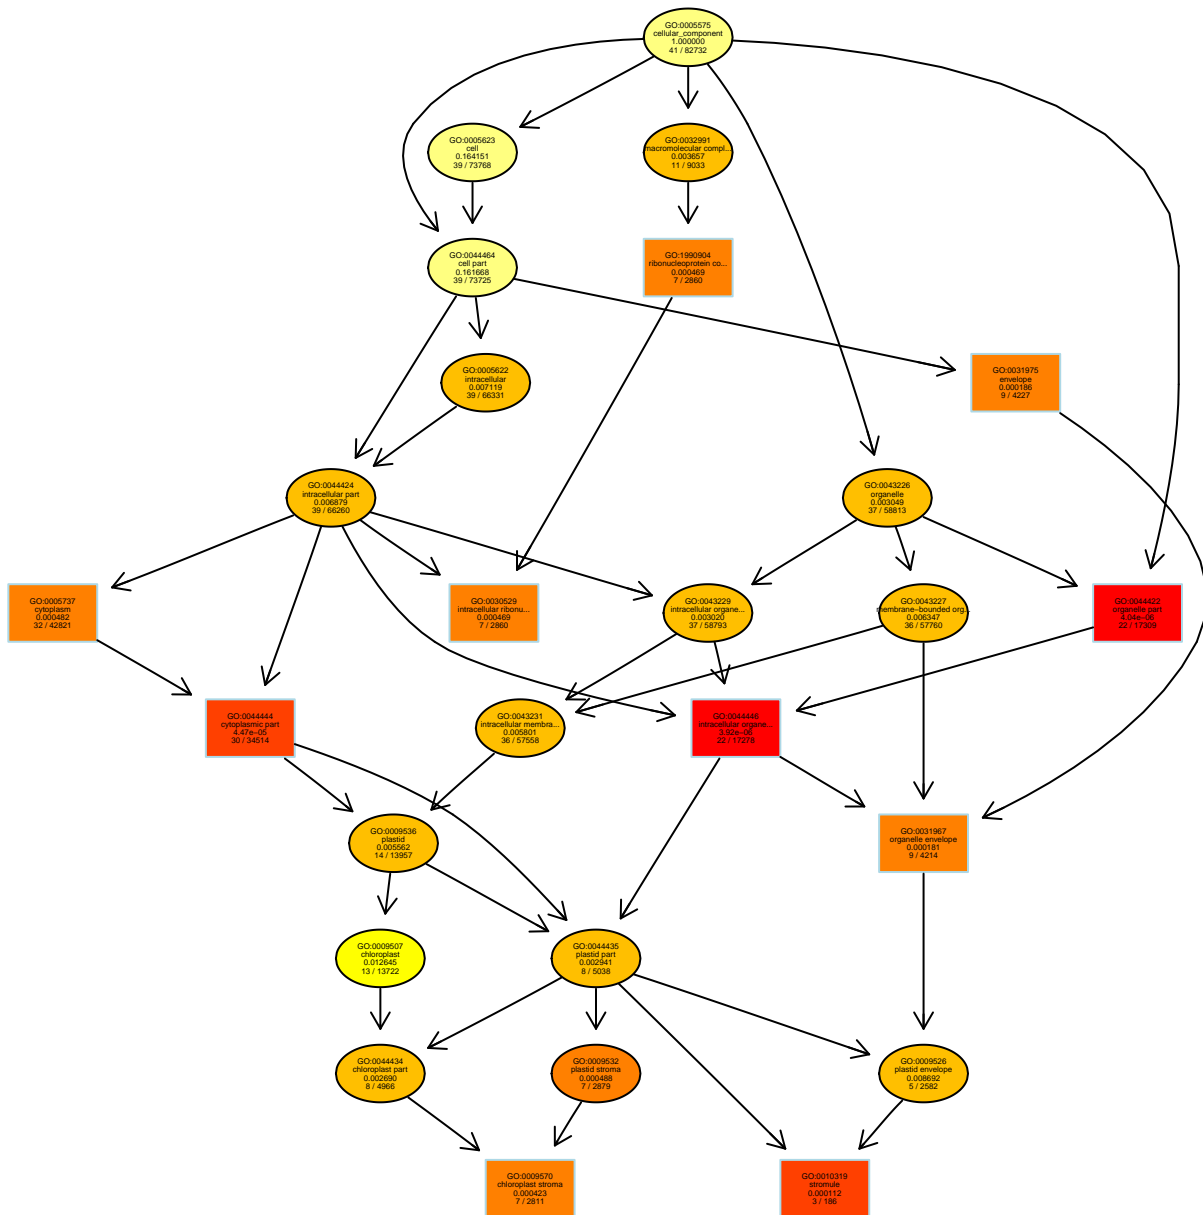

Supplement: s1 [file s1]

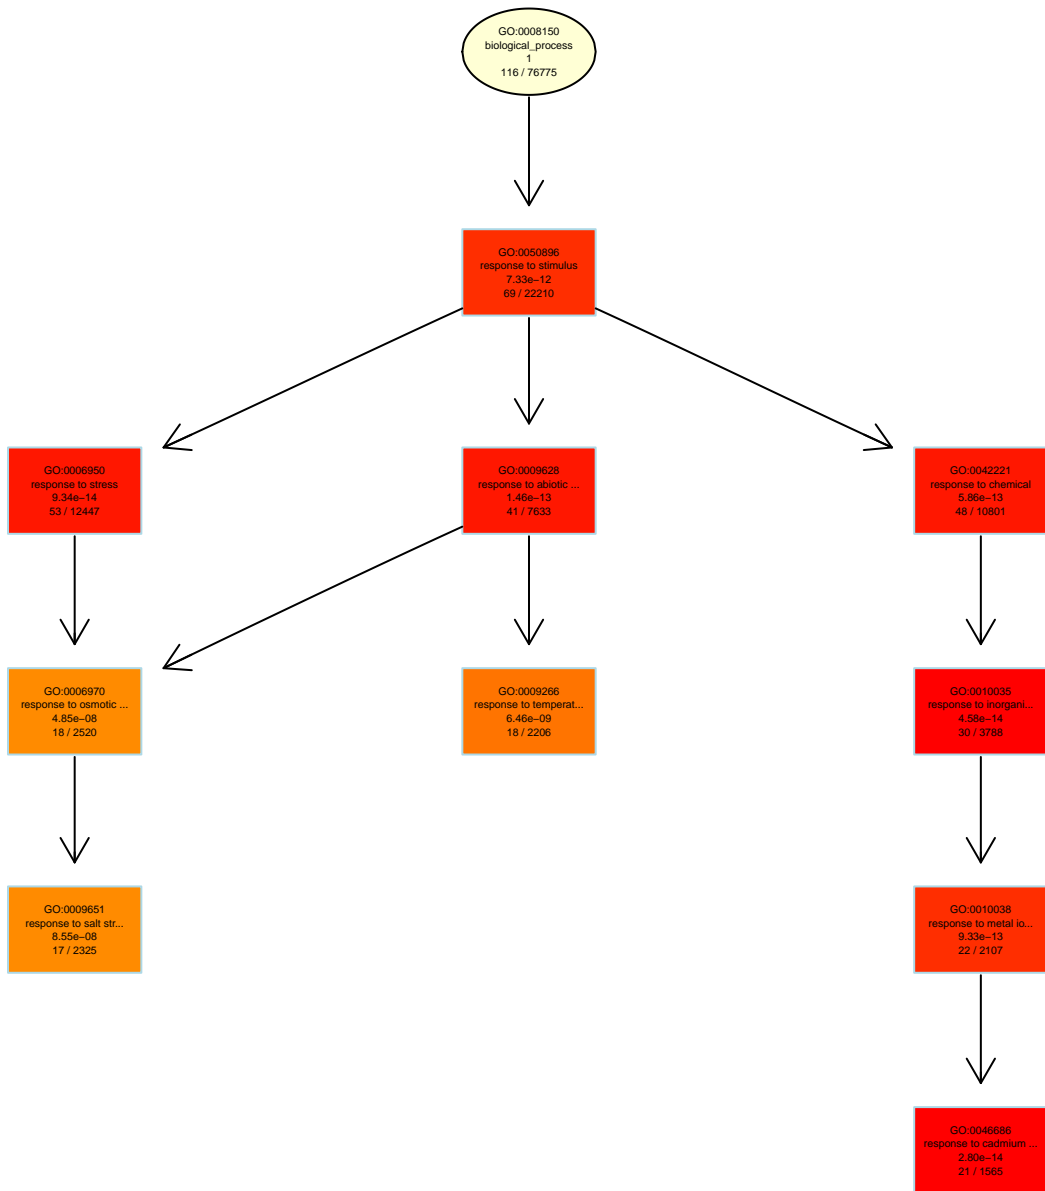

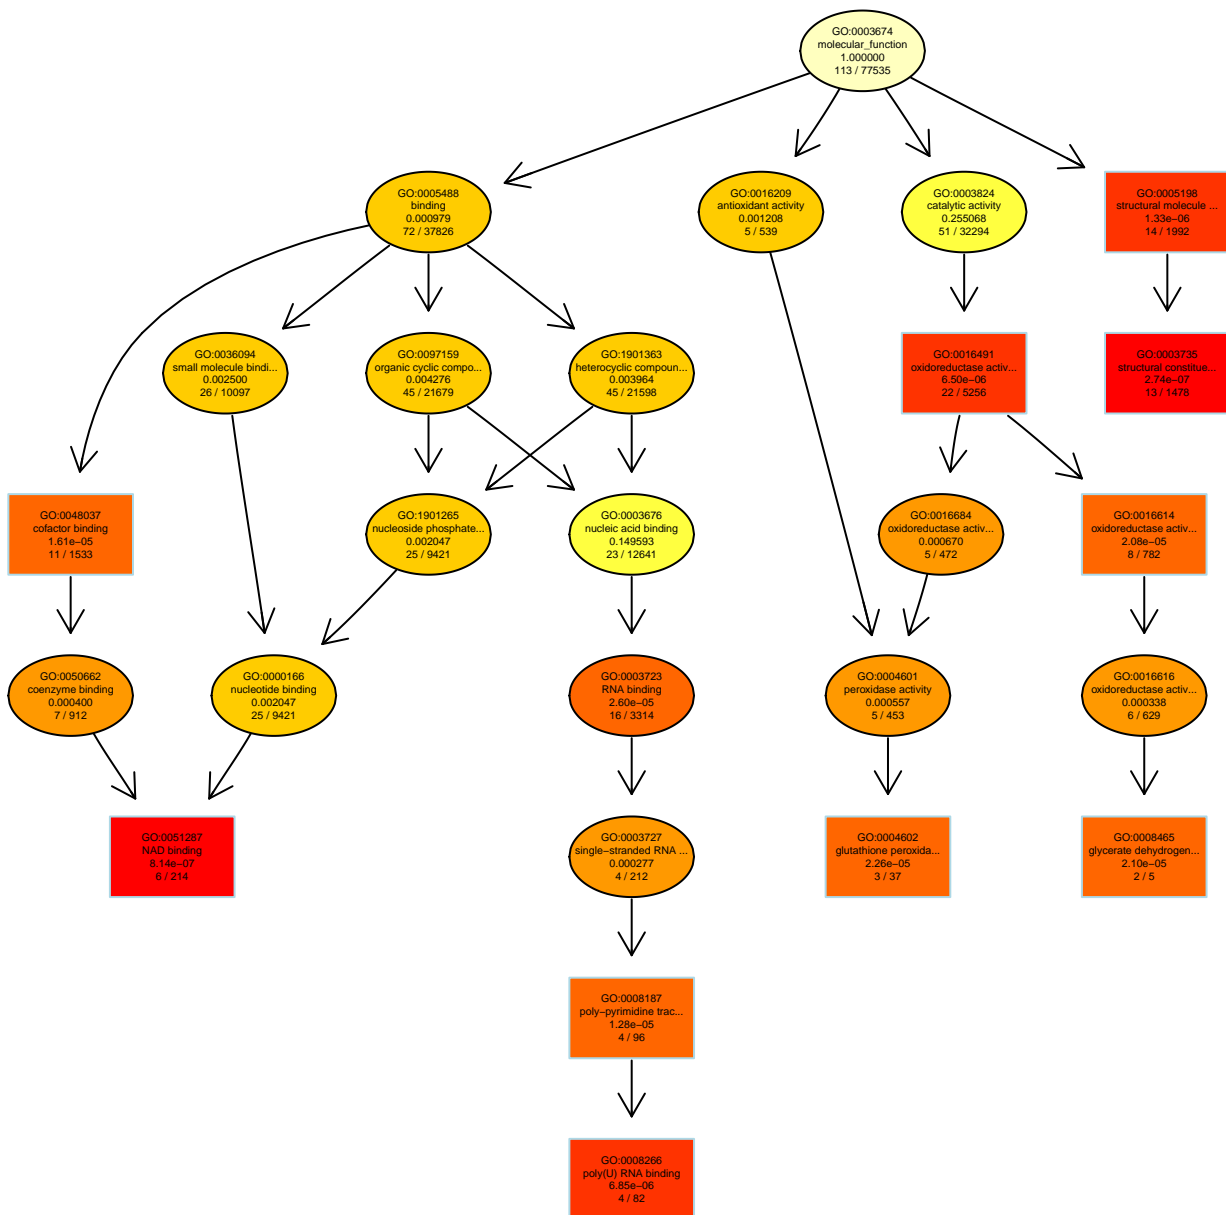

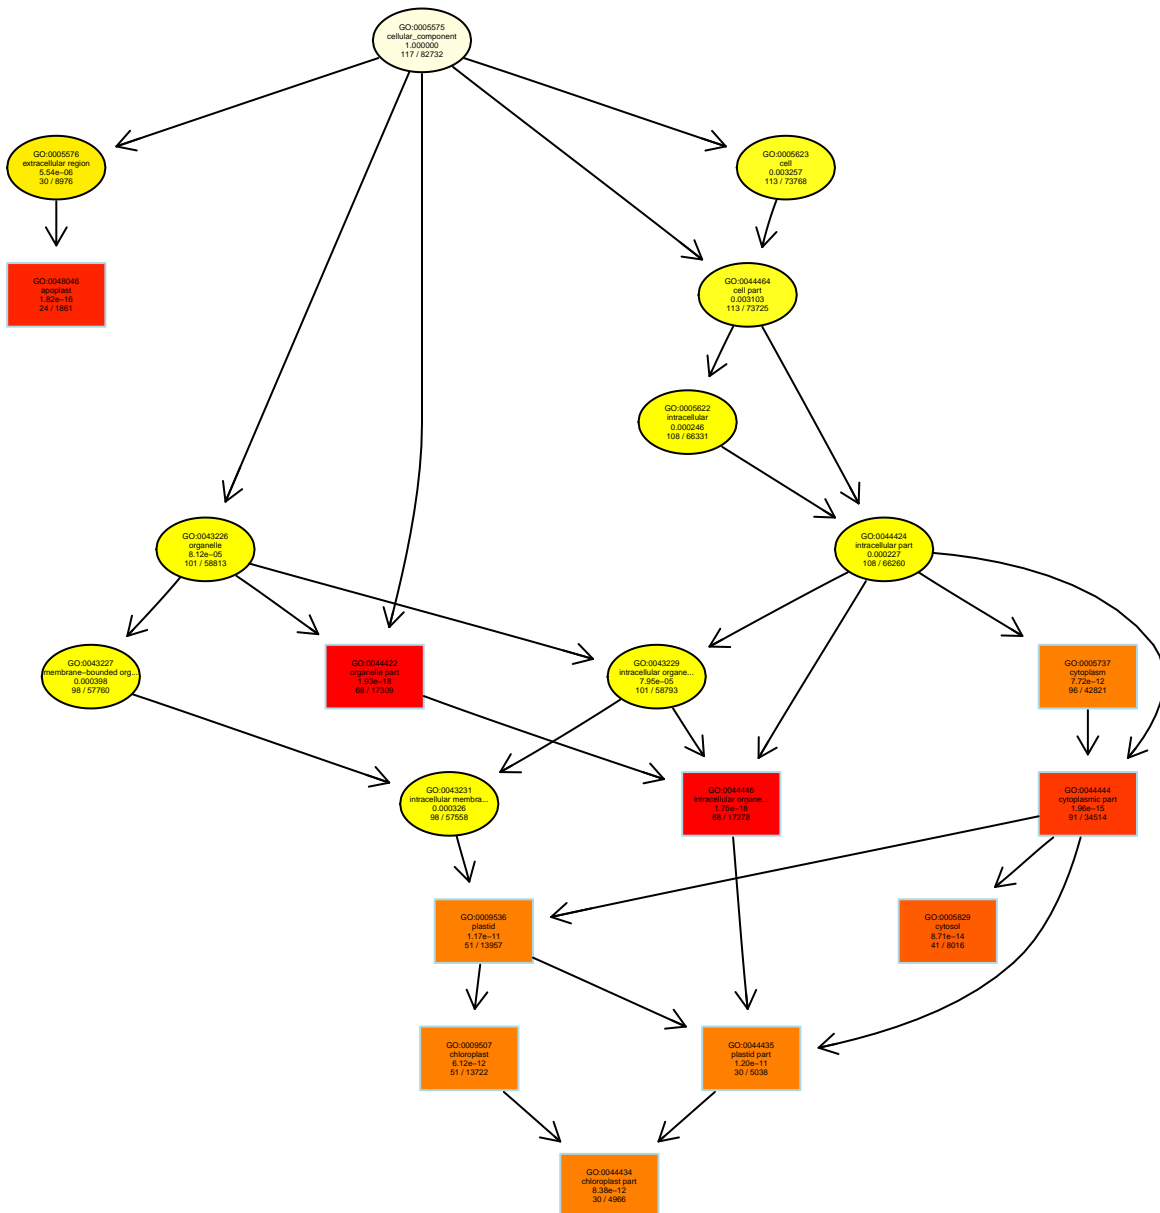

Supplement: s1 [file s1]

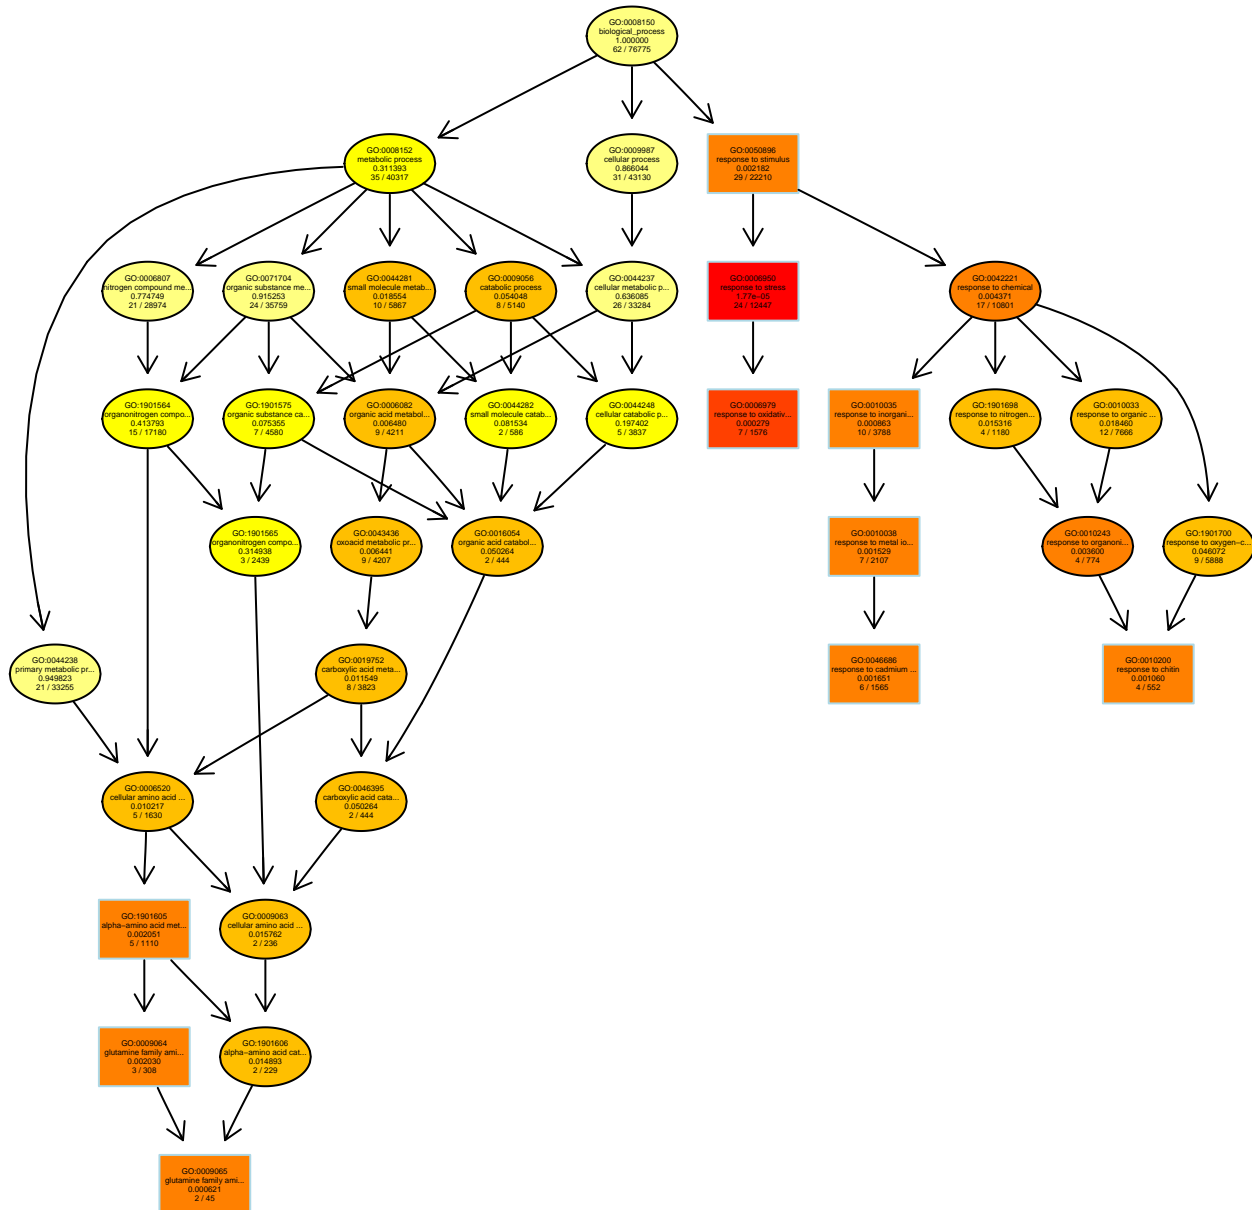

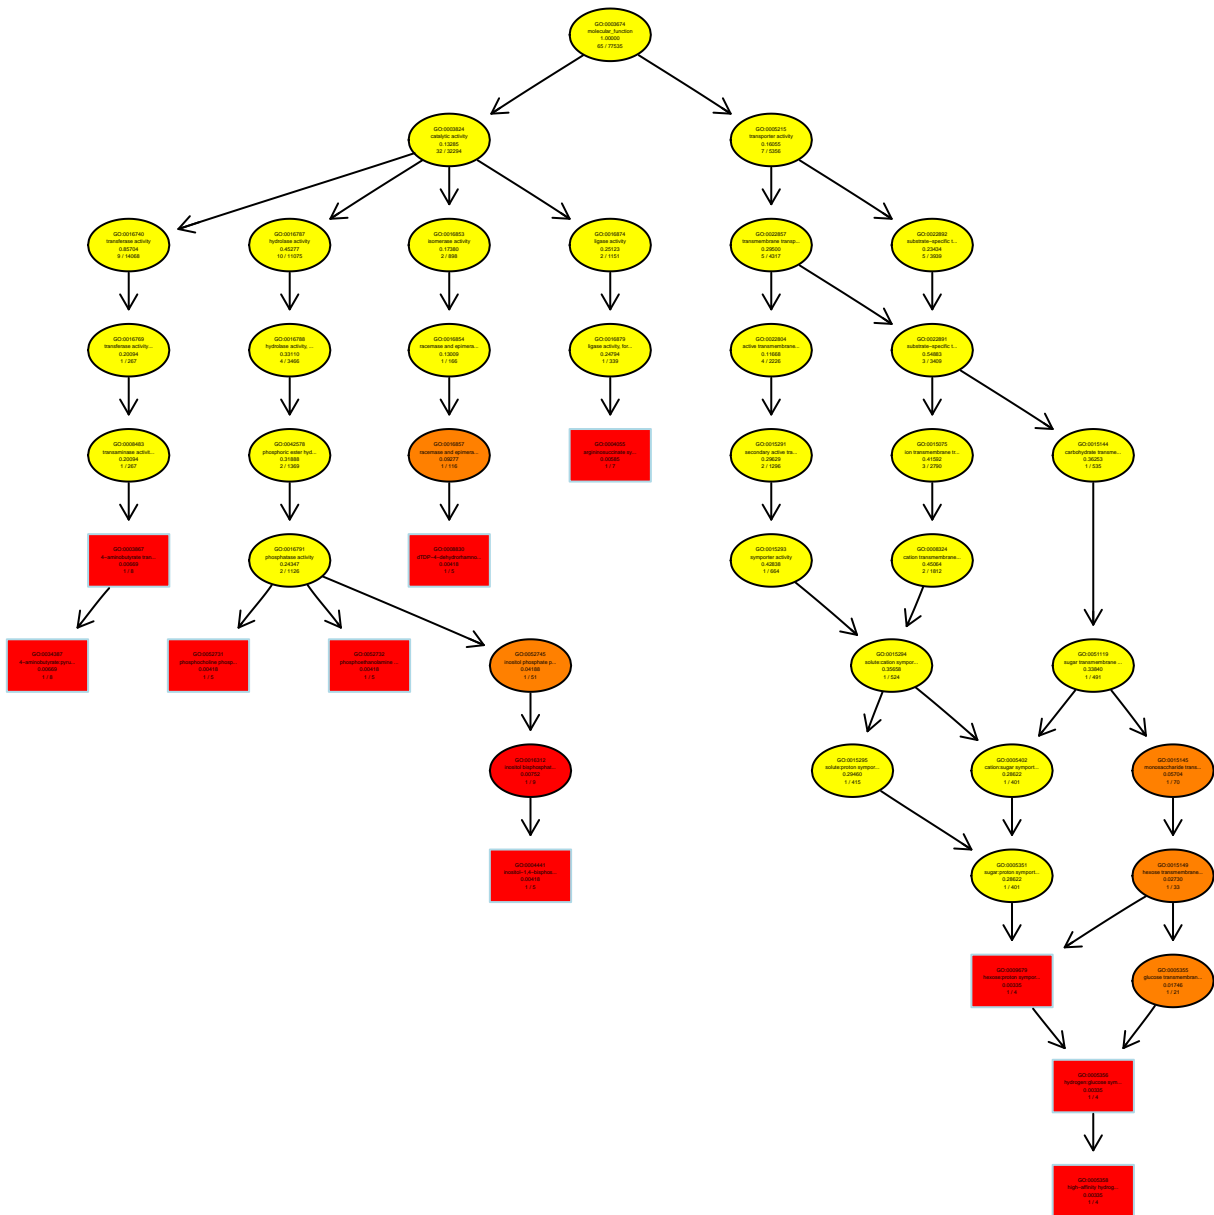

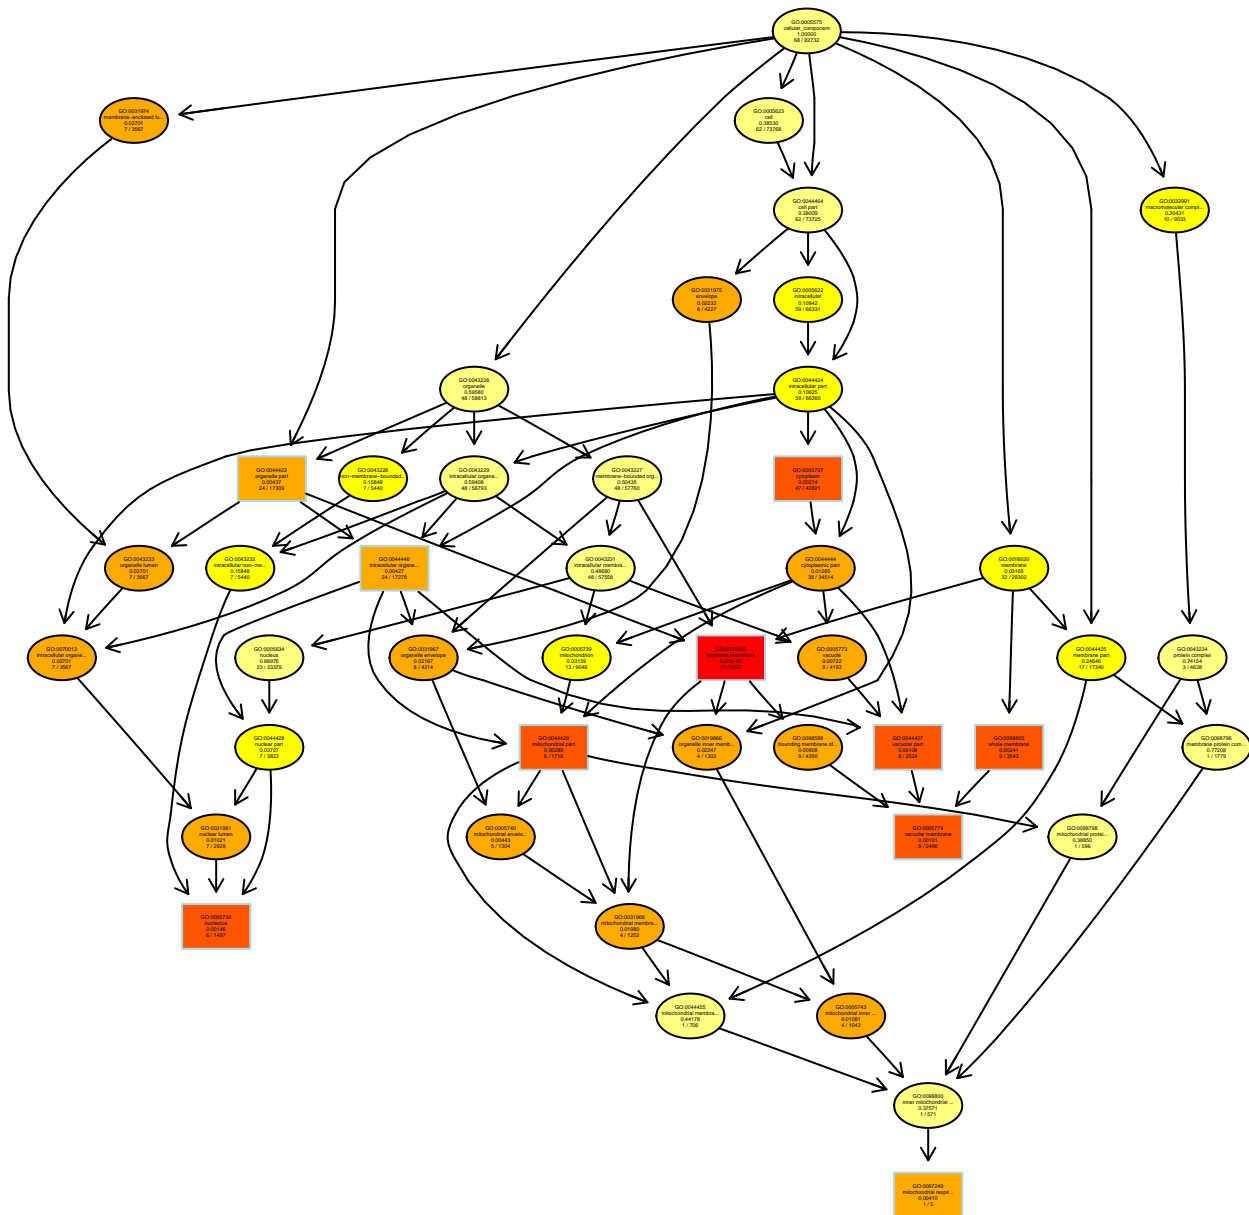

Supplement: s1 [file s1]

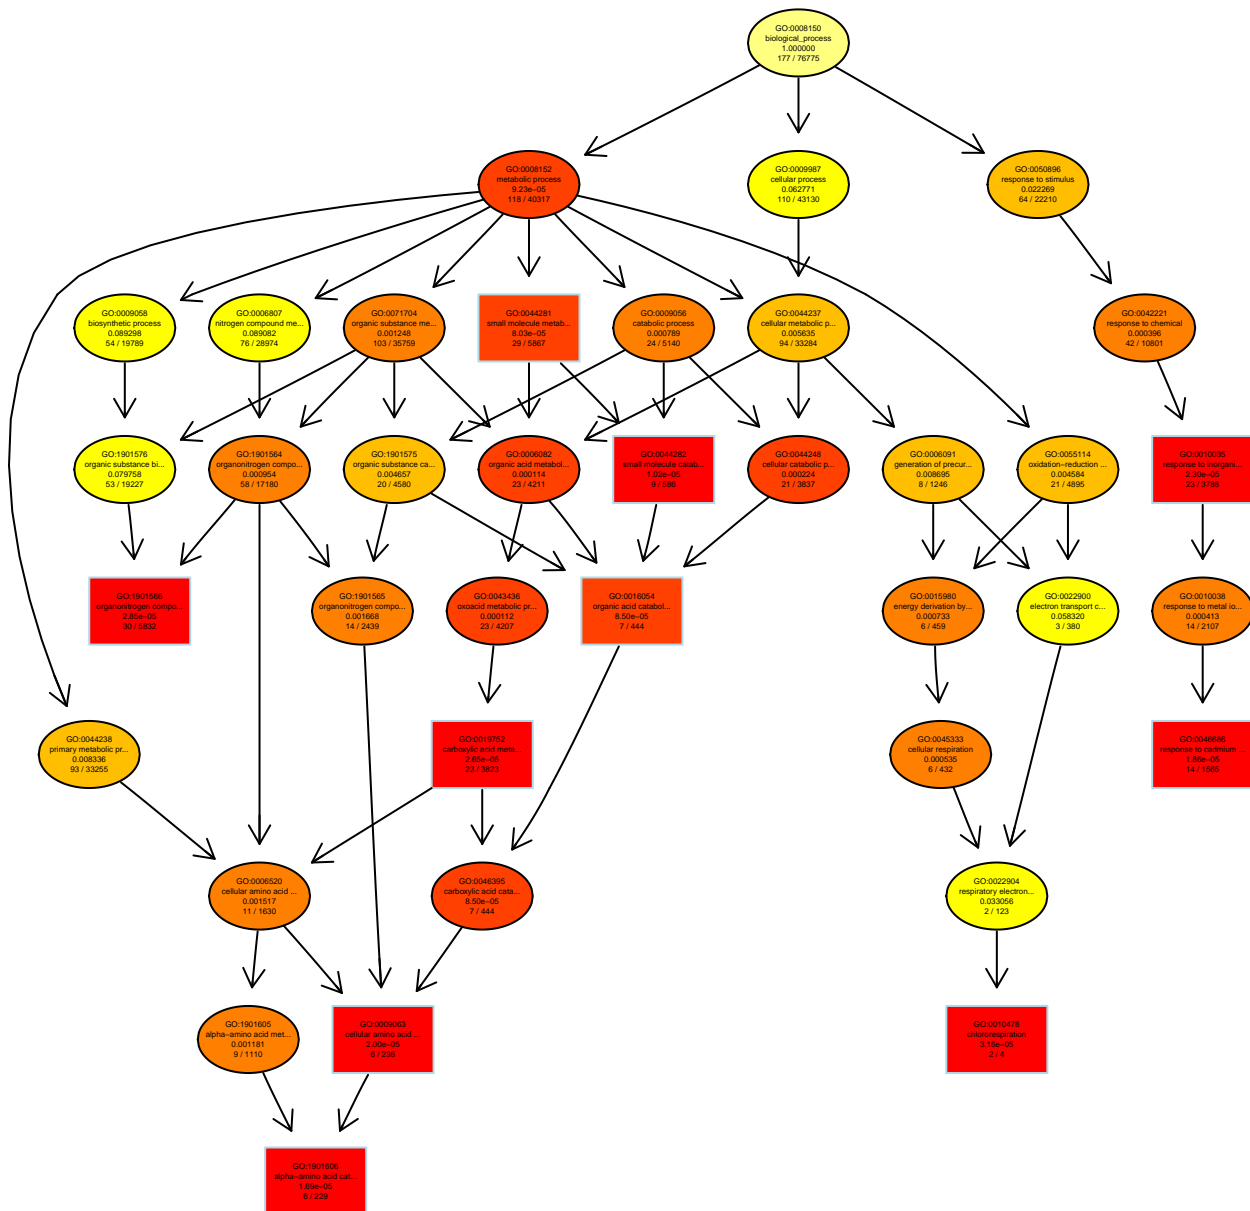

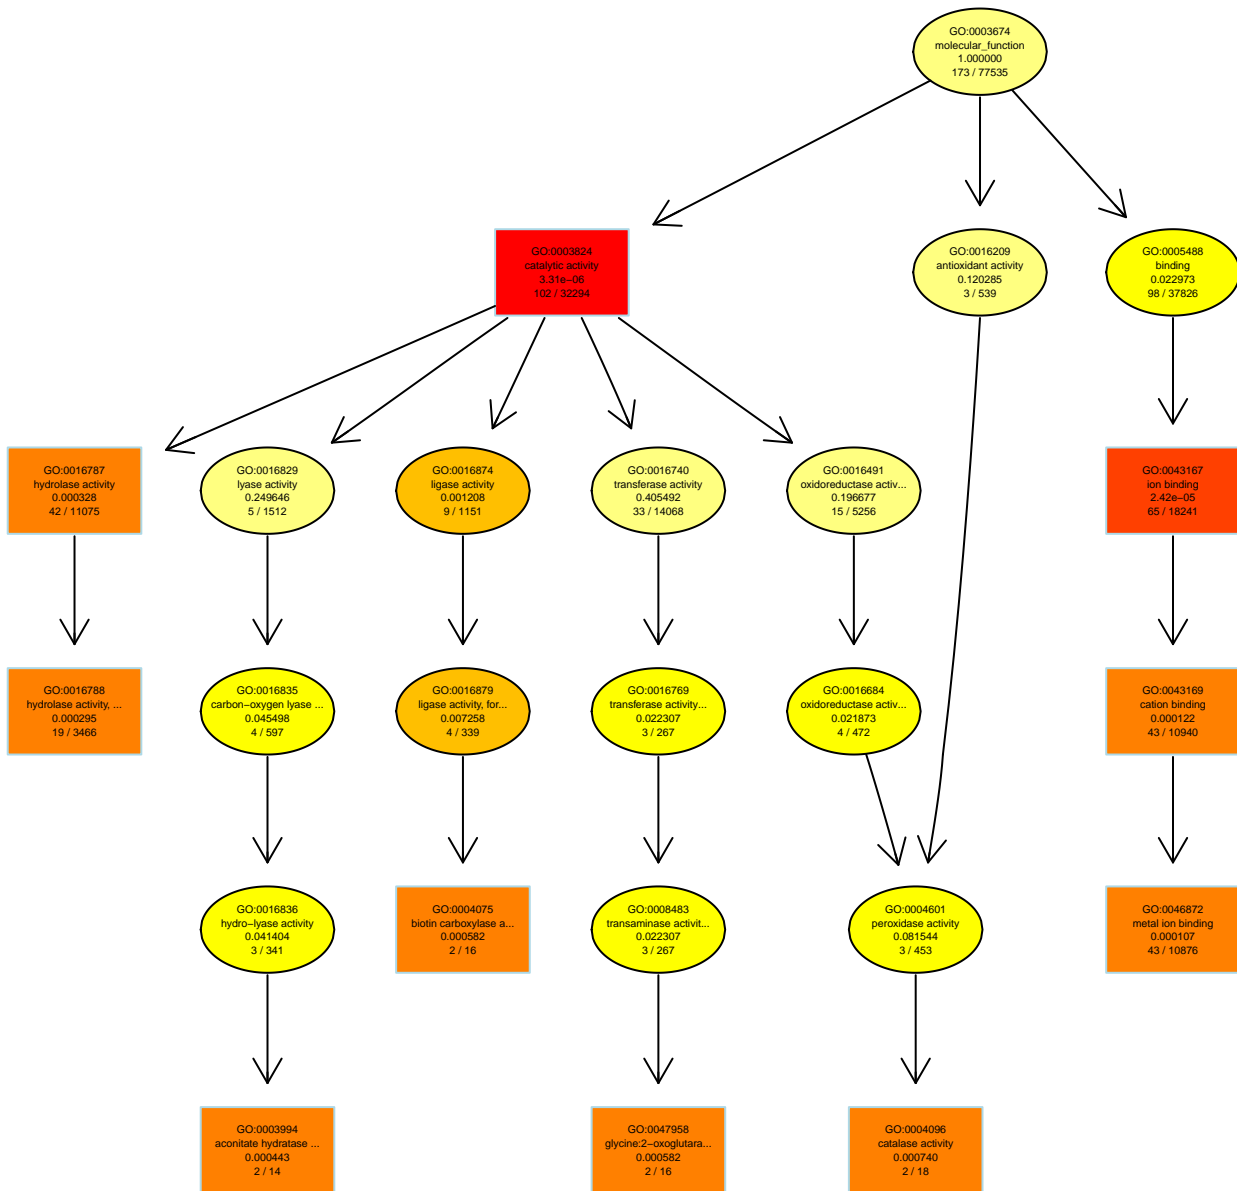

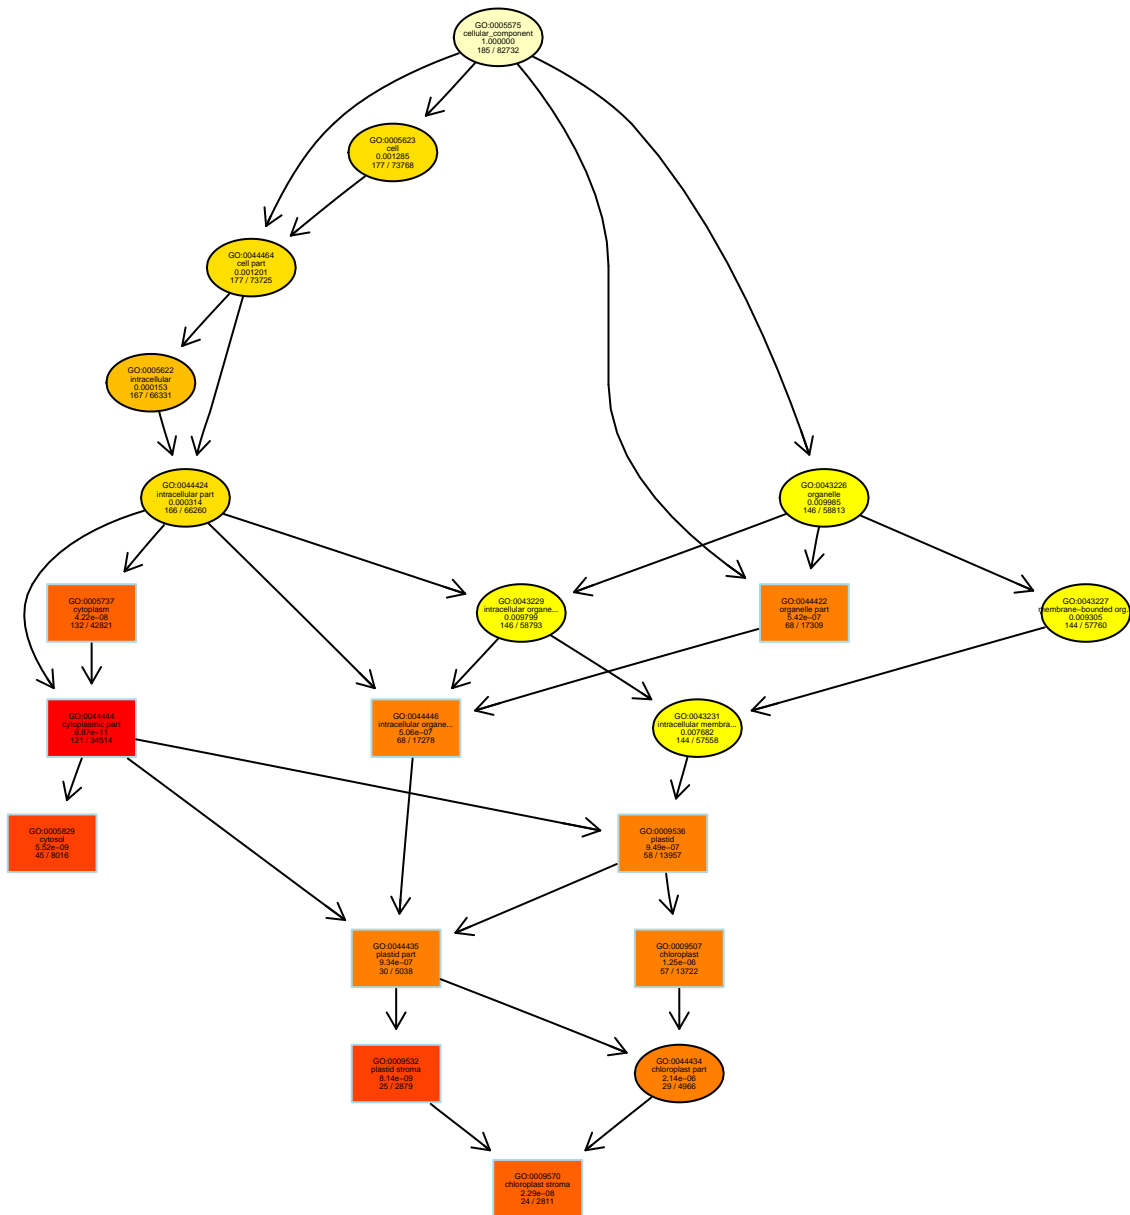

Supplement: s1 [file s1]

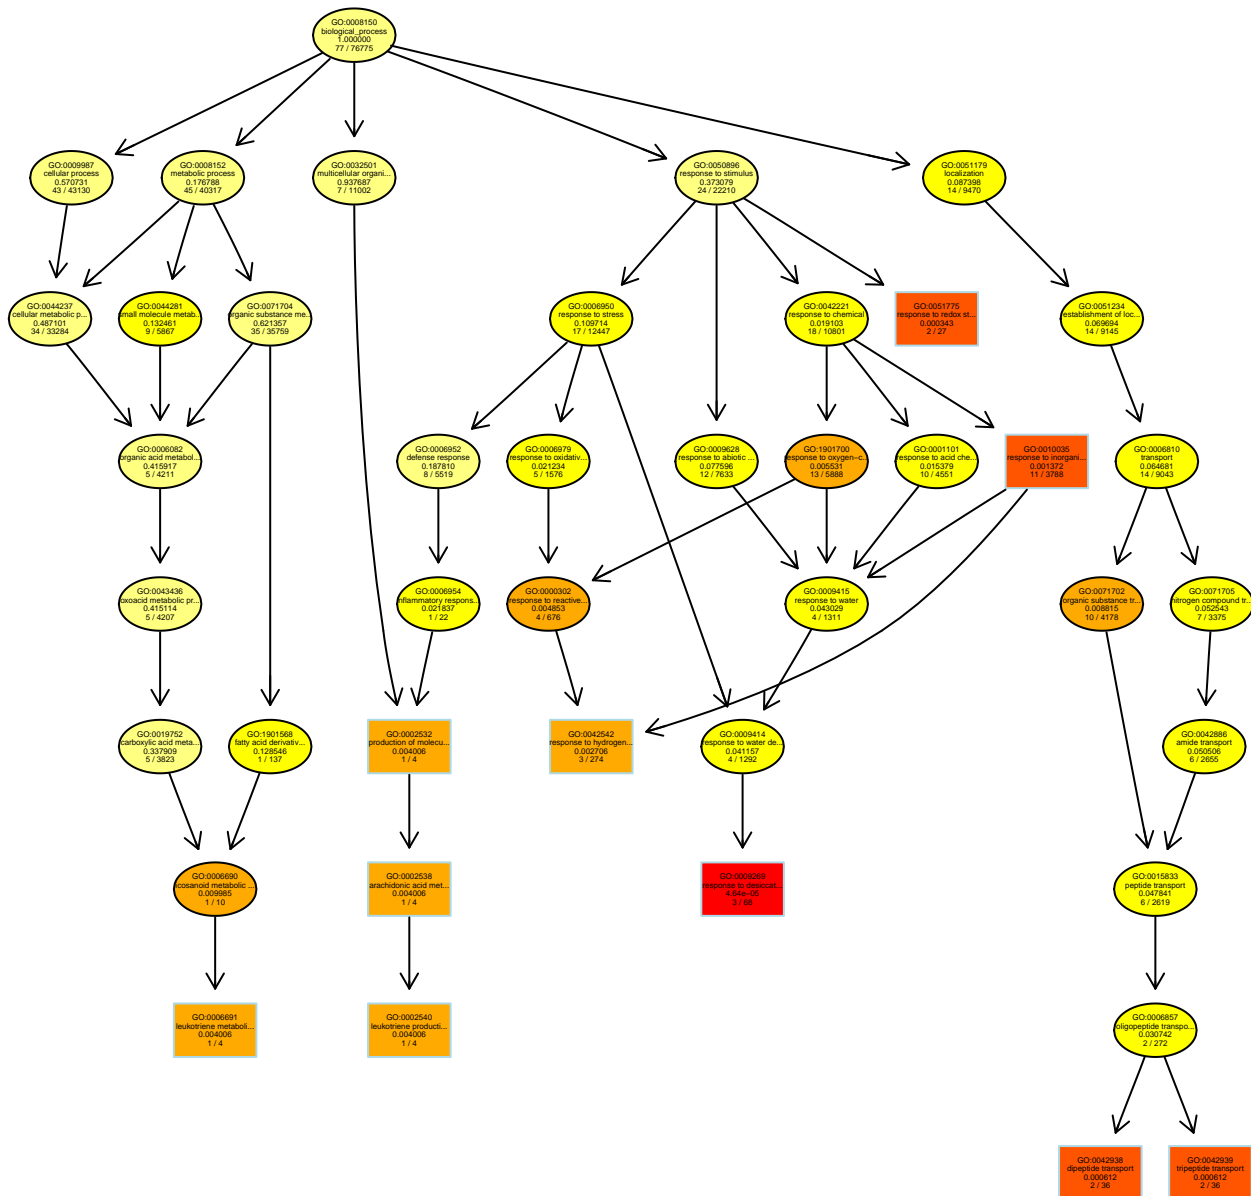

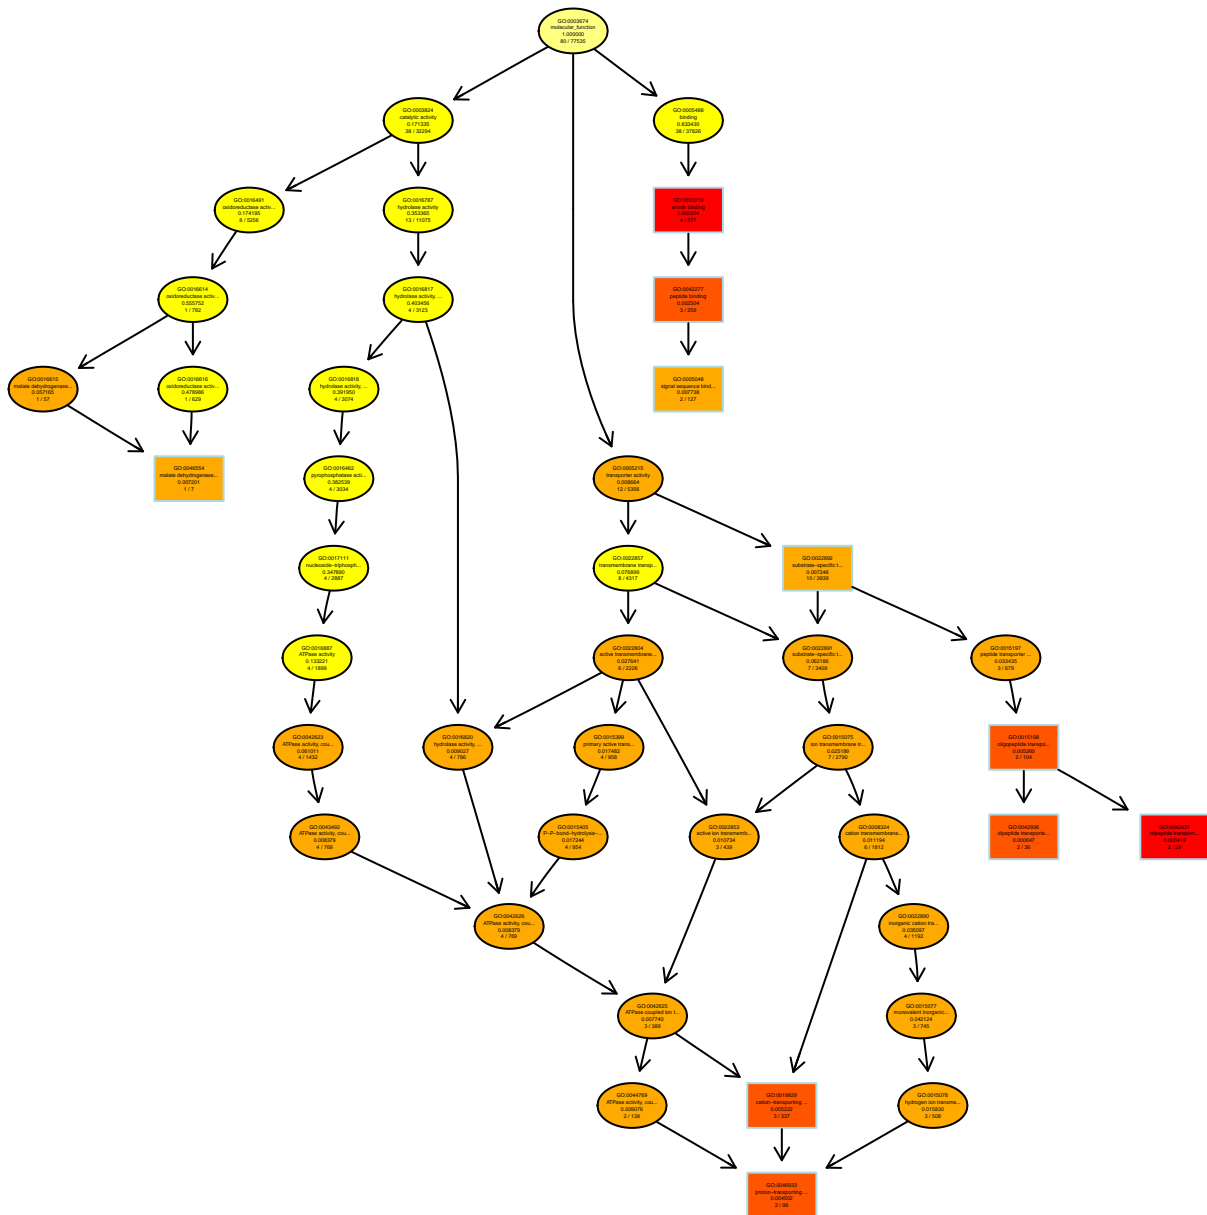

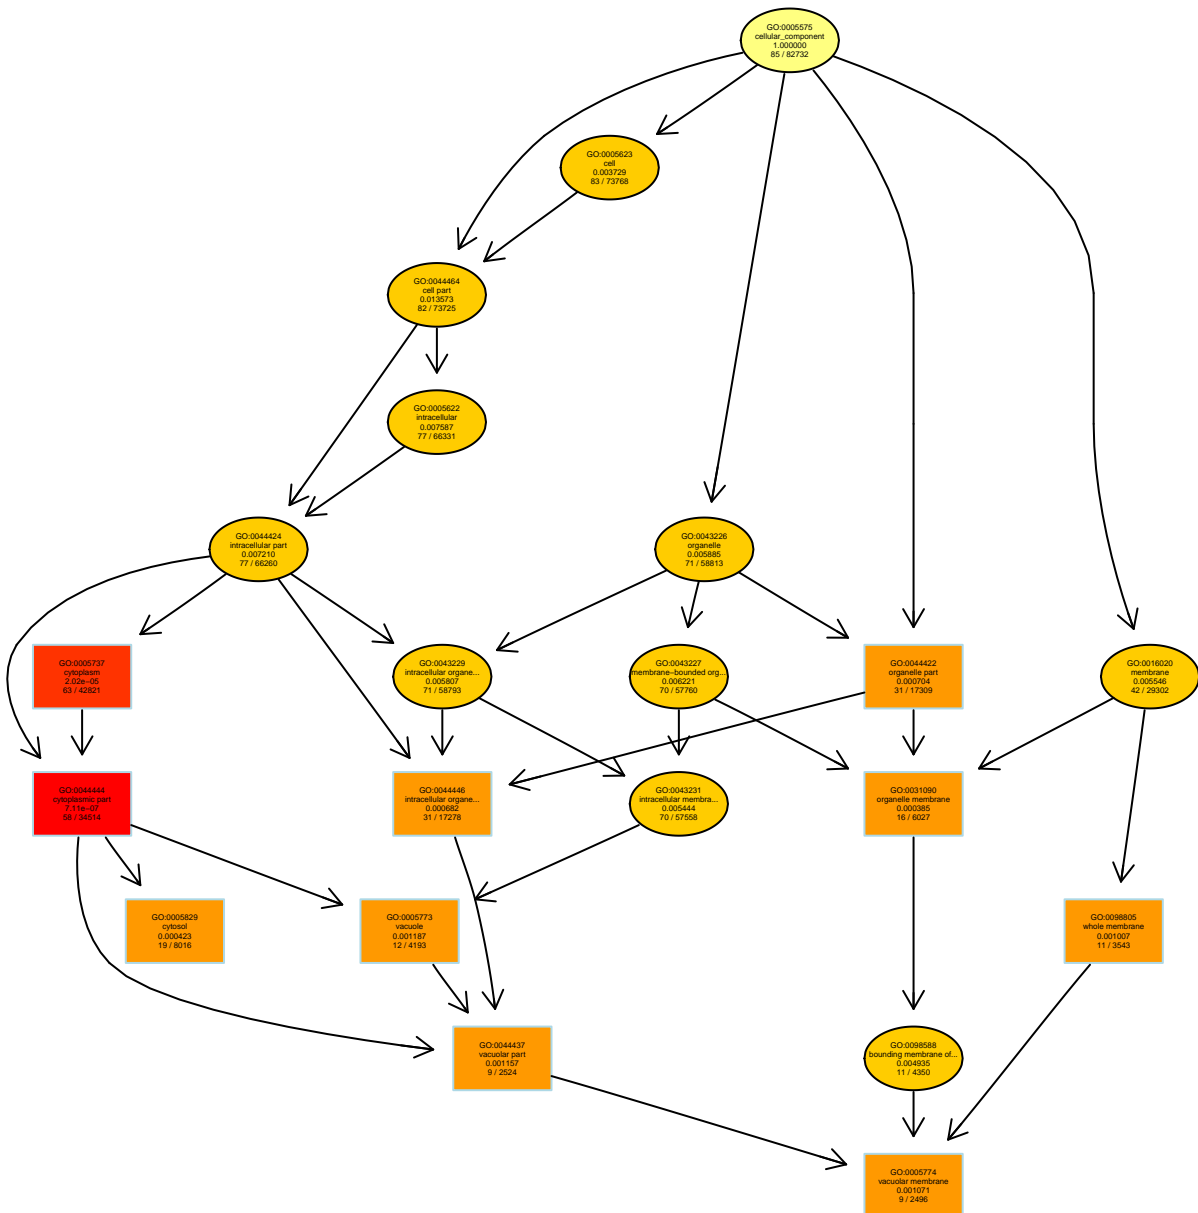

Supplement: s1 [file s1]

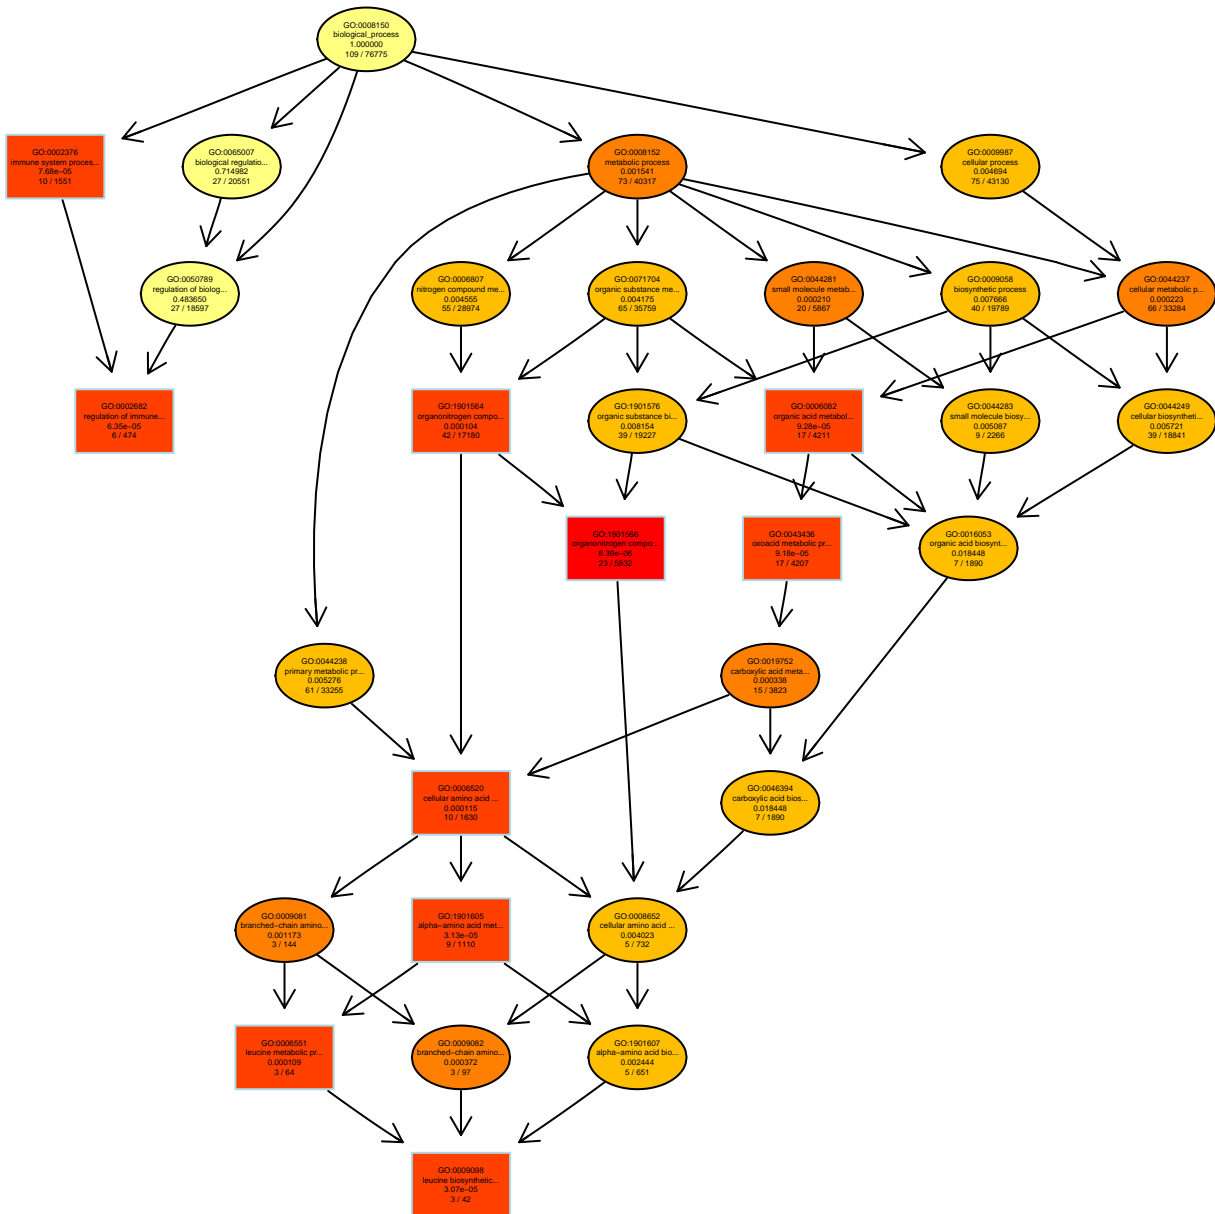

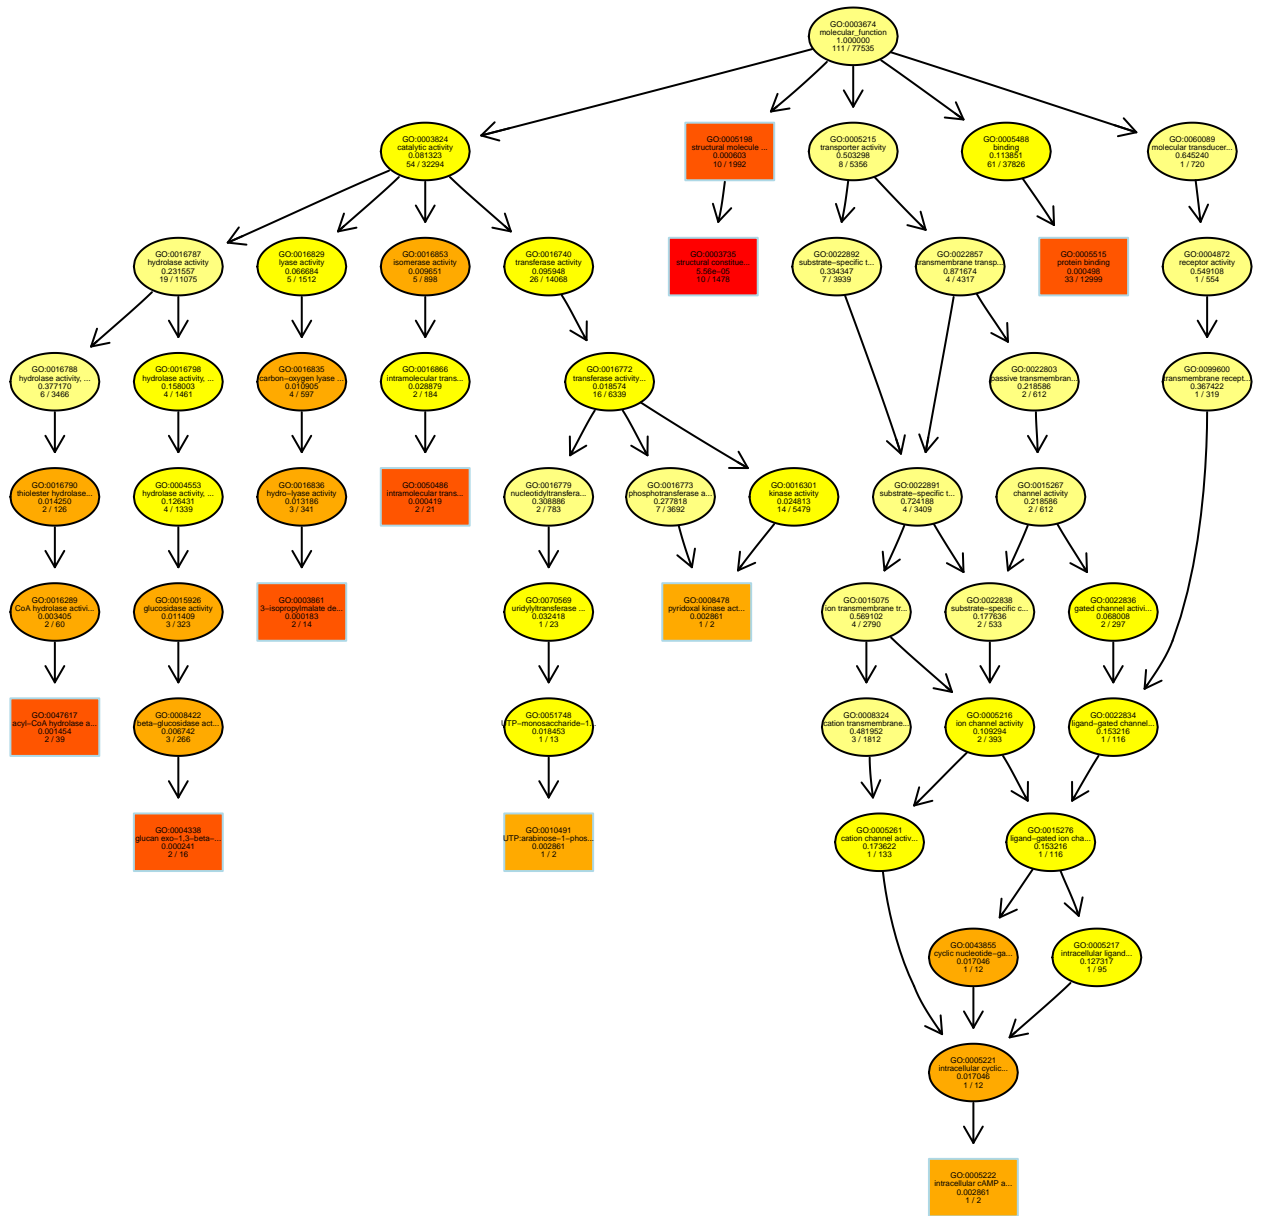

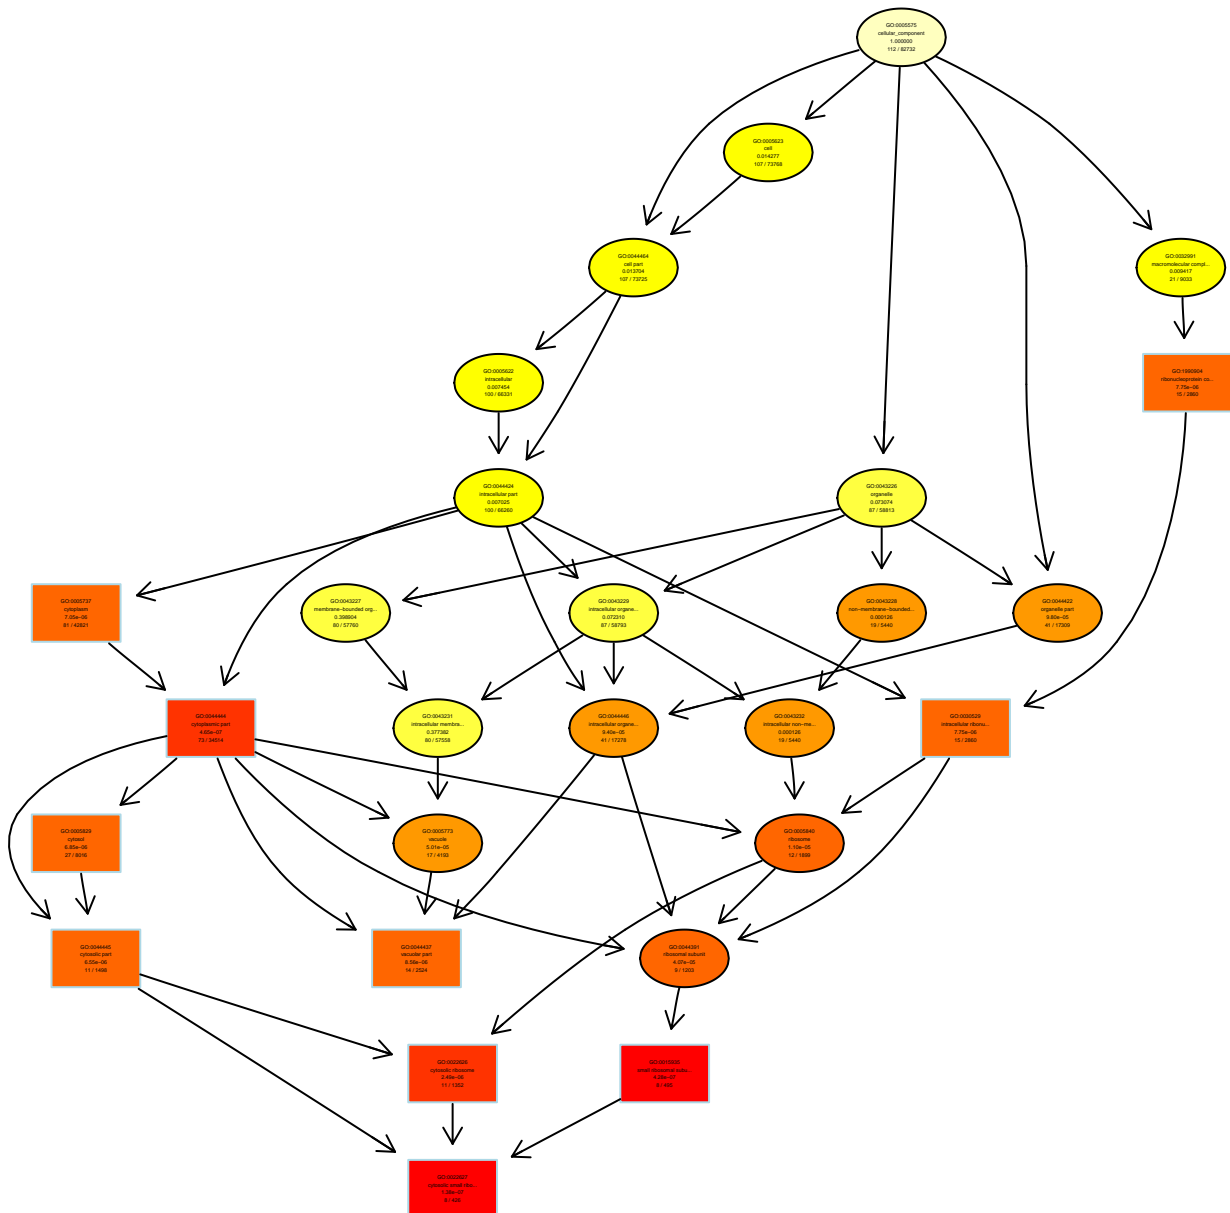

Supplement: s1 [file s1]



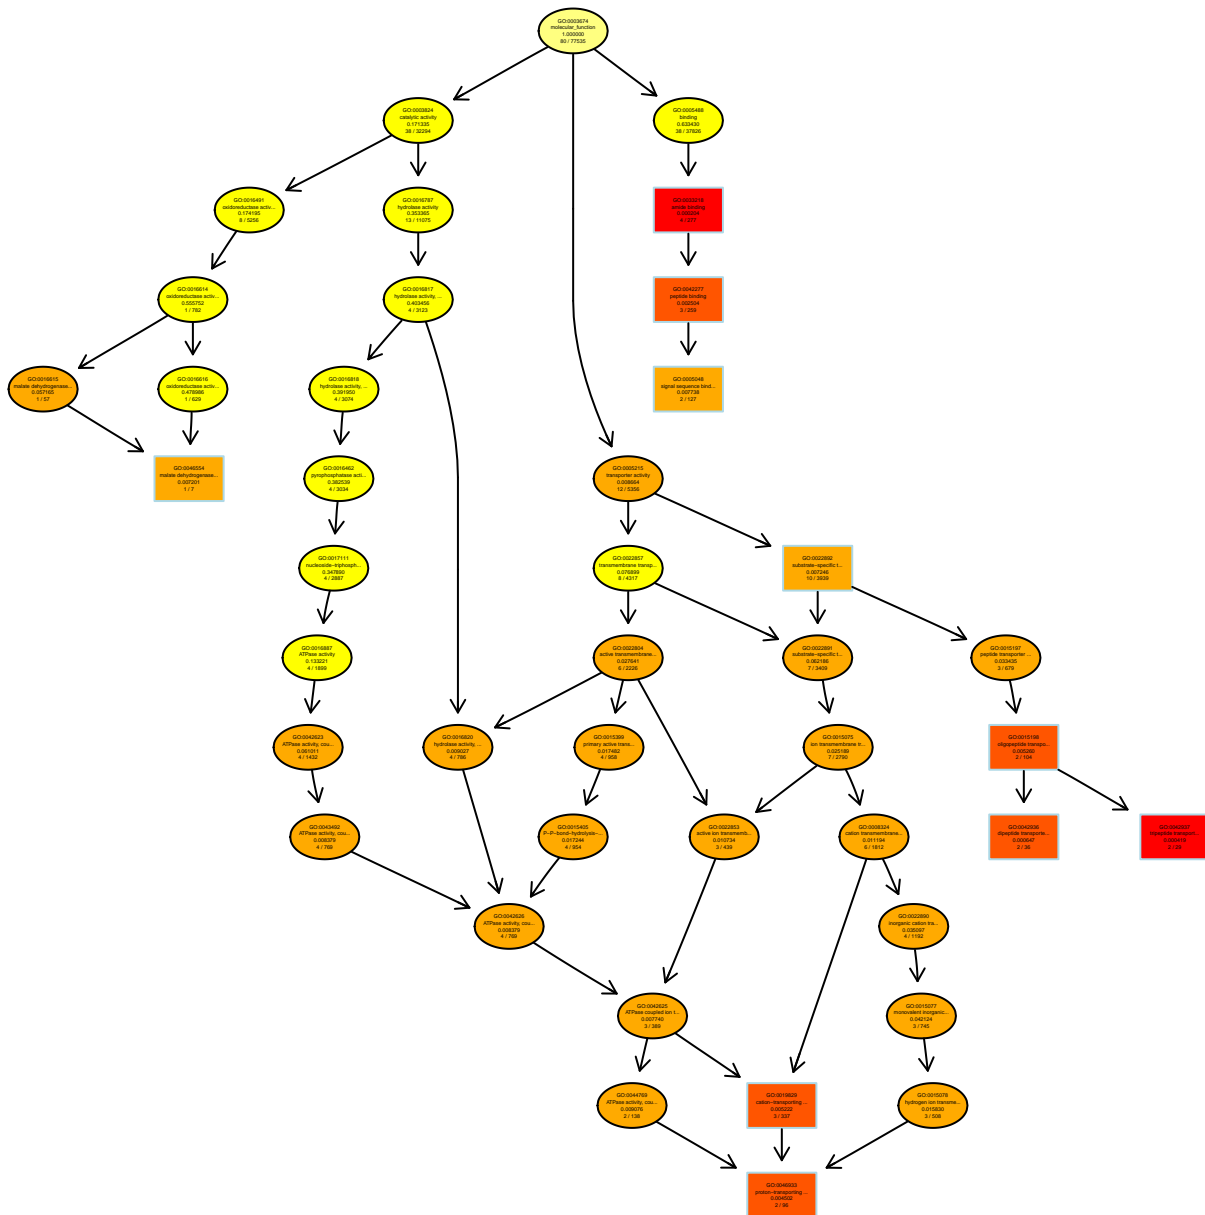



Supplement: s1 [file s1]

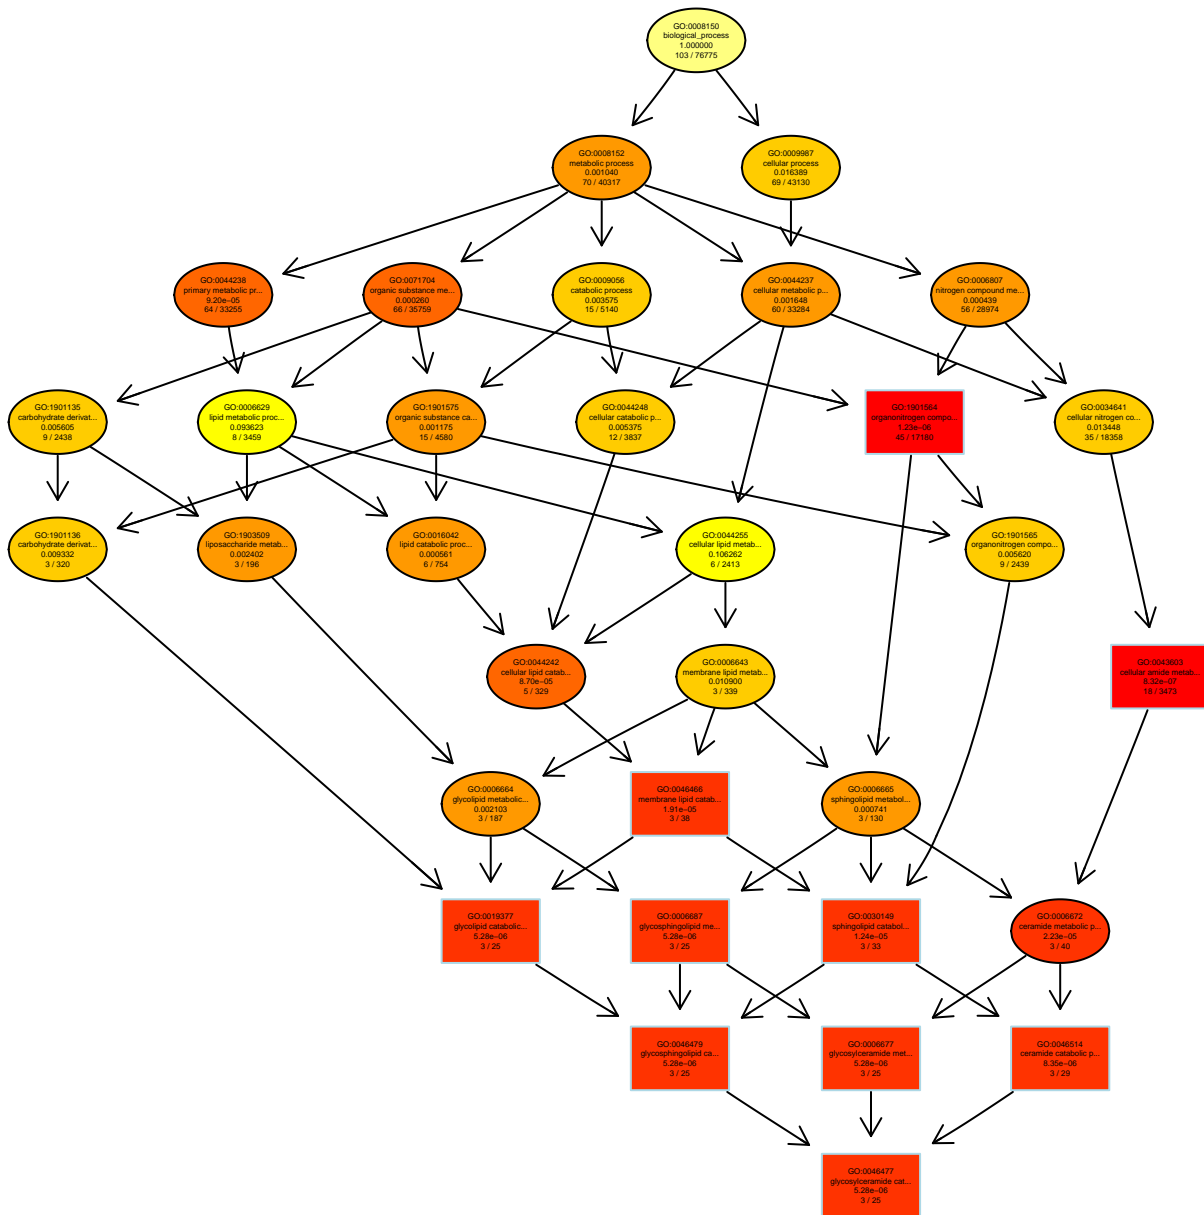

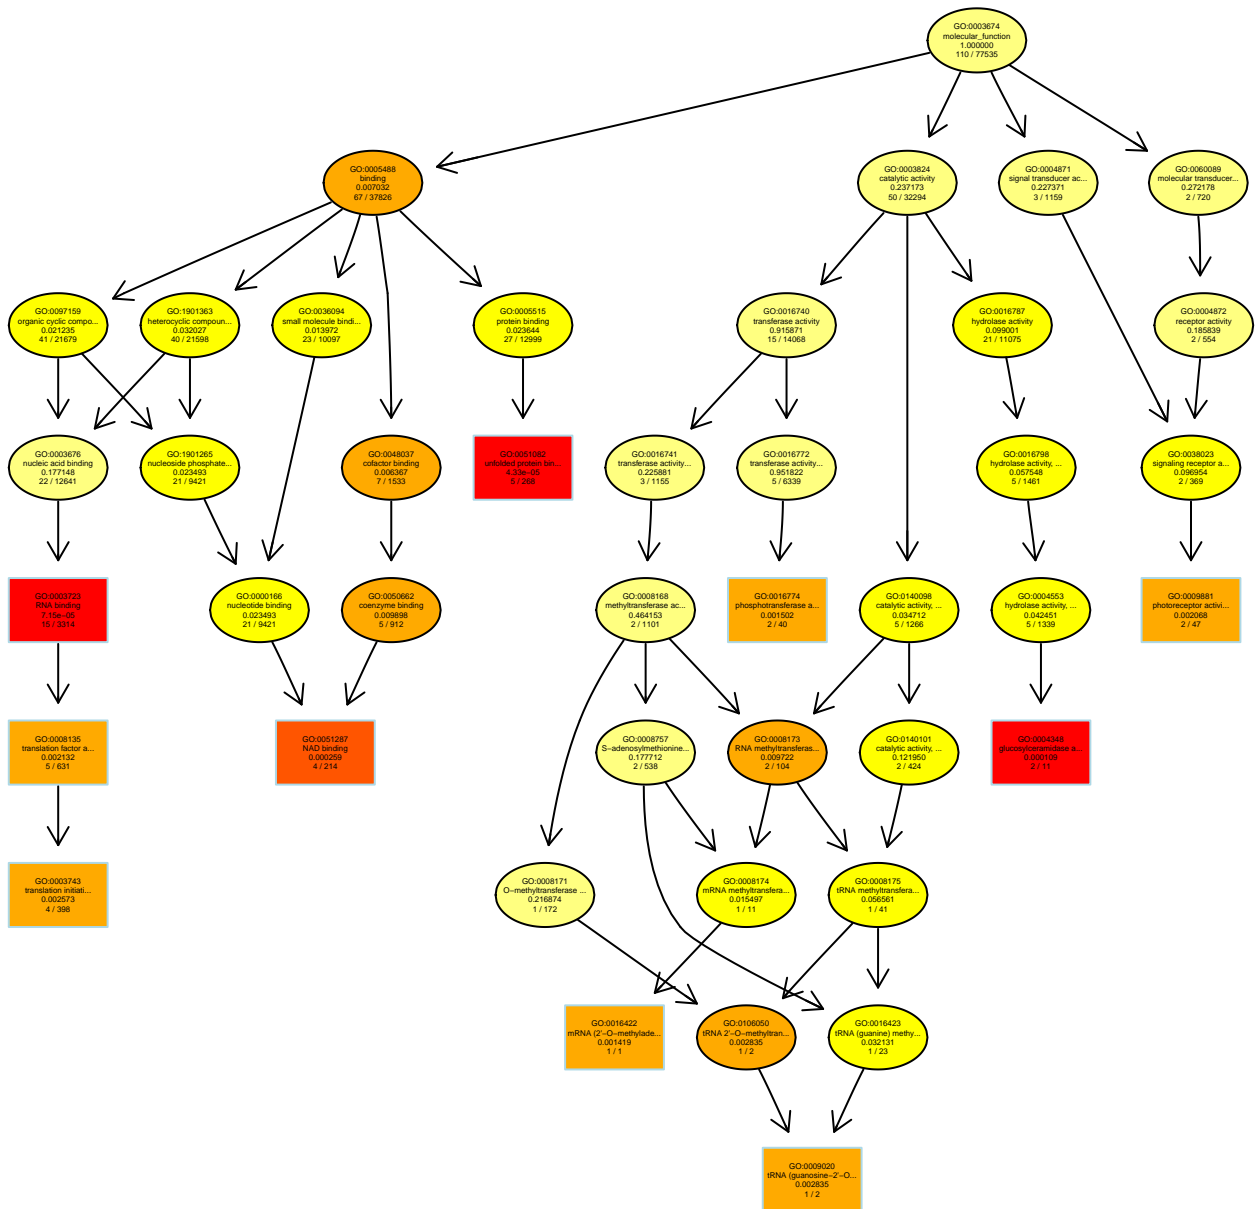

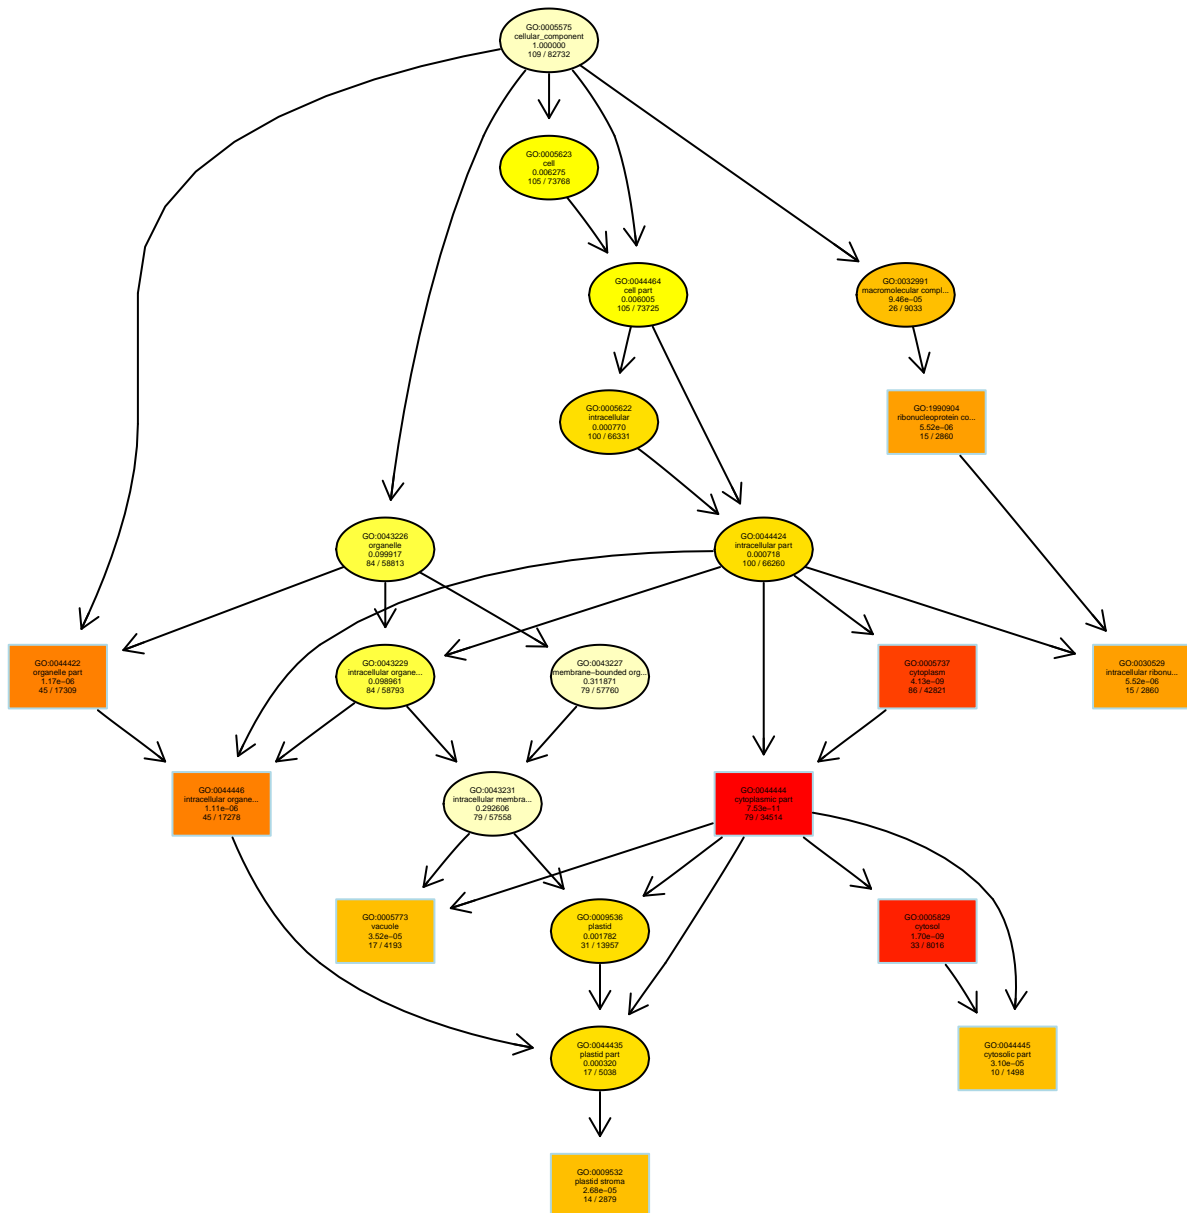

Supplement: s1 [file s1]

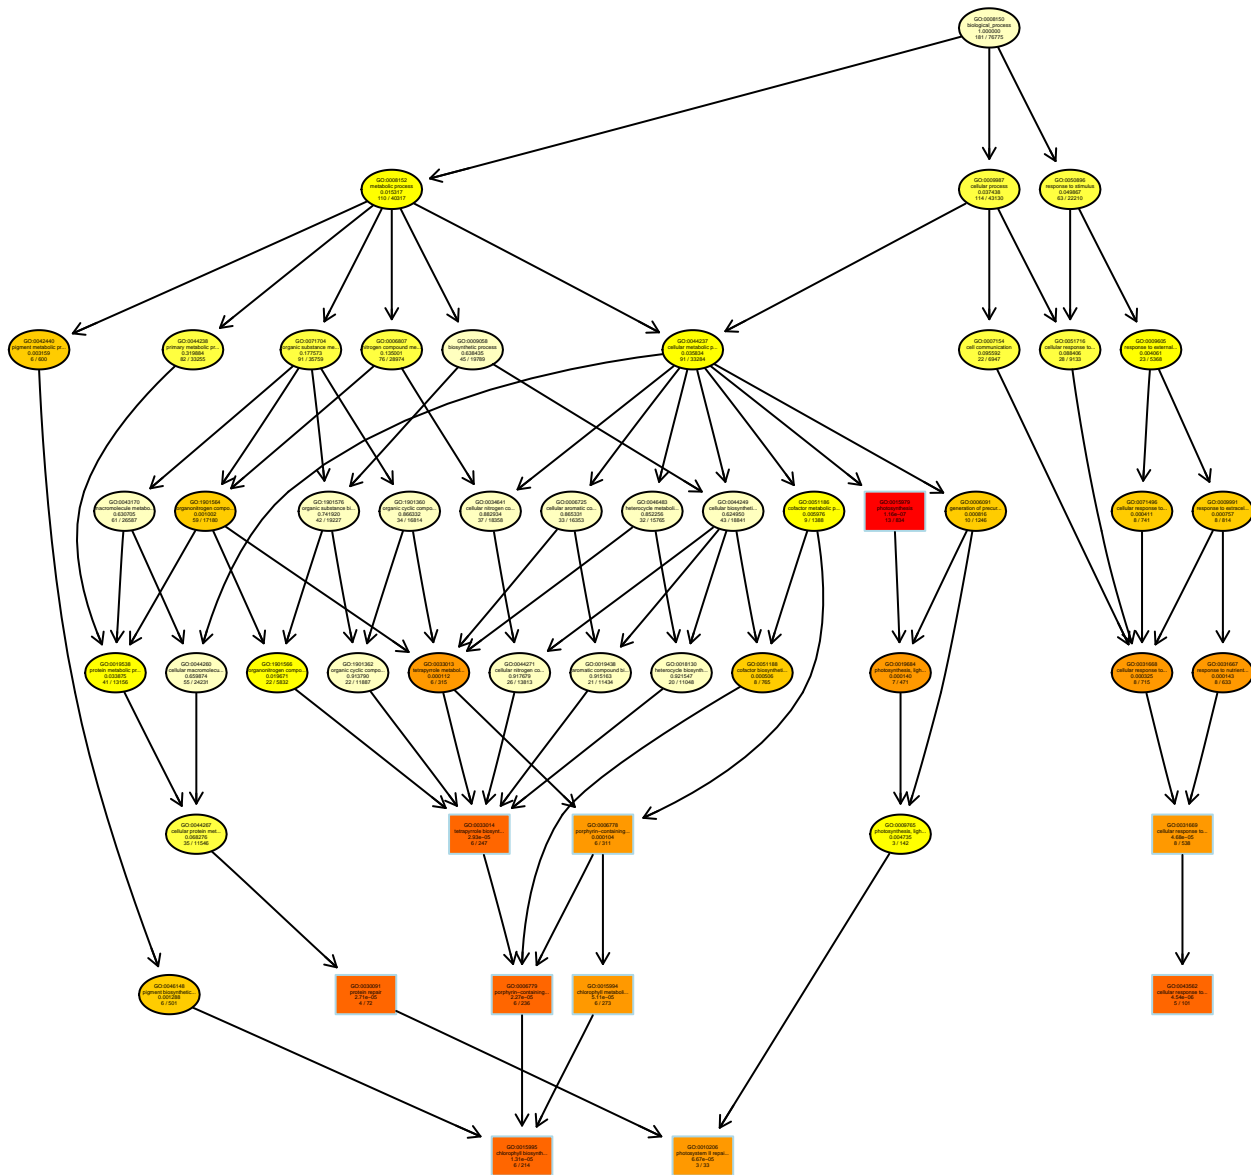

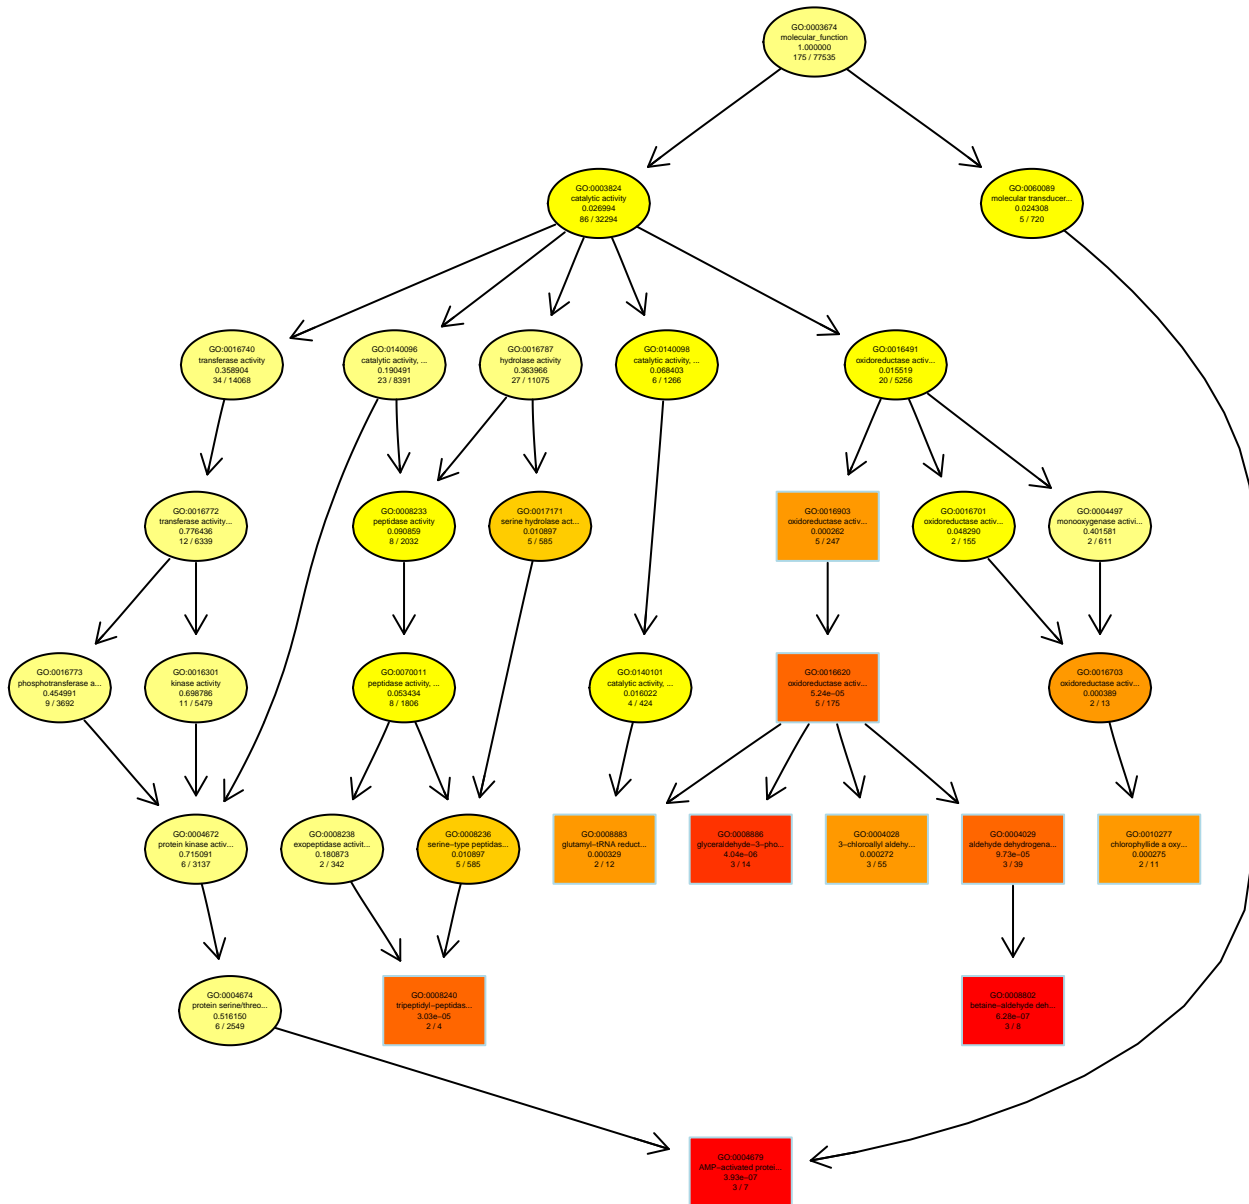

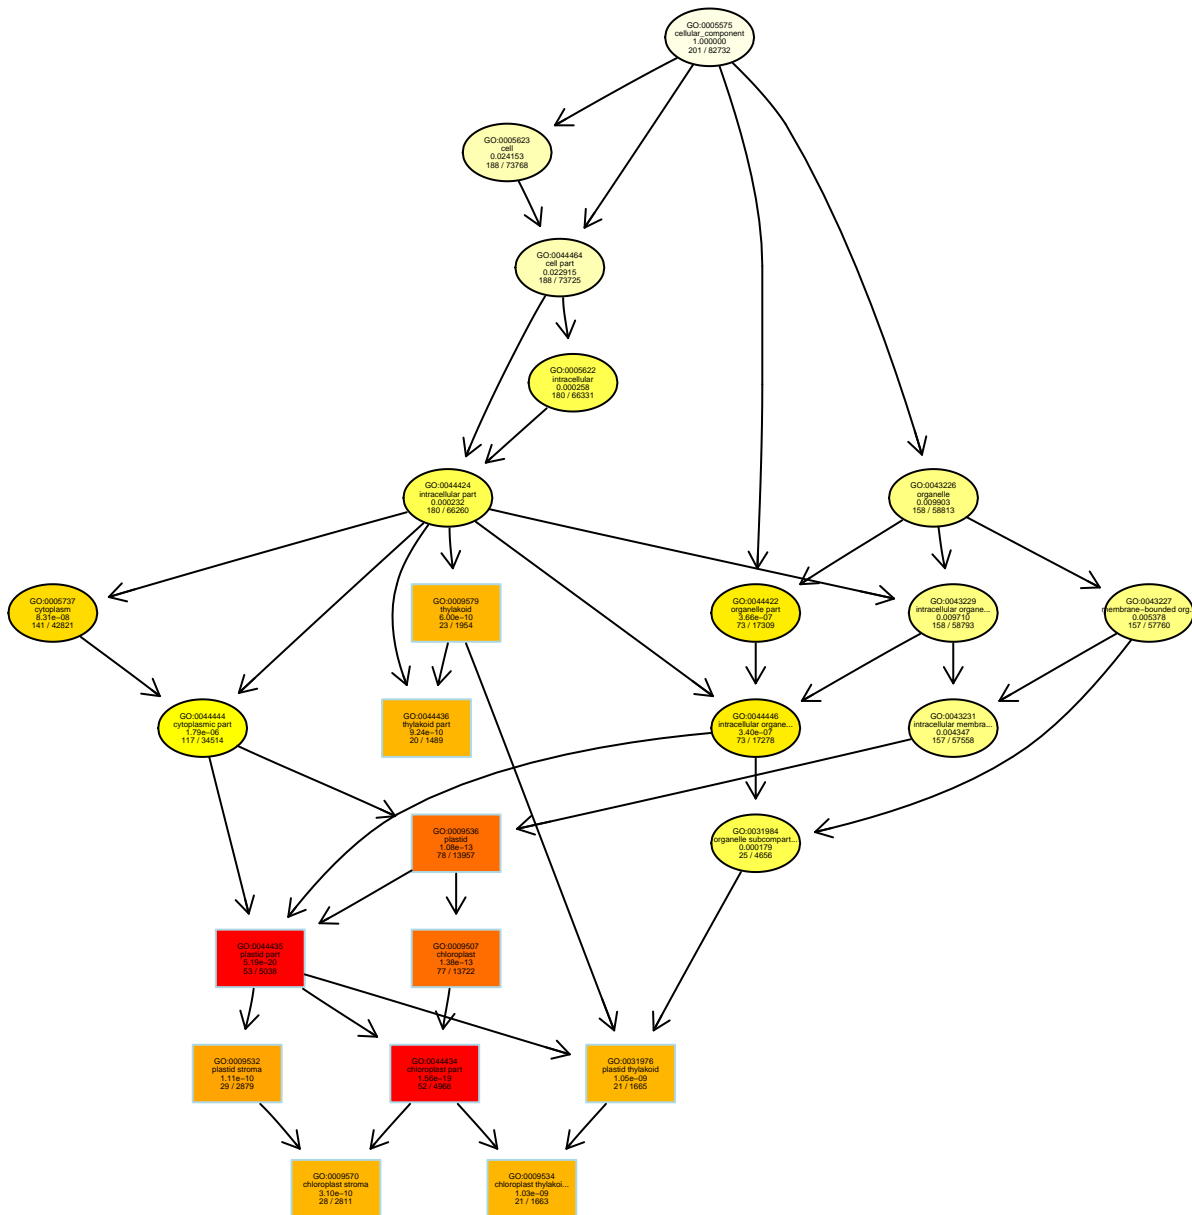

Supplement: s1 [file s1]

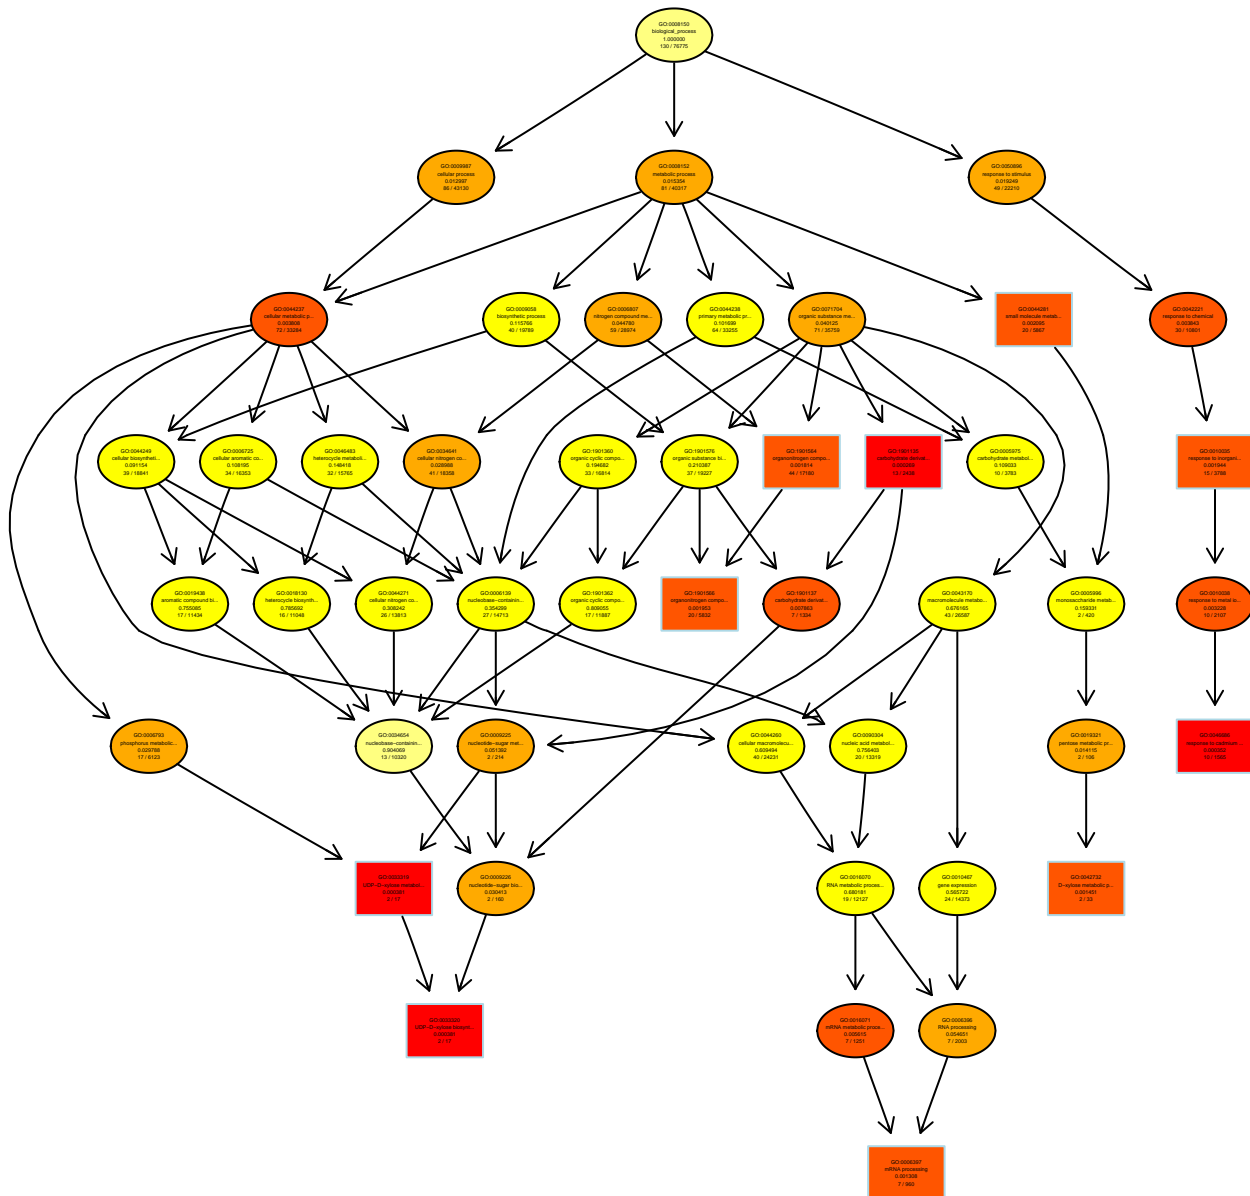





Supplement: s1 [file s1]

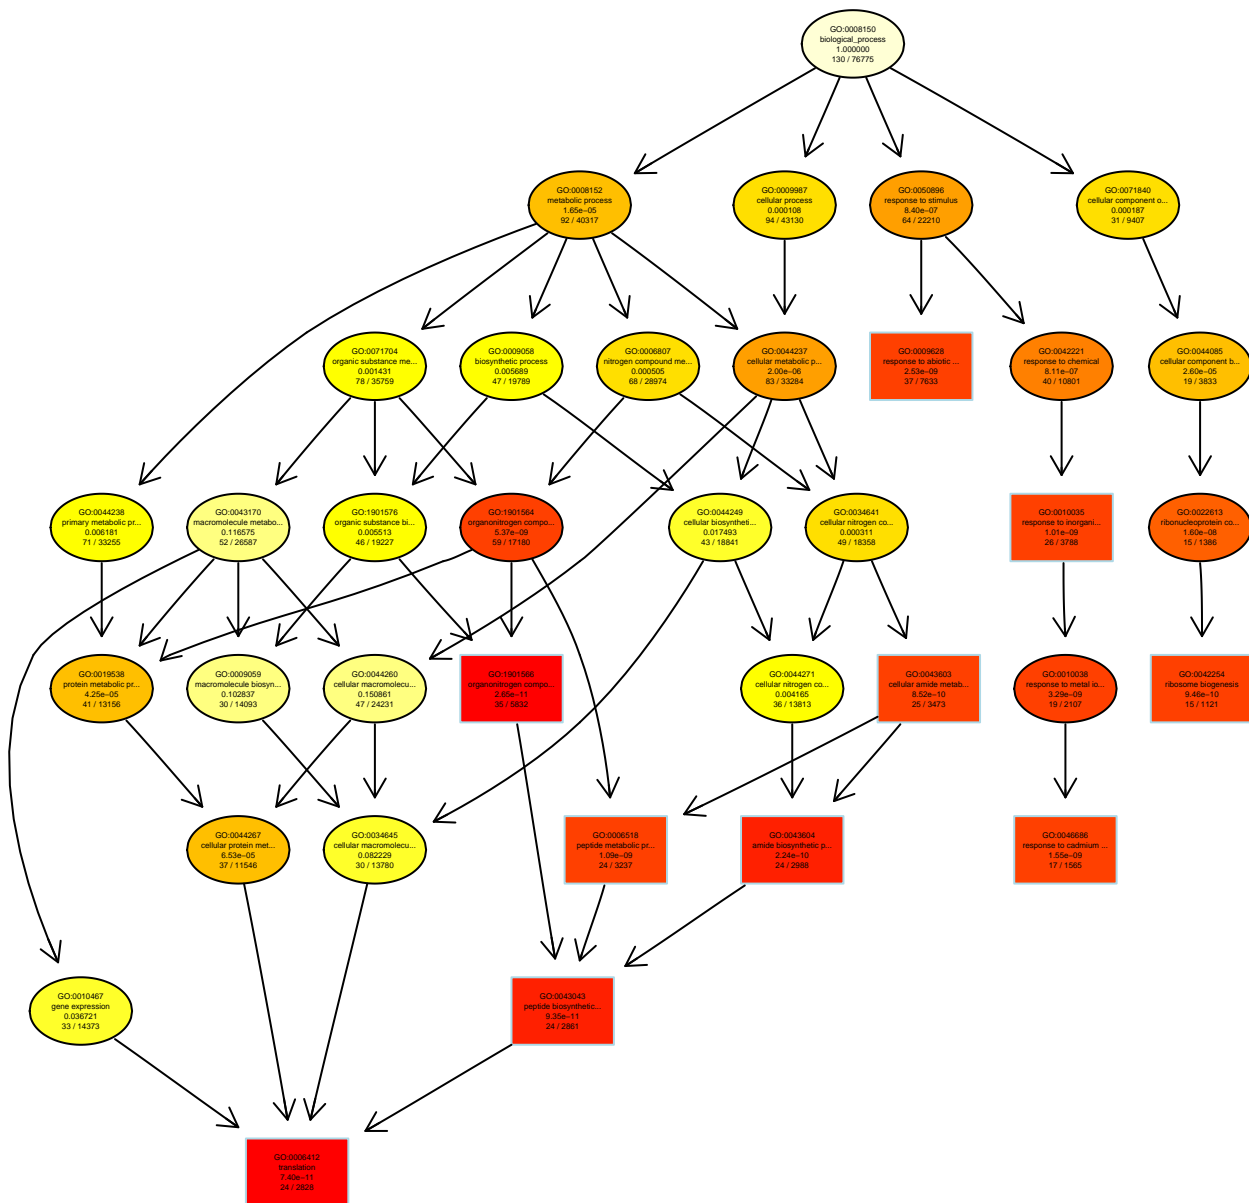

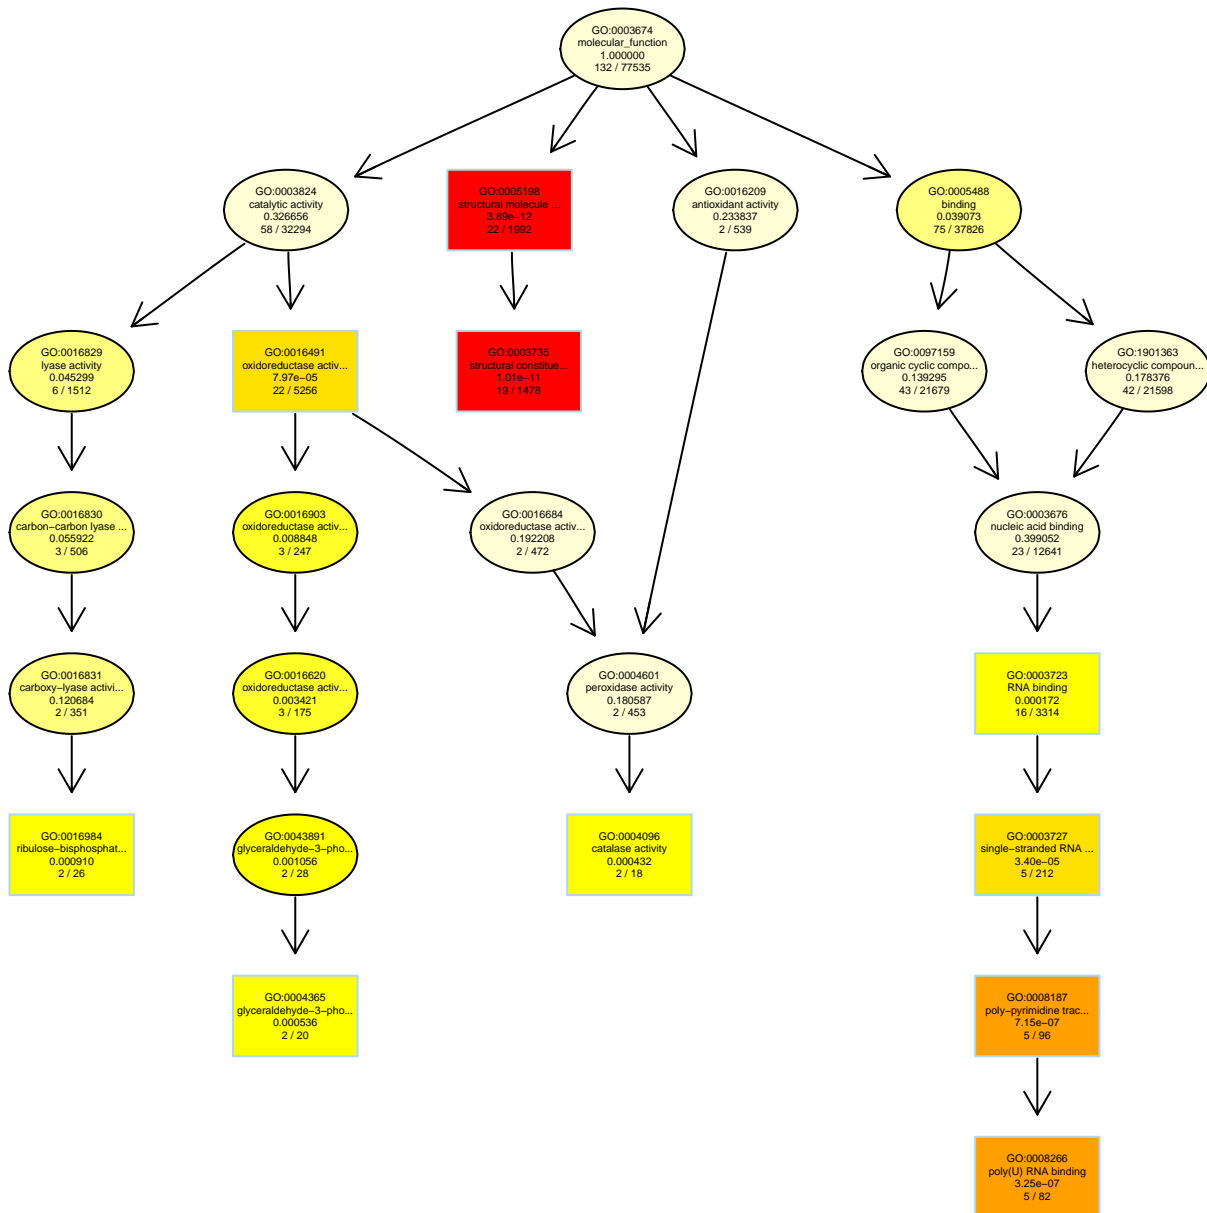

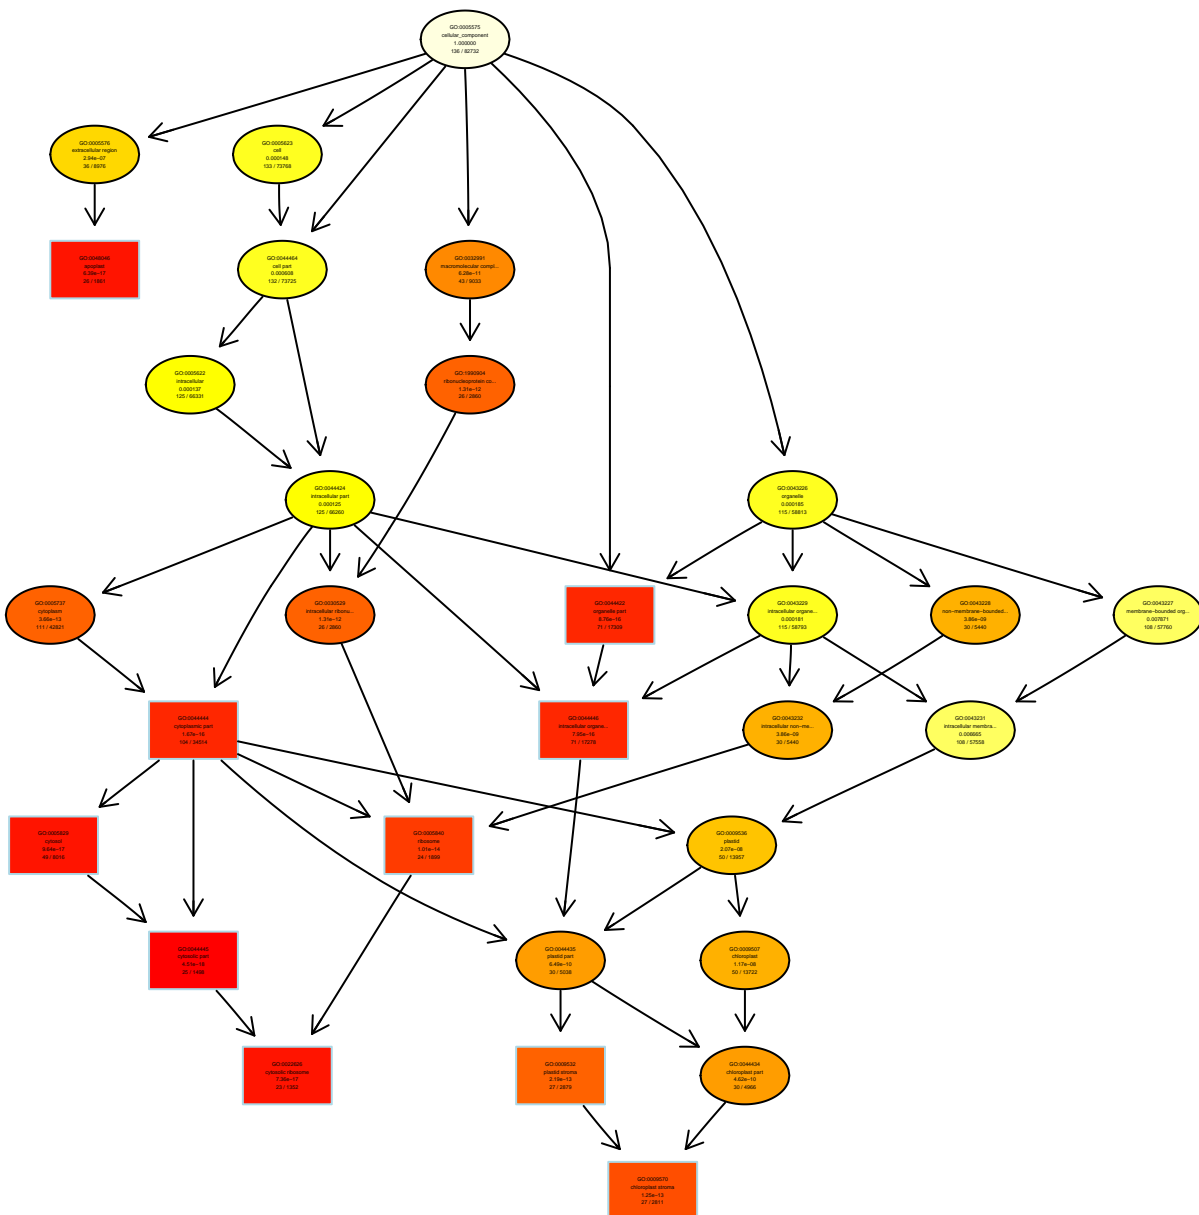

Supplement: s1 [file s1]

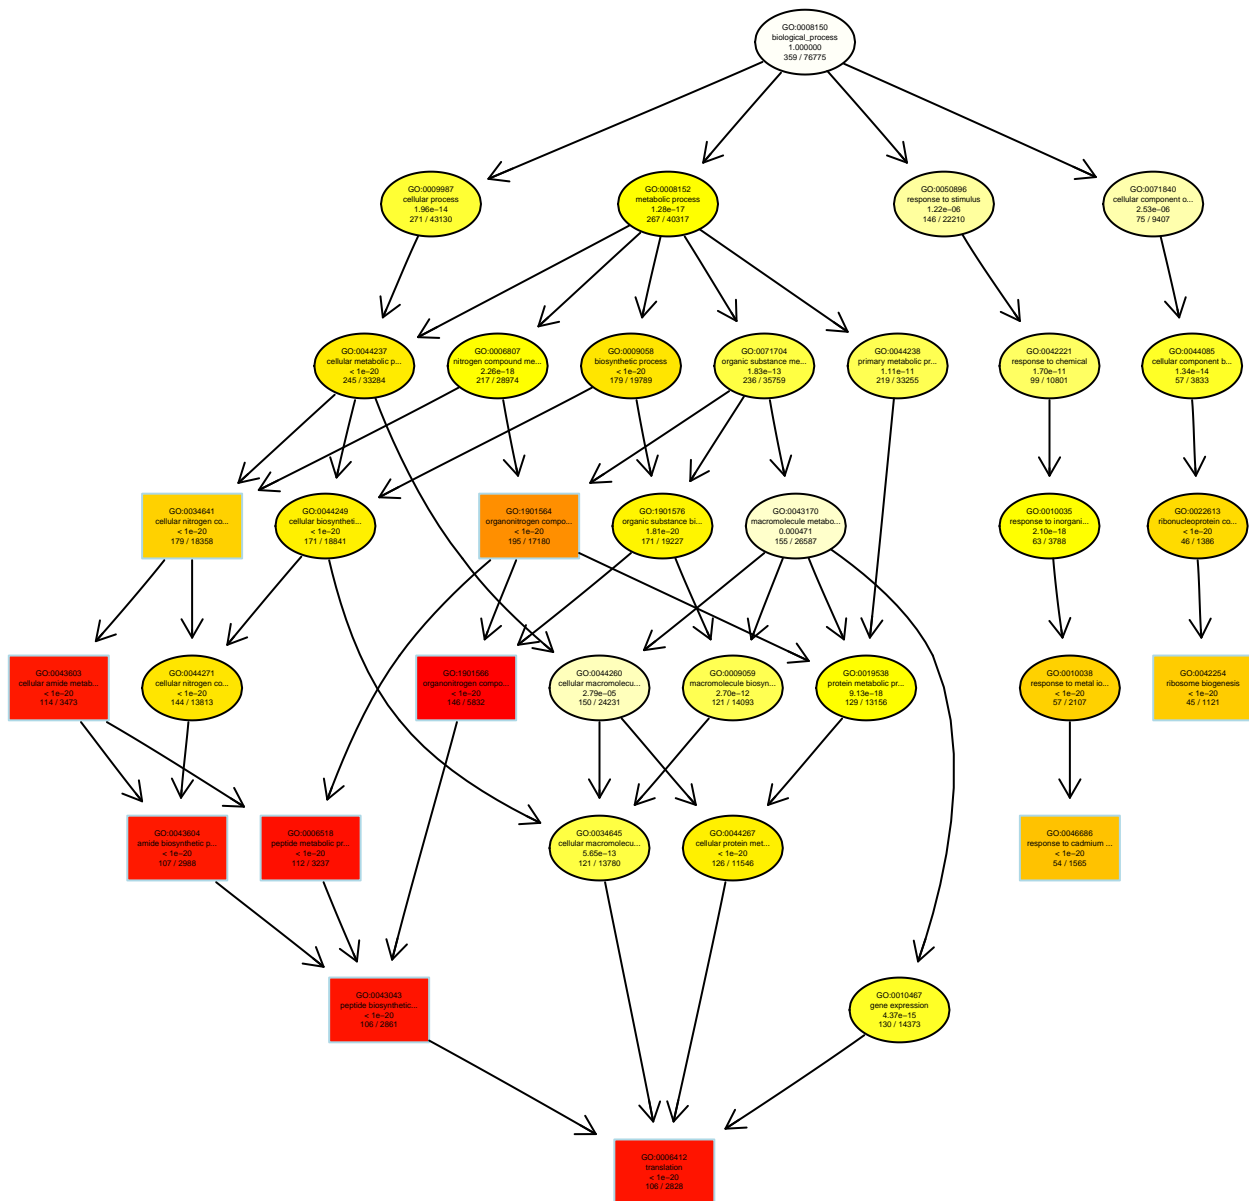

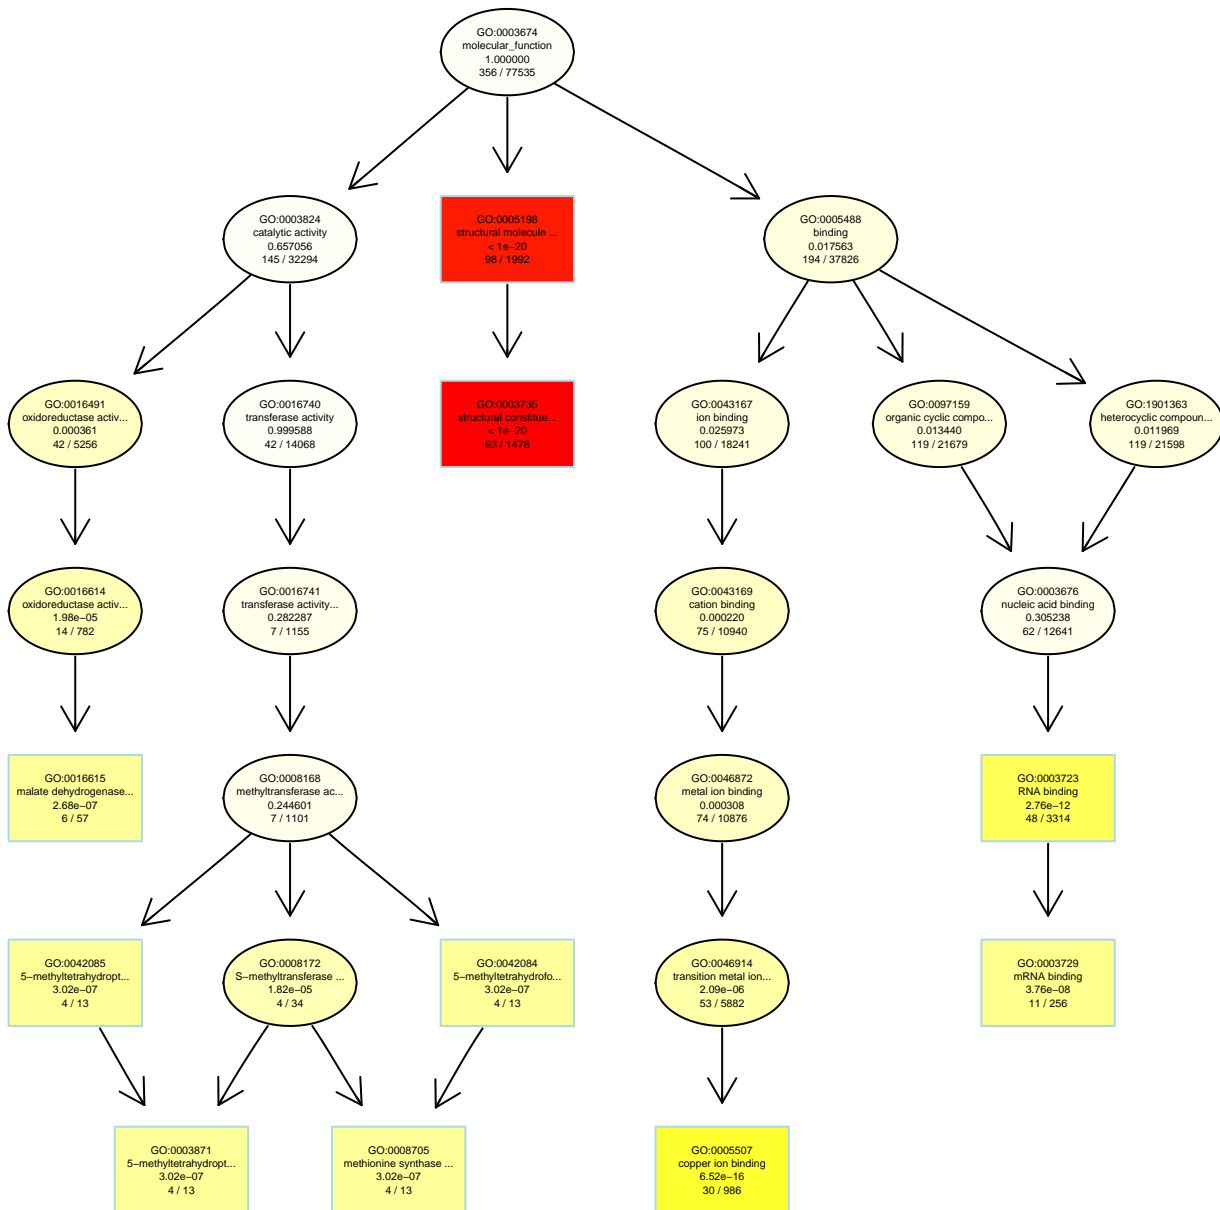

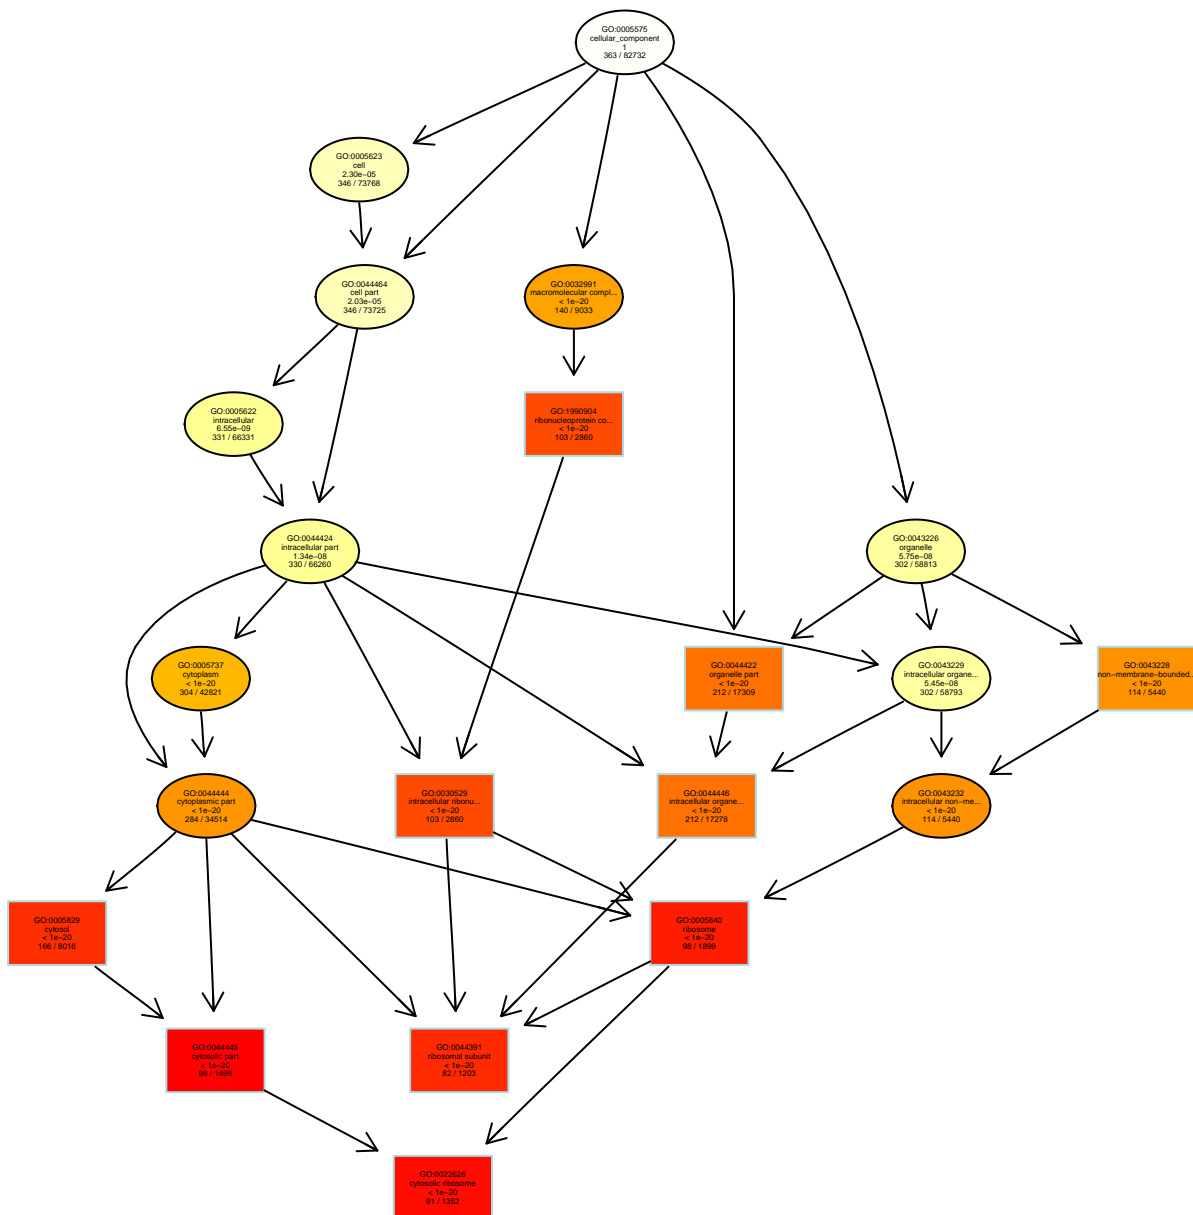

Supplement: s1 [file s1]

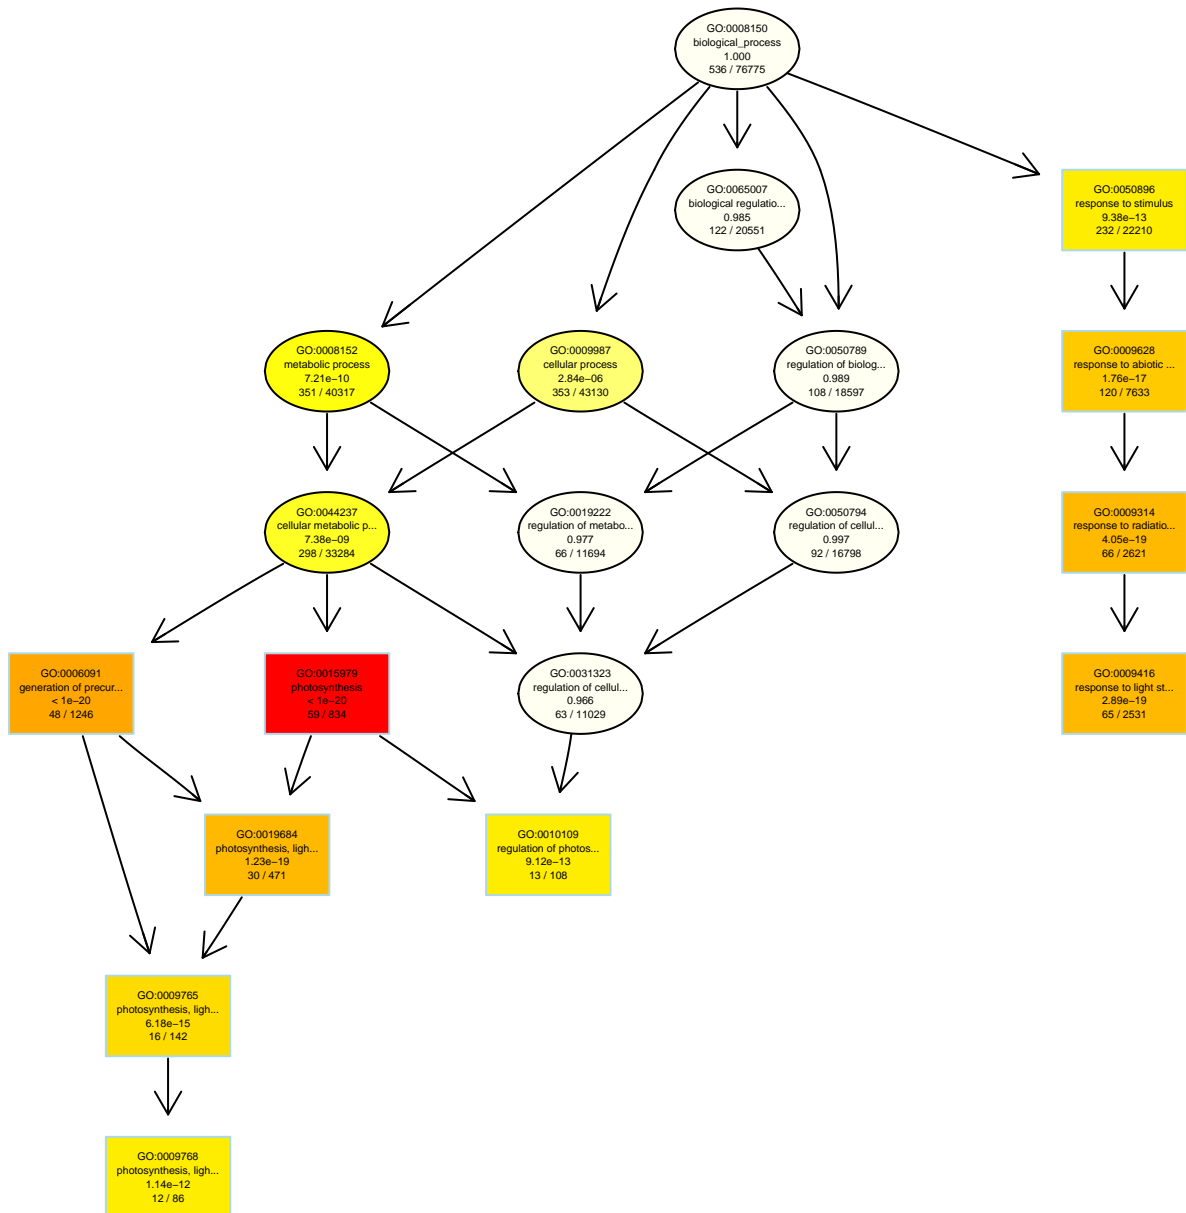

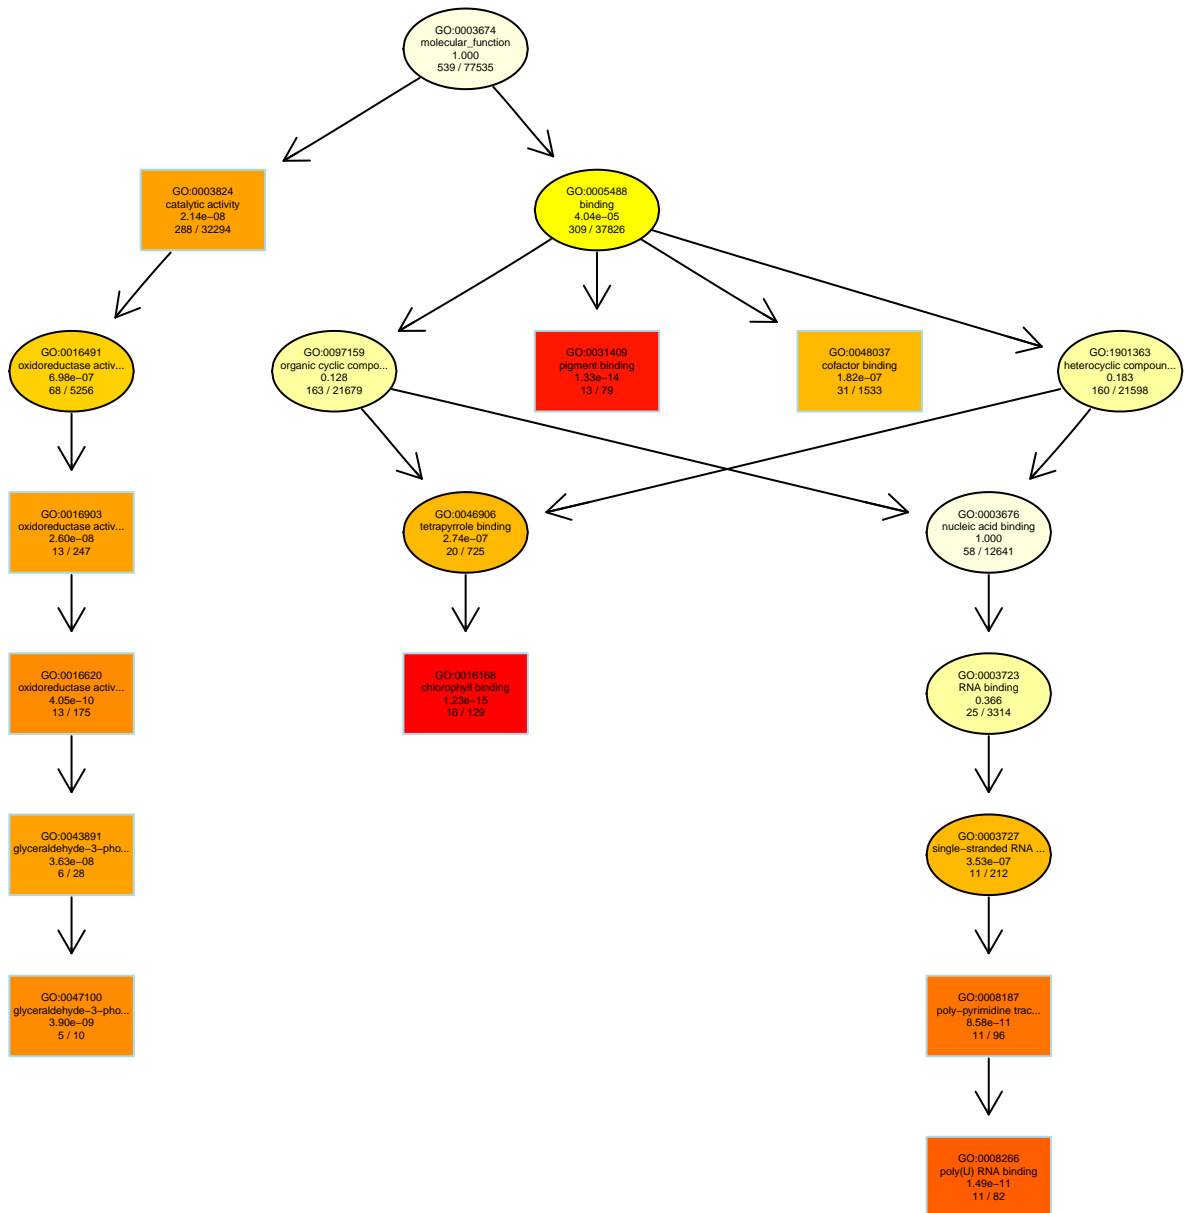

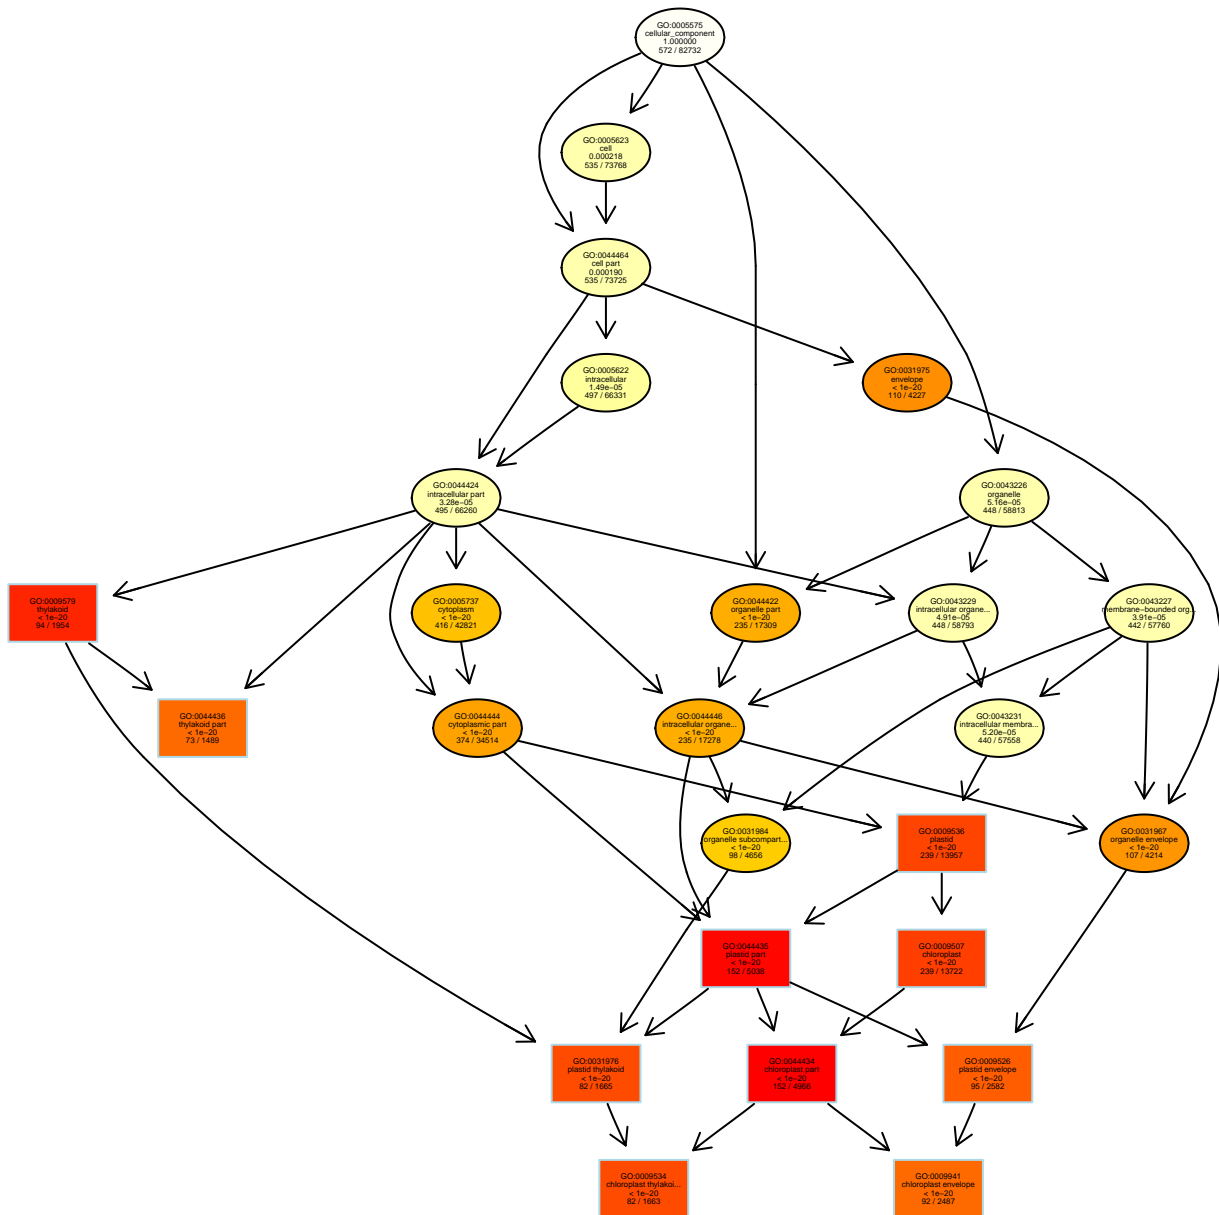

Supplement: s1 [file s1]

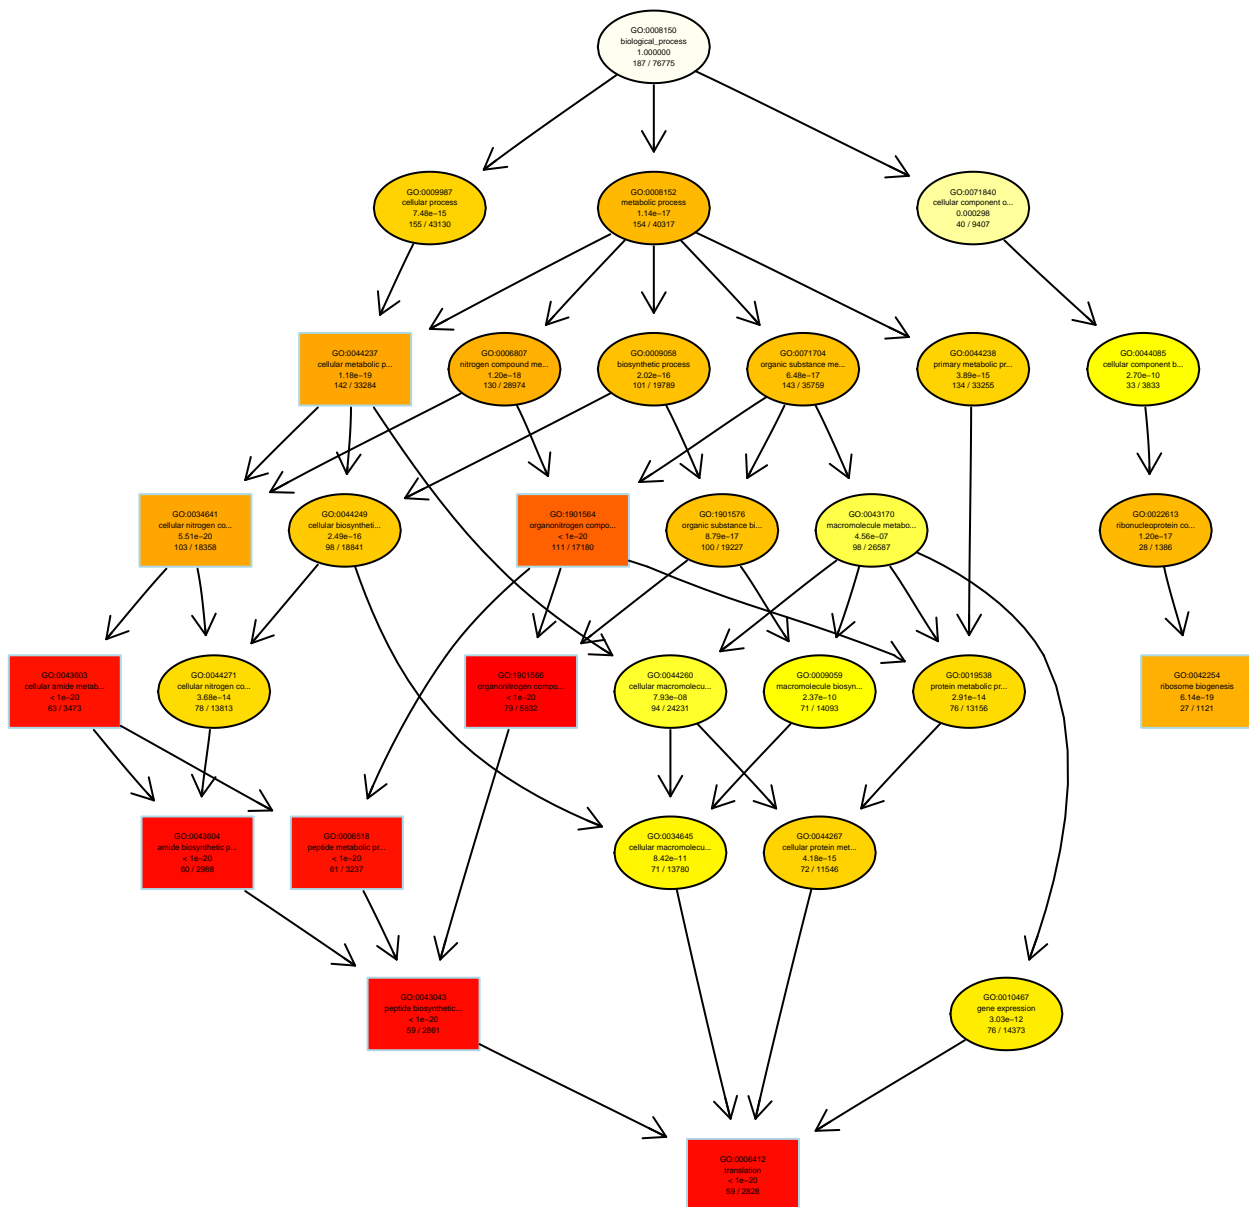

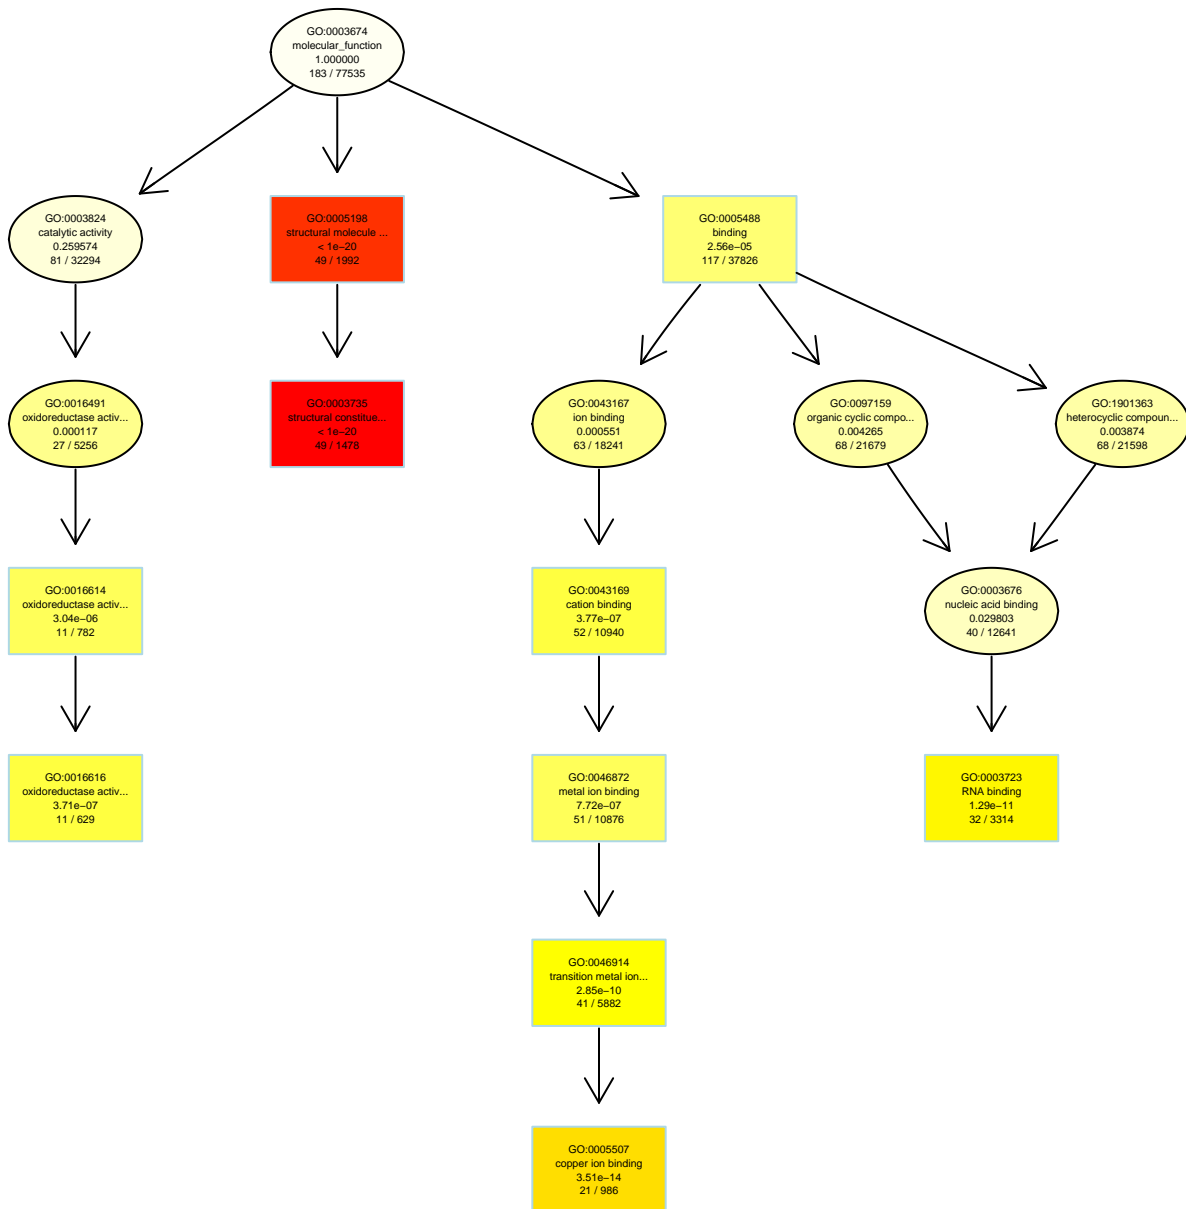

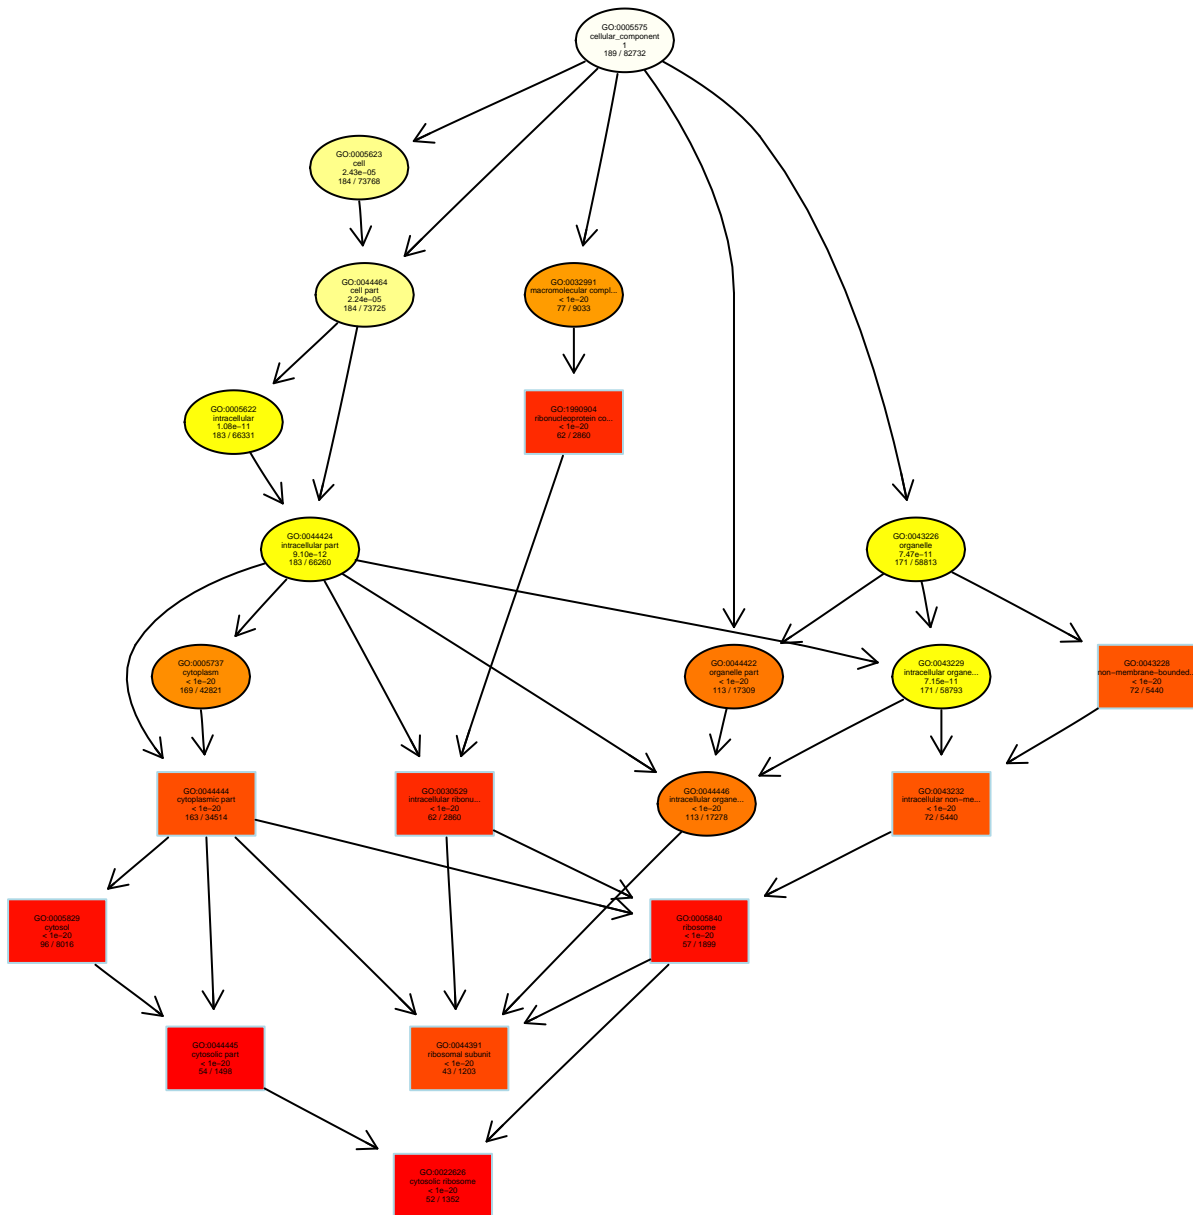

Supplement: s1 [file s1]

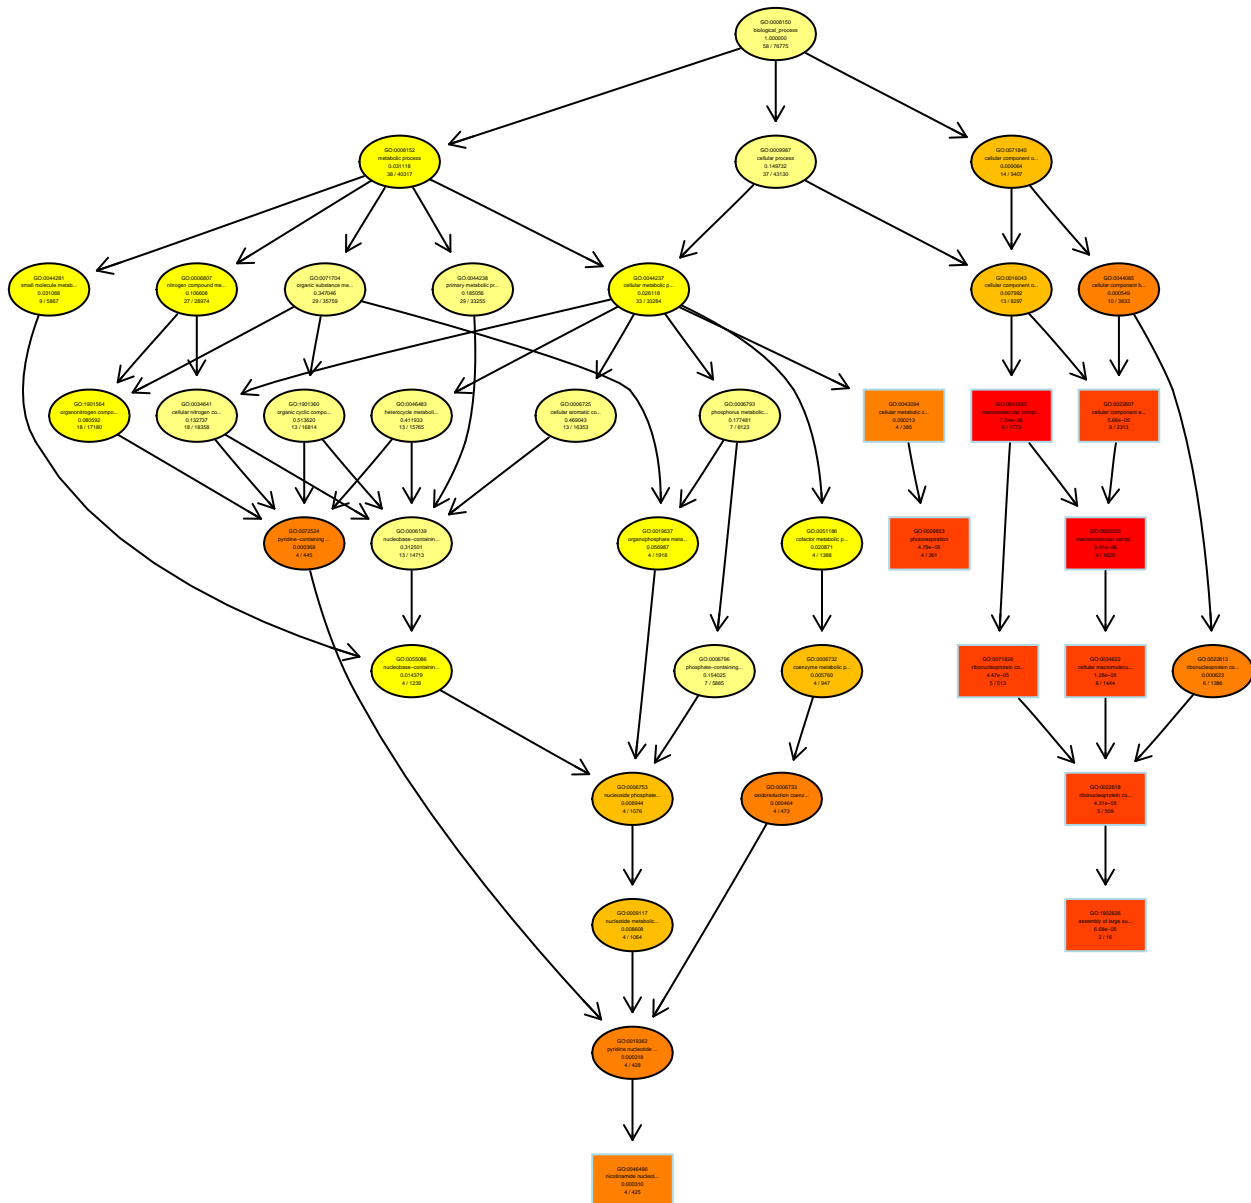

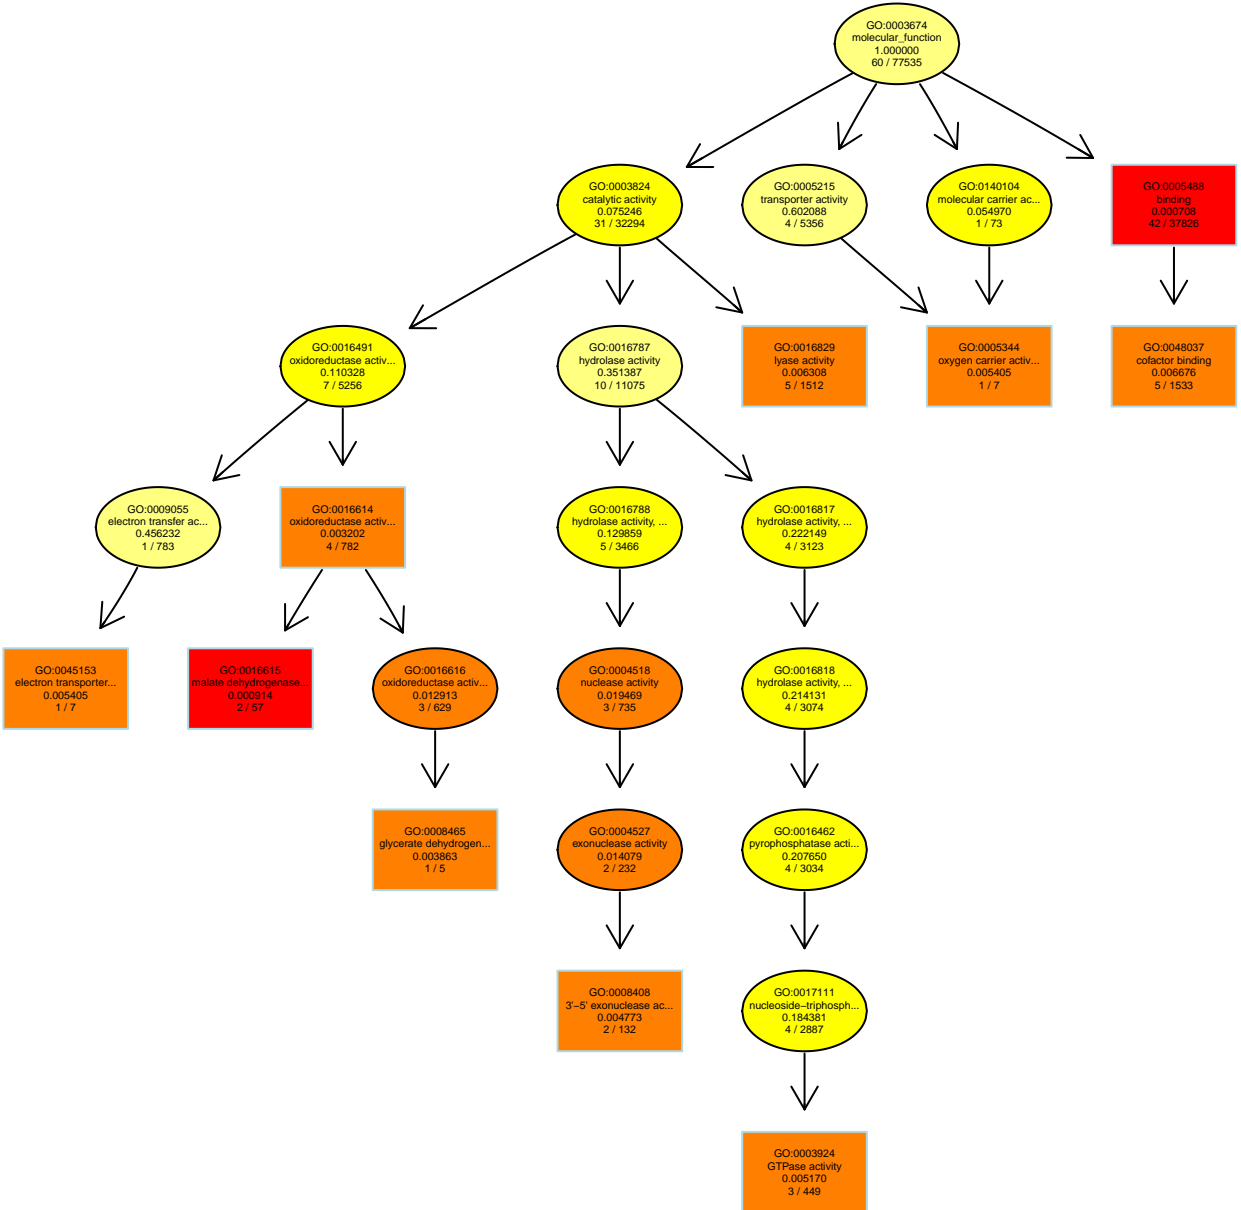

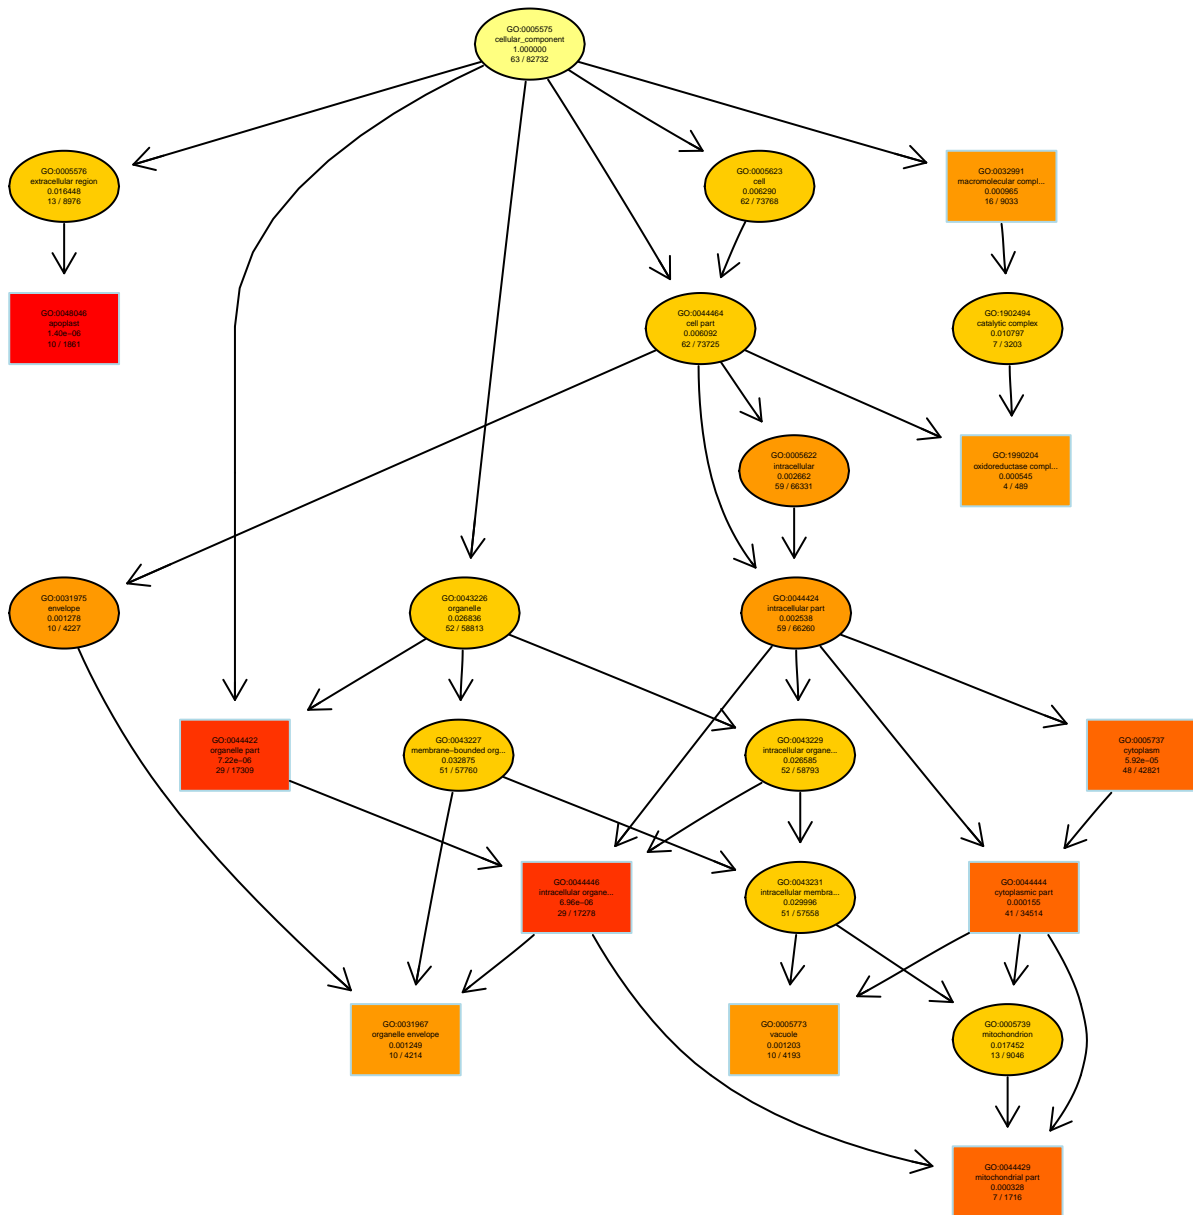

Supplement: s1 [file s1]

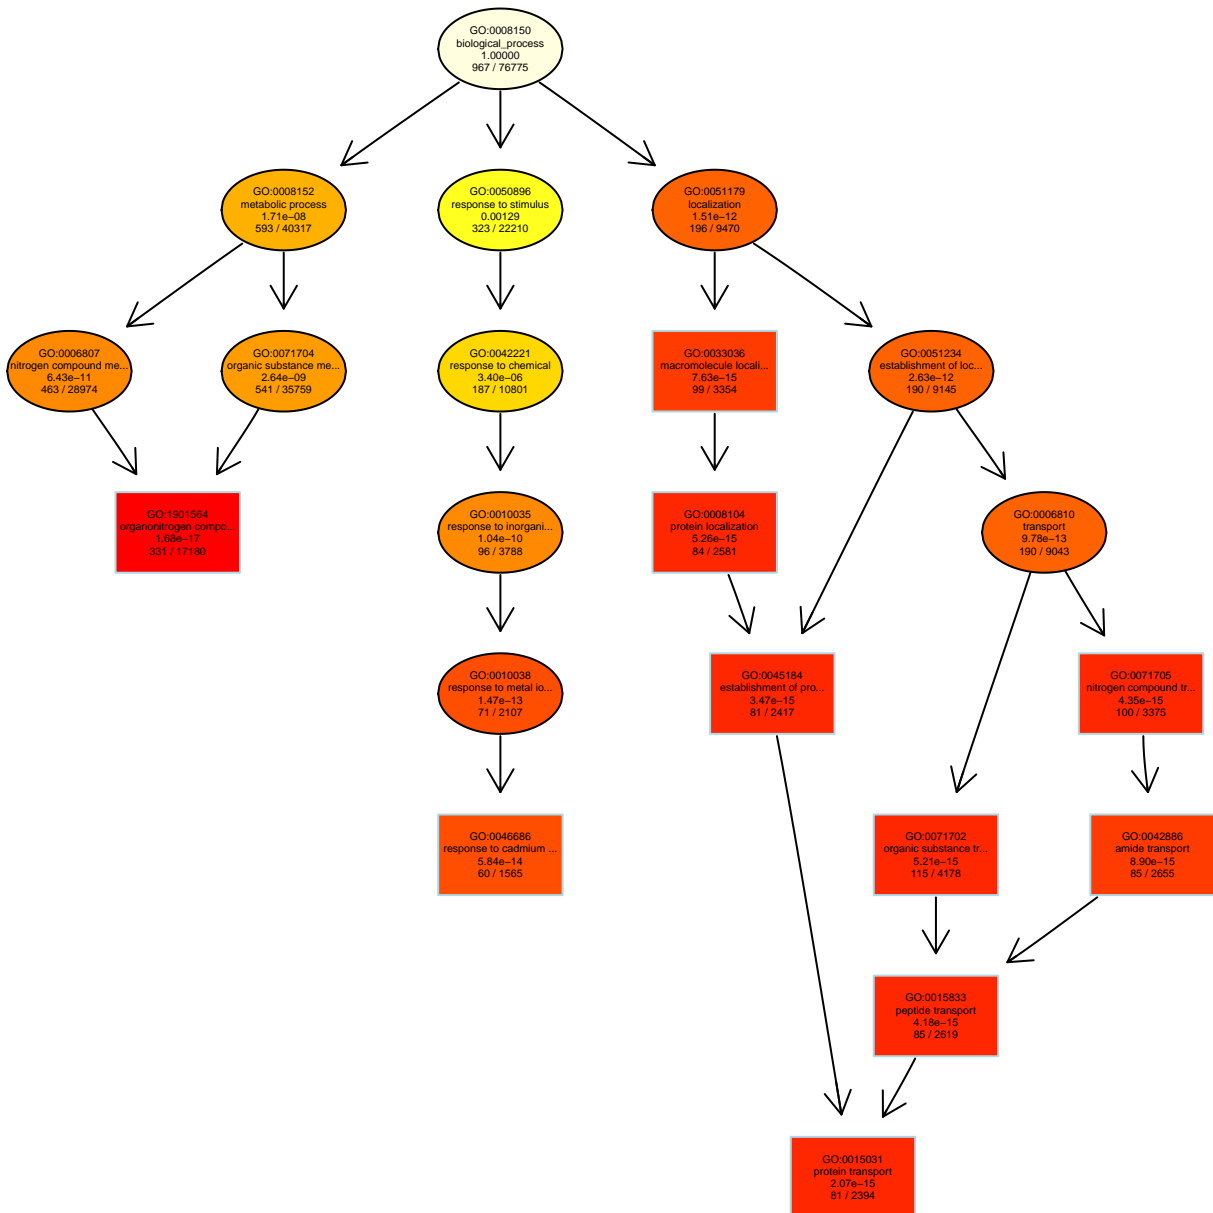

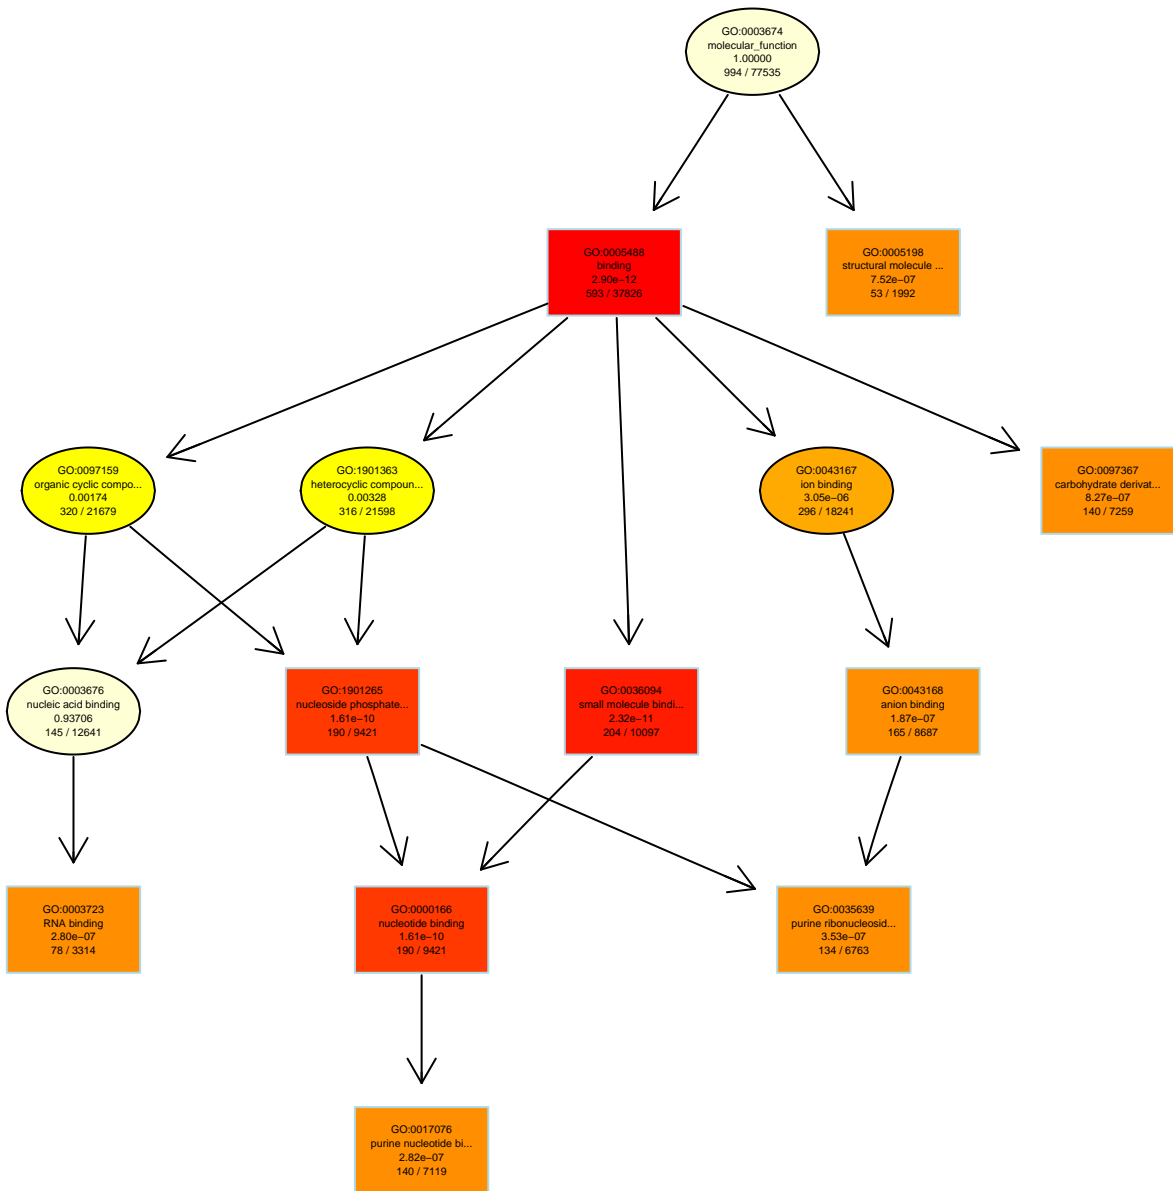

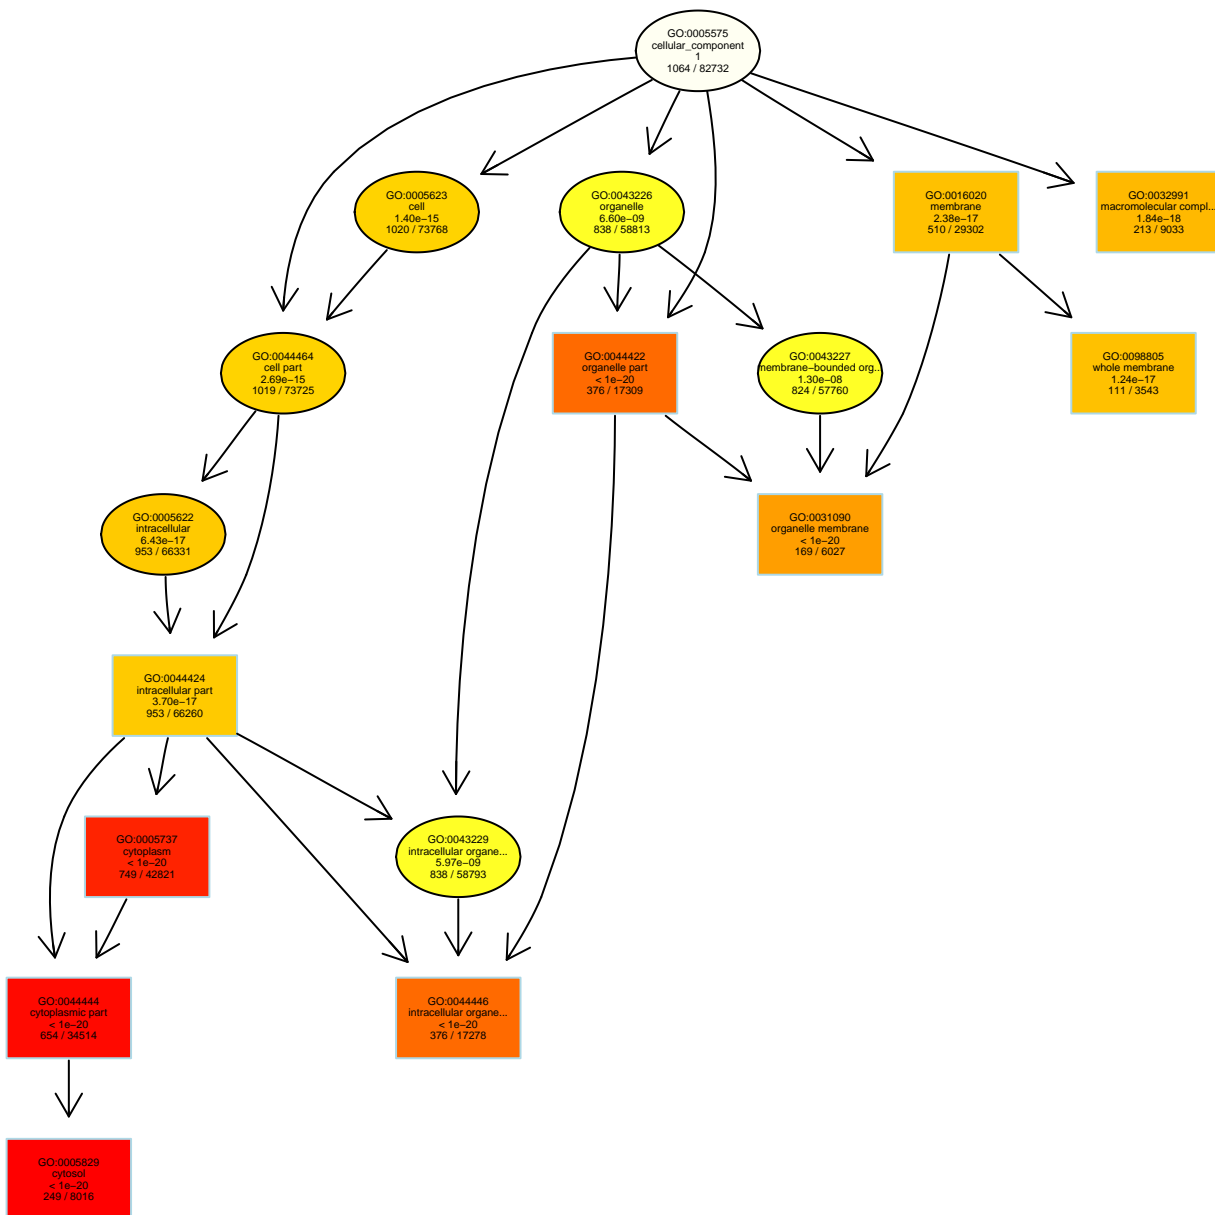

Supplement: s1 [file s1]

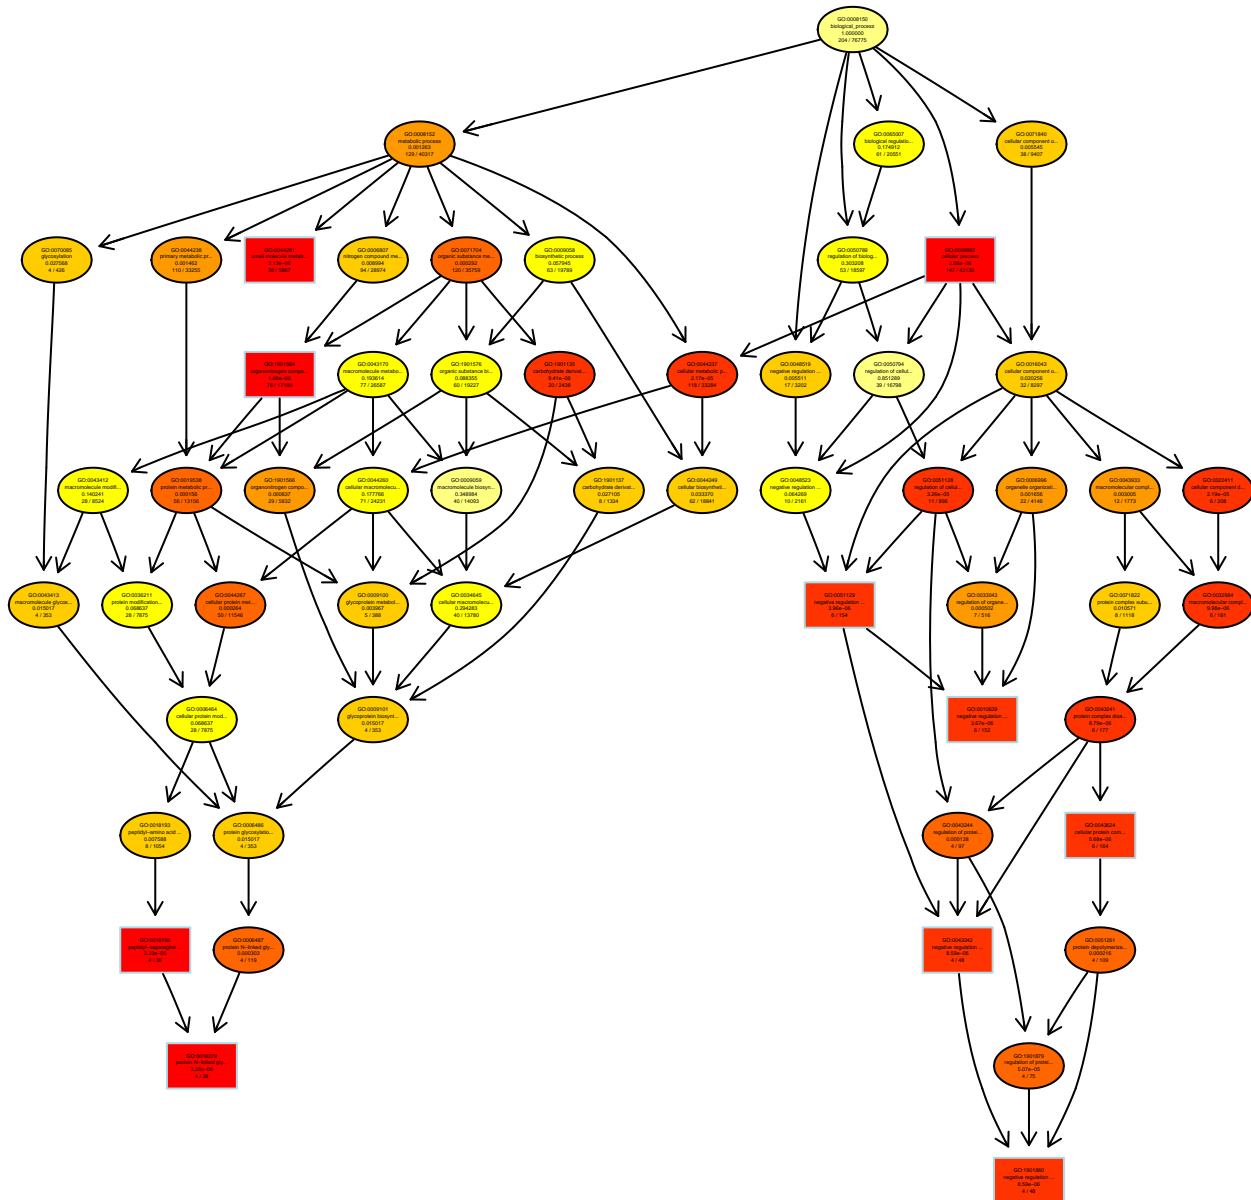

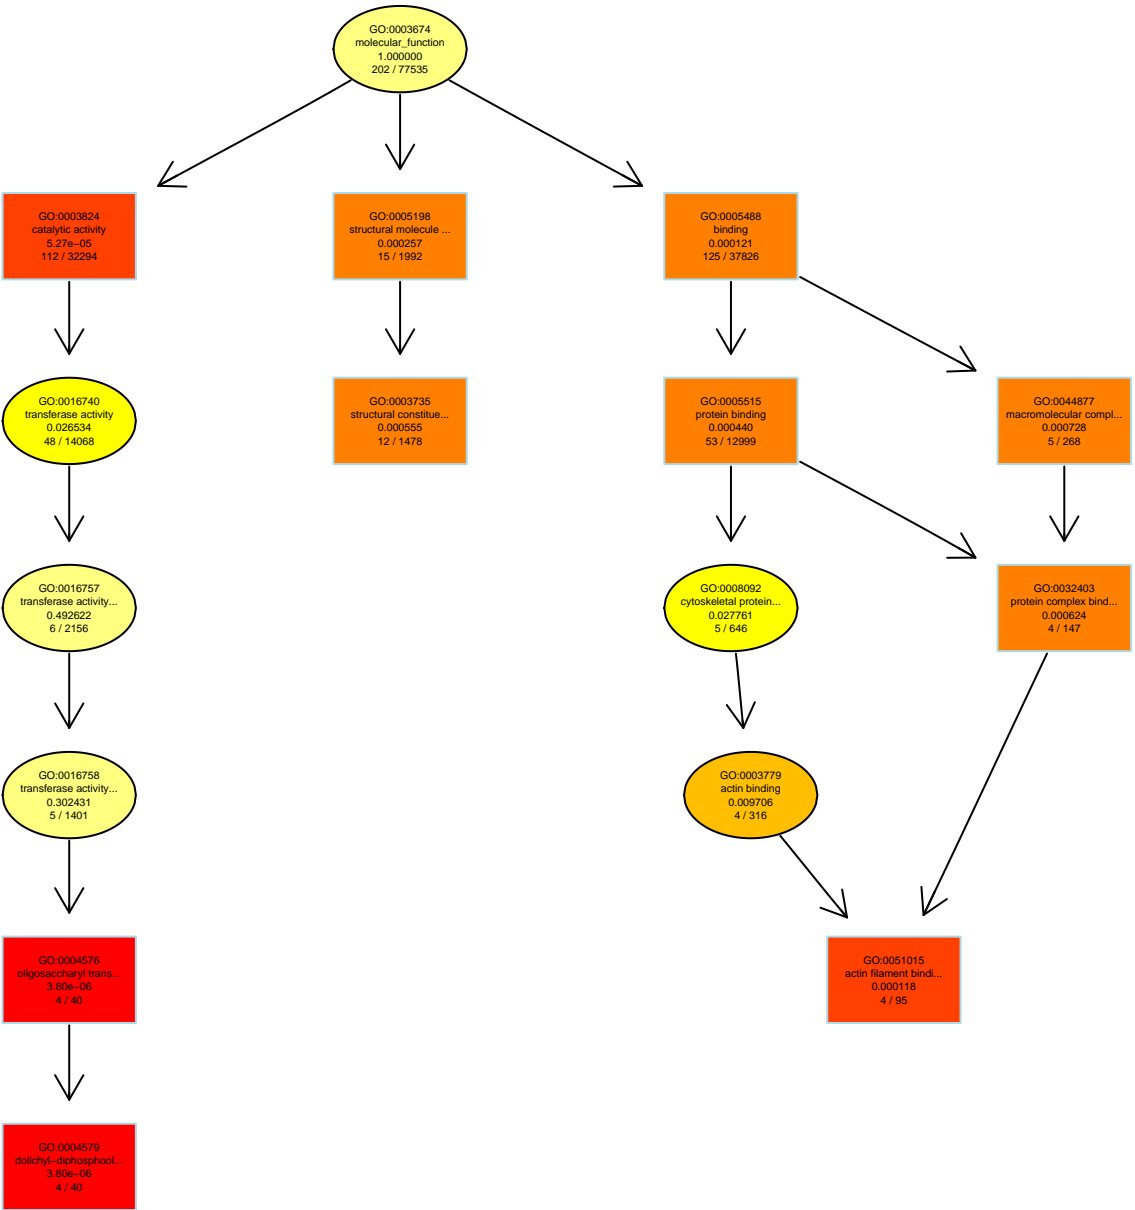

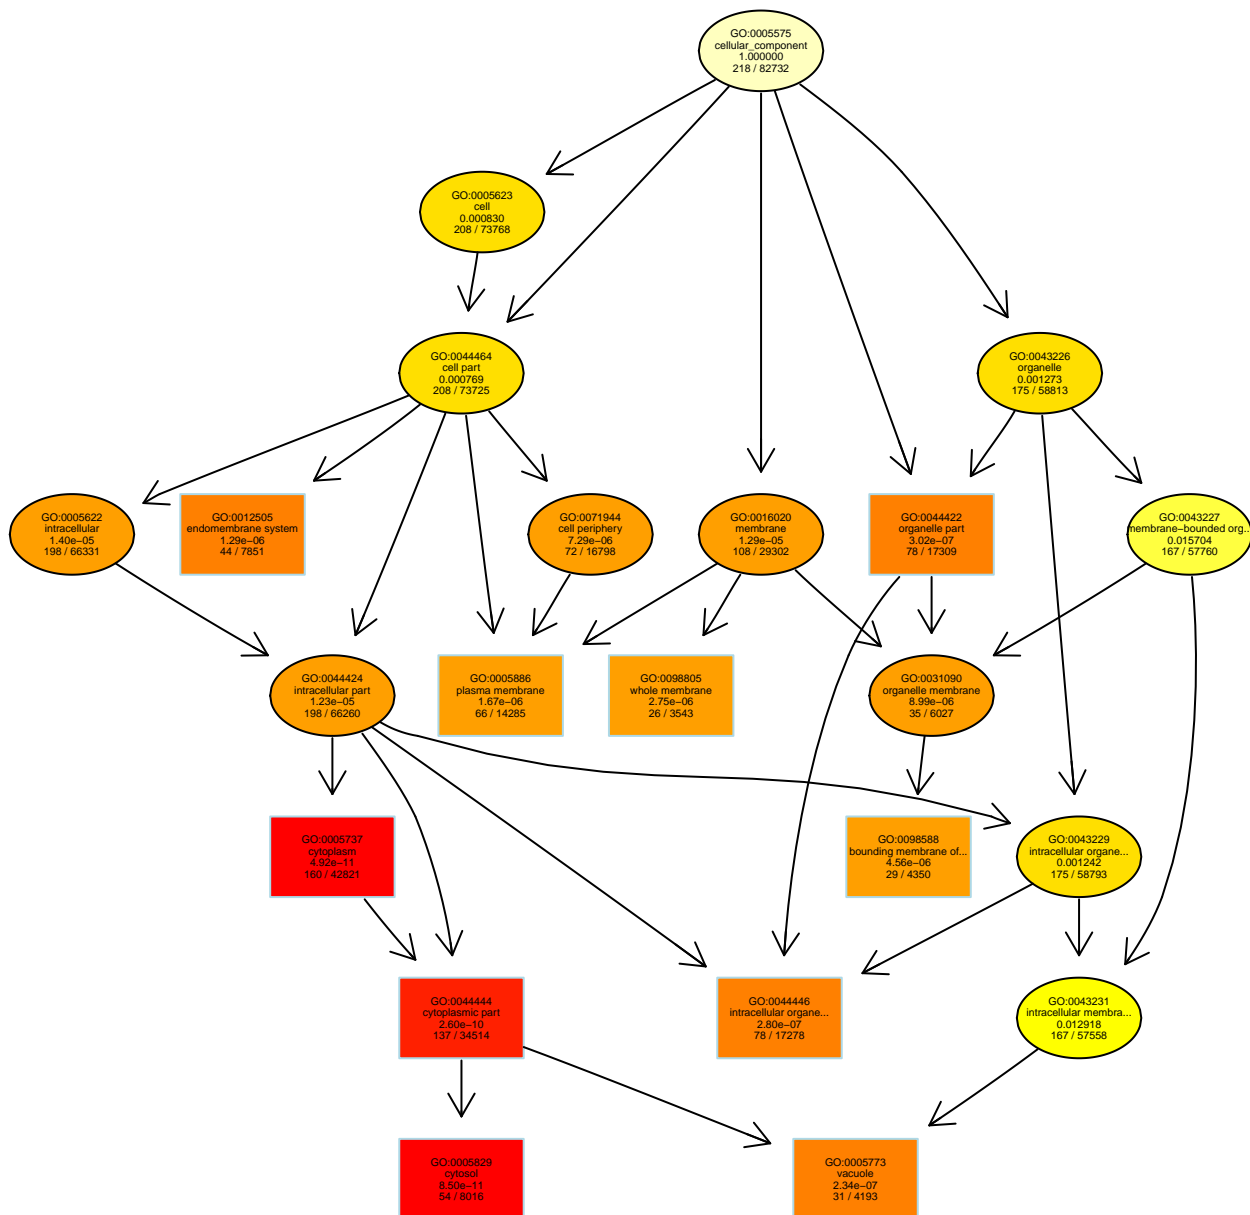

Supplement: s1 [file s1]

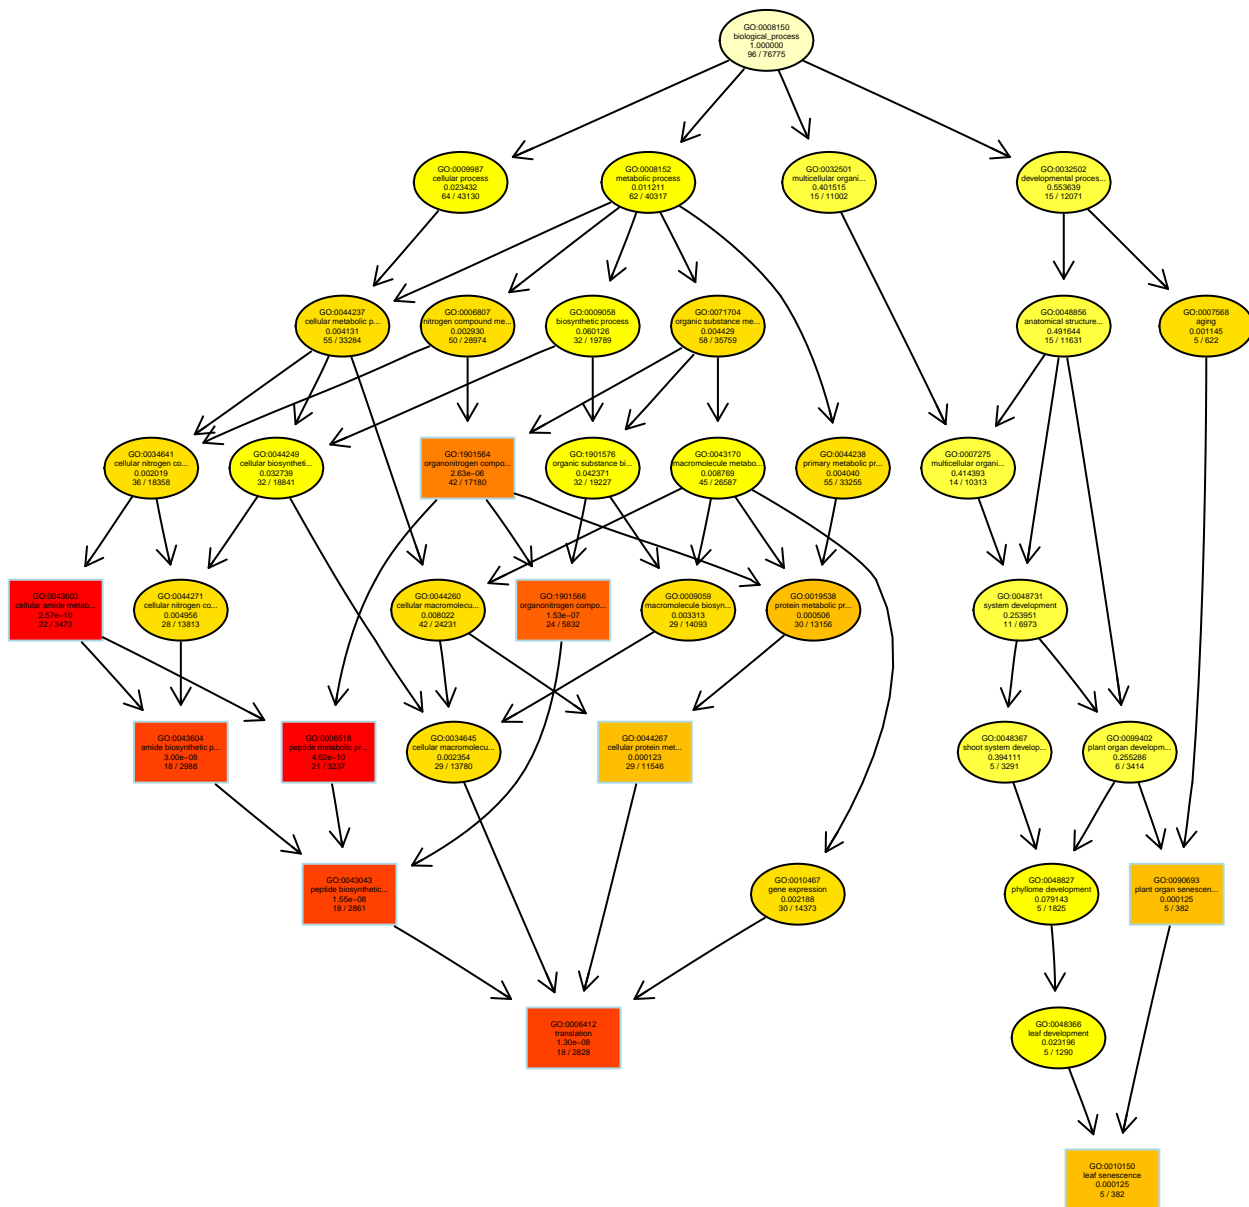





Supplement: s1 [file s1]

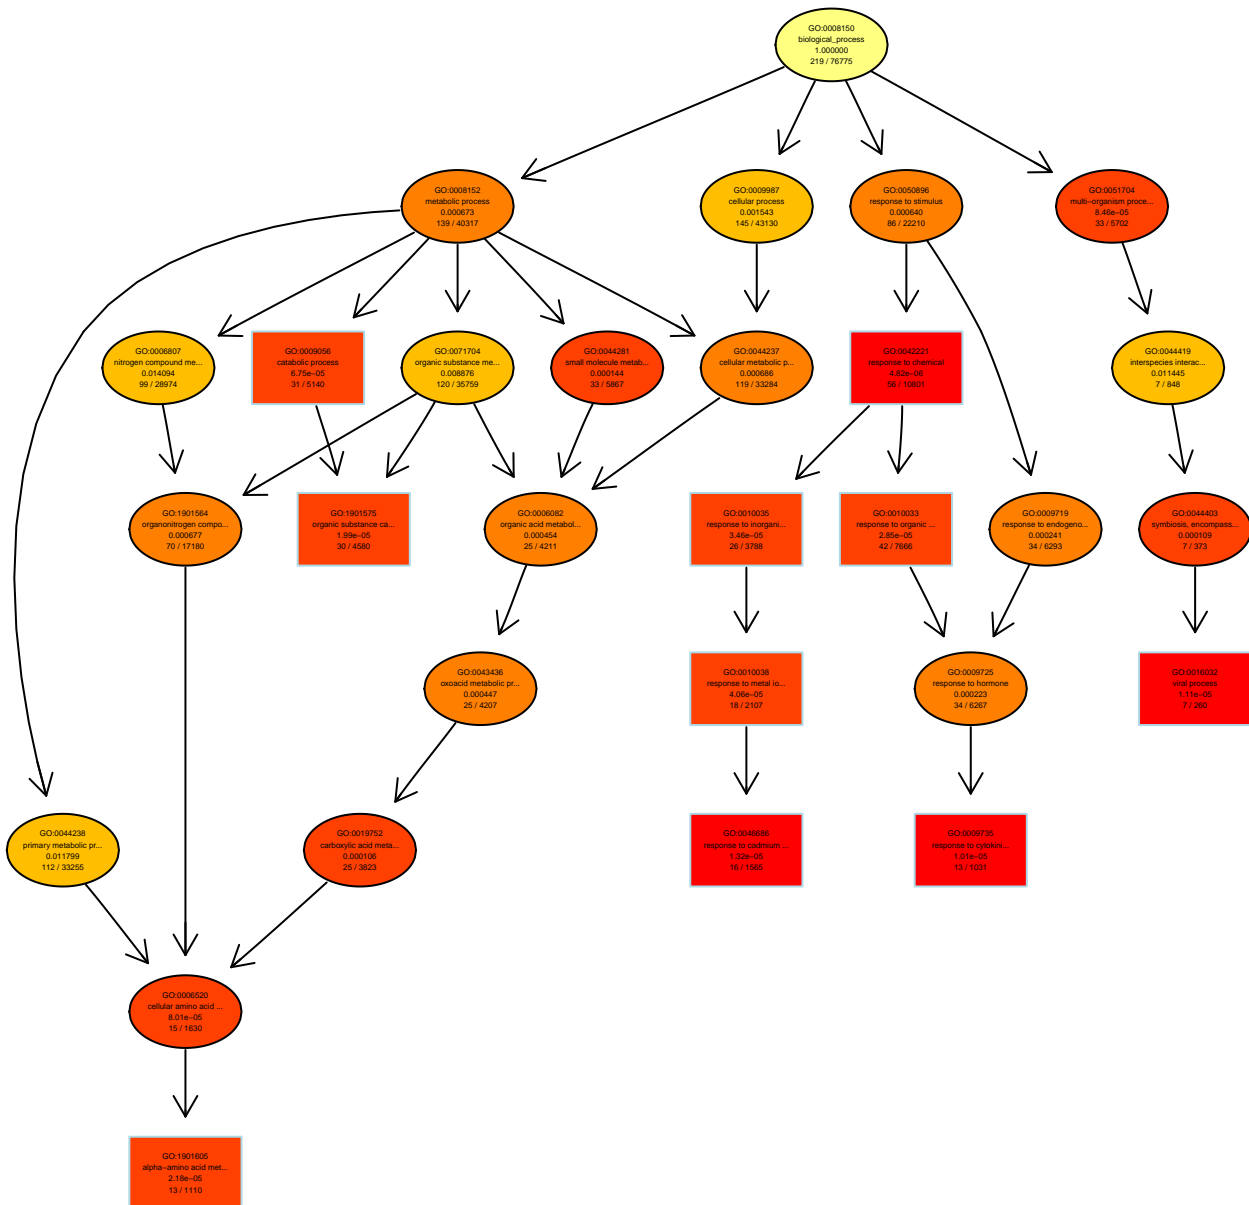

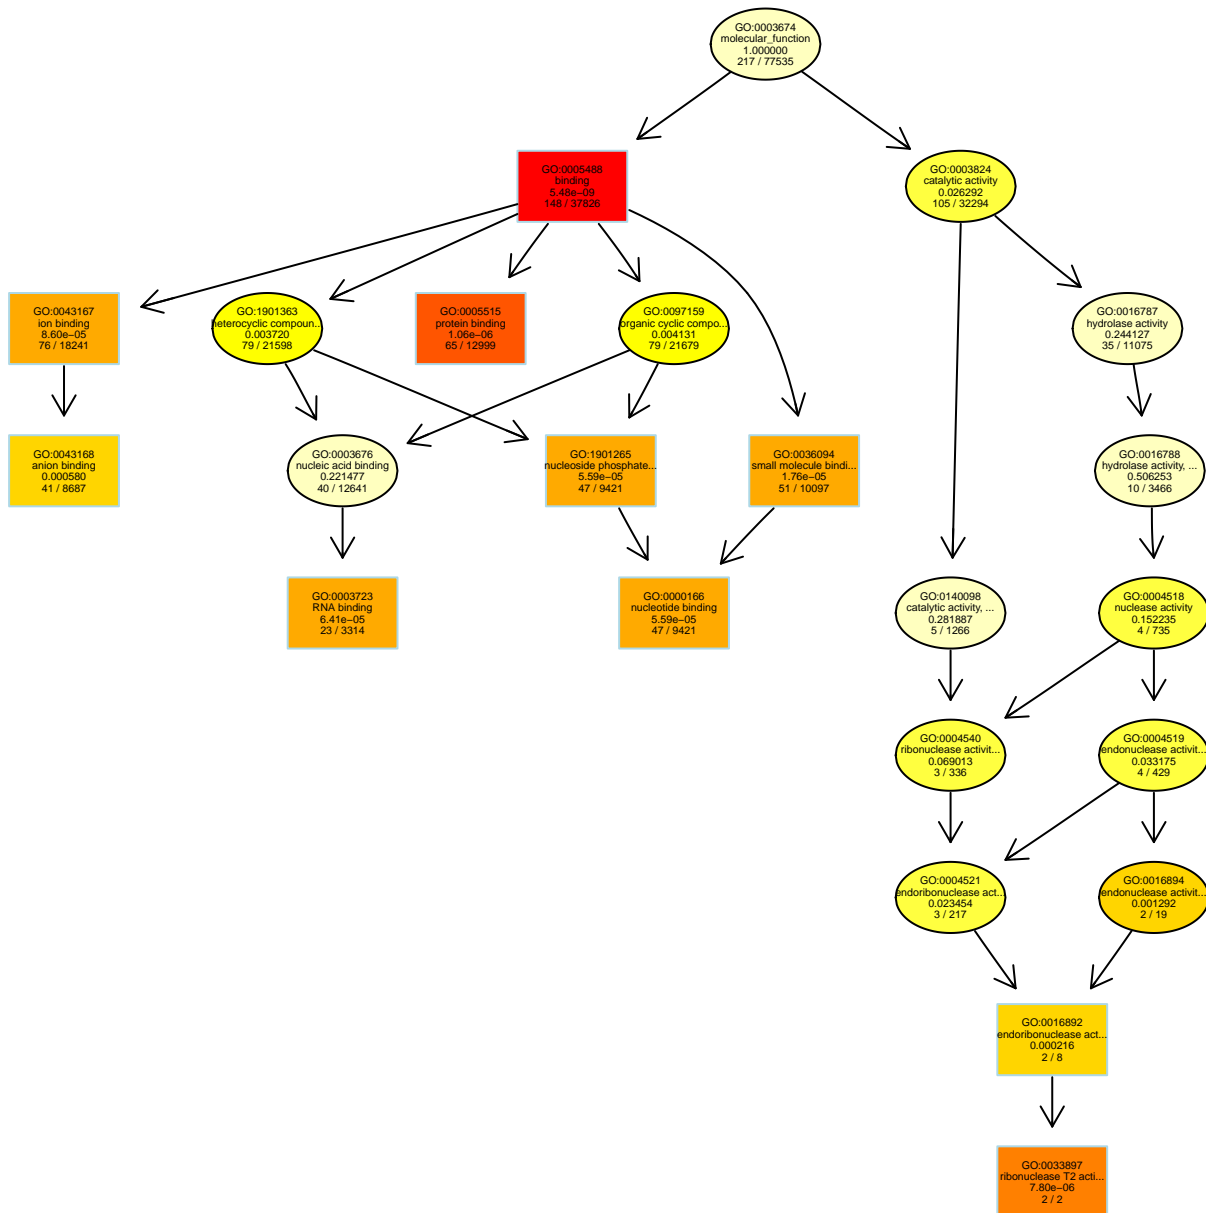

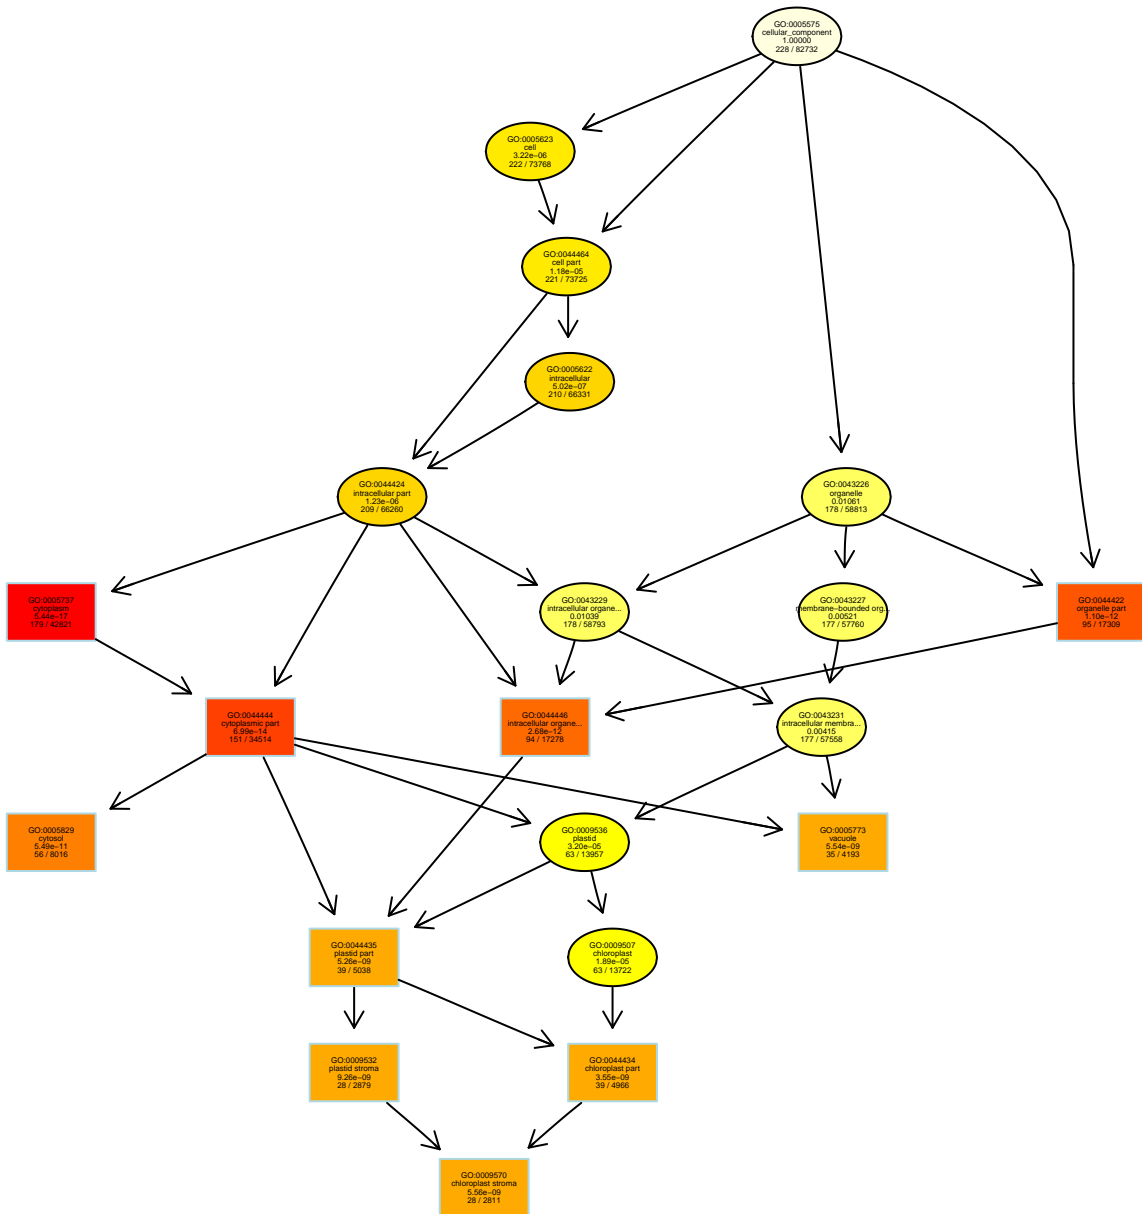

Supplement: s1 [file s1]

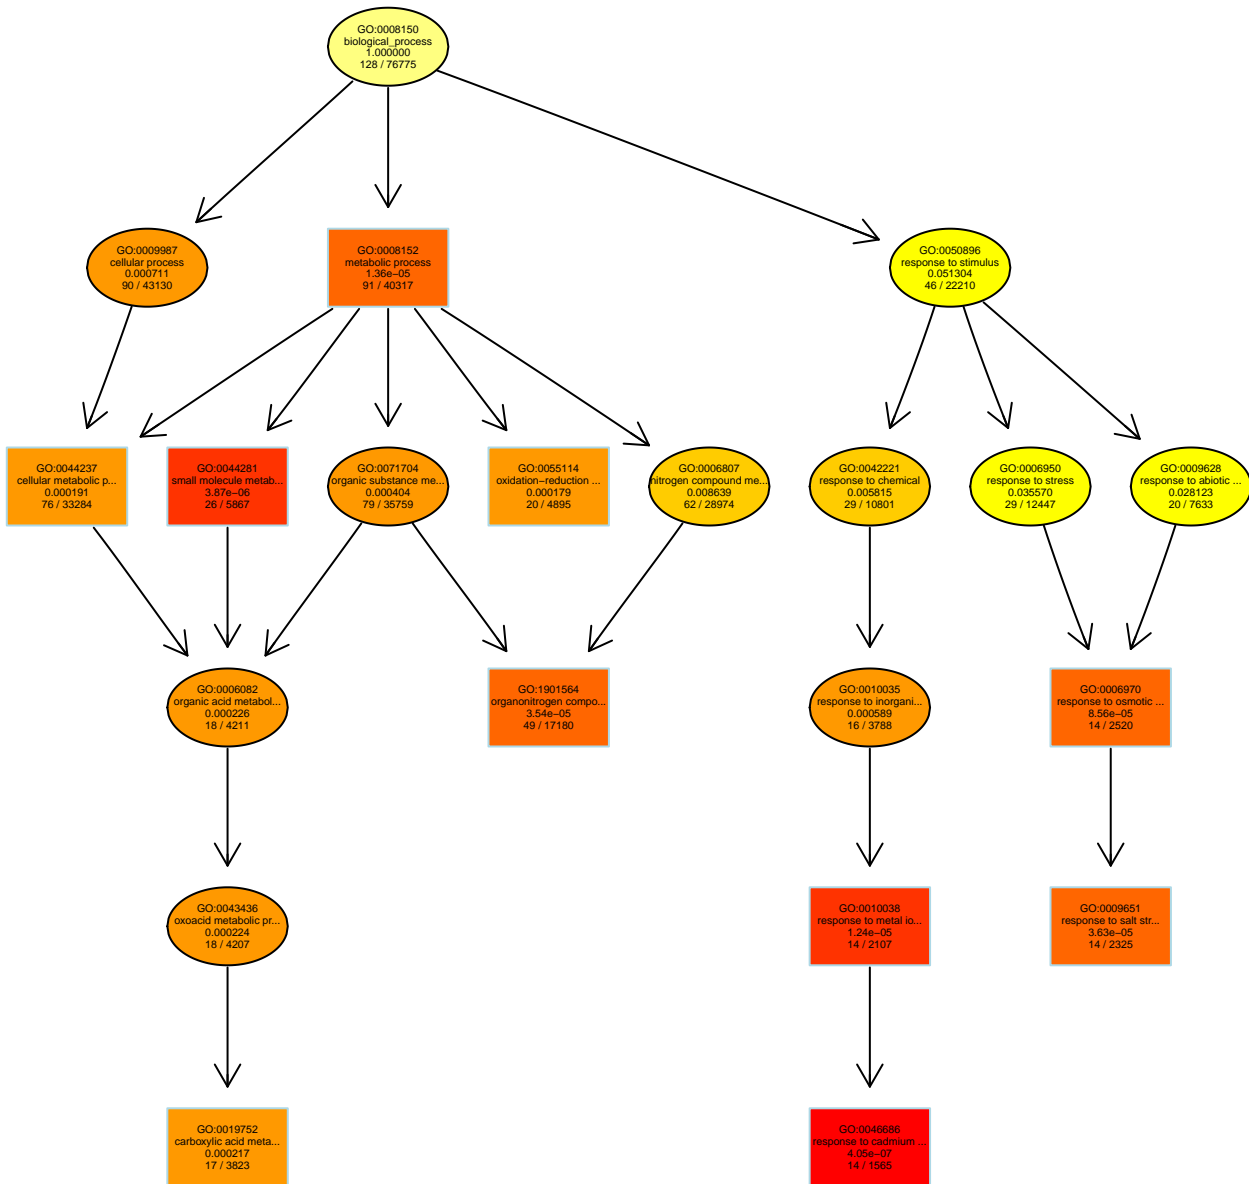

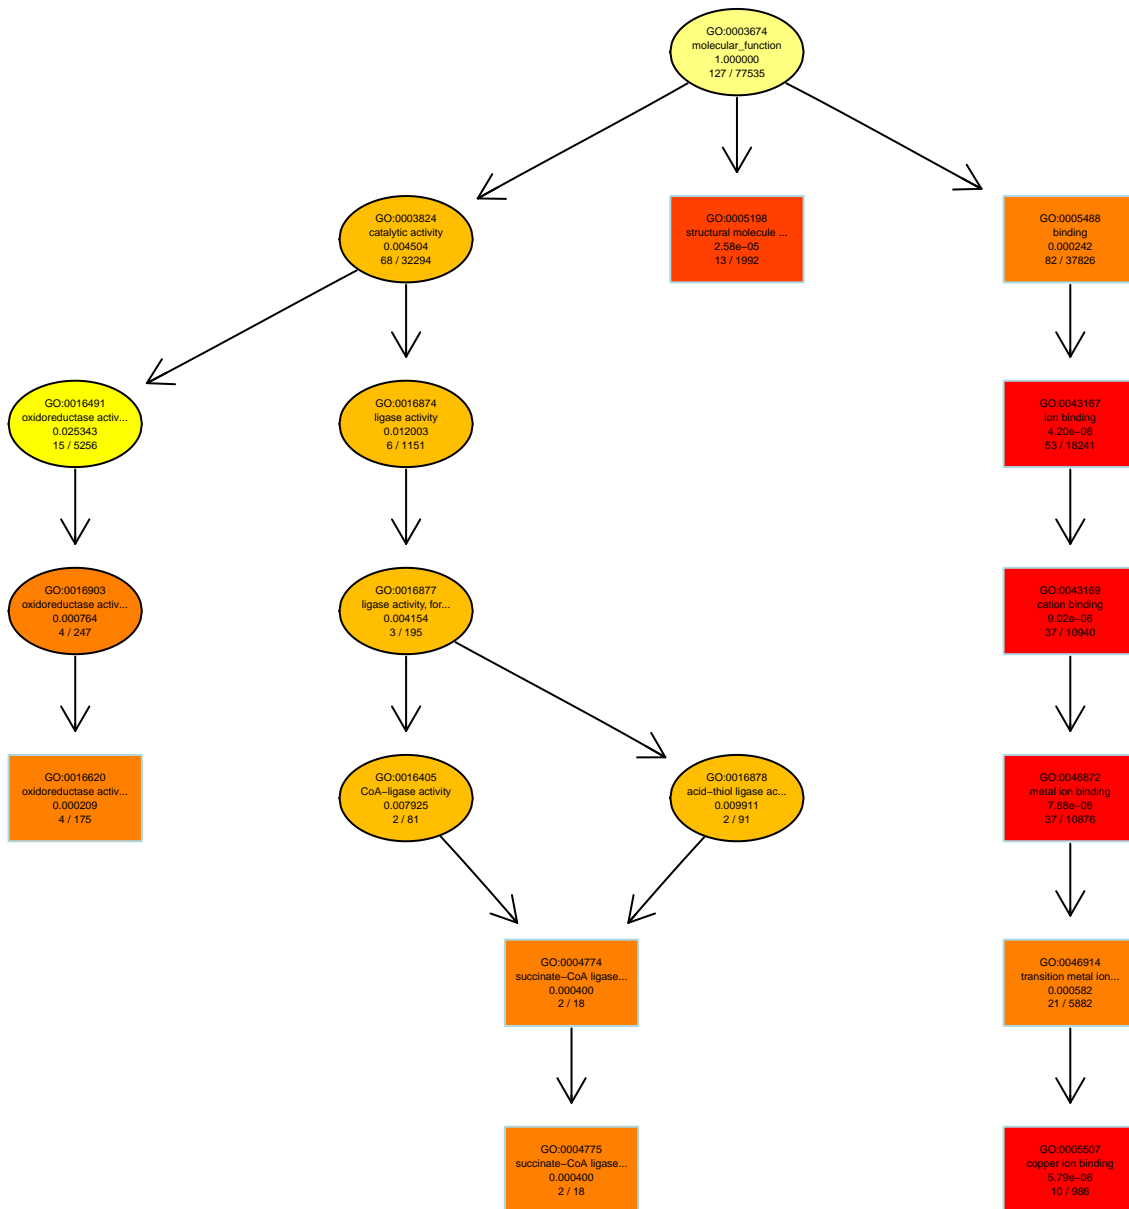

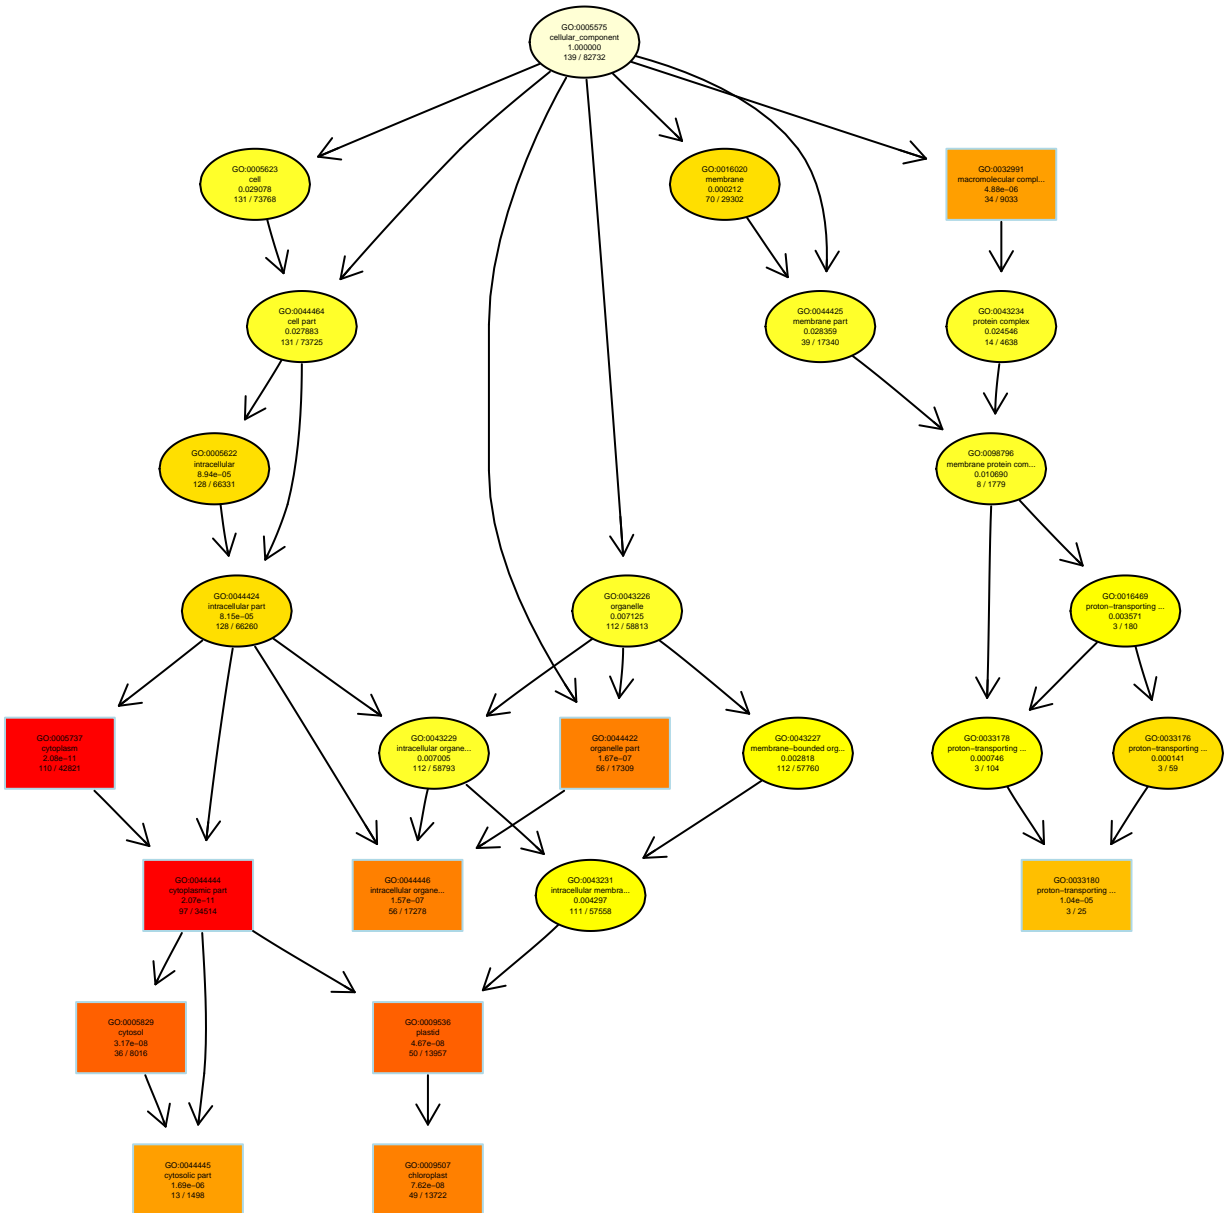

Supplement: s1 [file s1]

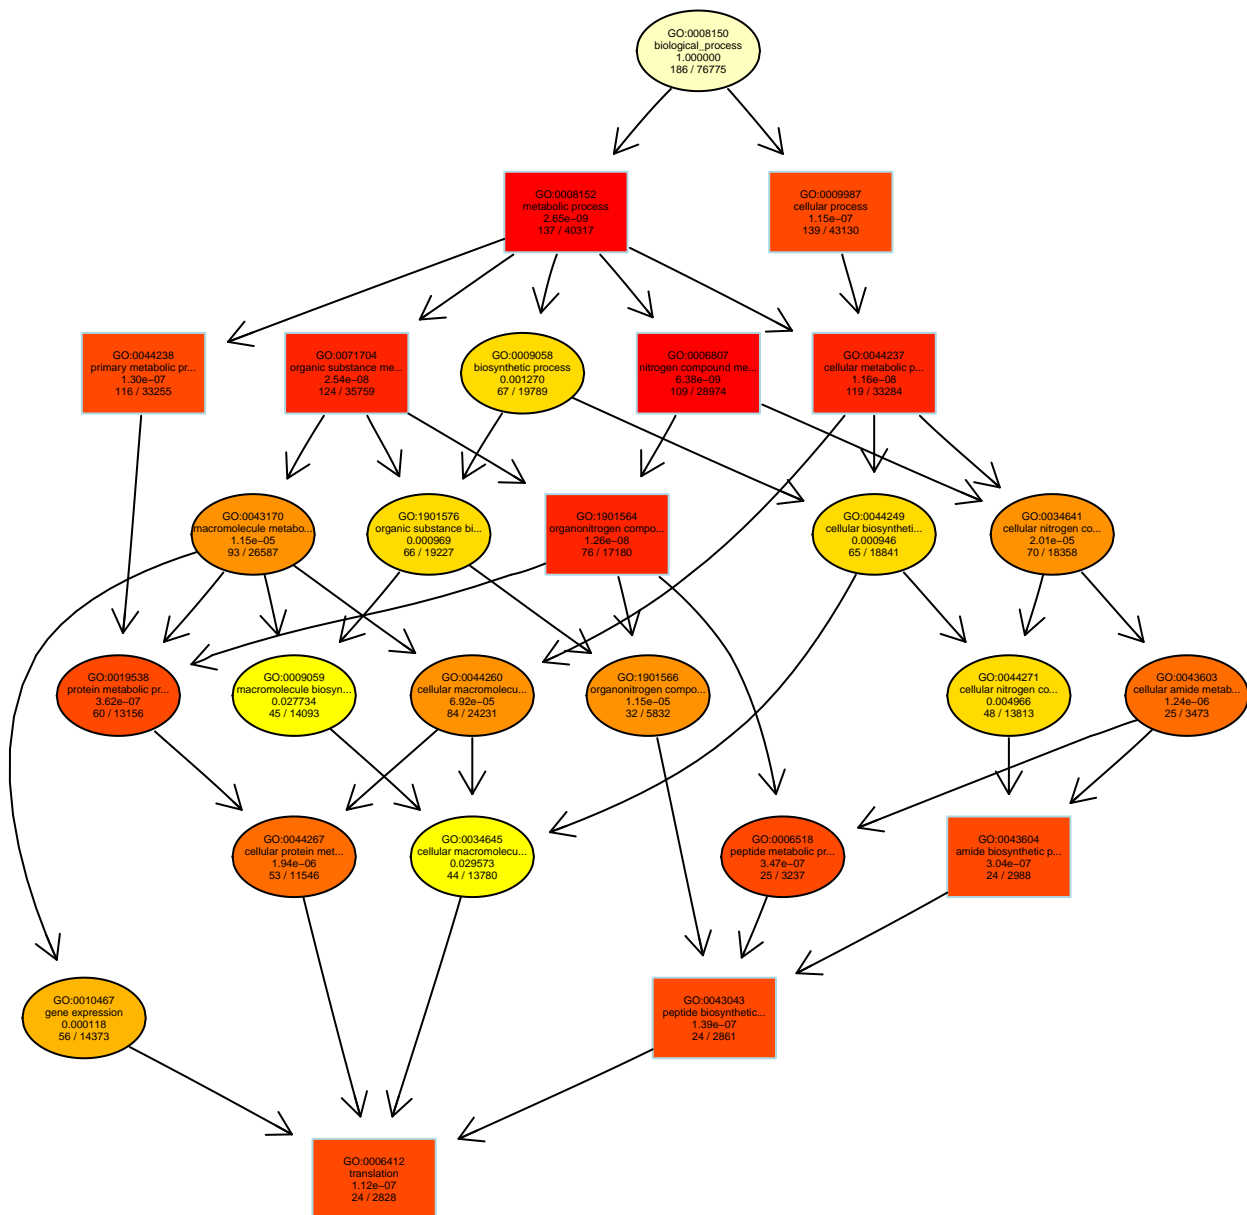

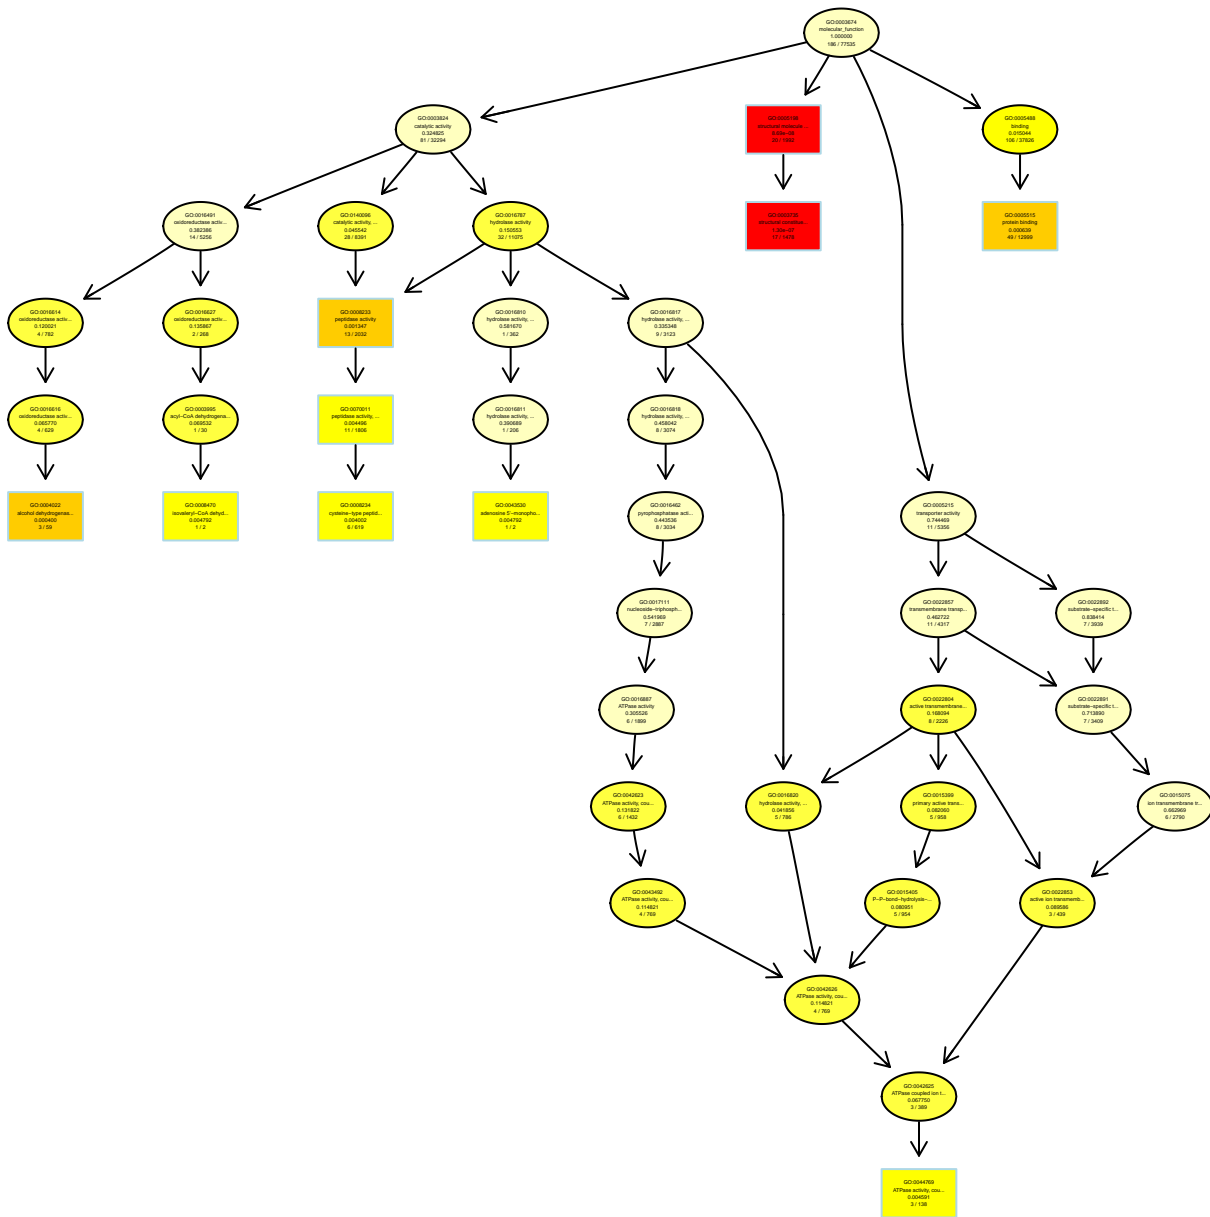

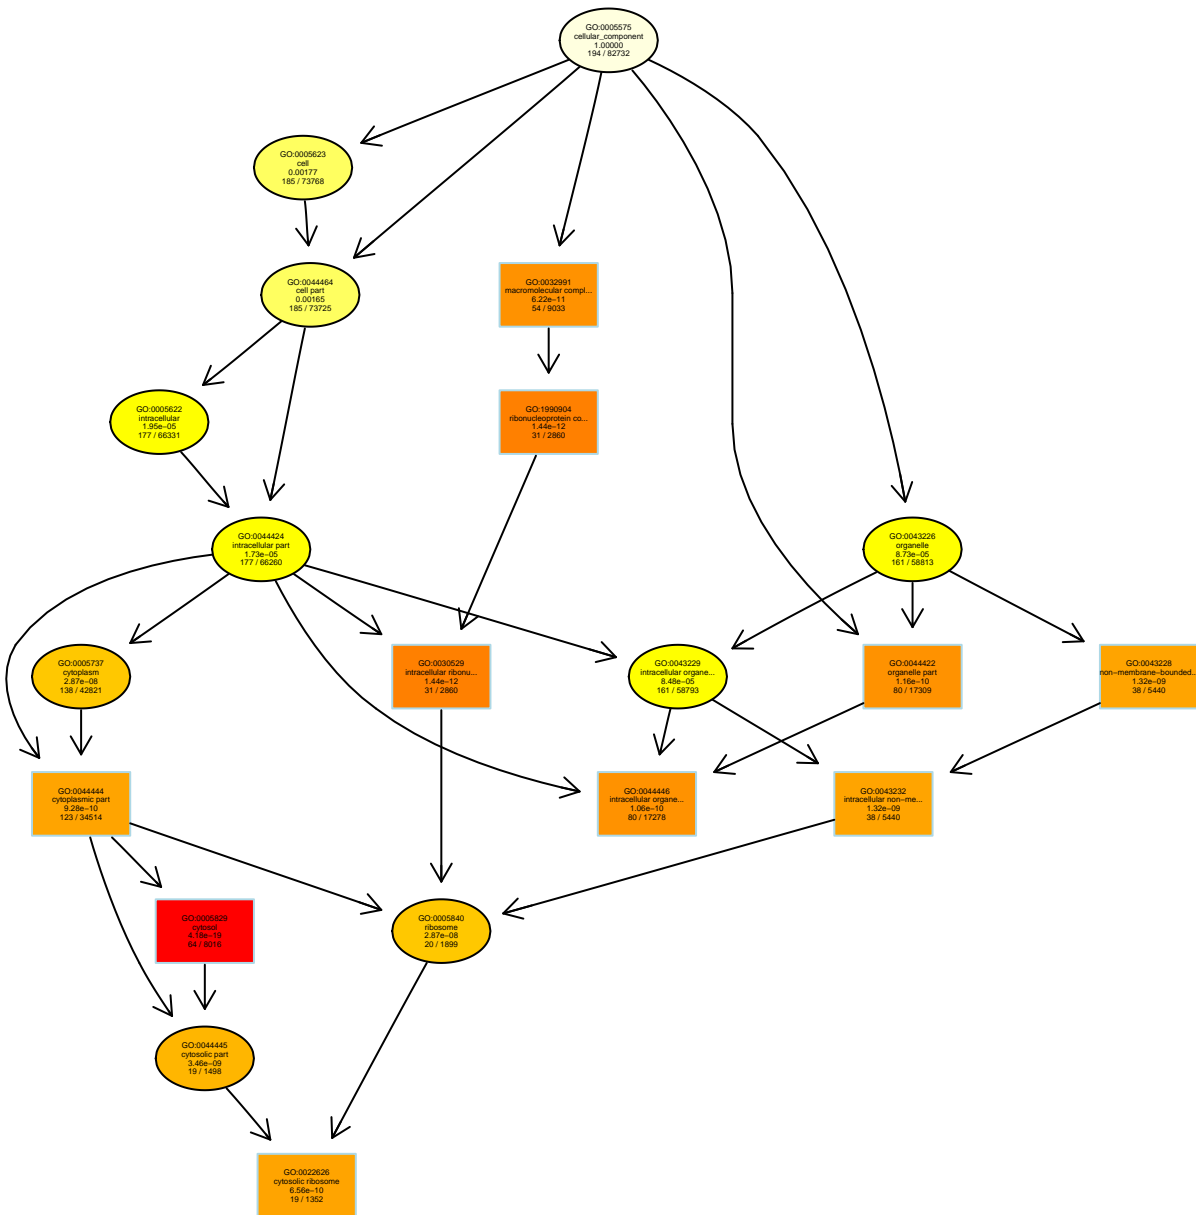

Supplement: s1 [file s1]

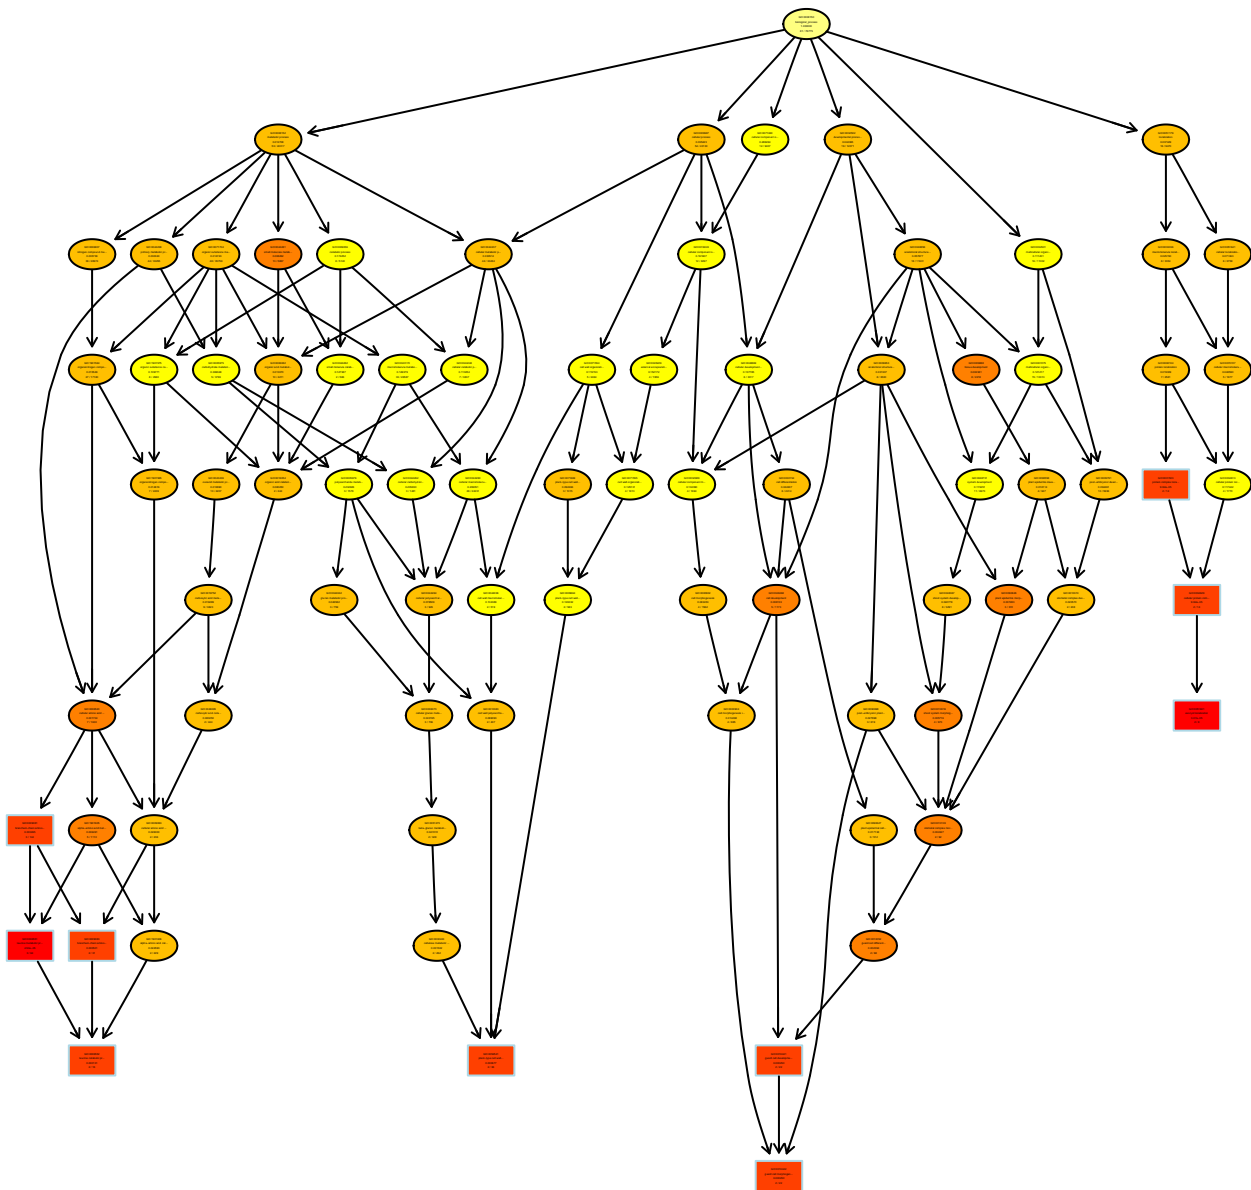

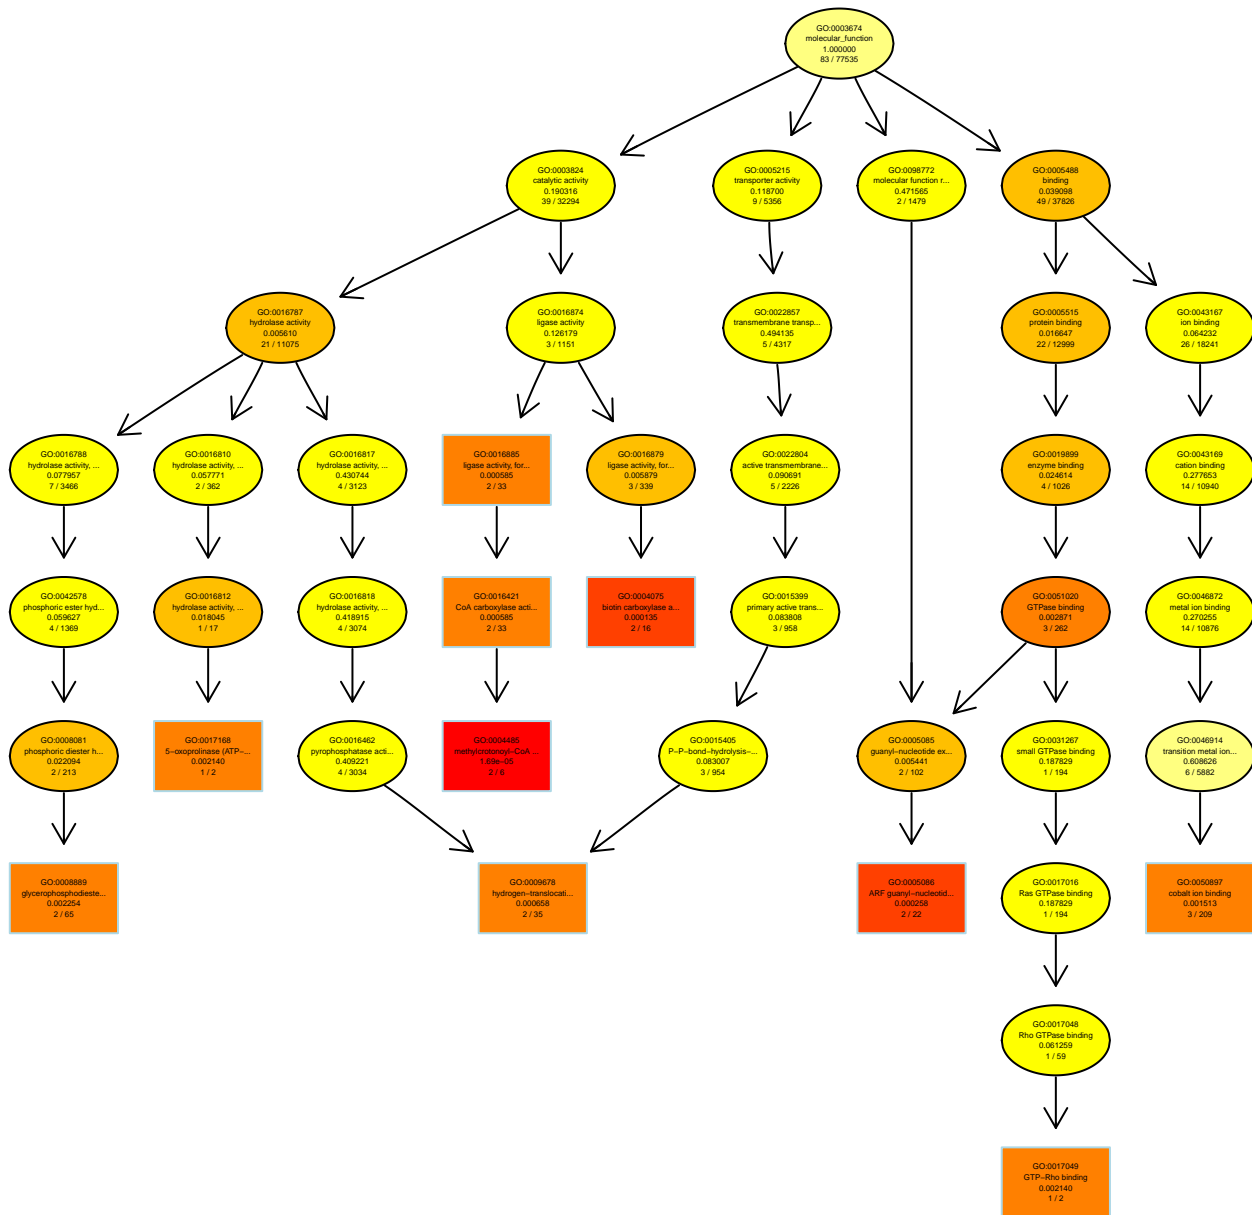

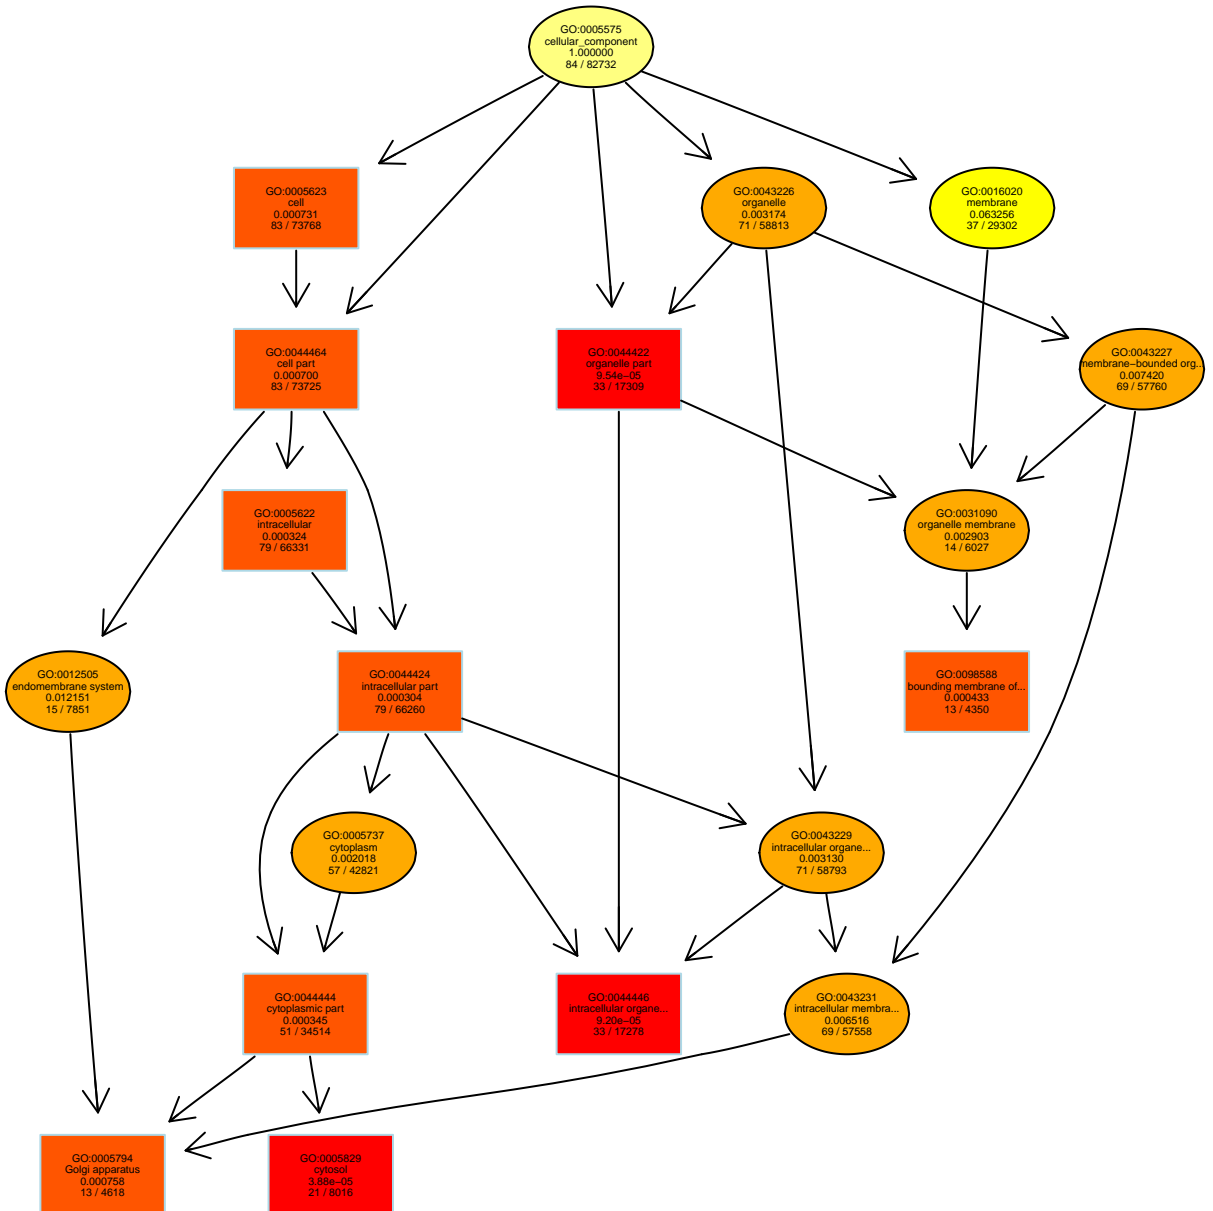

Supplement: s1 [file s1]

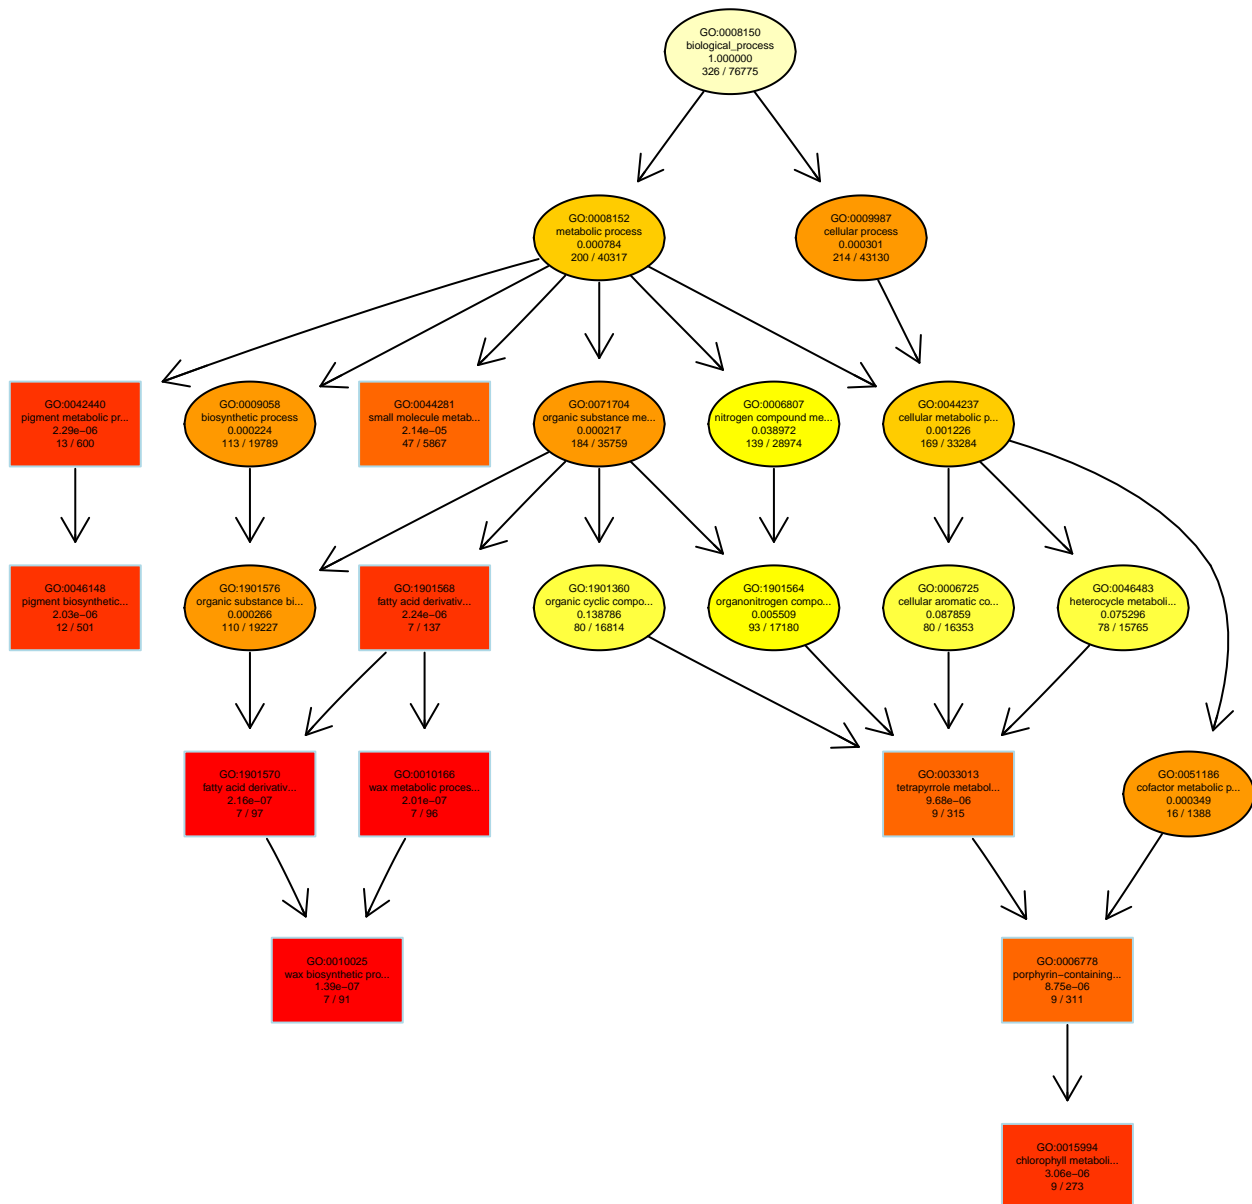

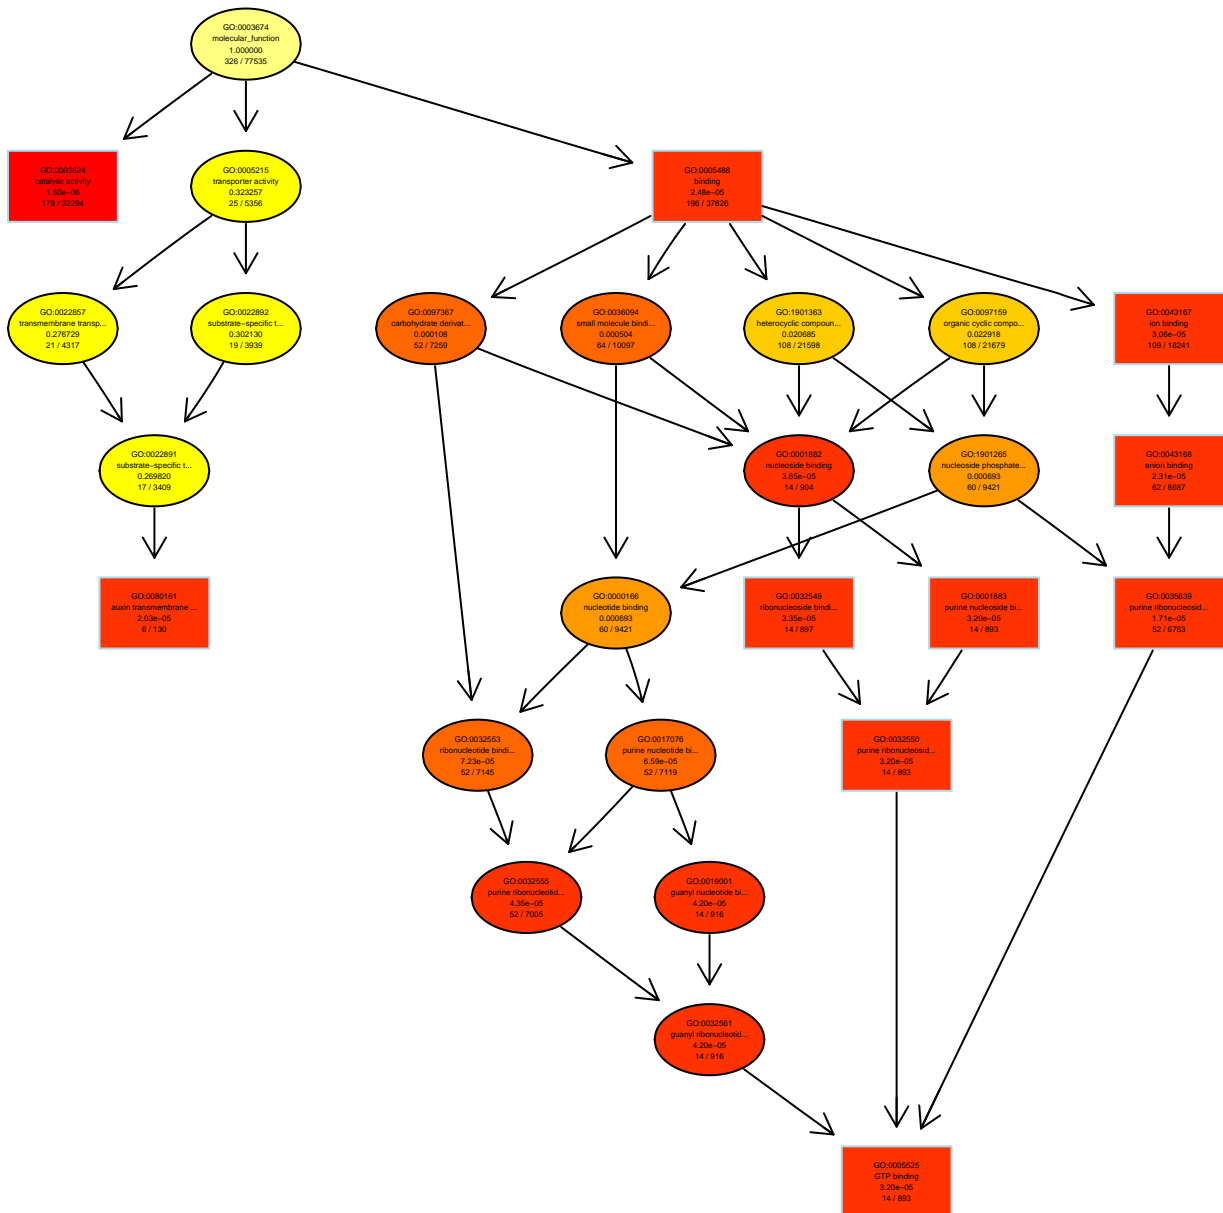

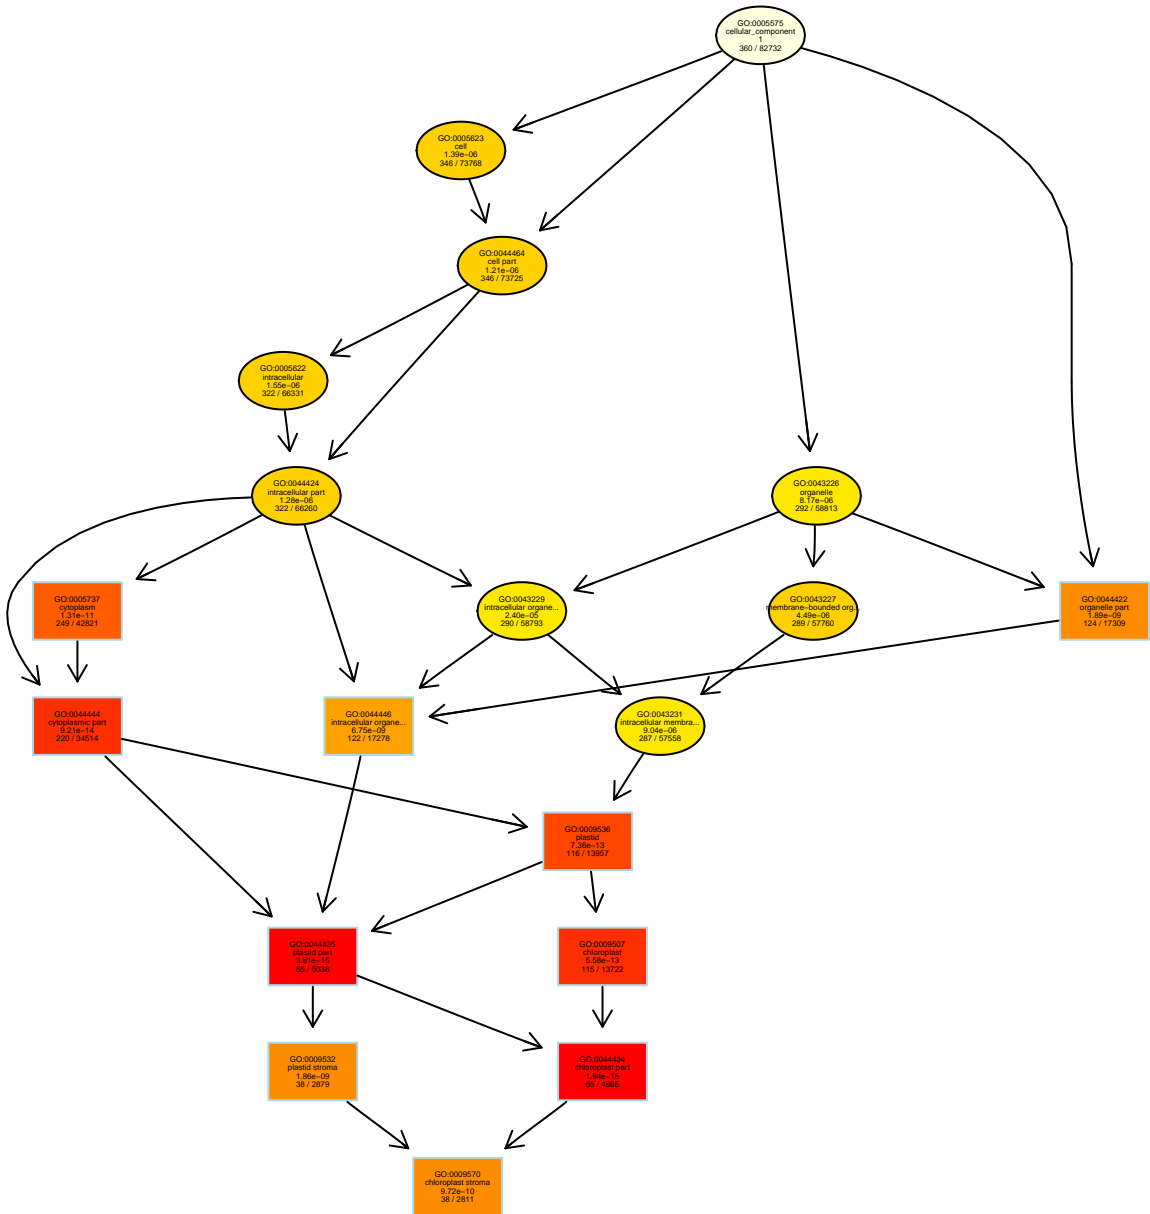

Supplement: s1 [file s1]

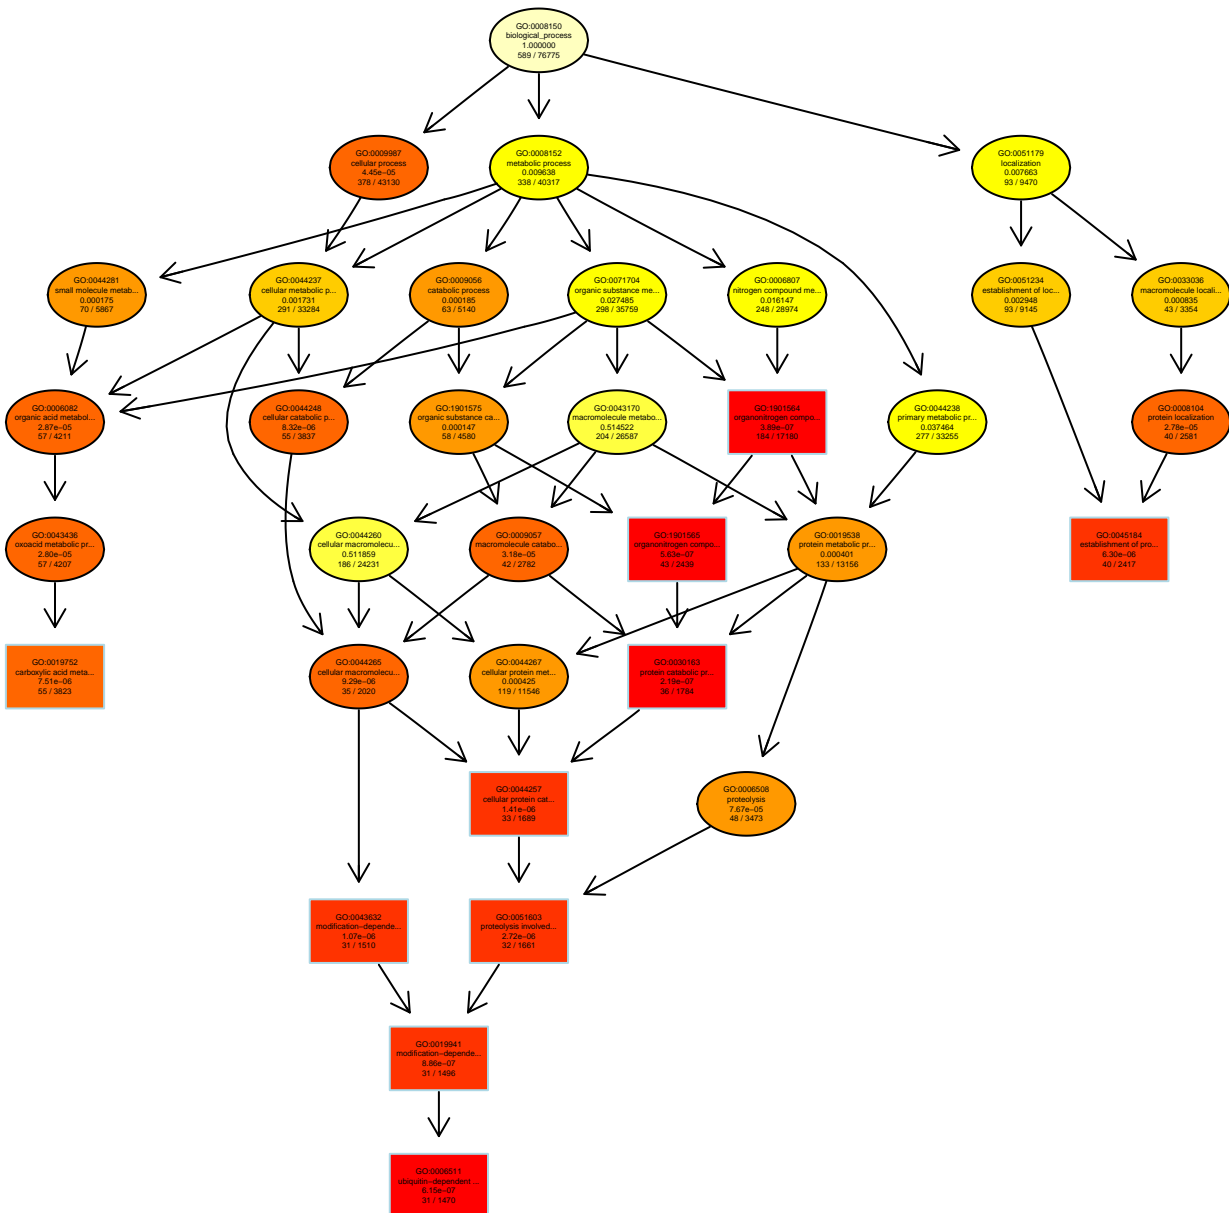

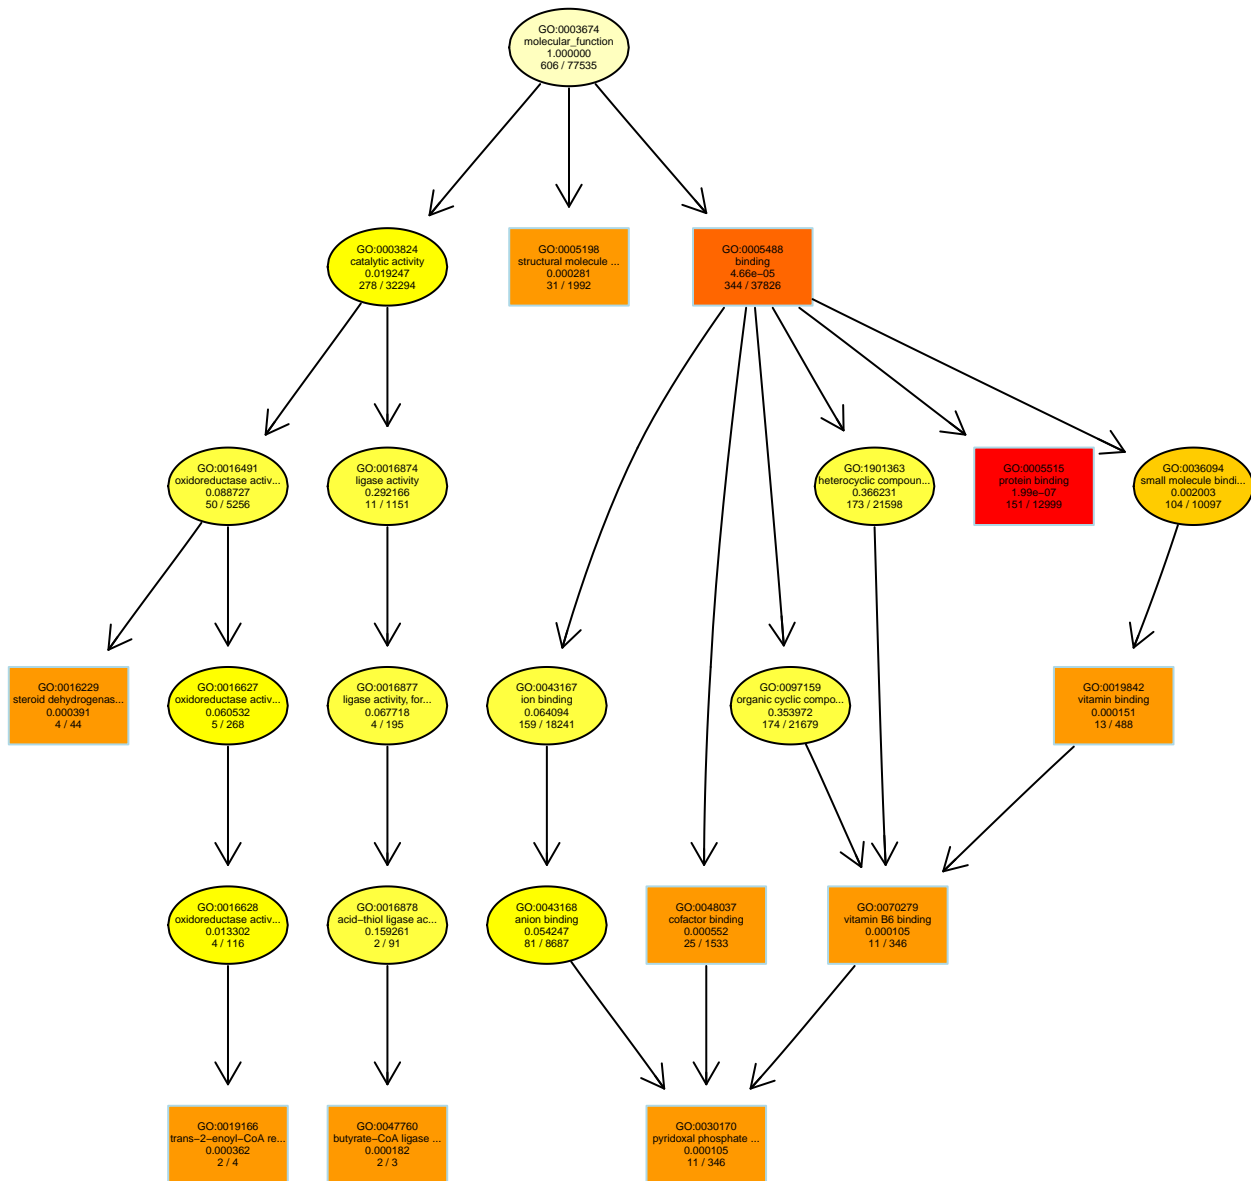

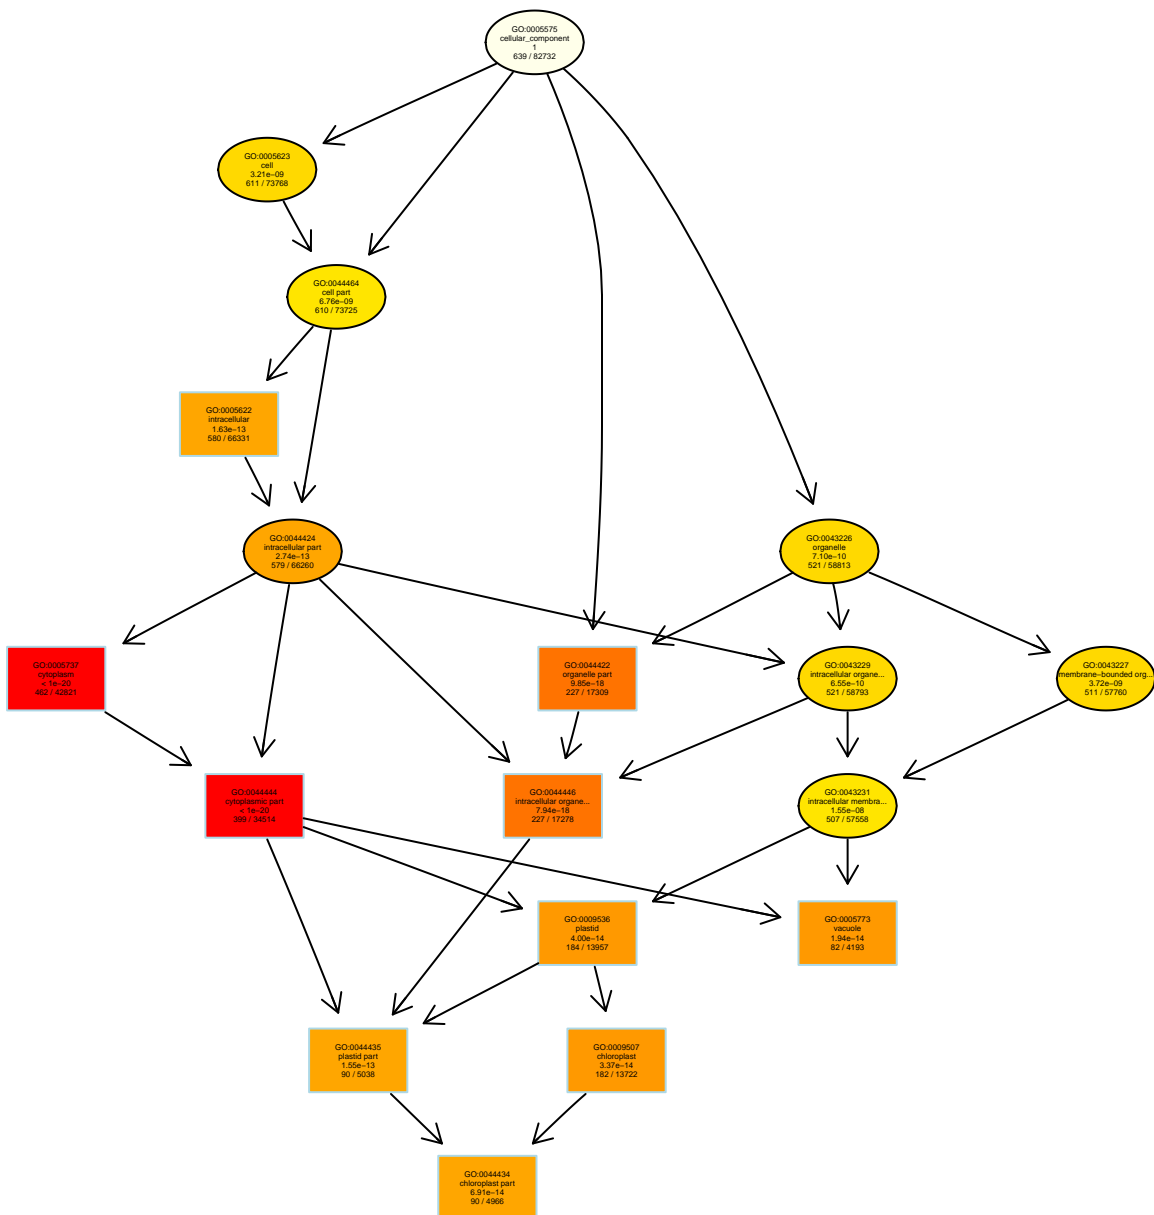

Supplement: s1 [file s1]

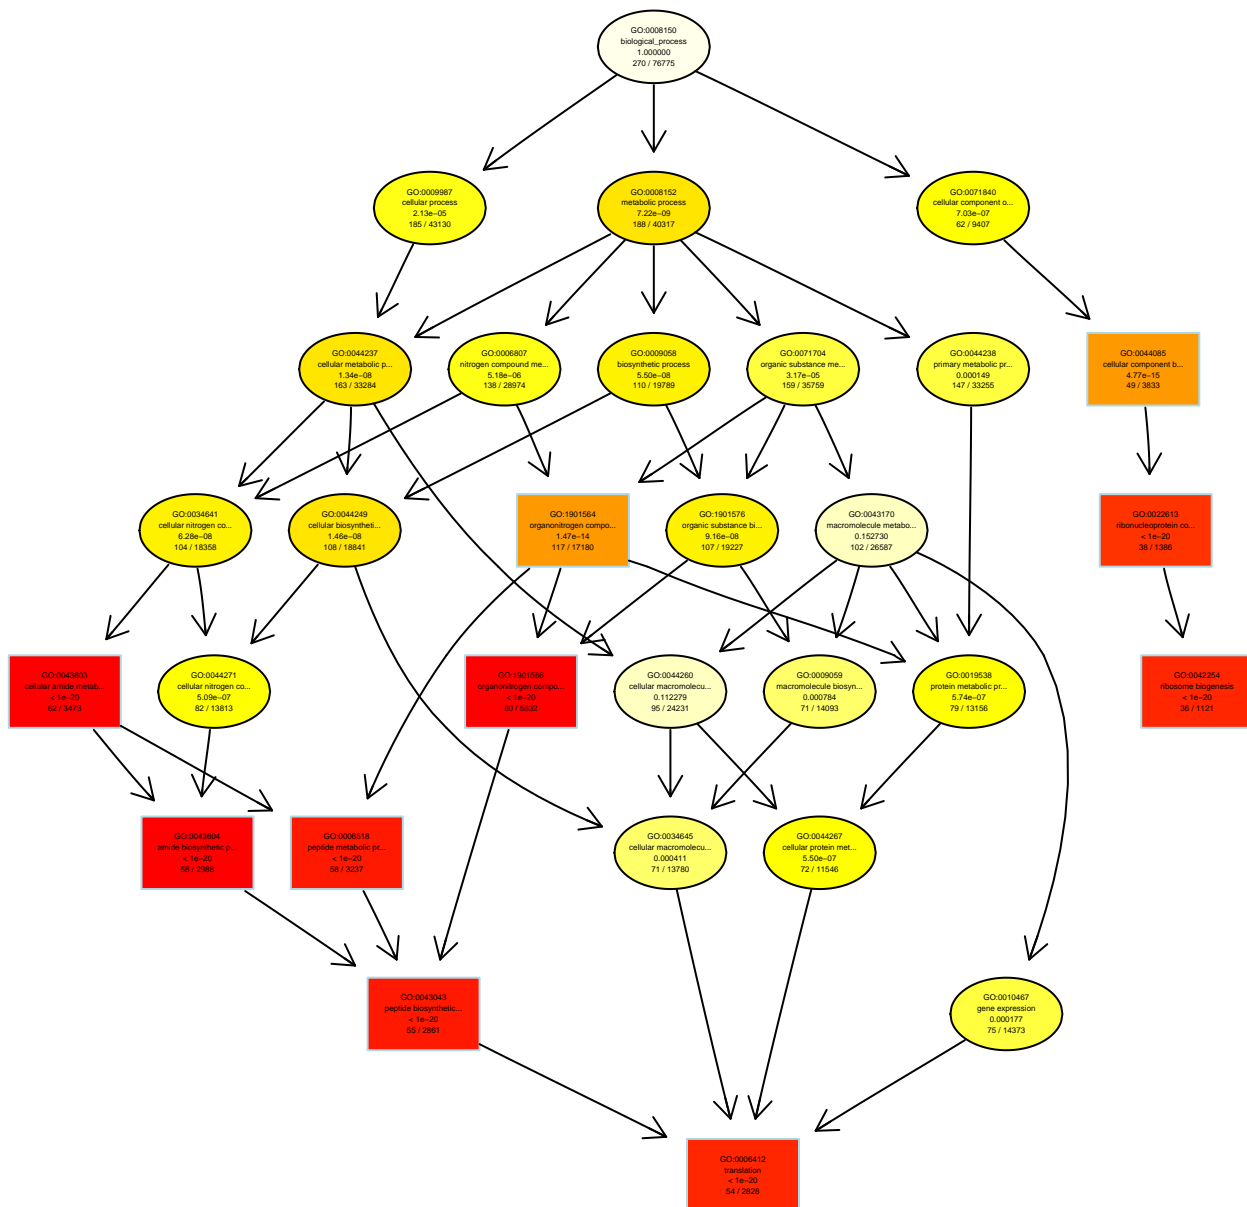

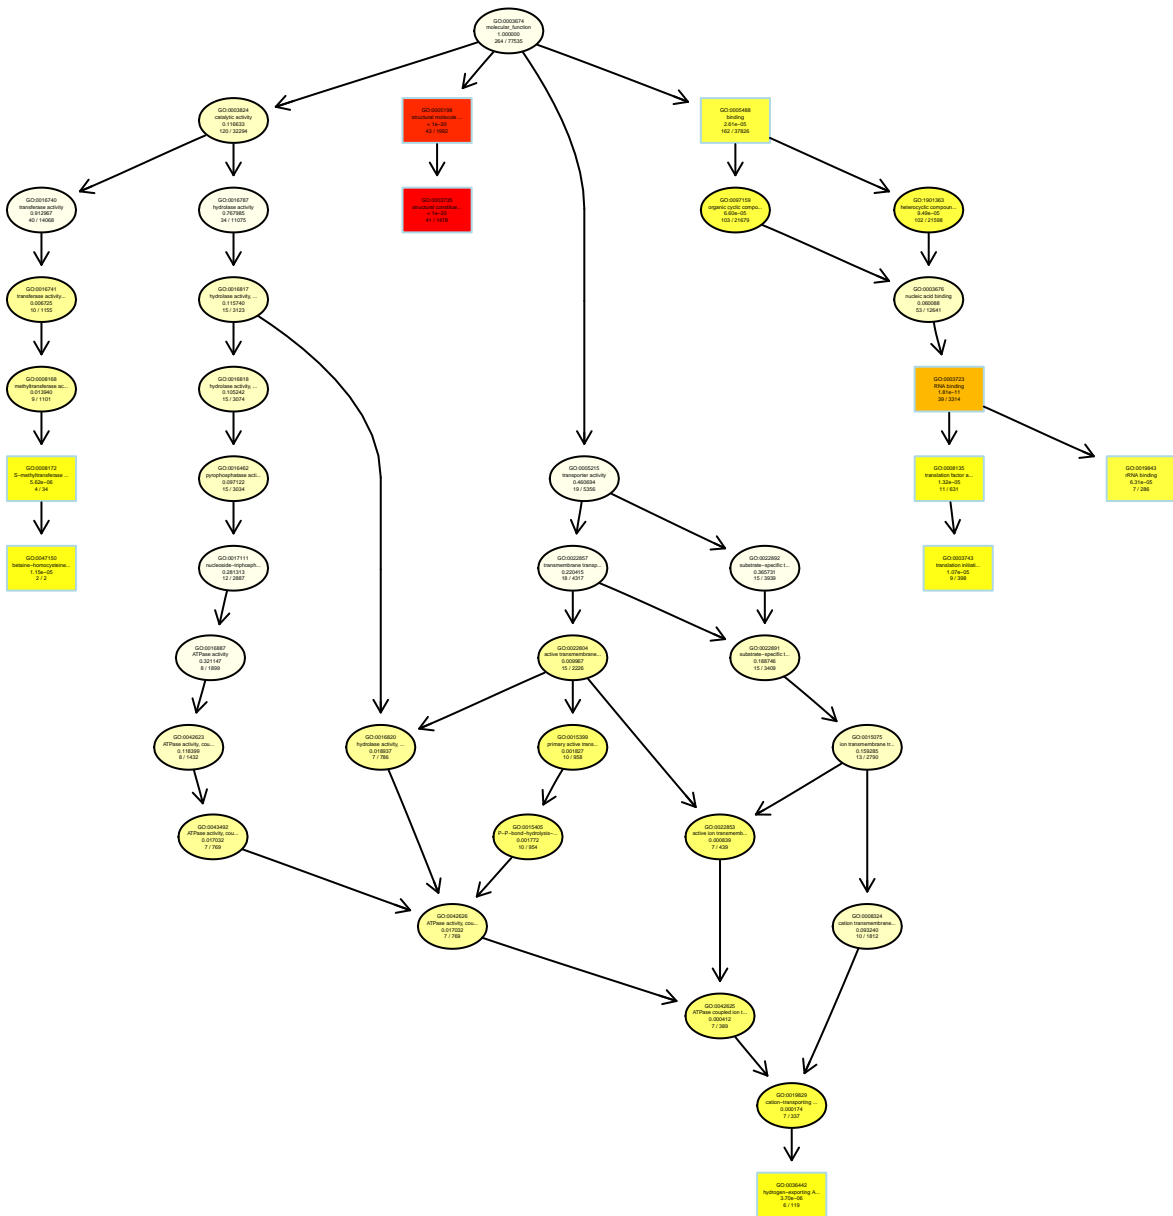

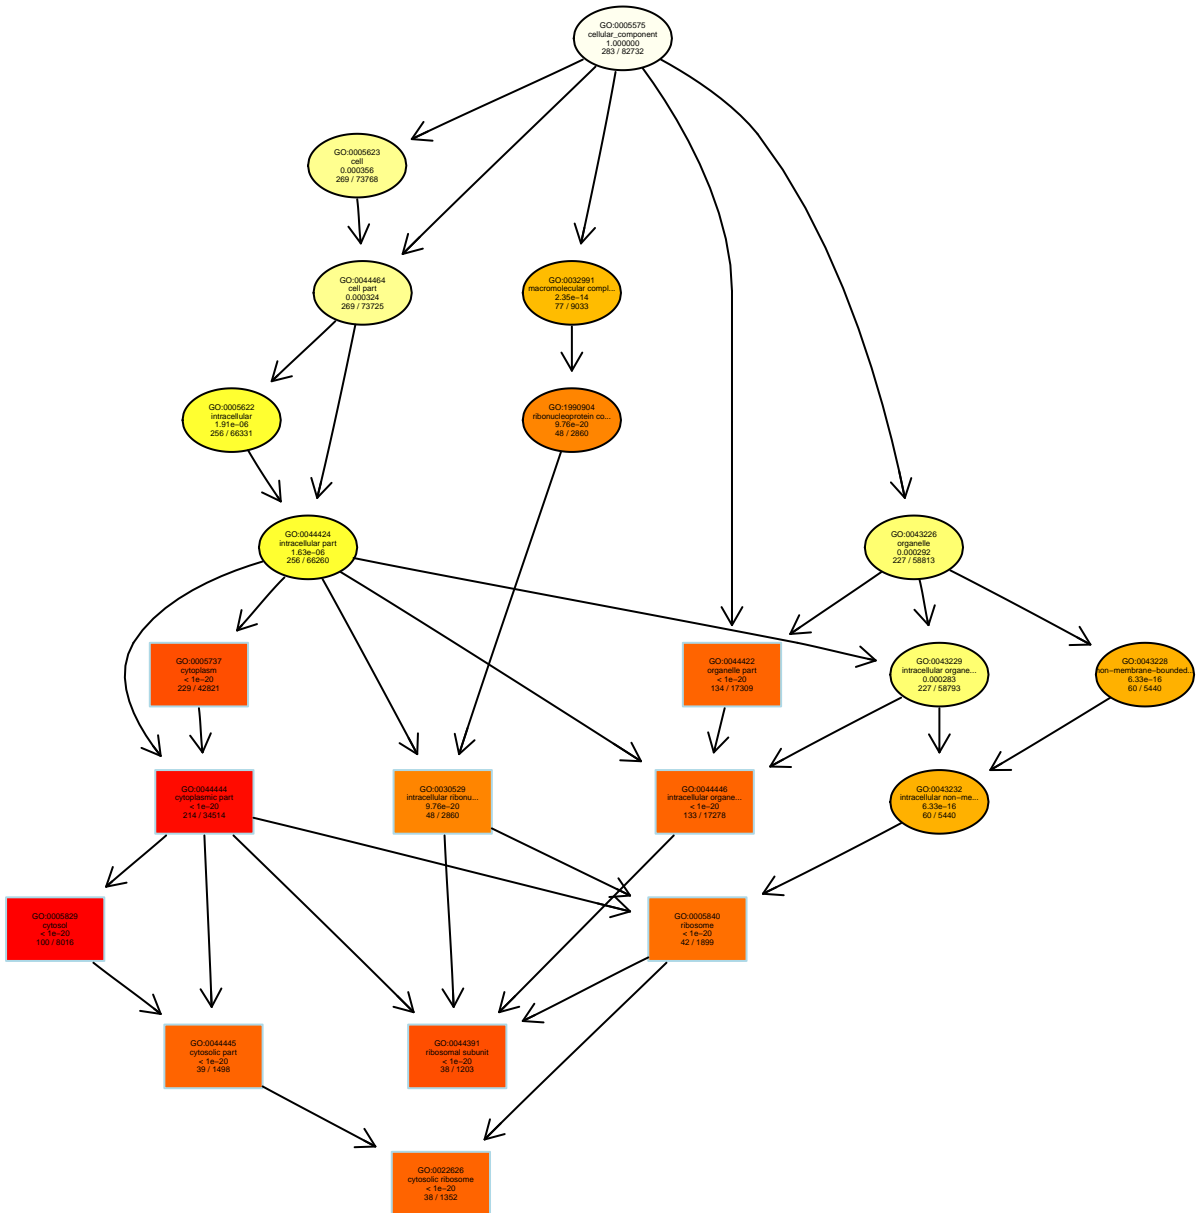

Supplement: s1 [file s1]

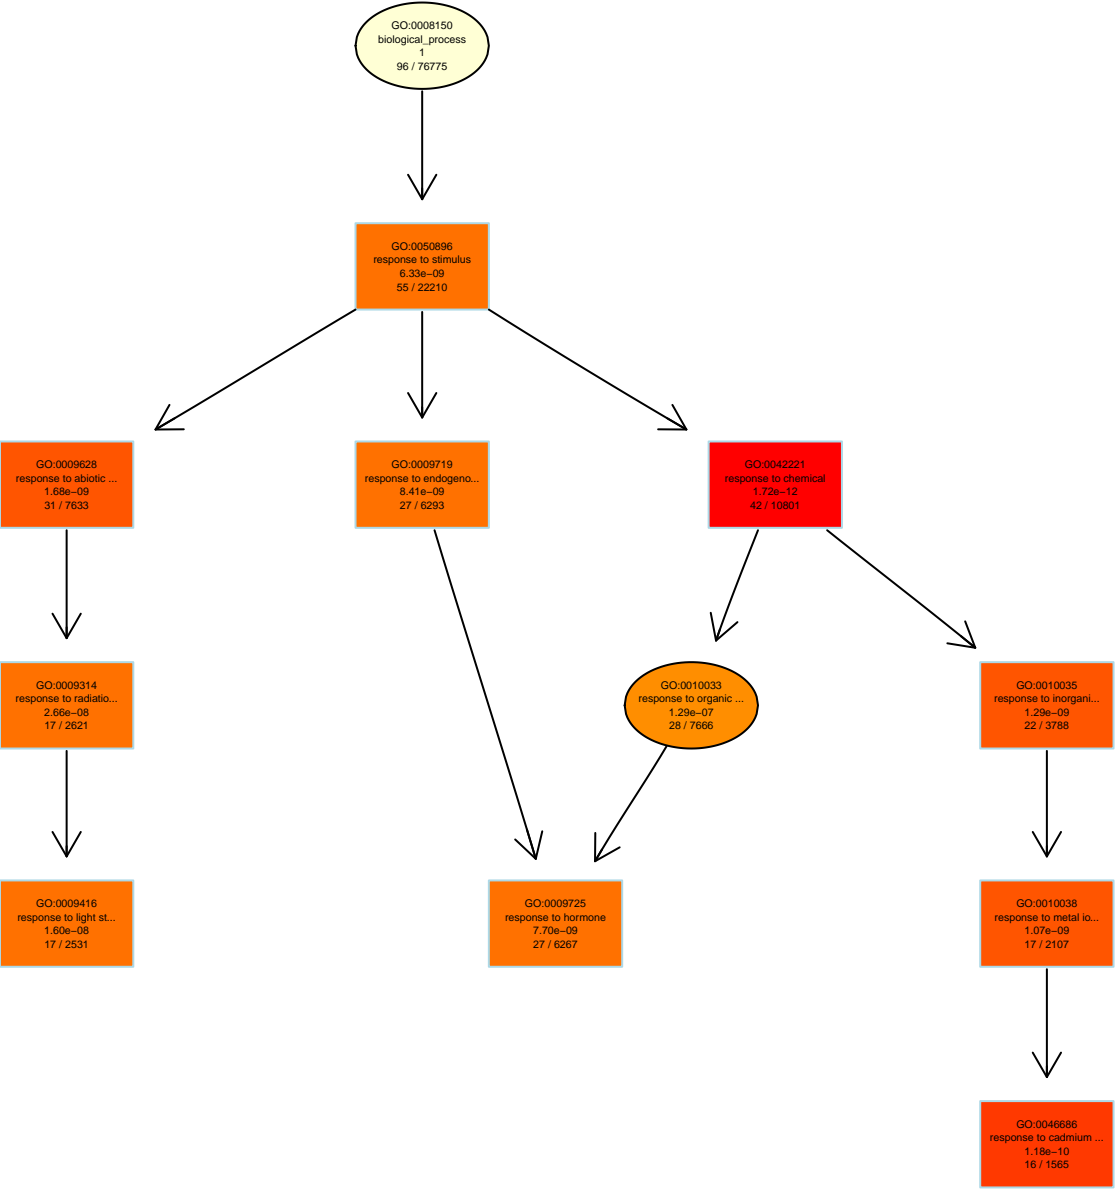

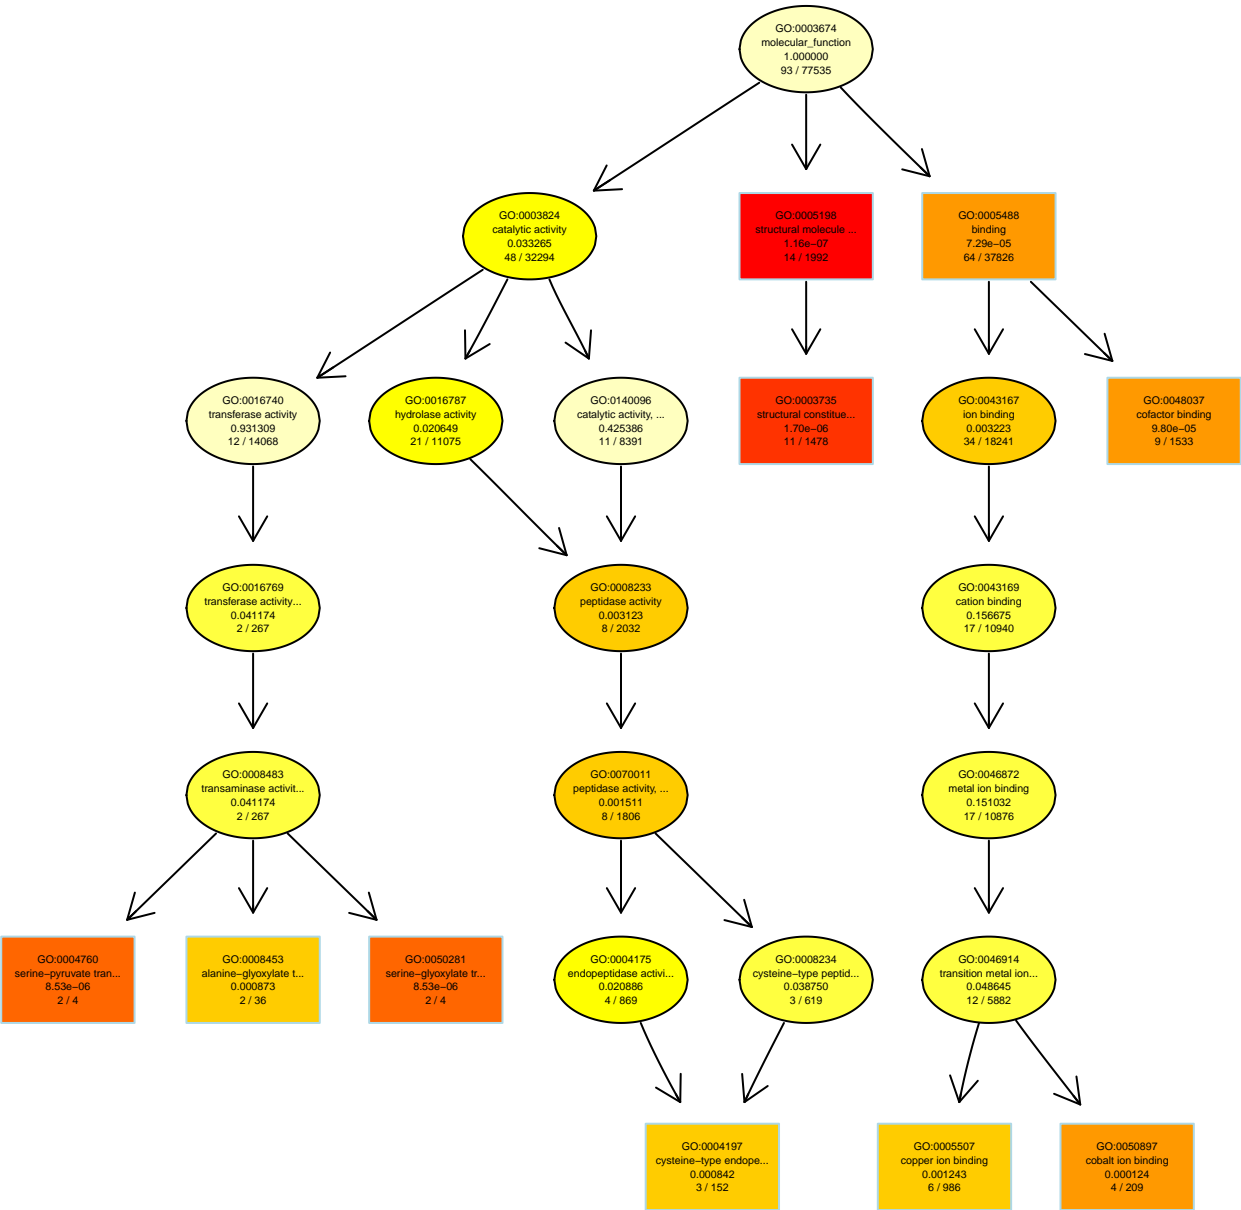

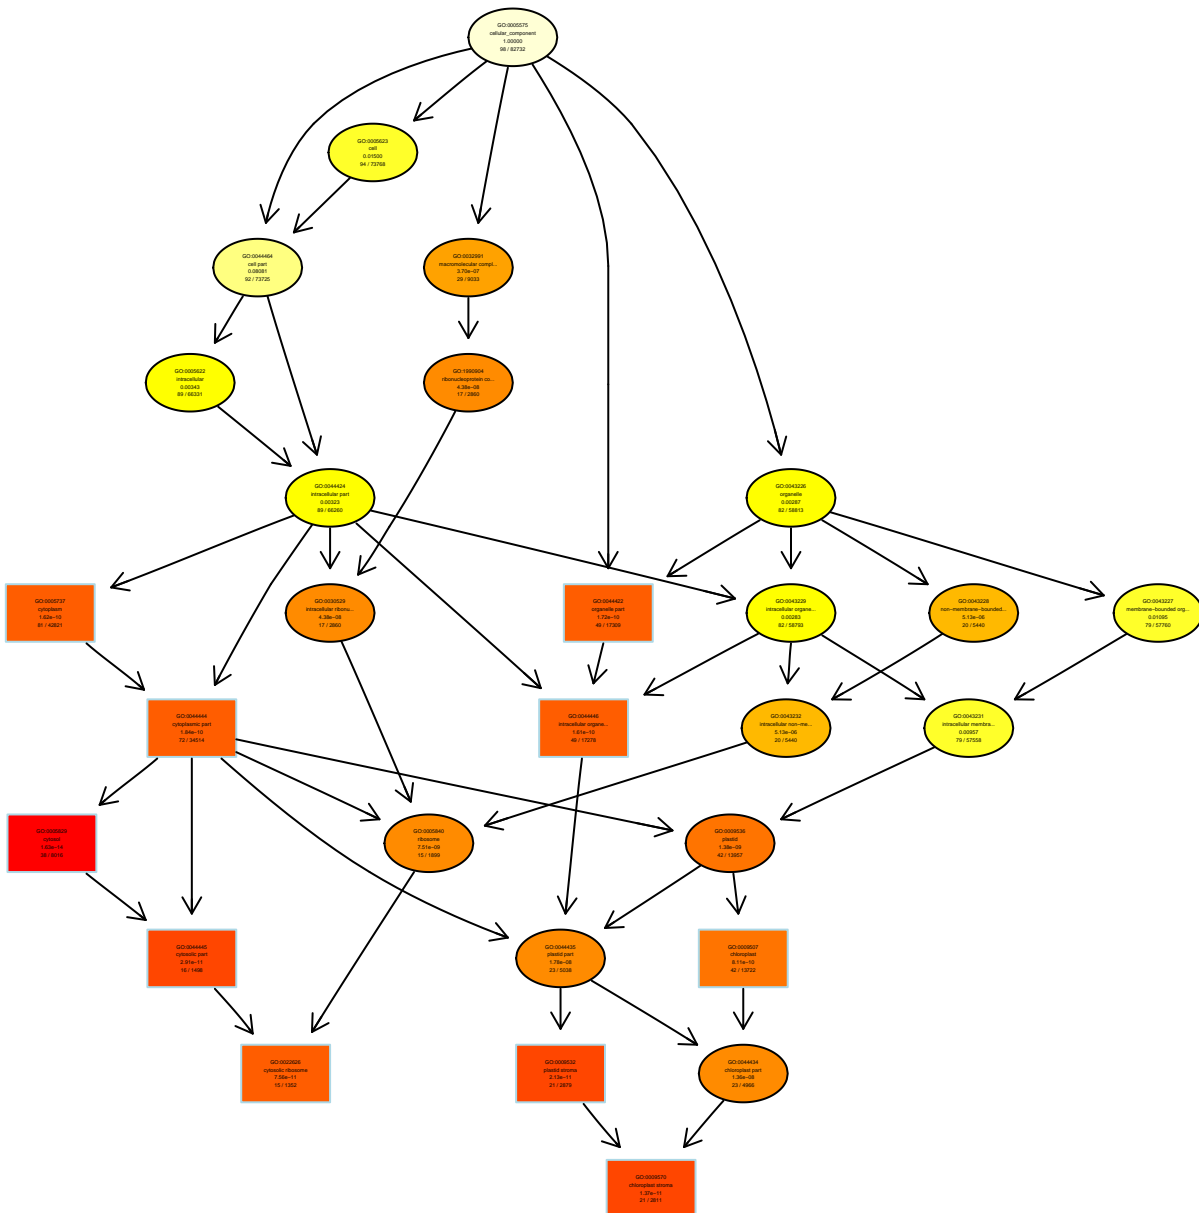

Supplement: s1 [file s1]

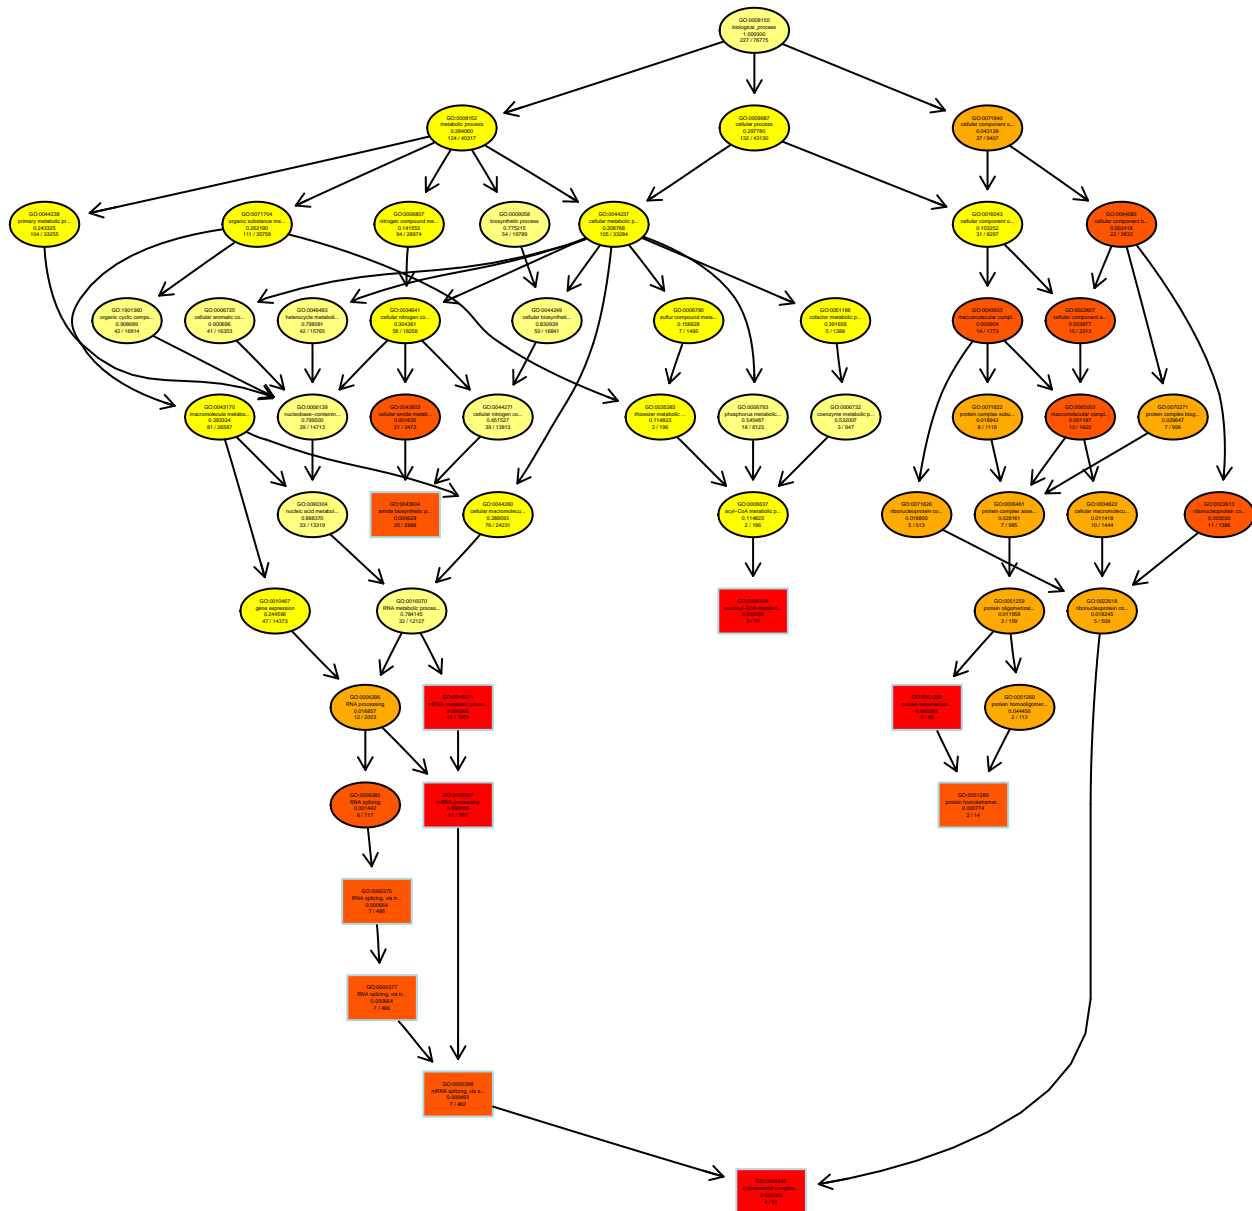

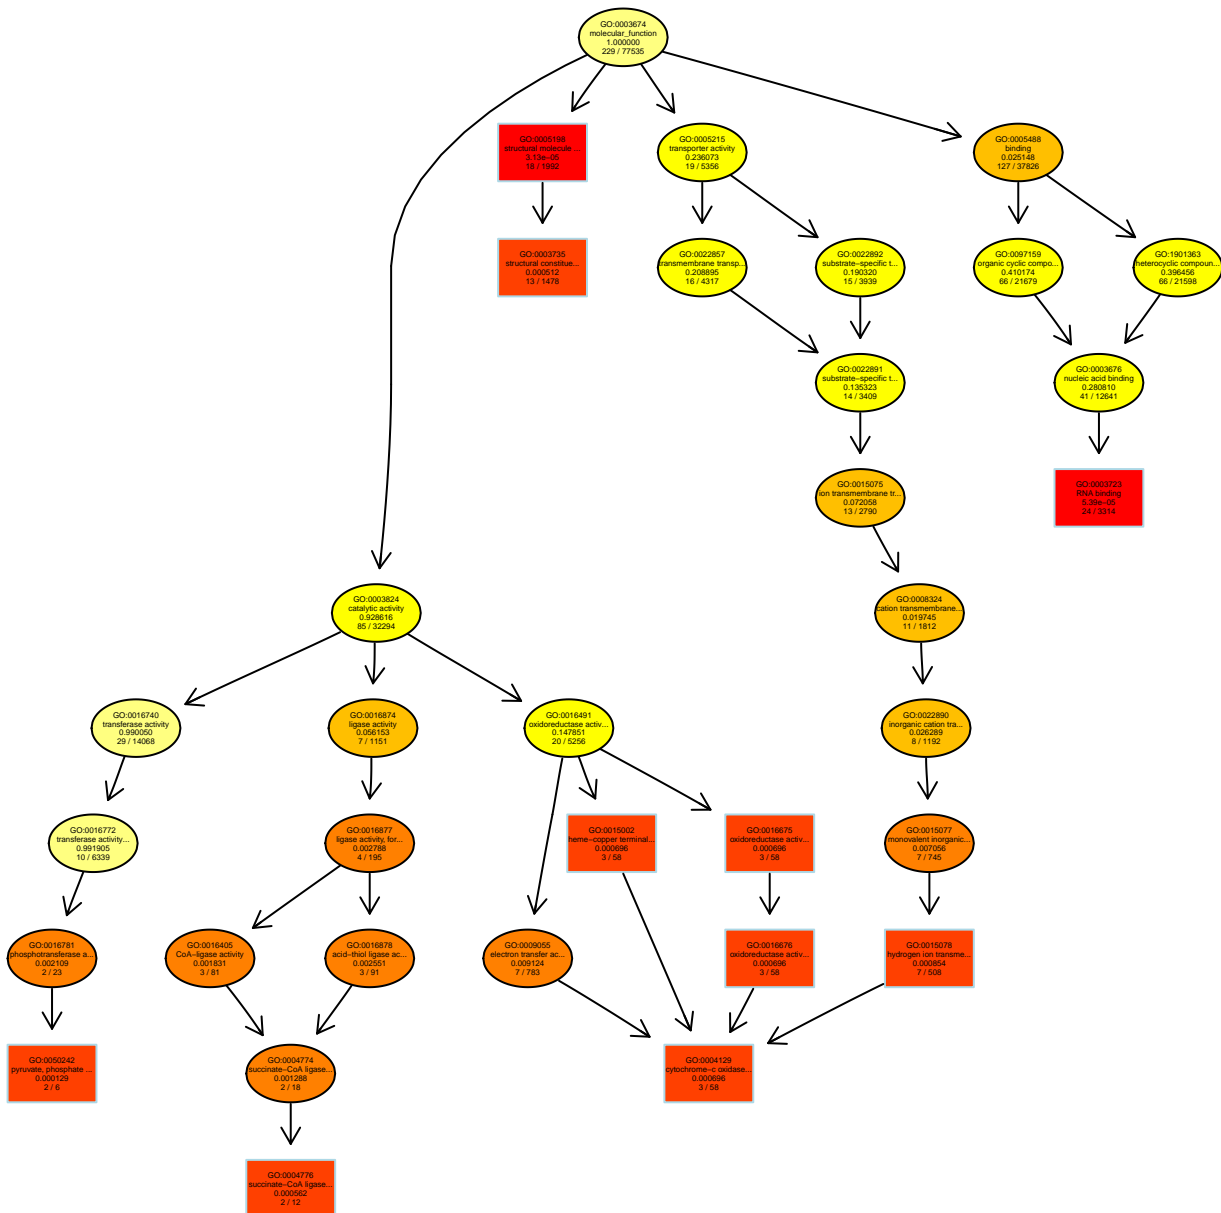

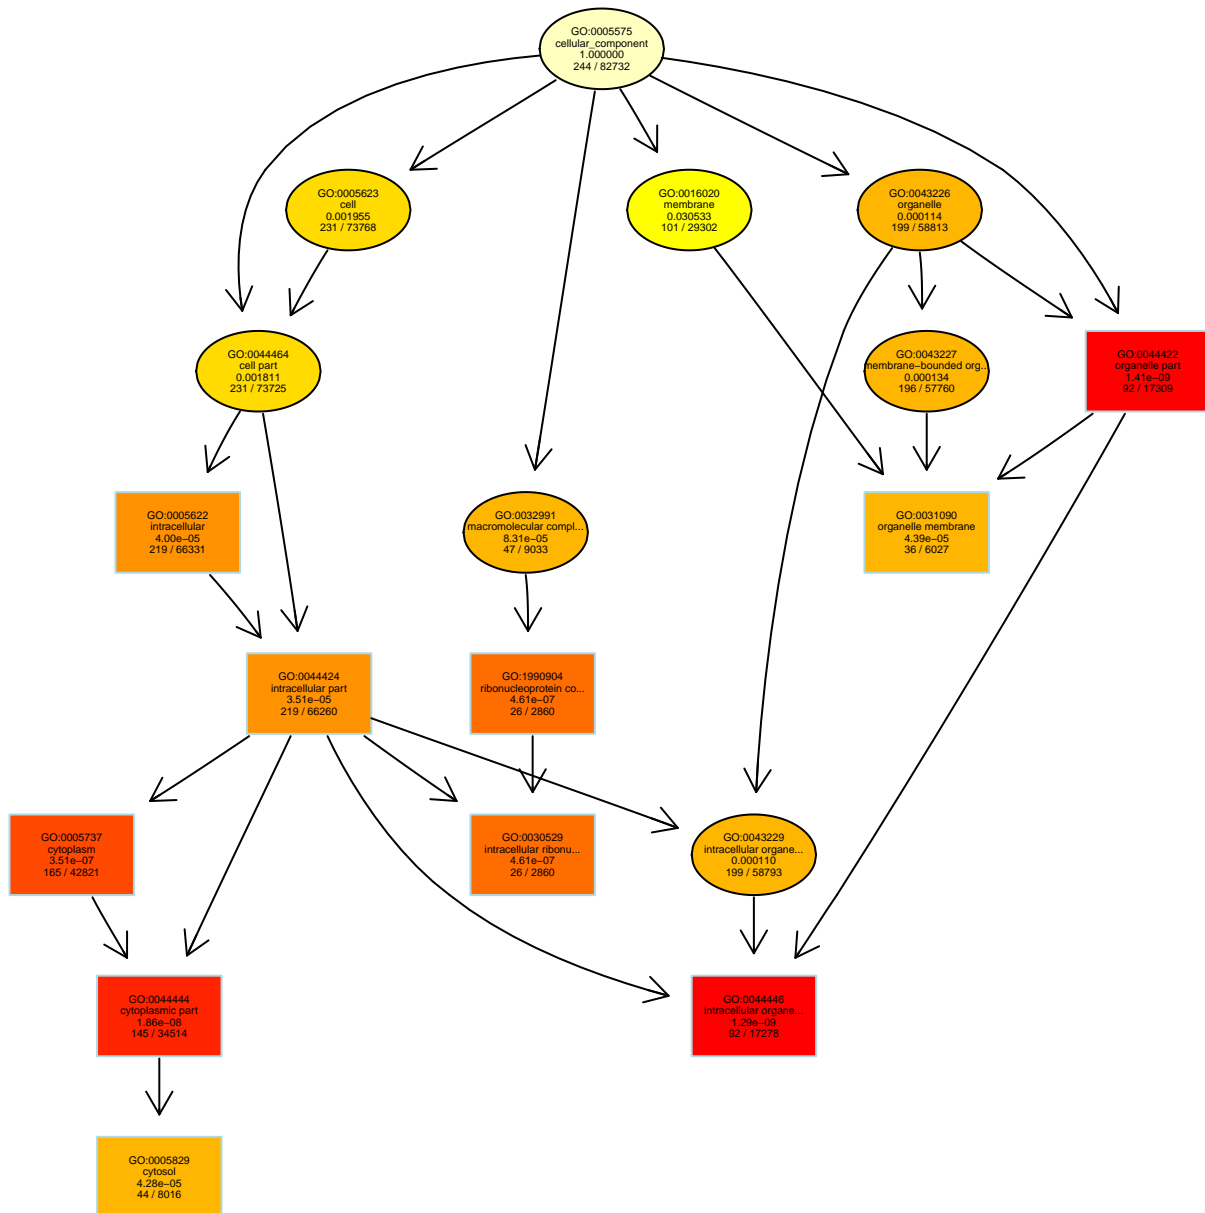

Supplement: s1 [file s1]

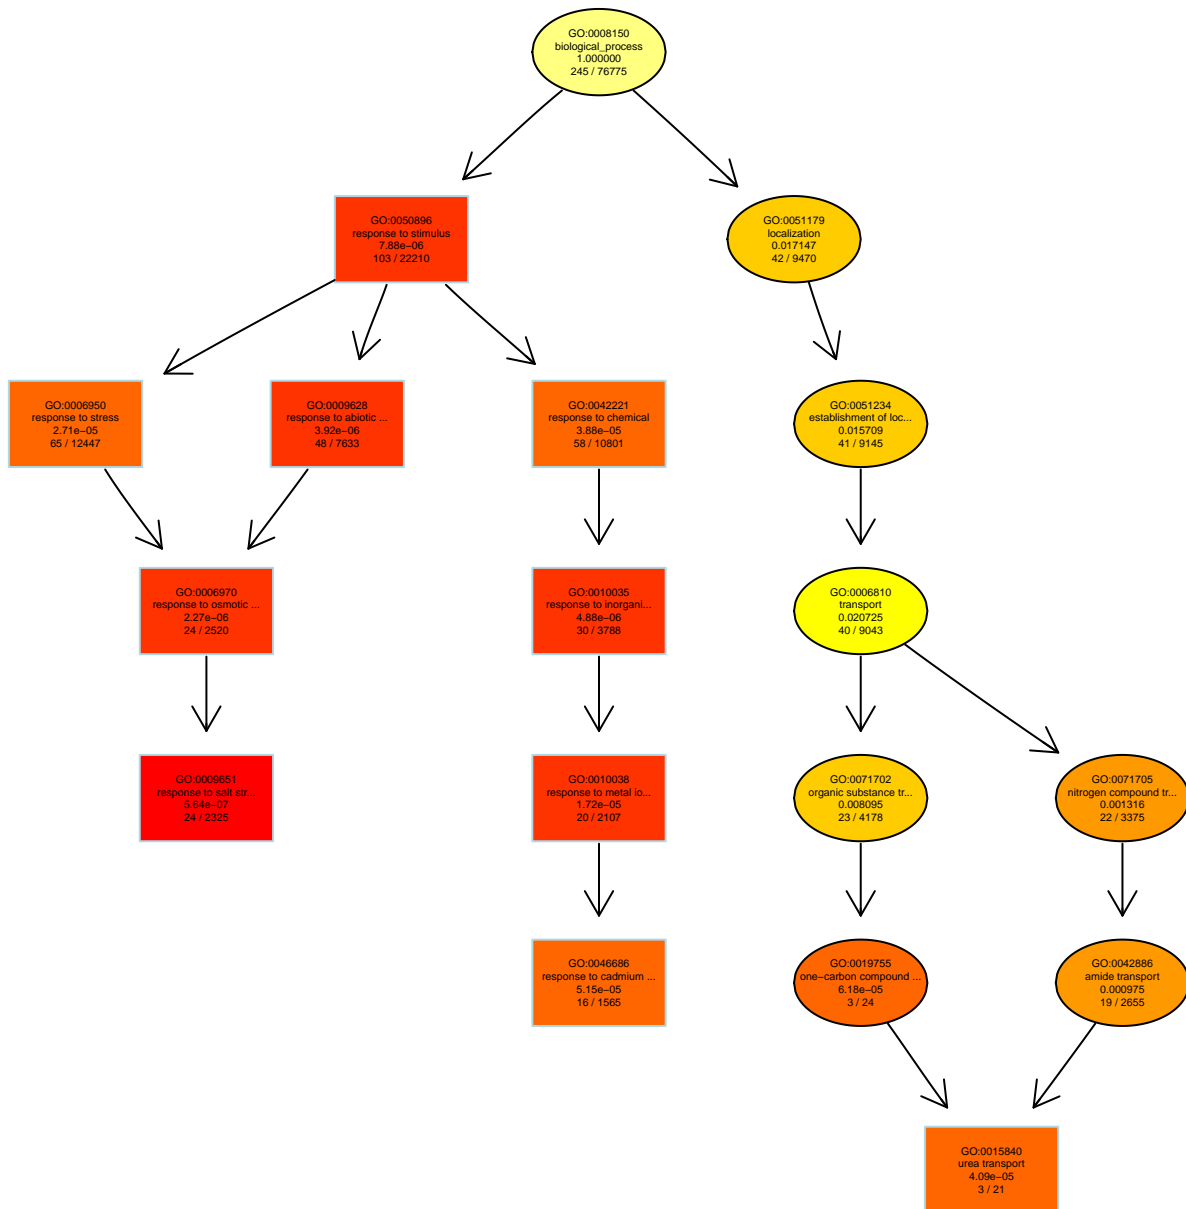

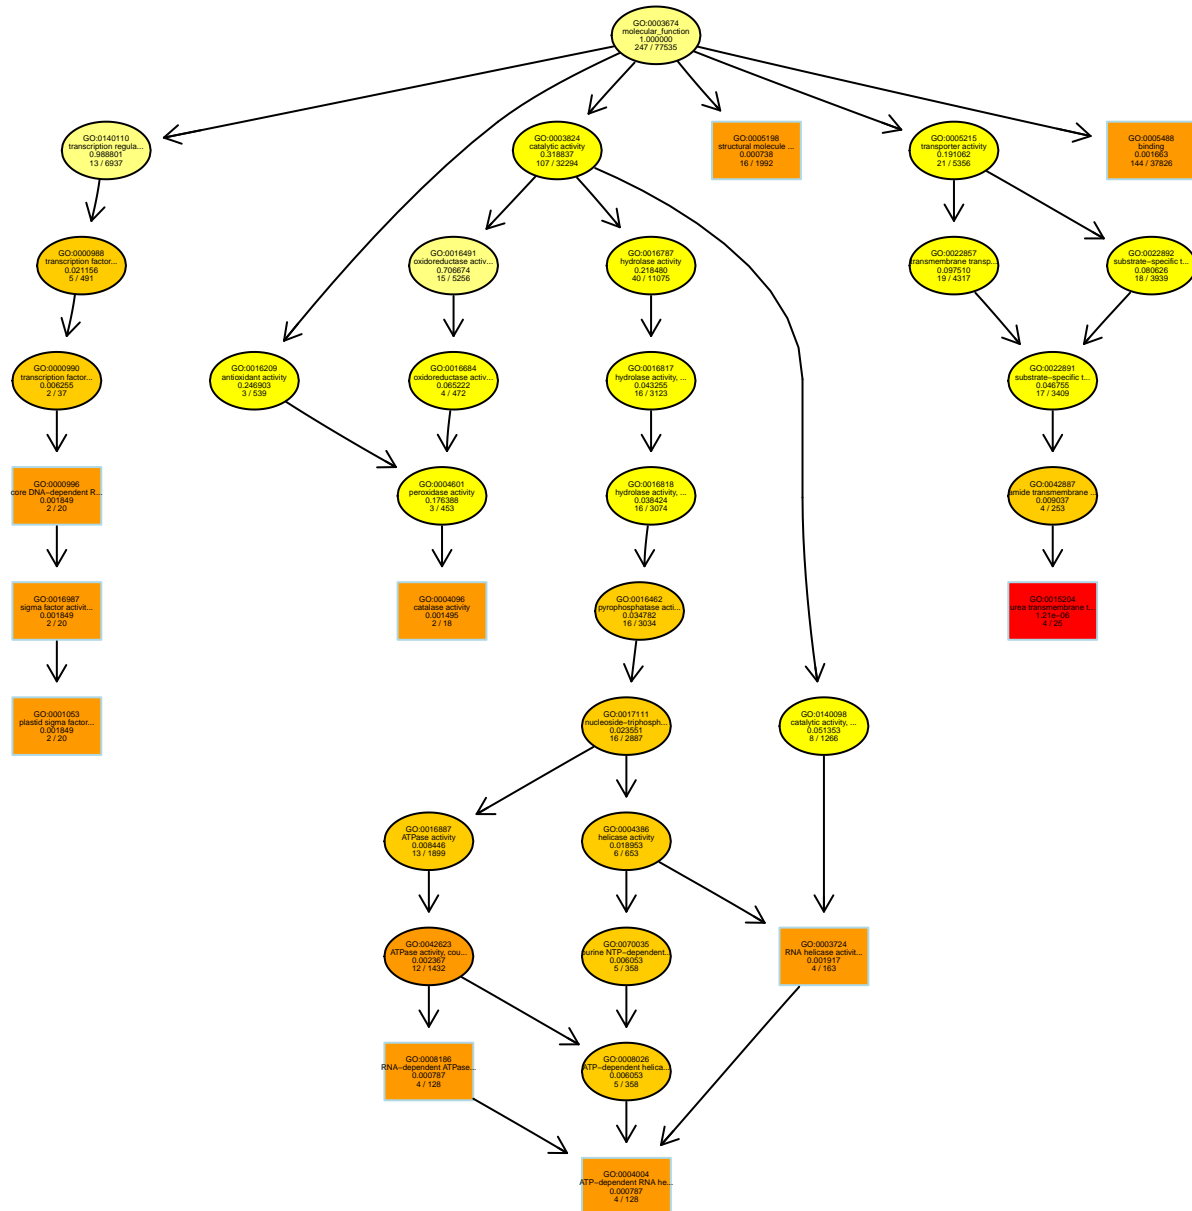

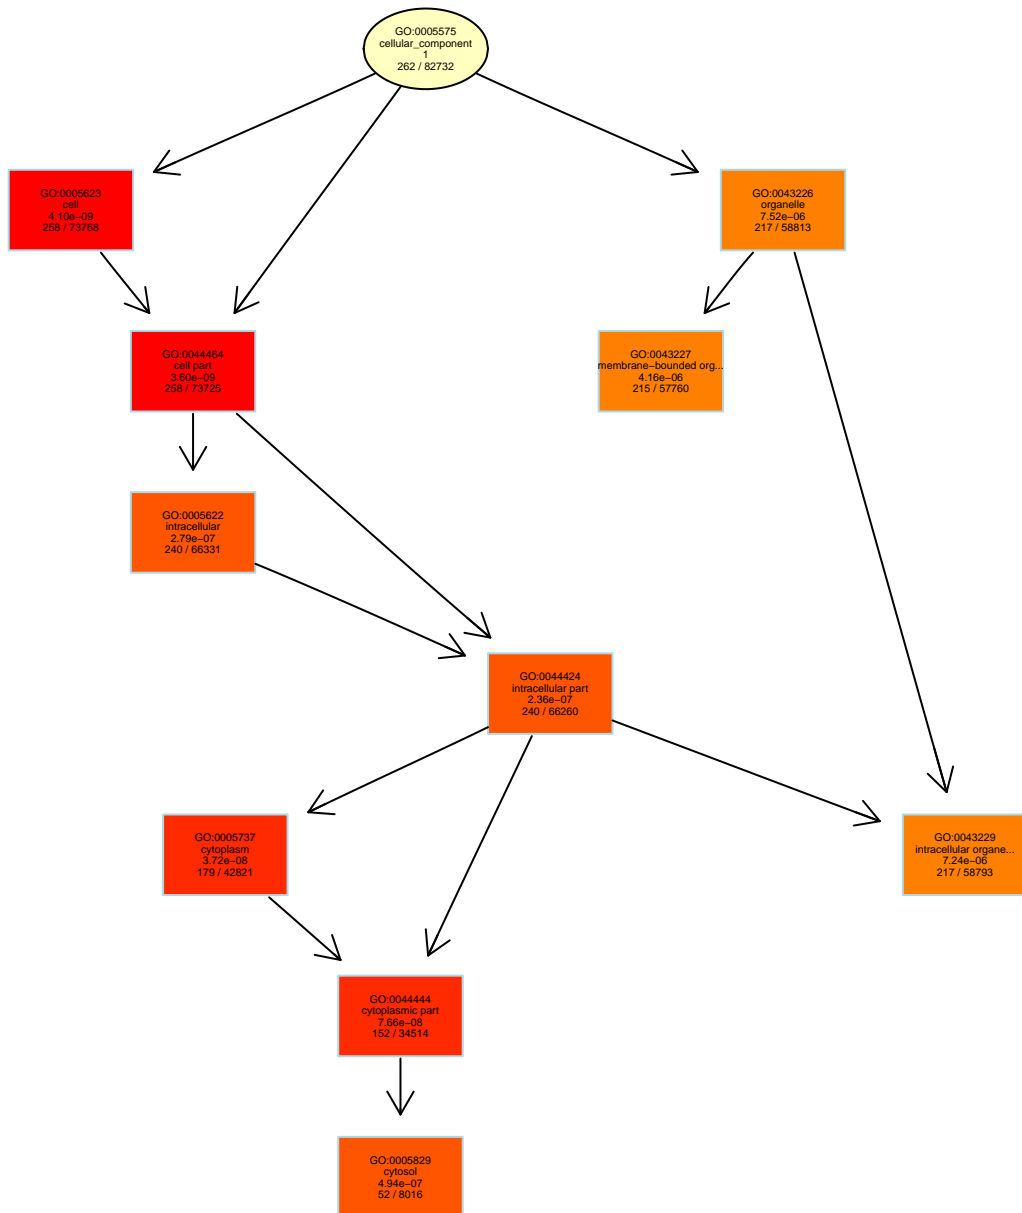

Supplement: s1 [file s1]

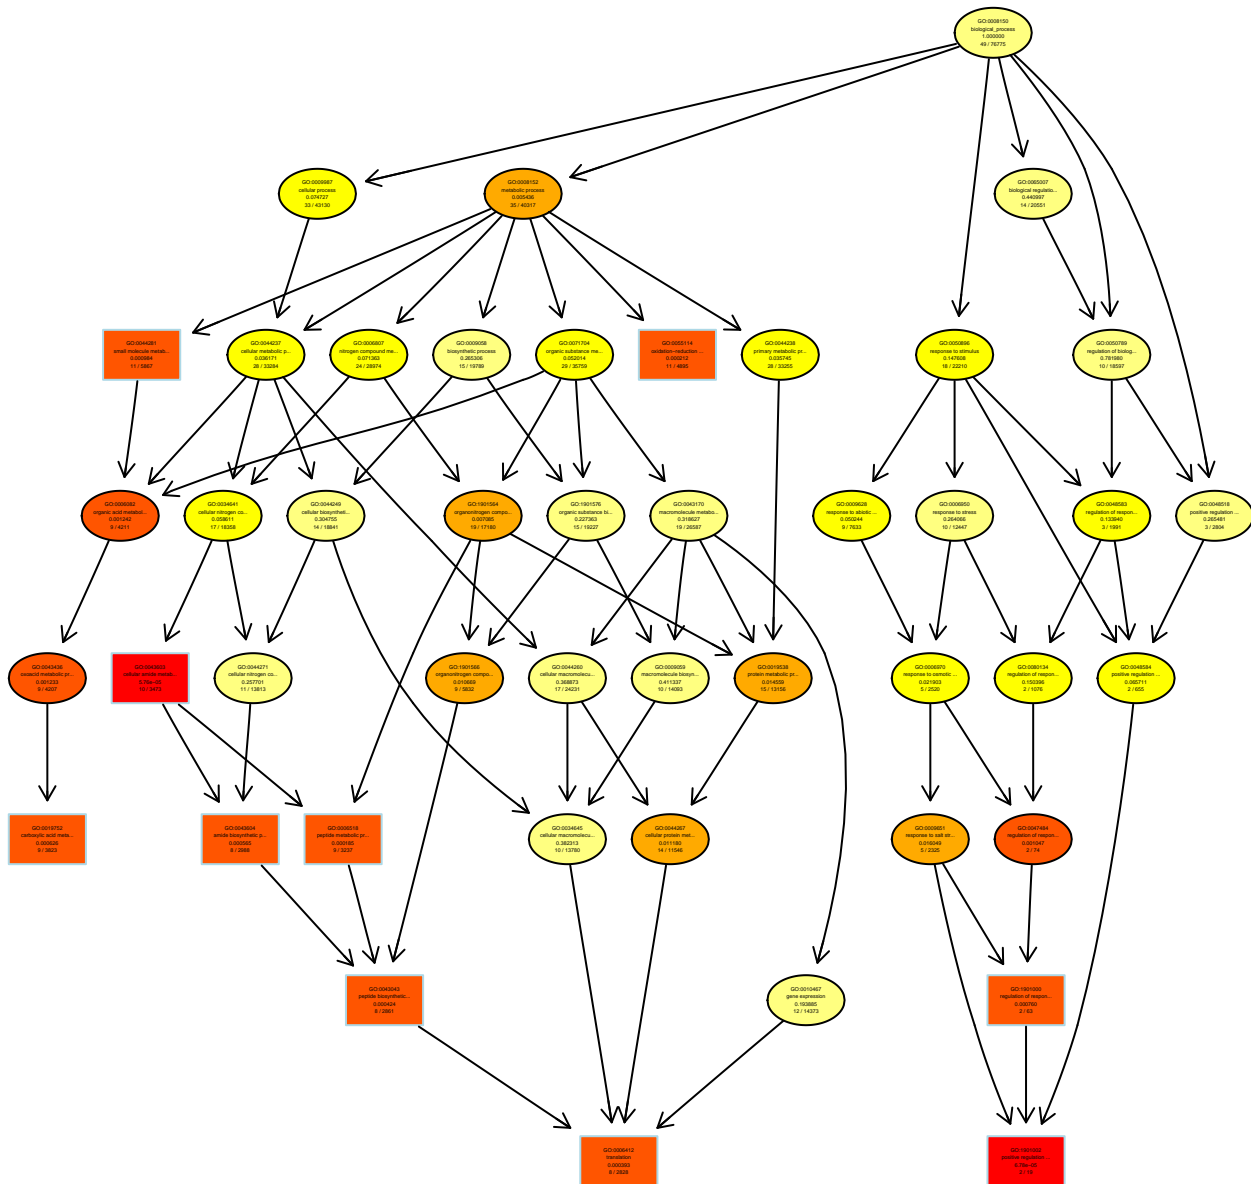

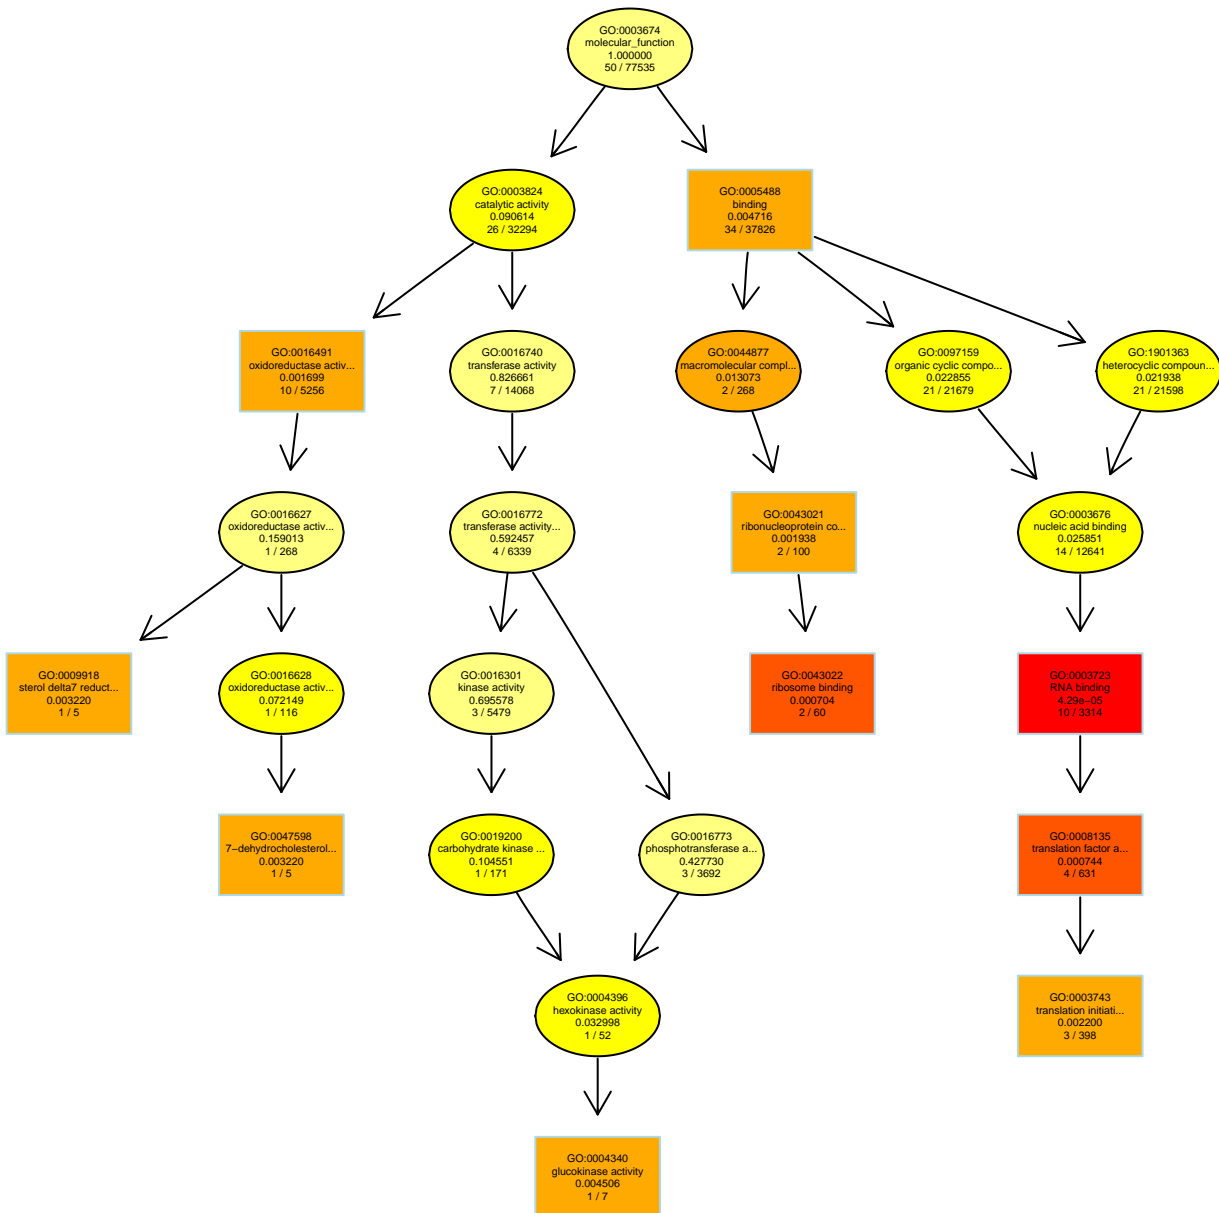

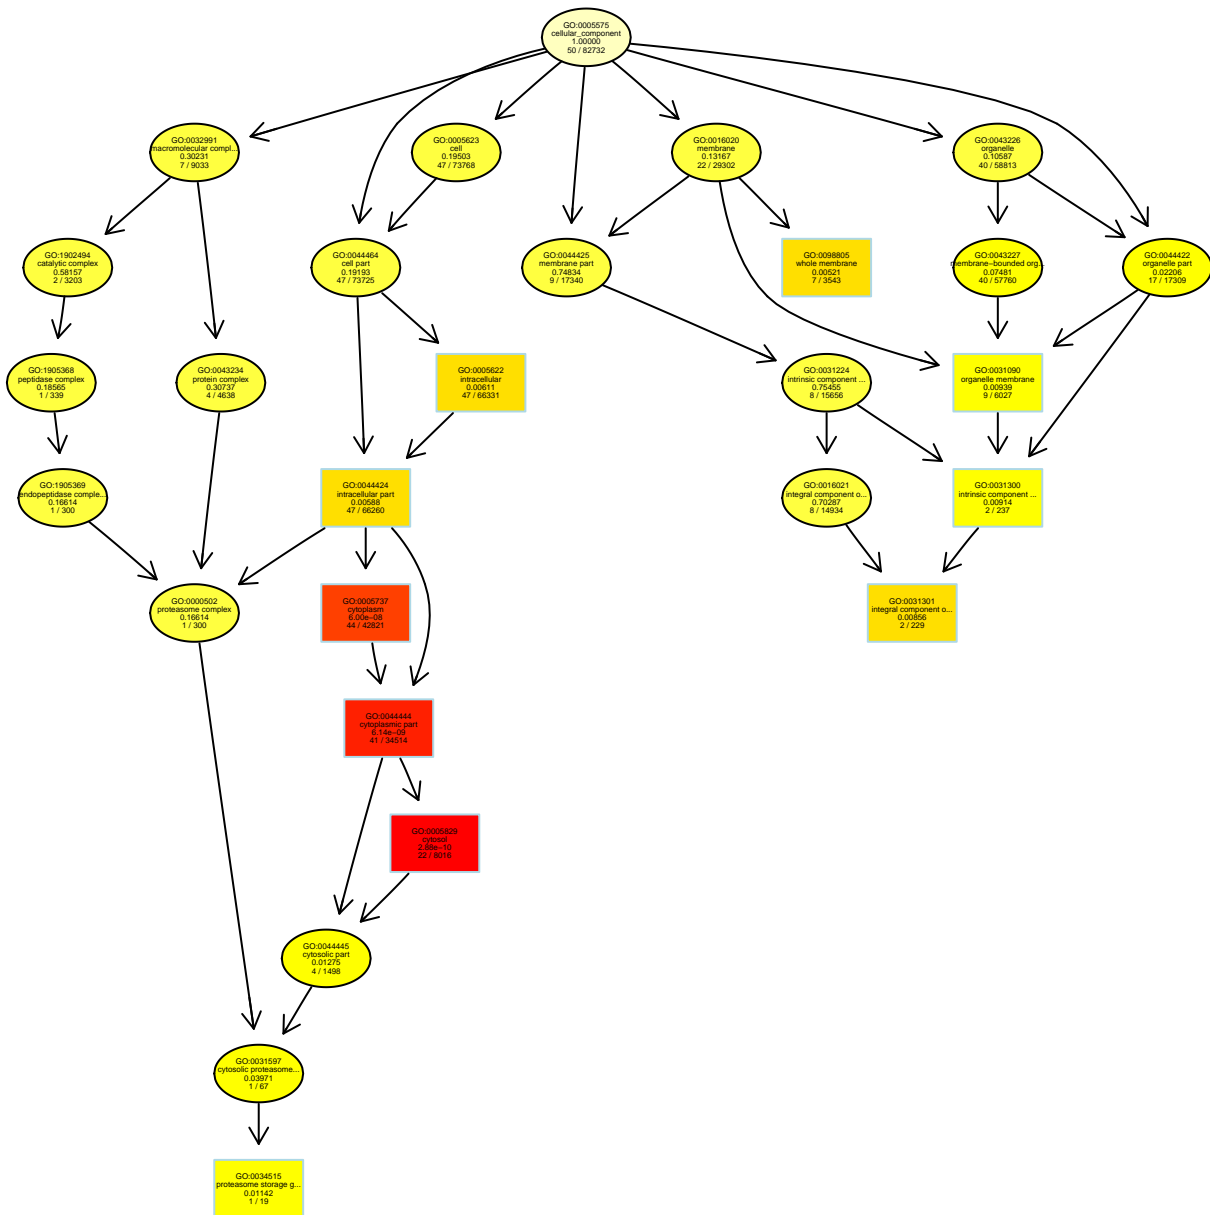

Supplement: s1 [file s1]

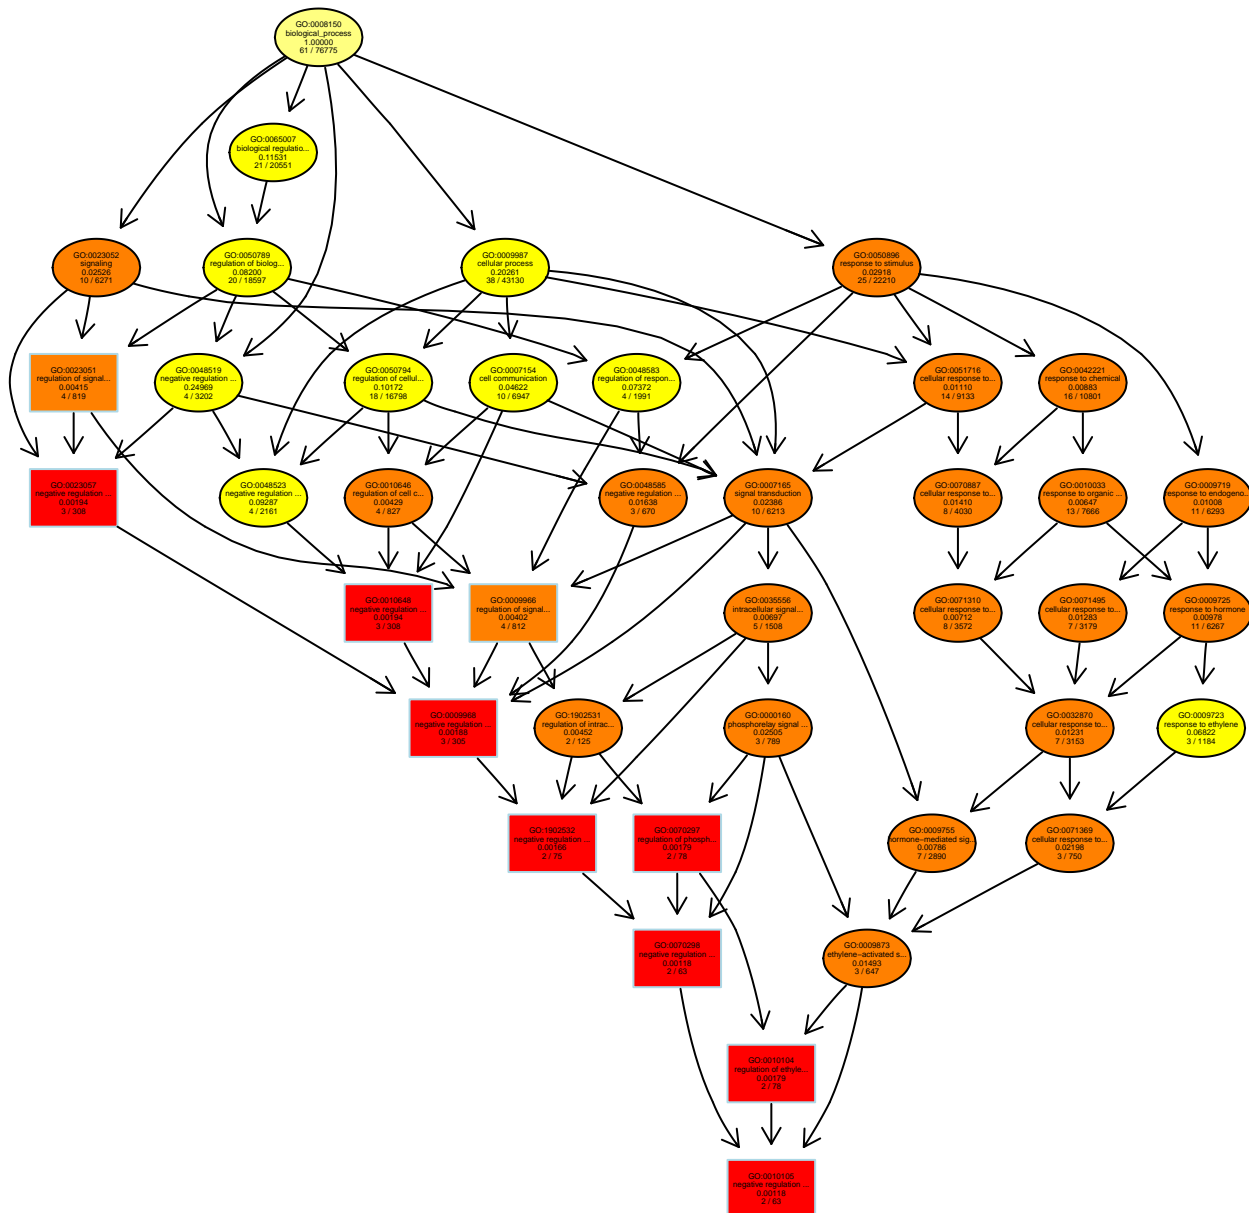

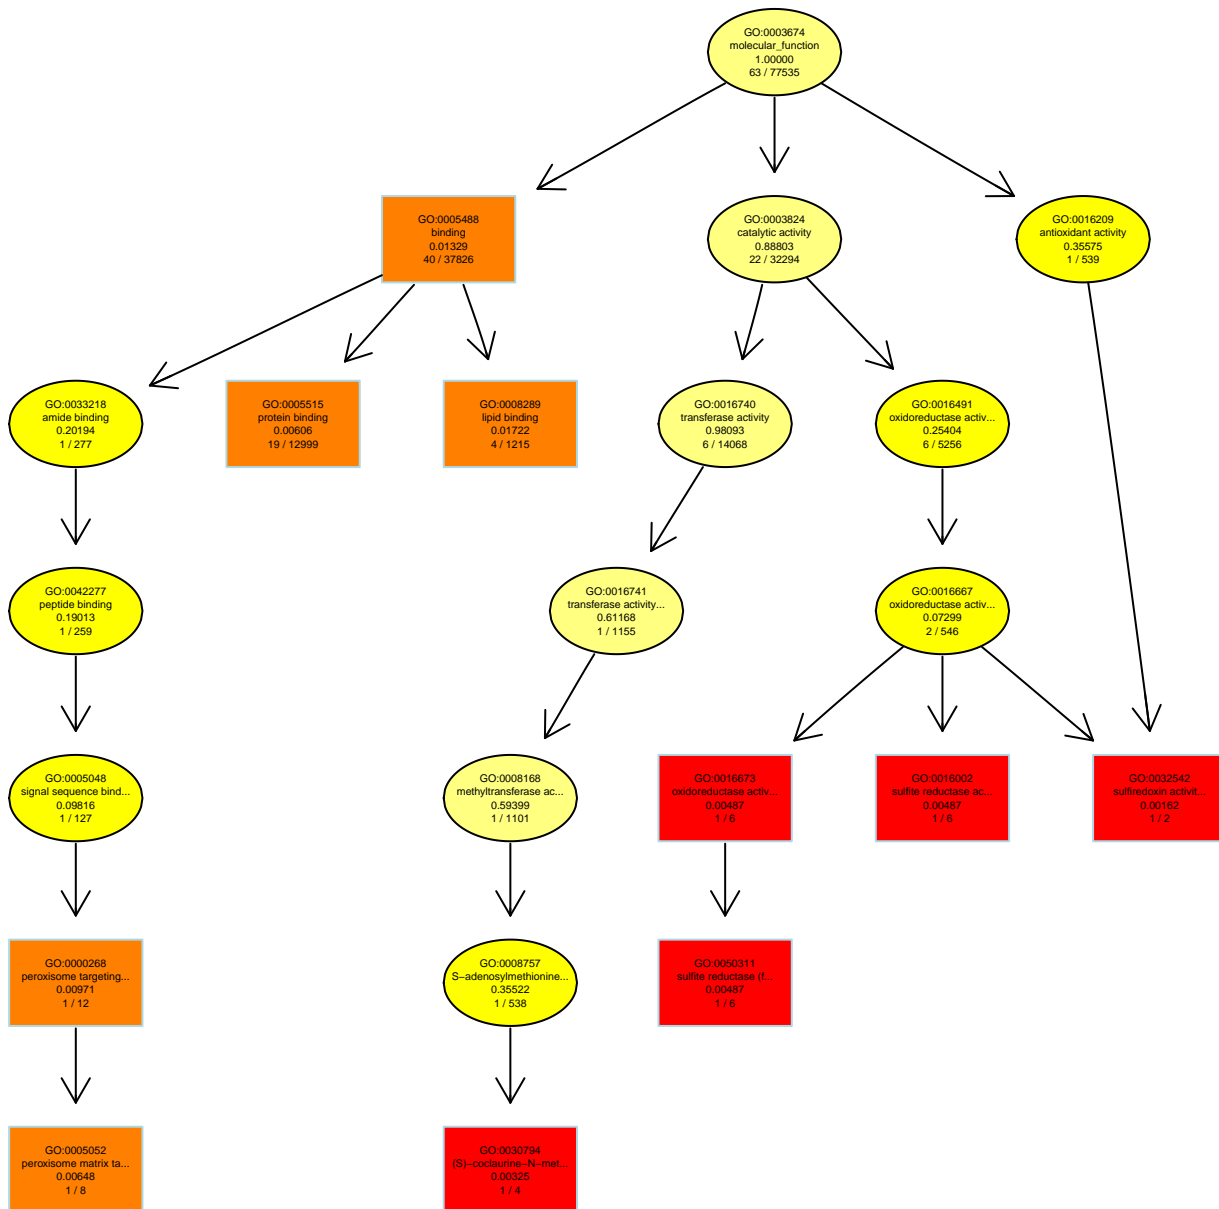

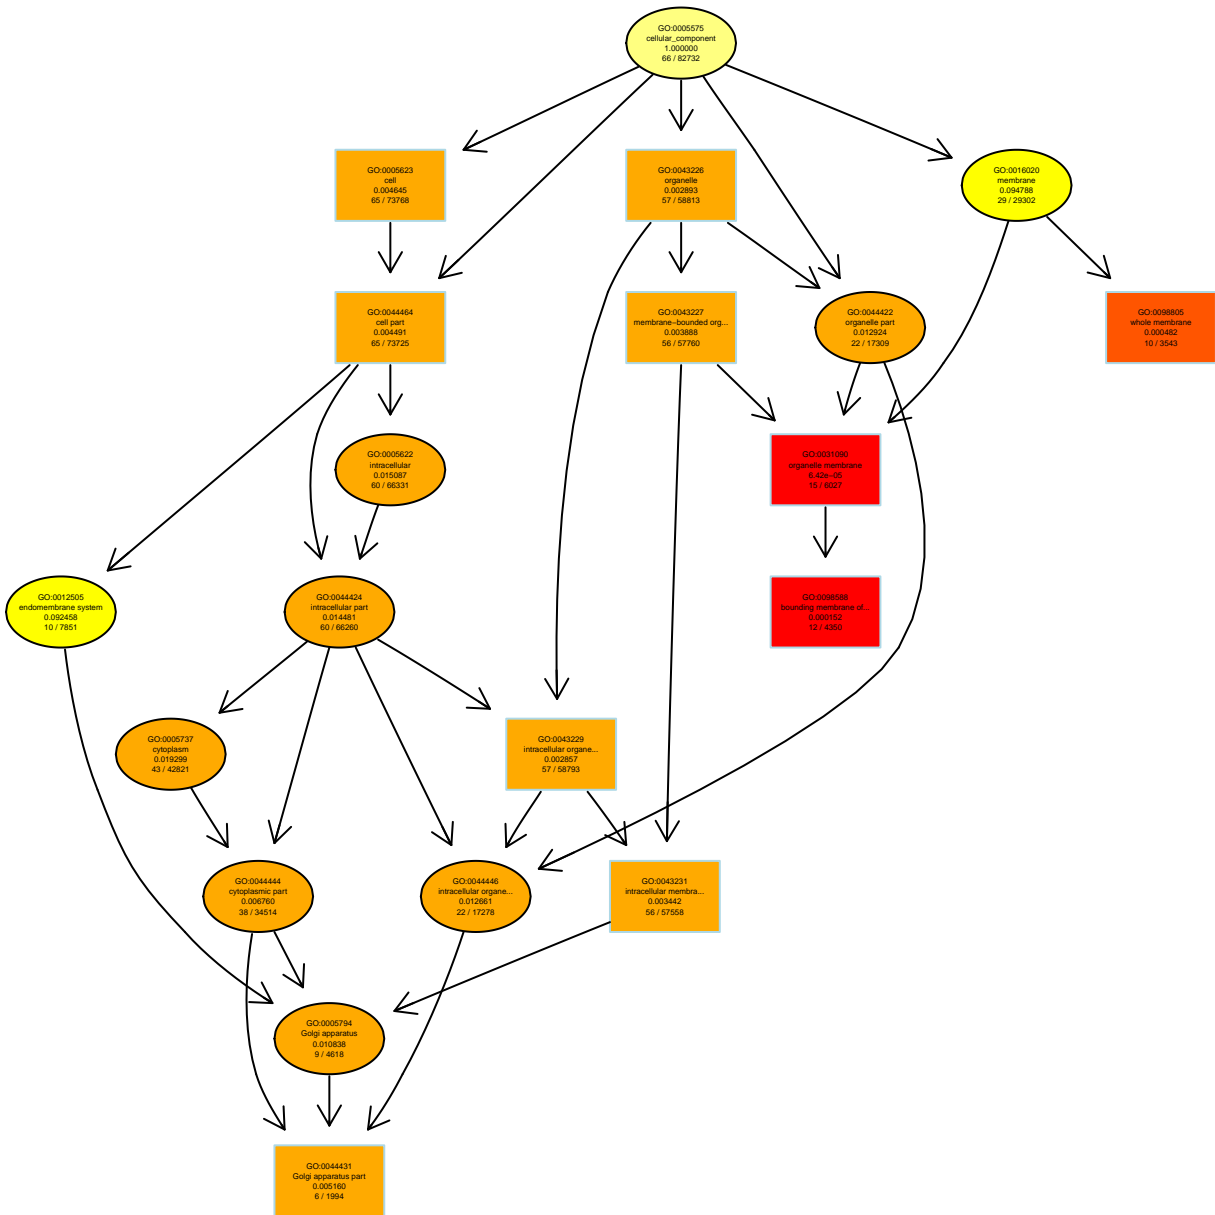

Supplement: s1 [file s1]

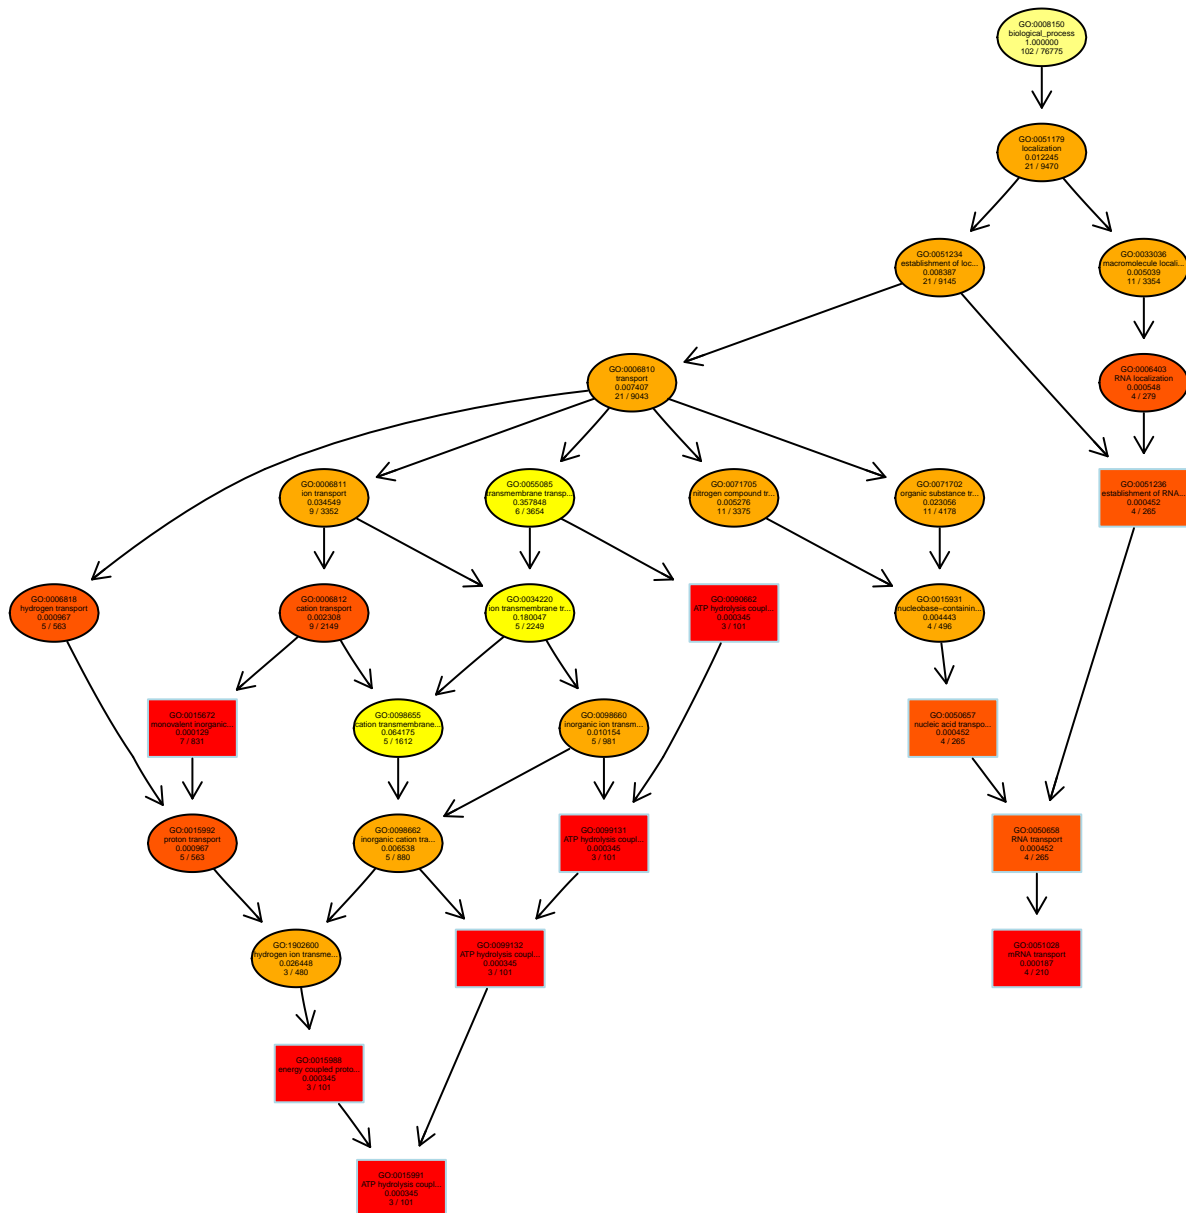

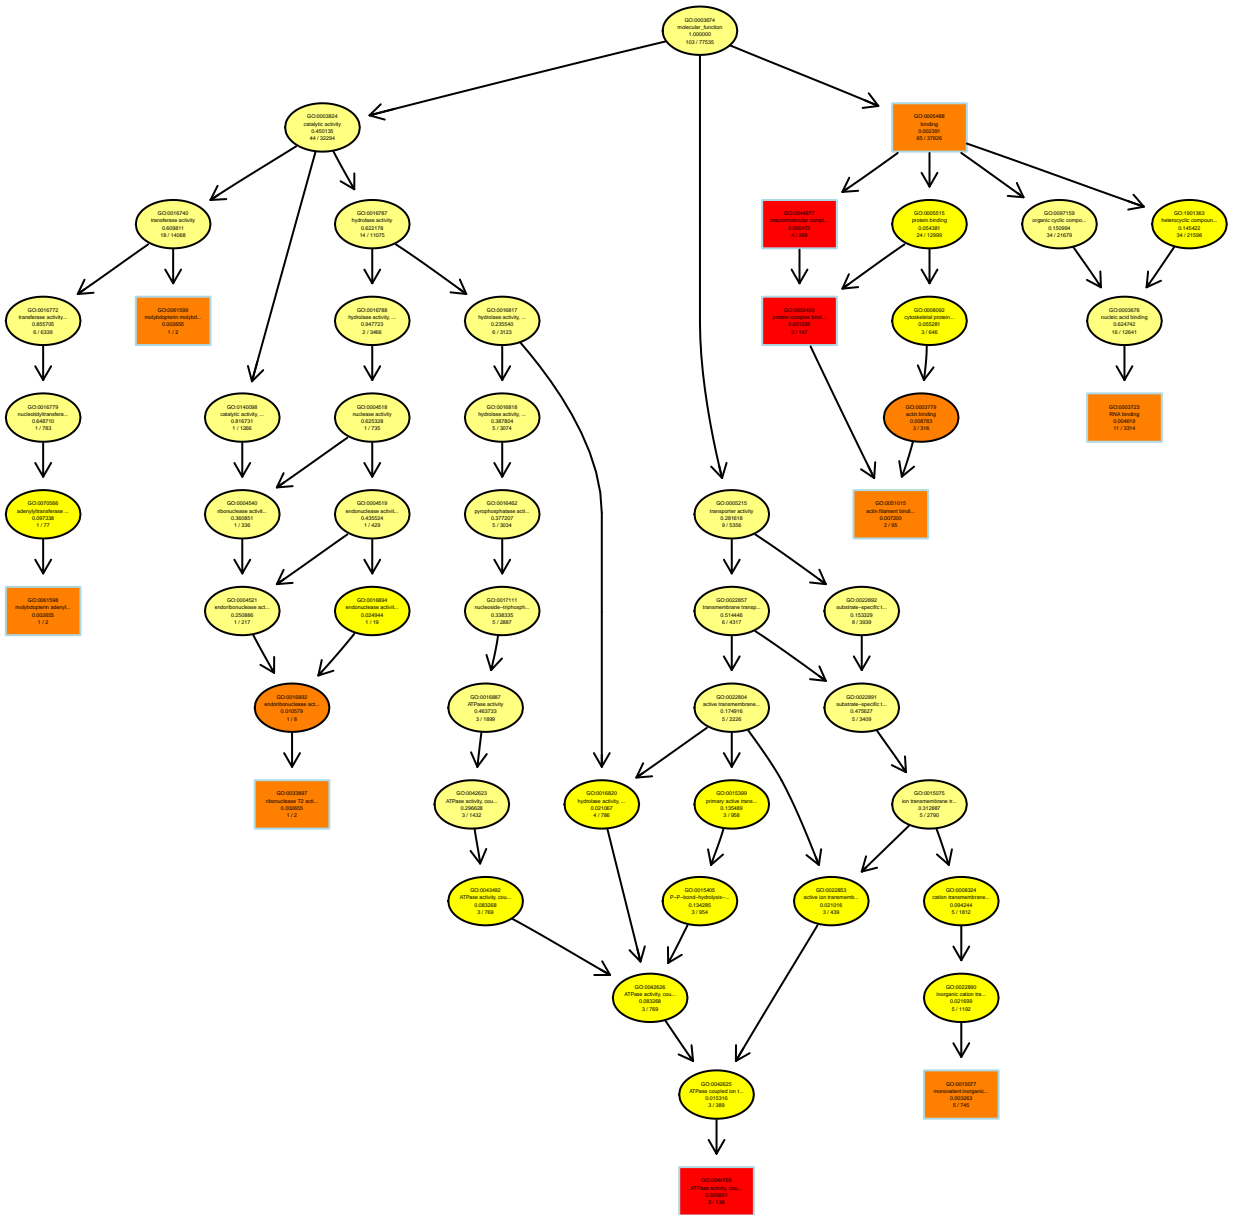

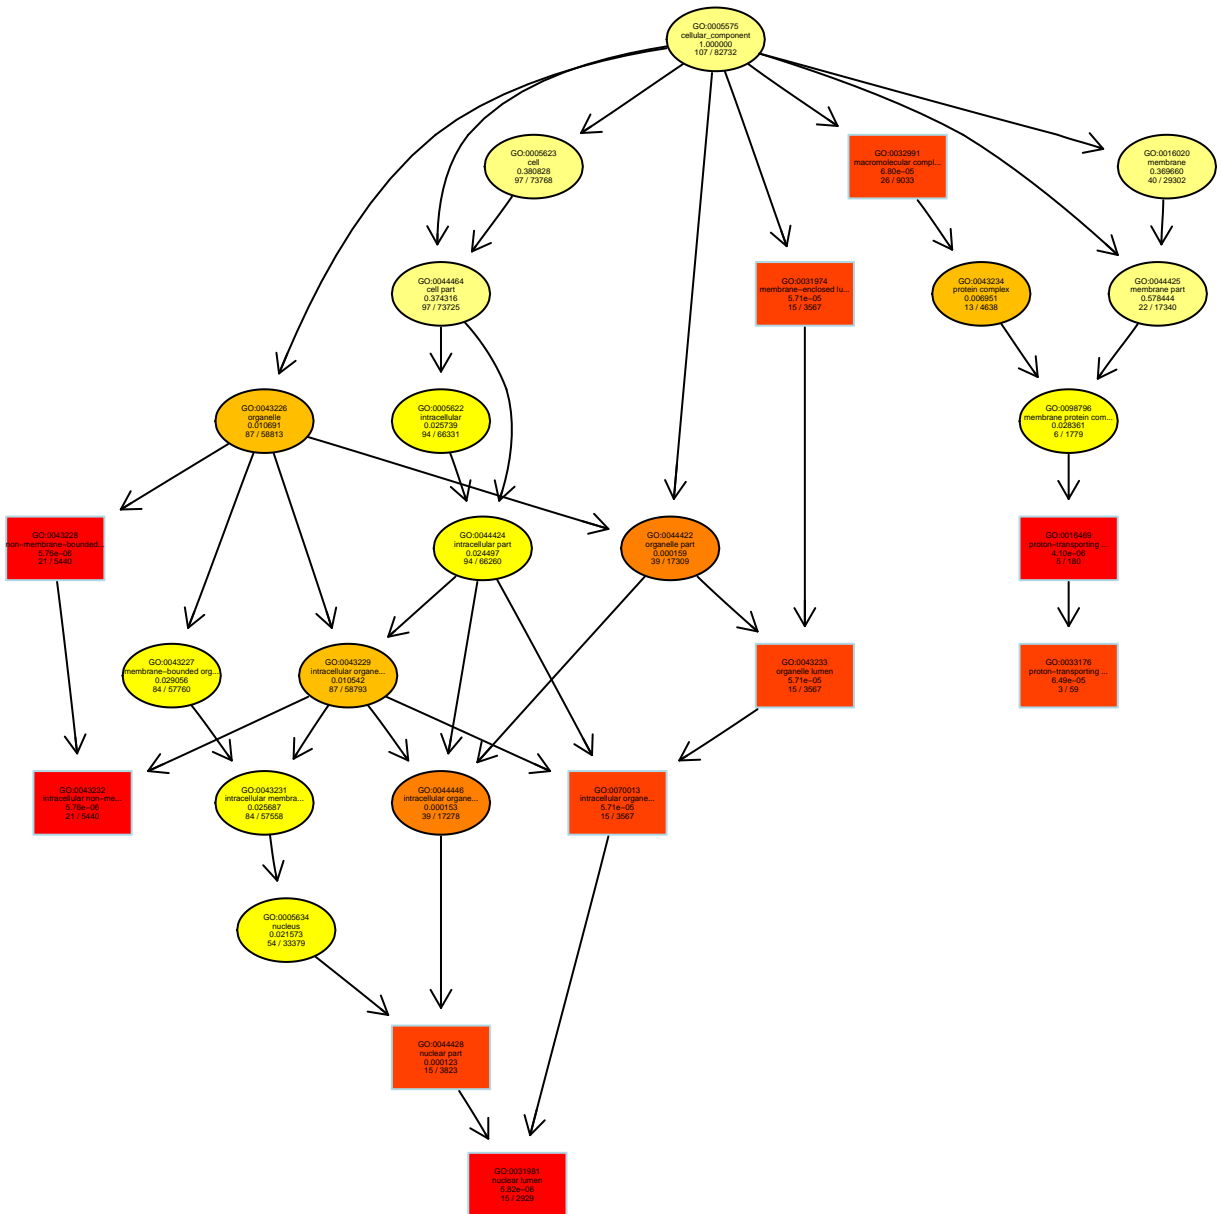

Supplement: s1 [file s1]

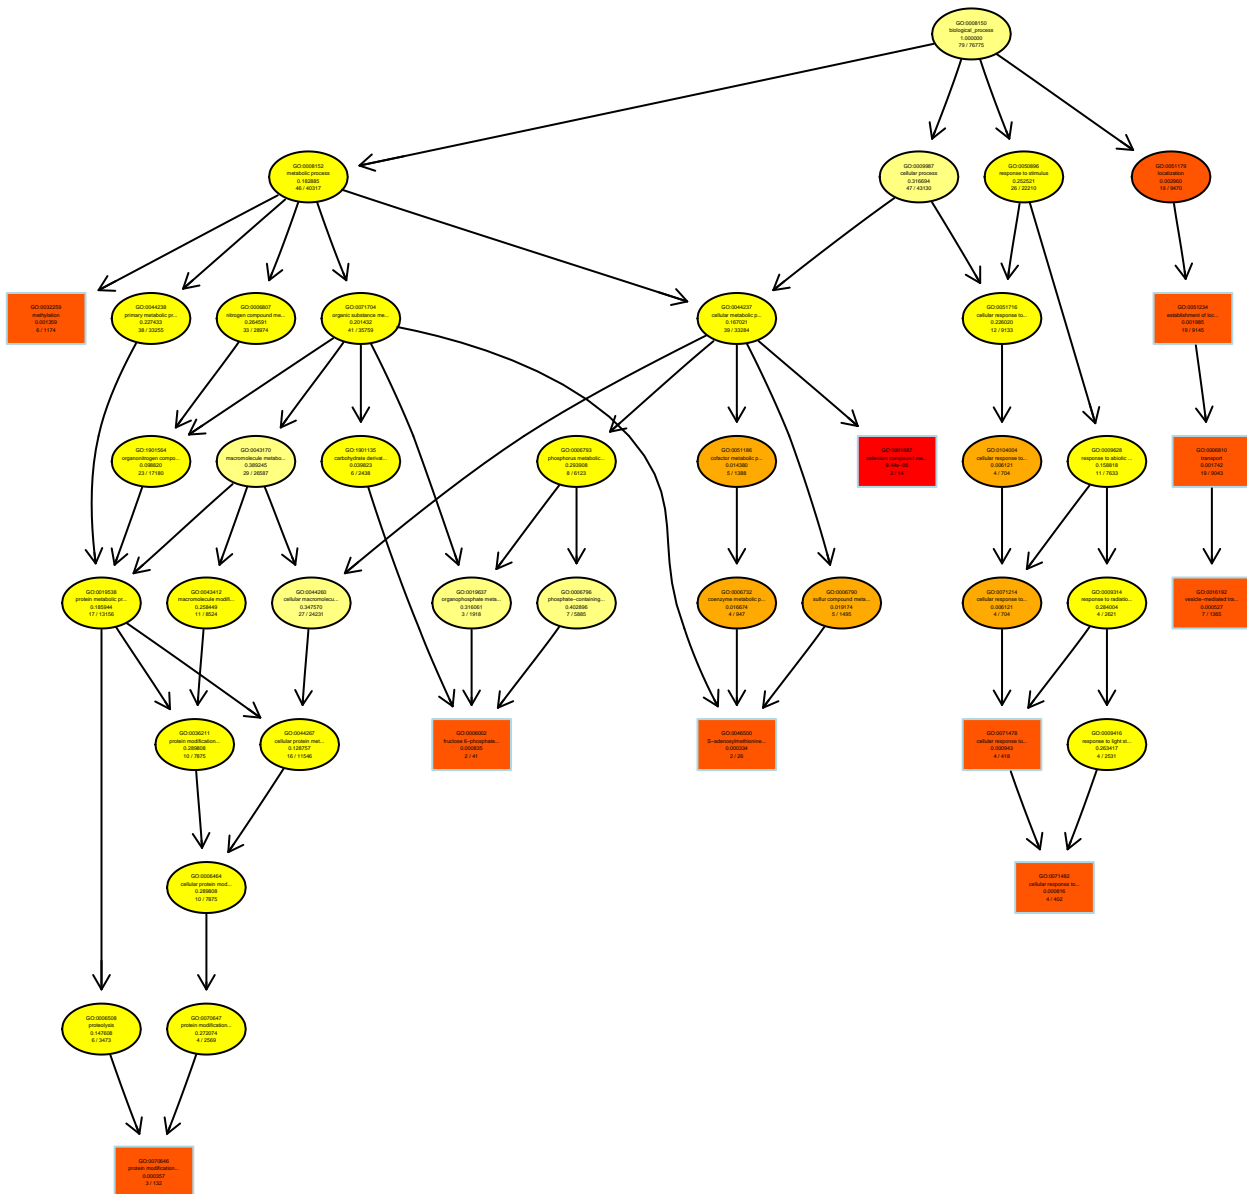

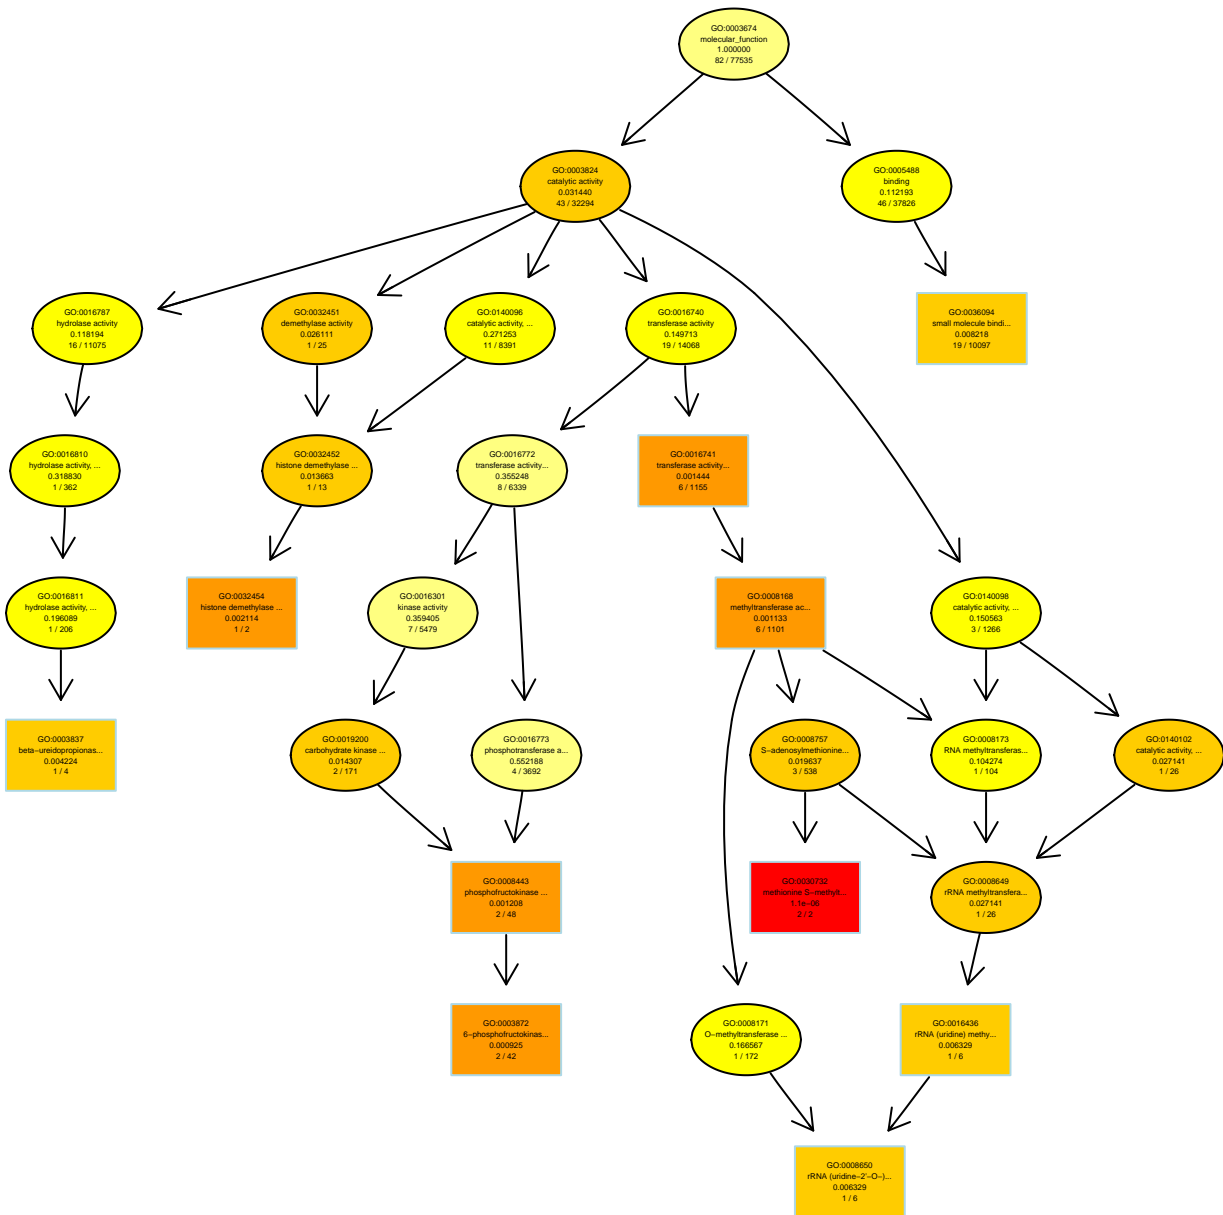

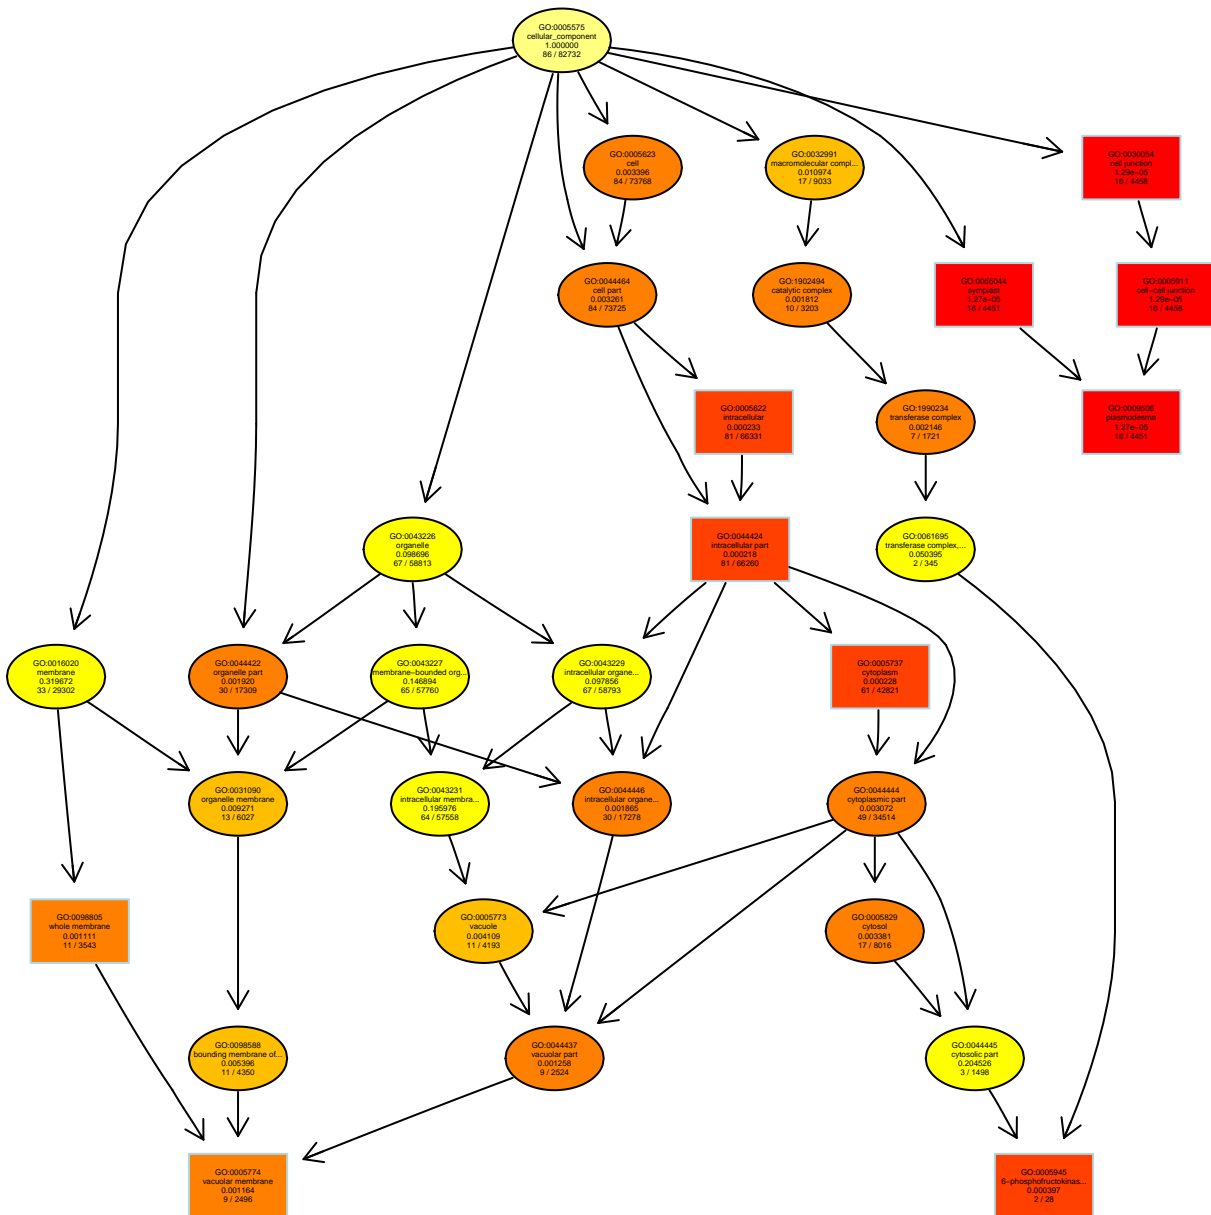

Supplement: s1 [file s1]

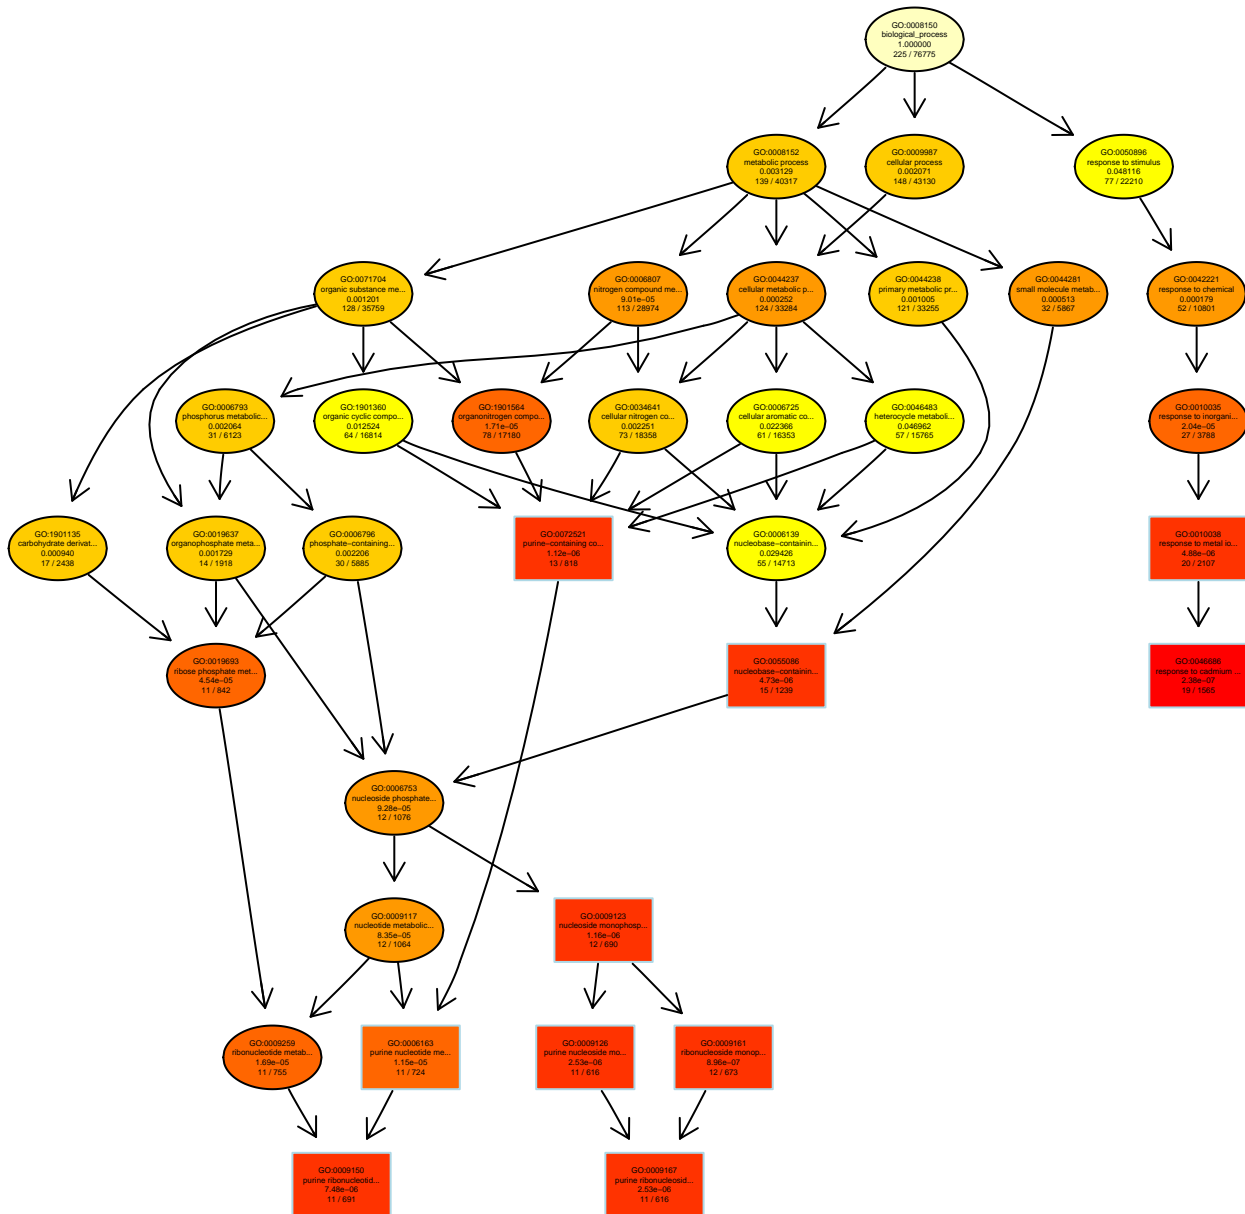

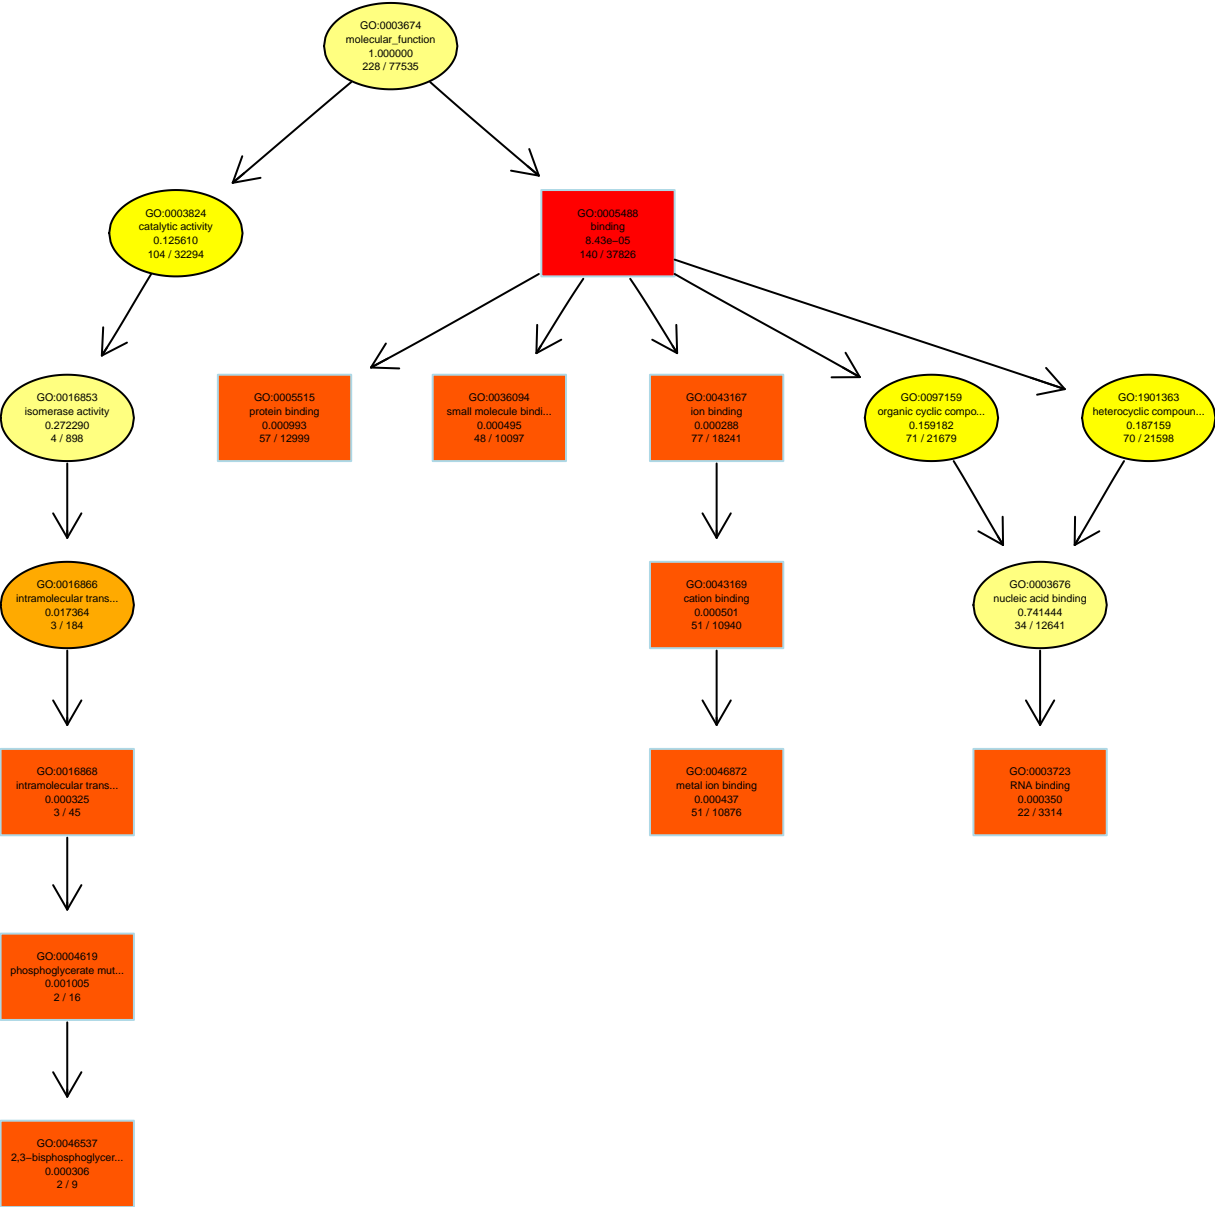

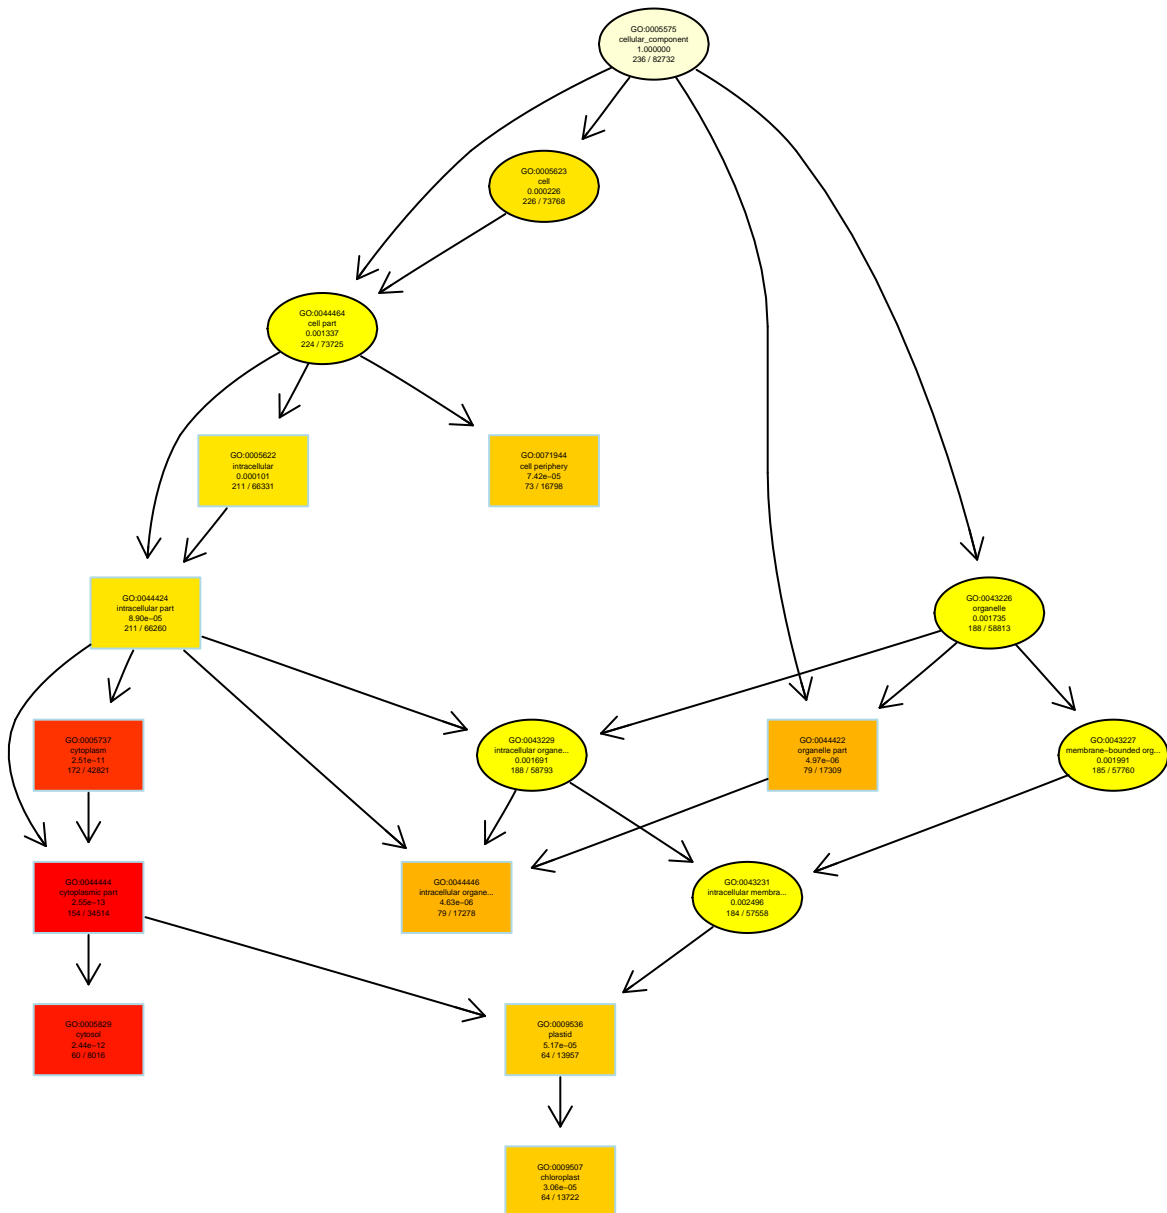

Supplement: s1 [file s1]

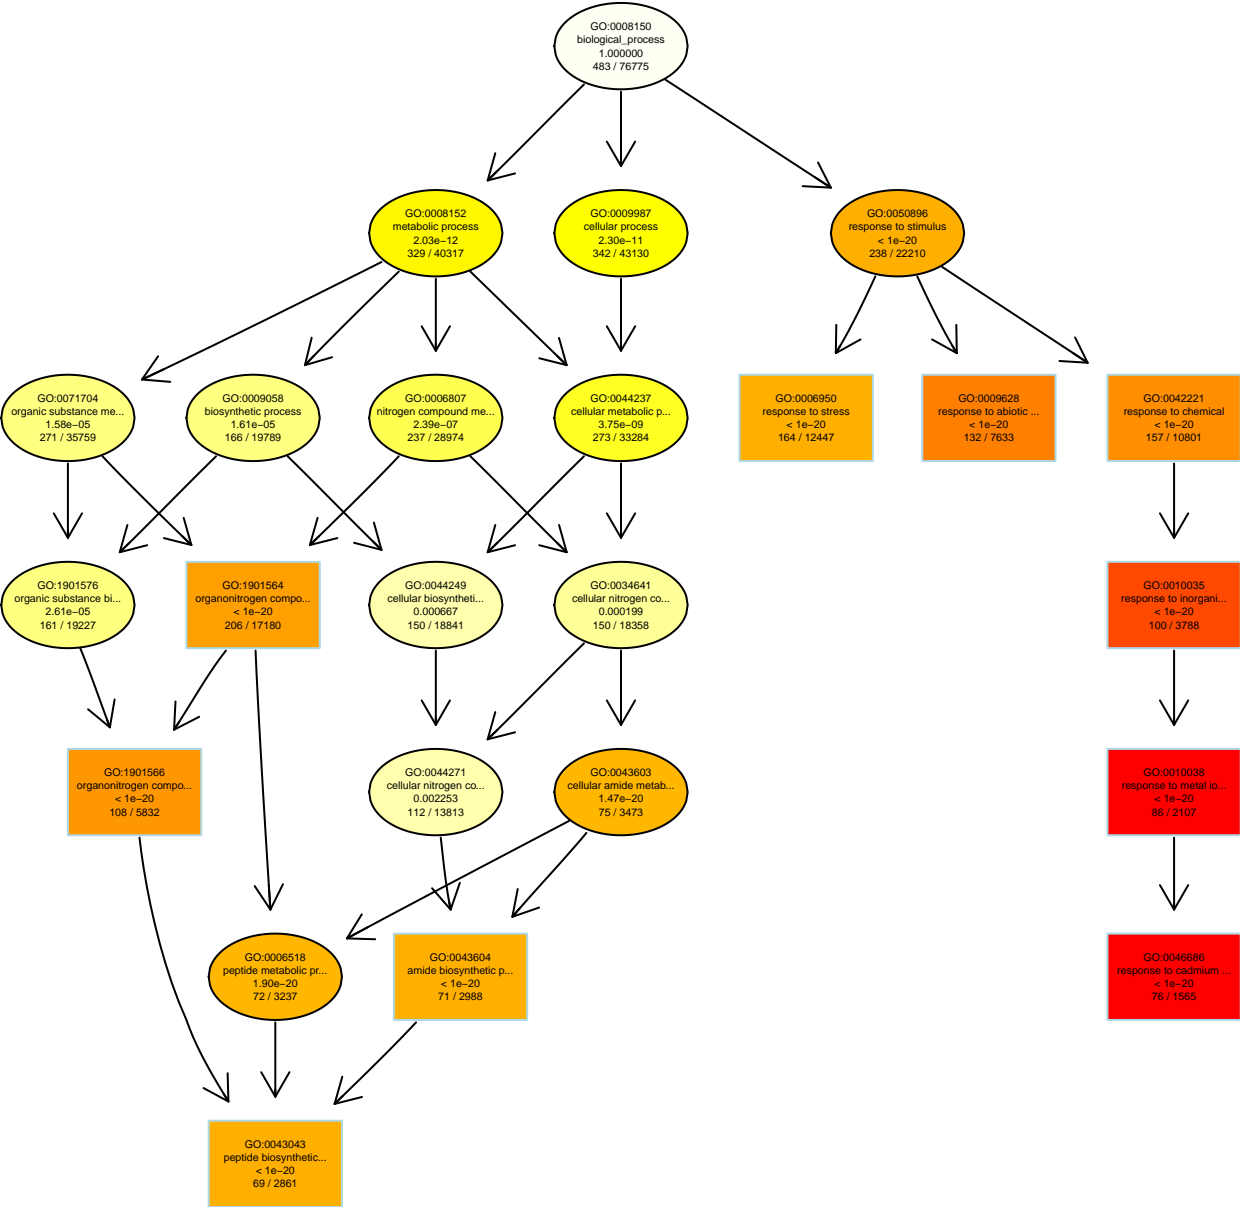

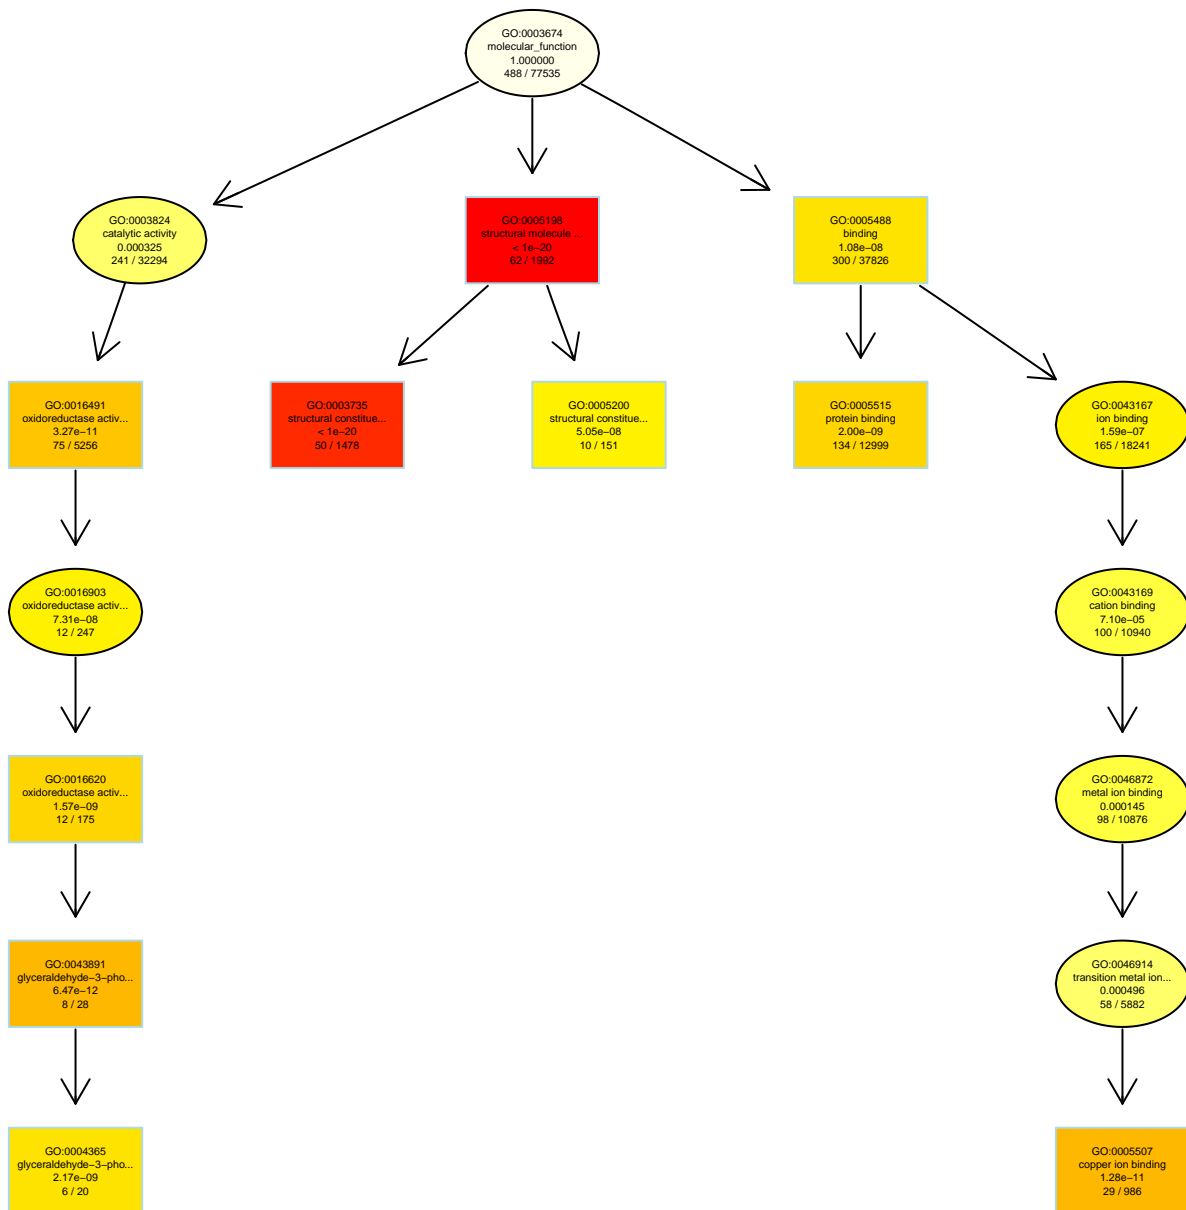

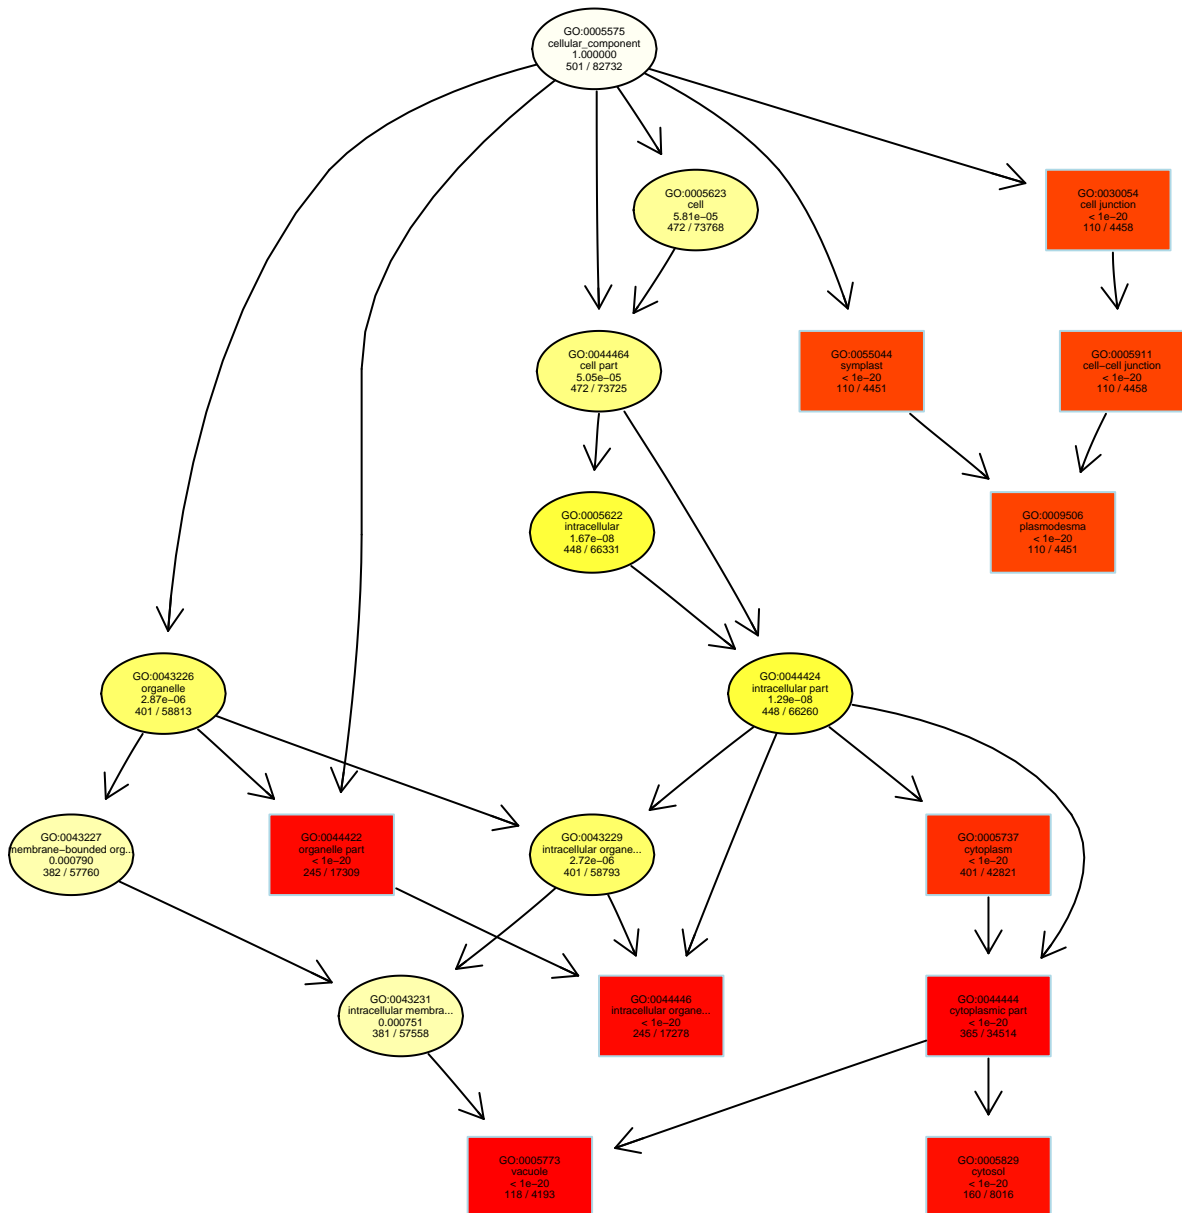

Supplement: s1 [file s1]

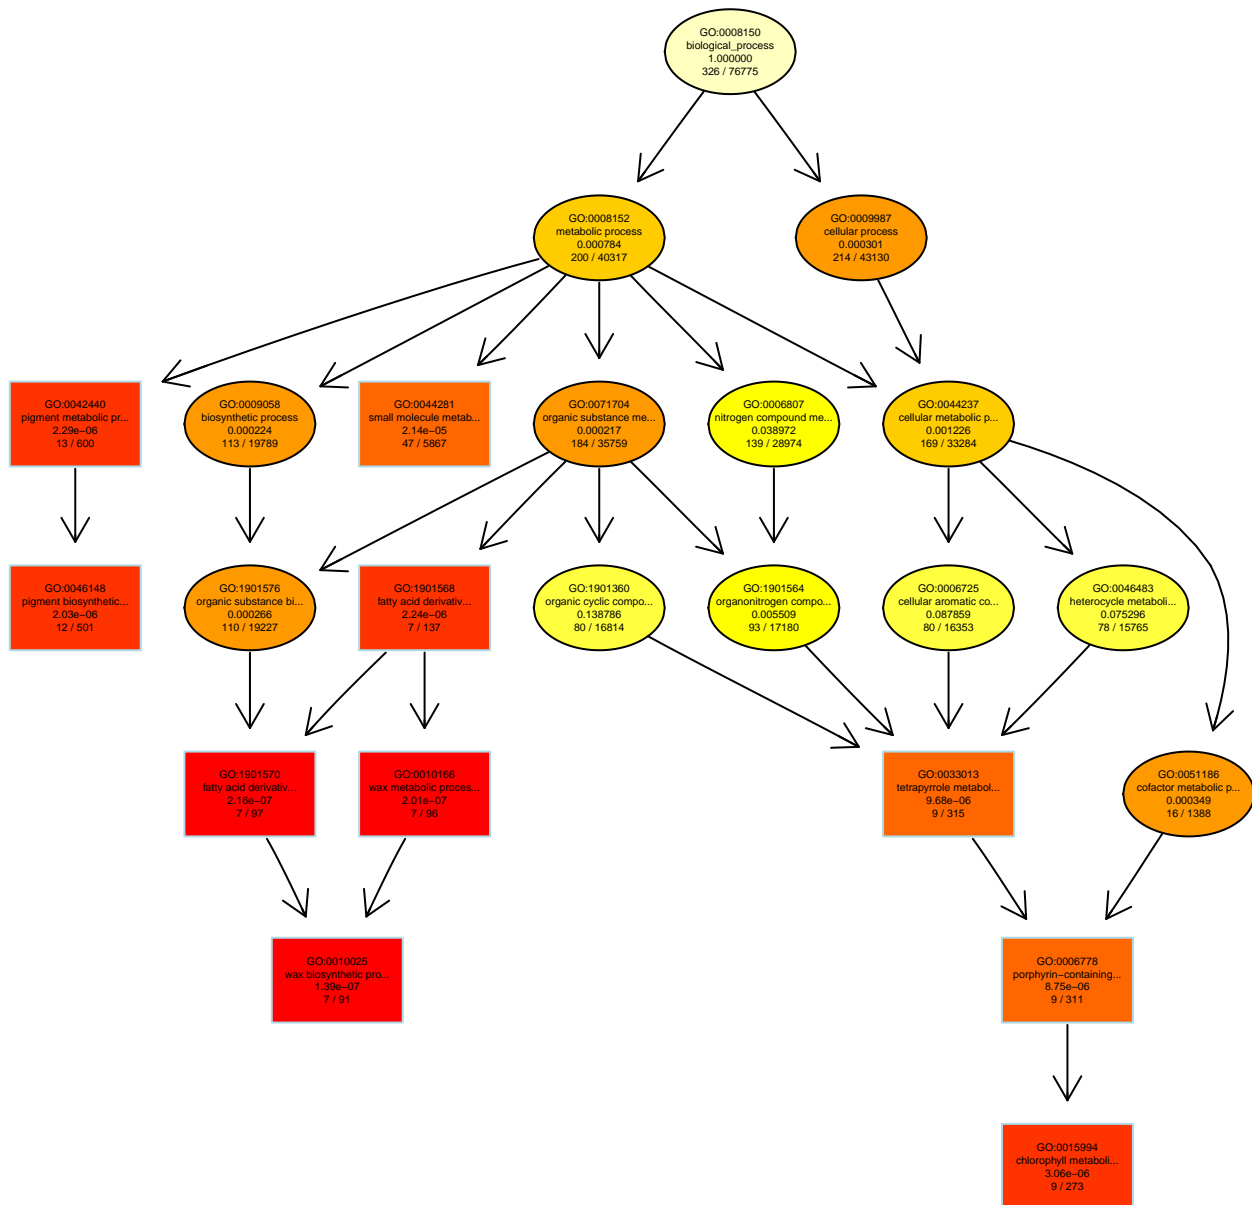

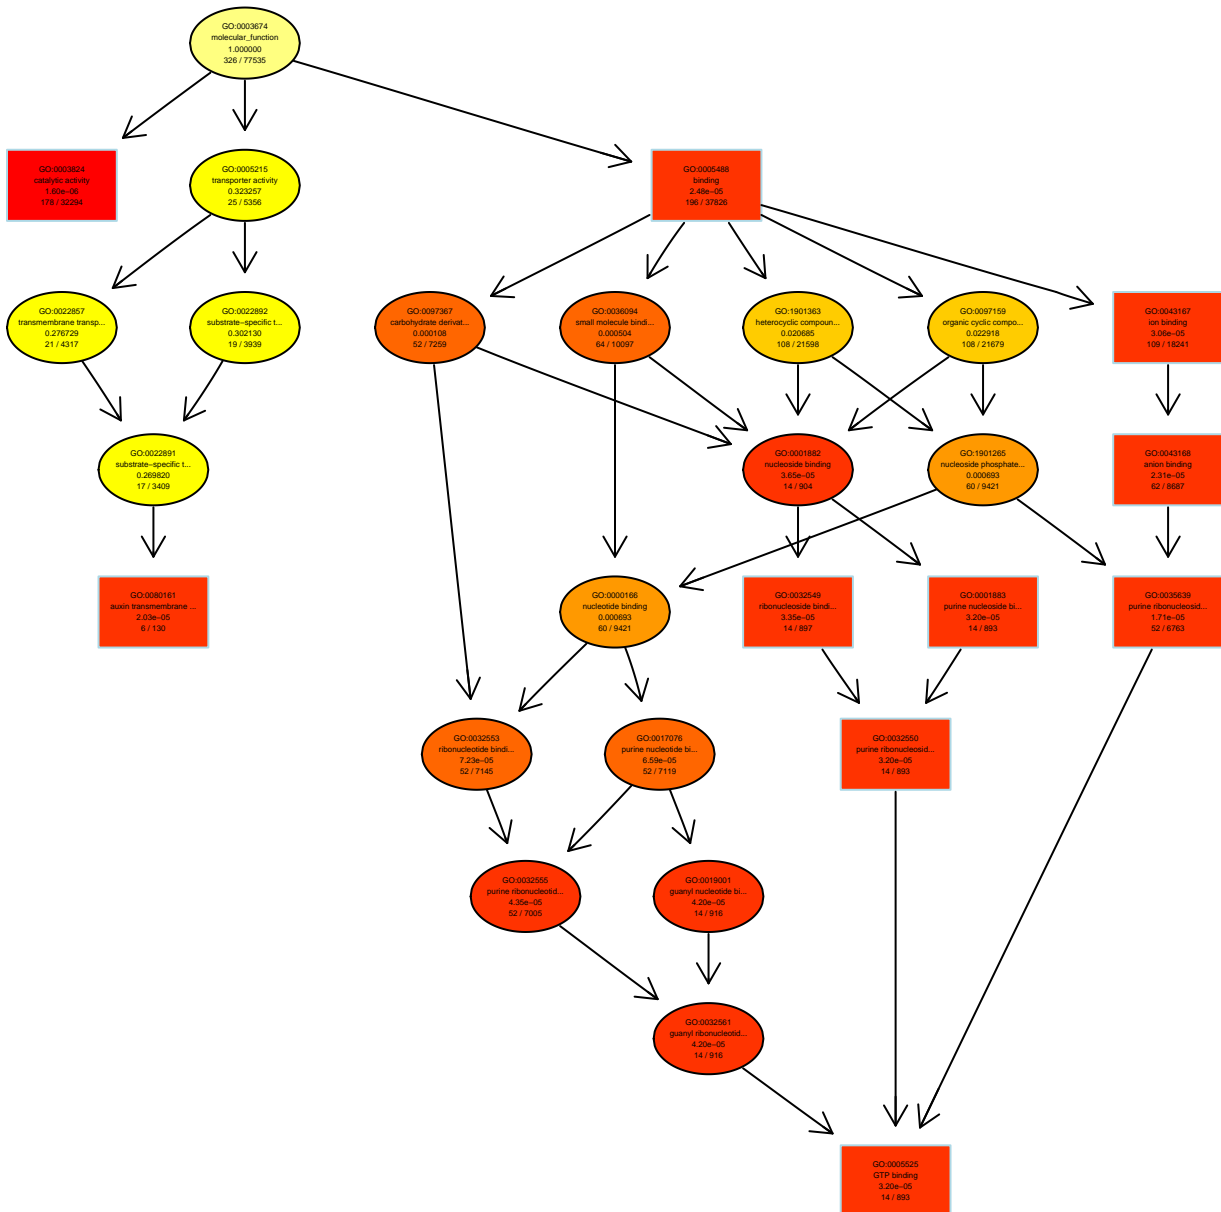



Supplement: s1 [file s1]

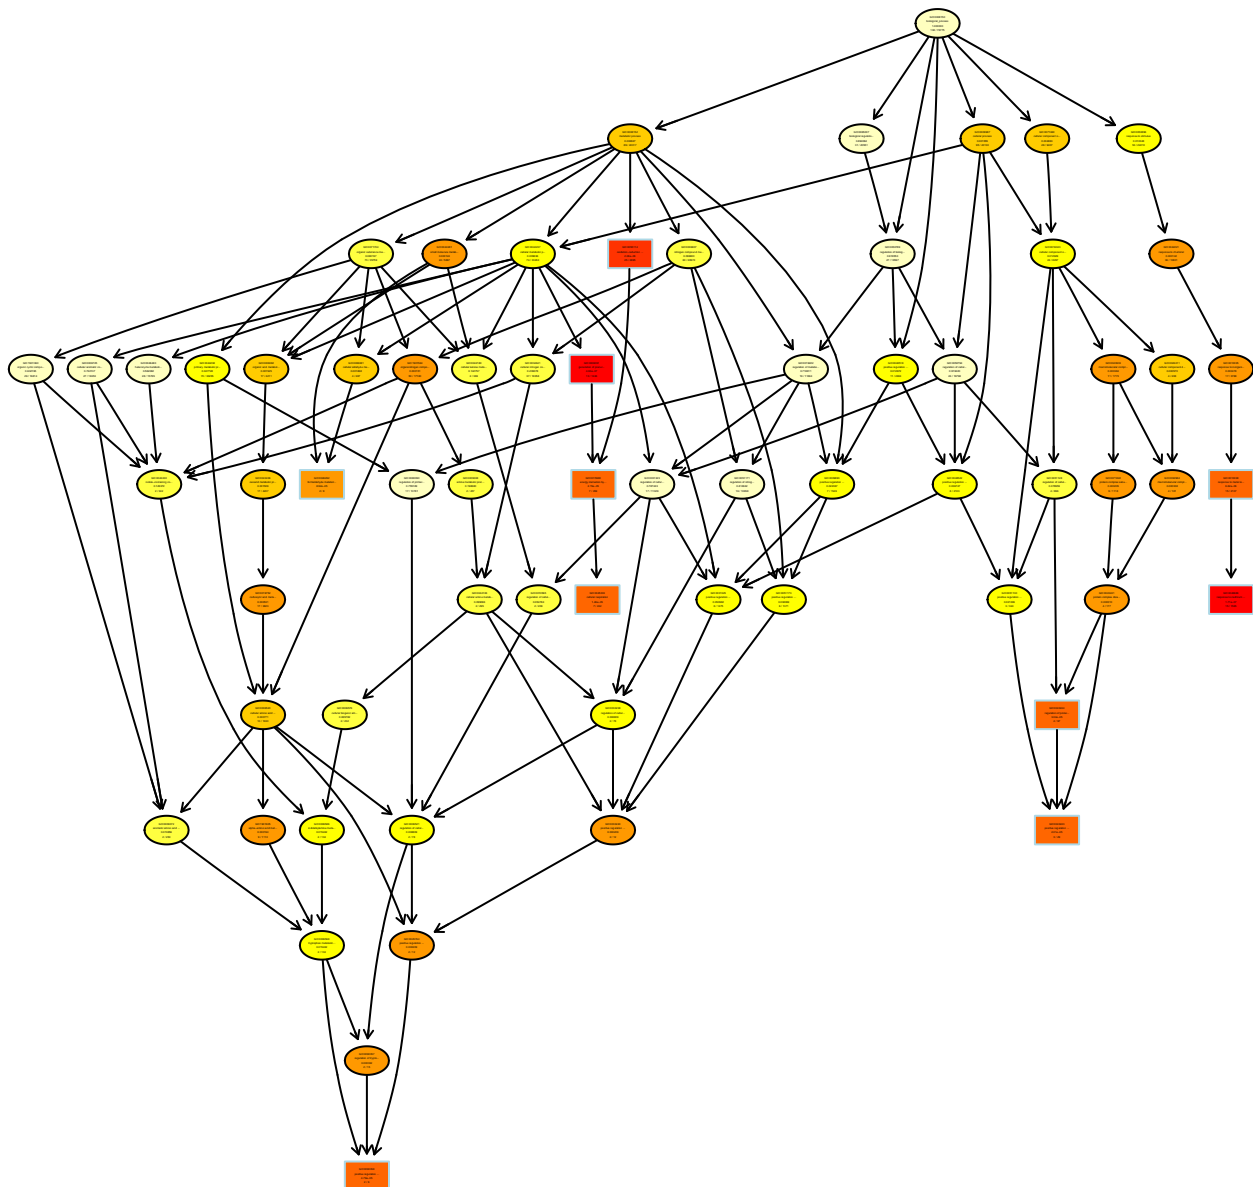

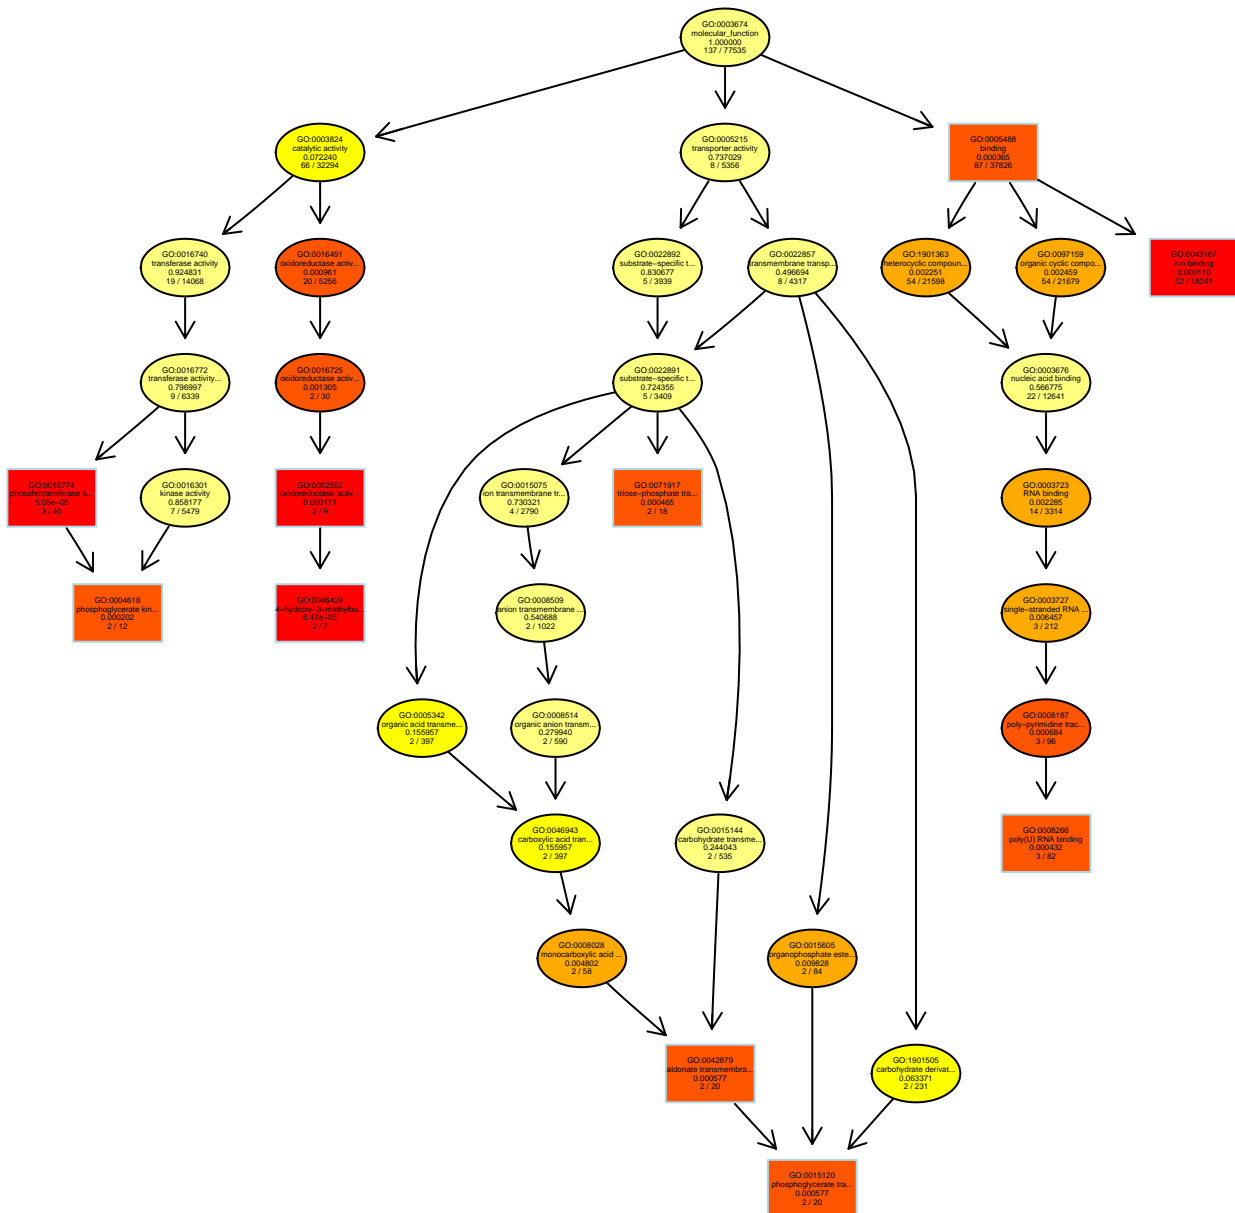

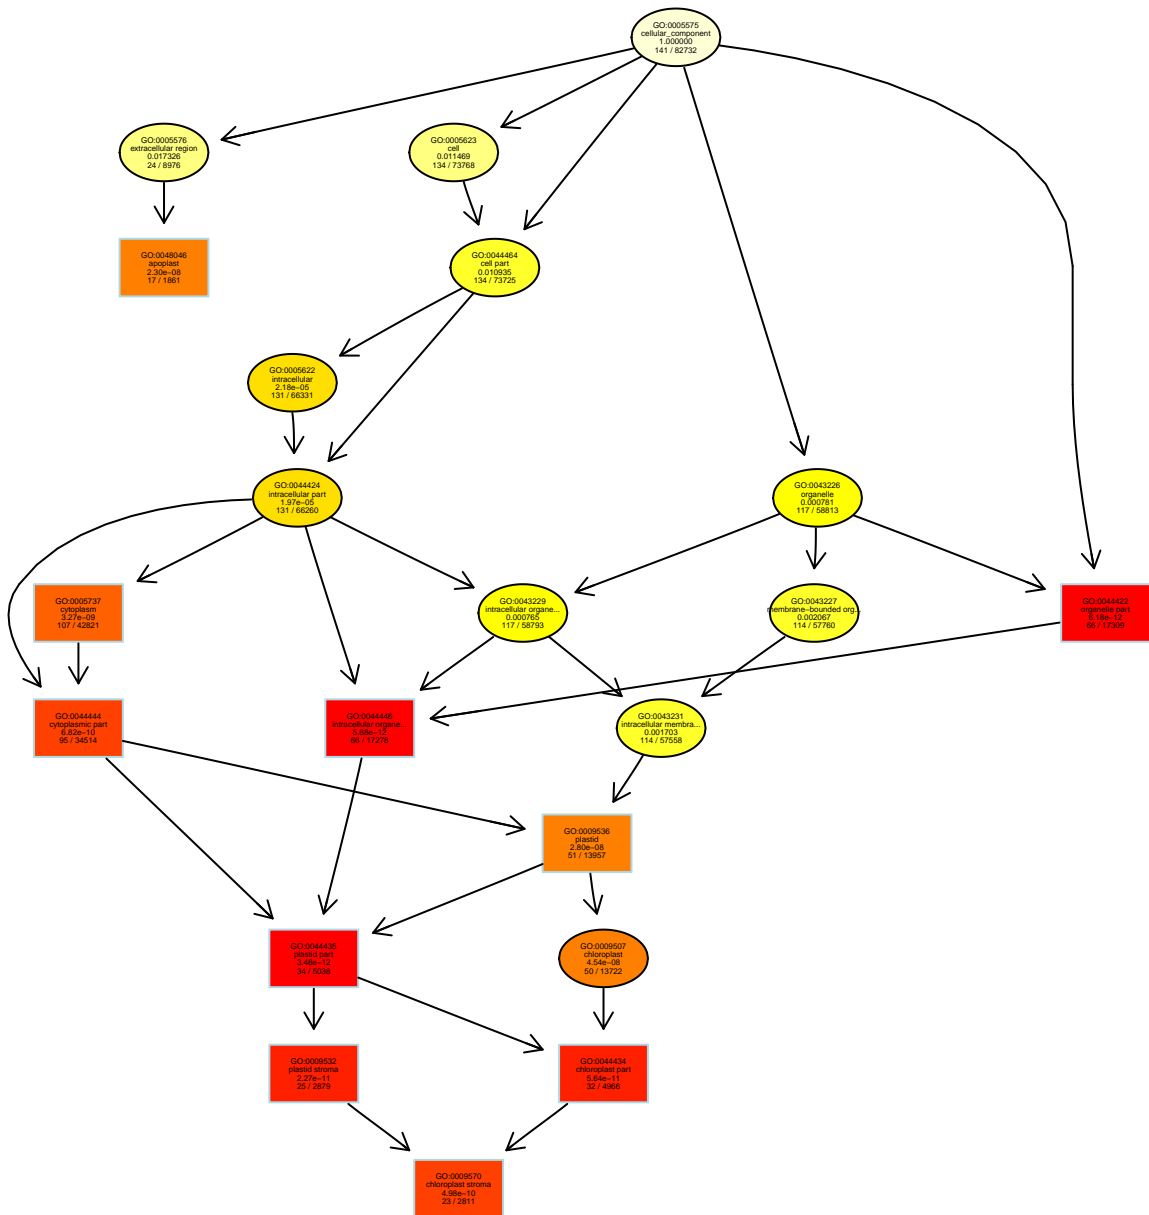

Supplement: s1 [file s1]

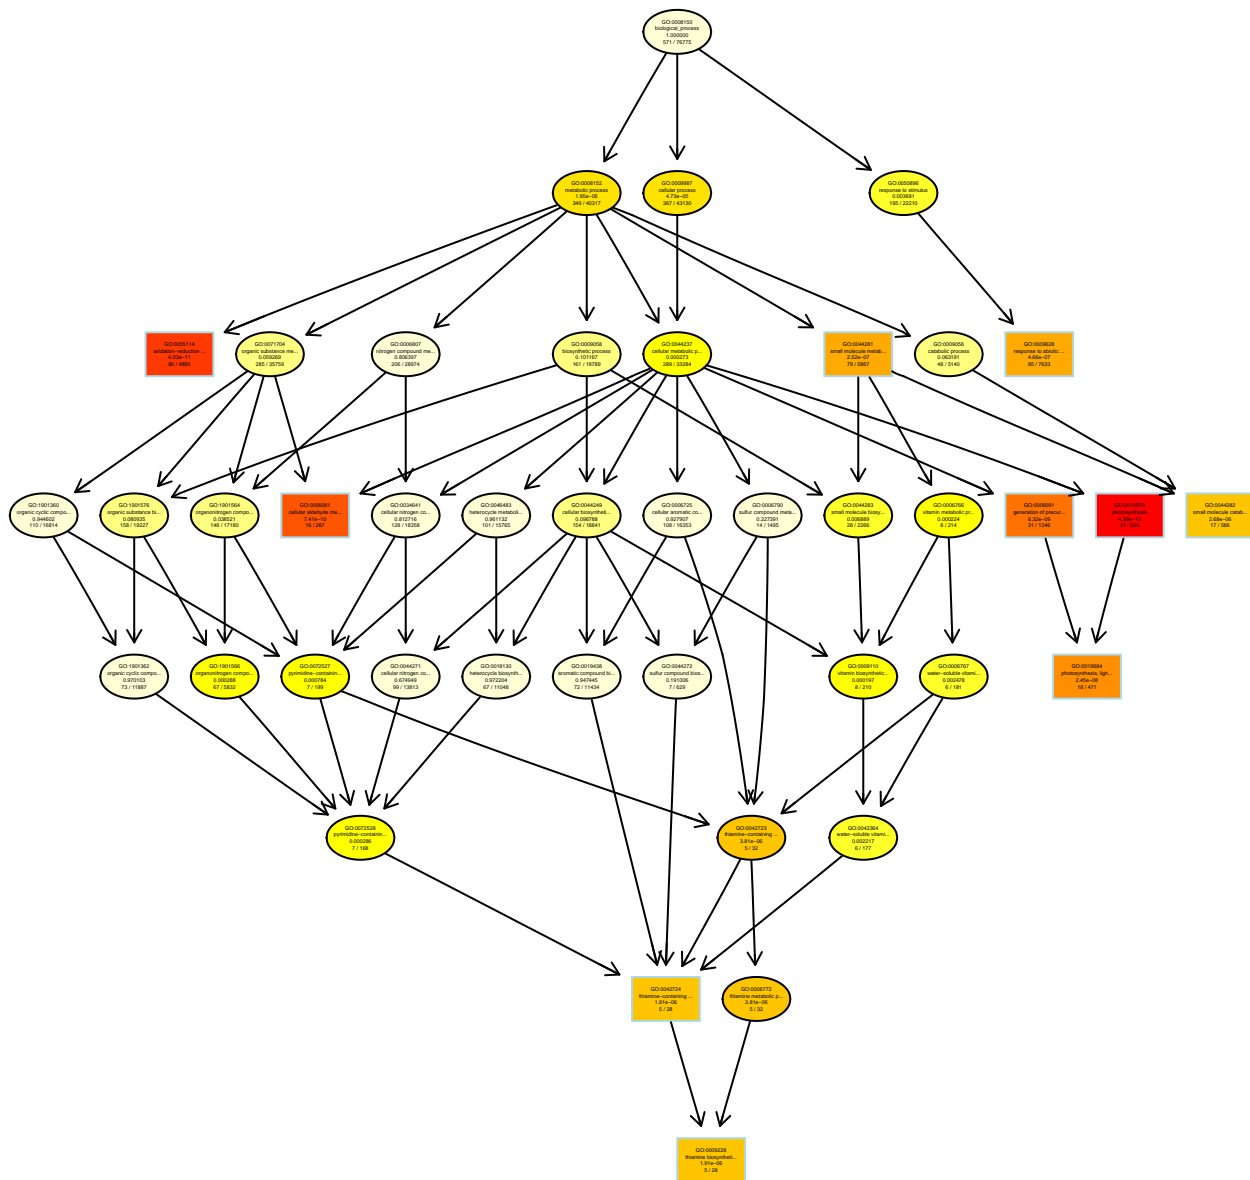

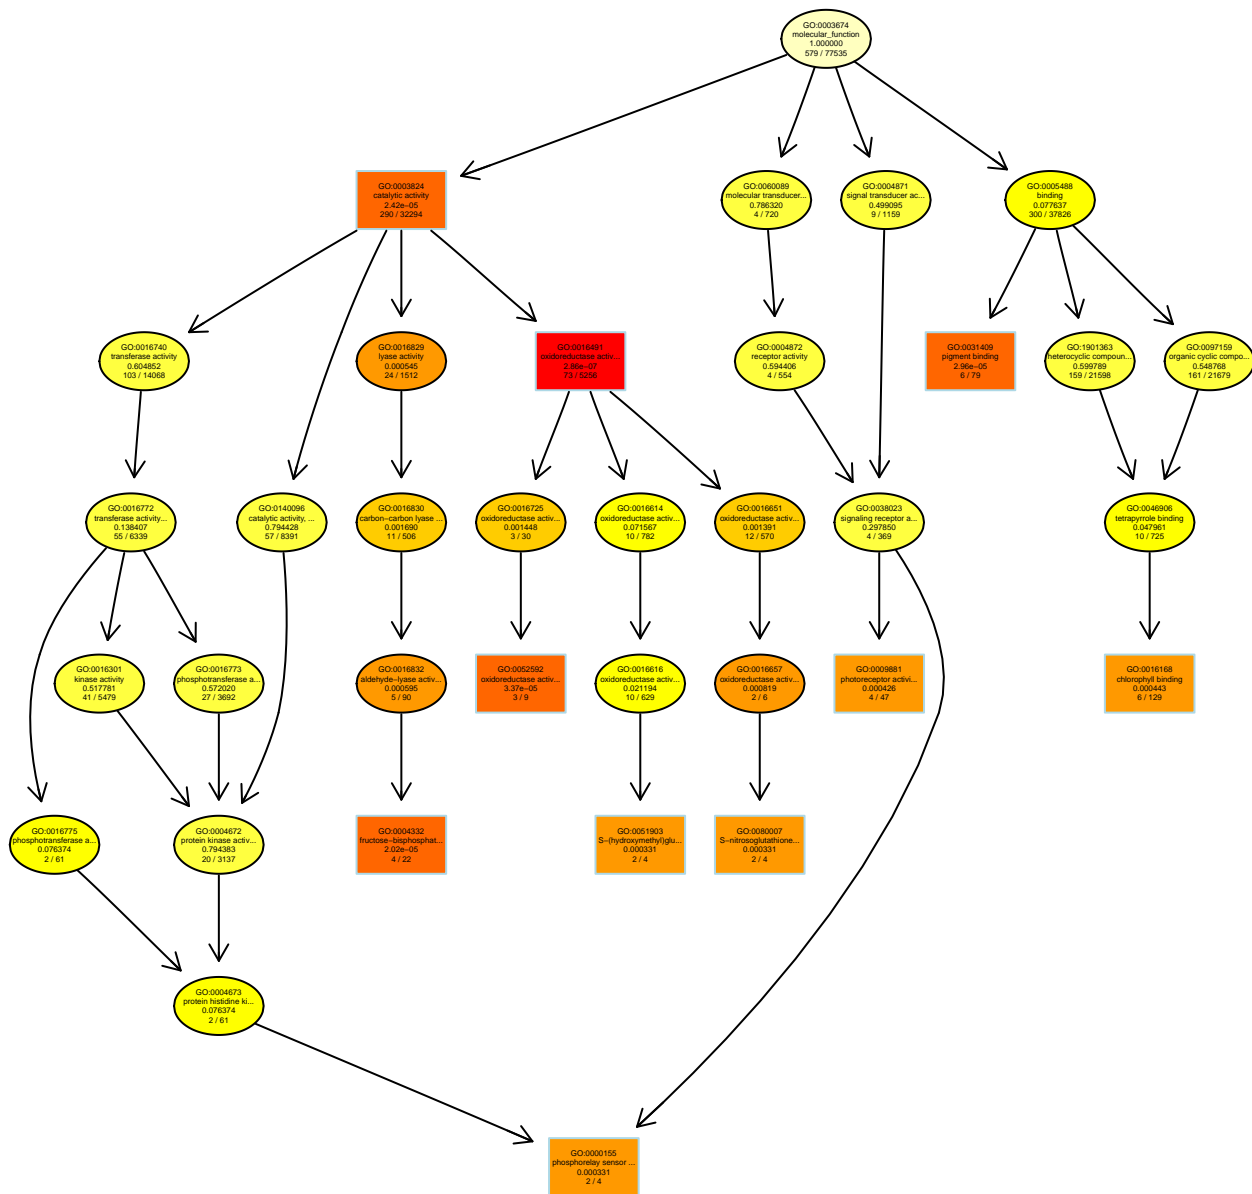

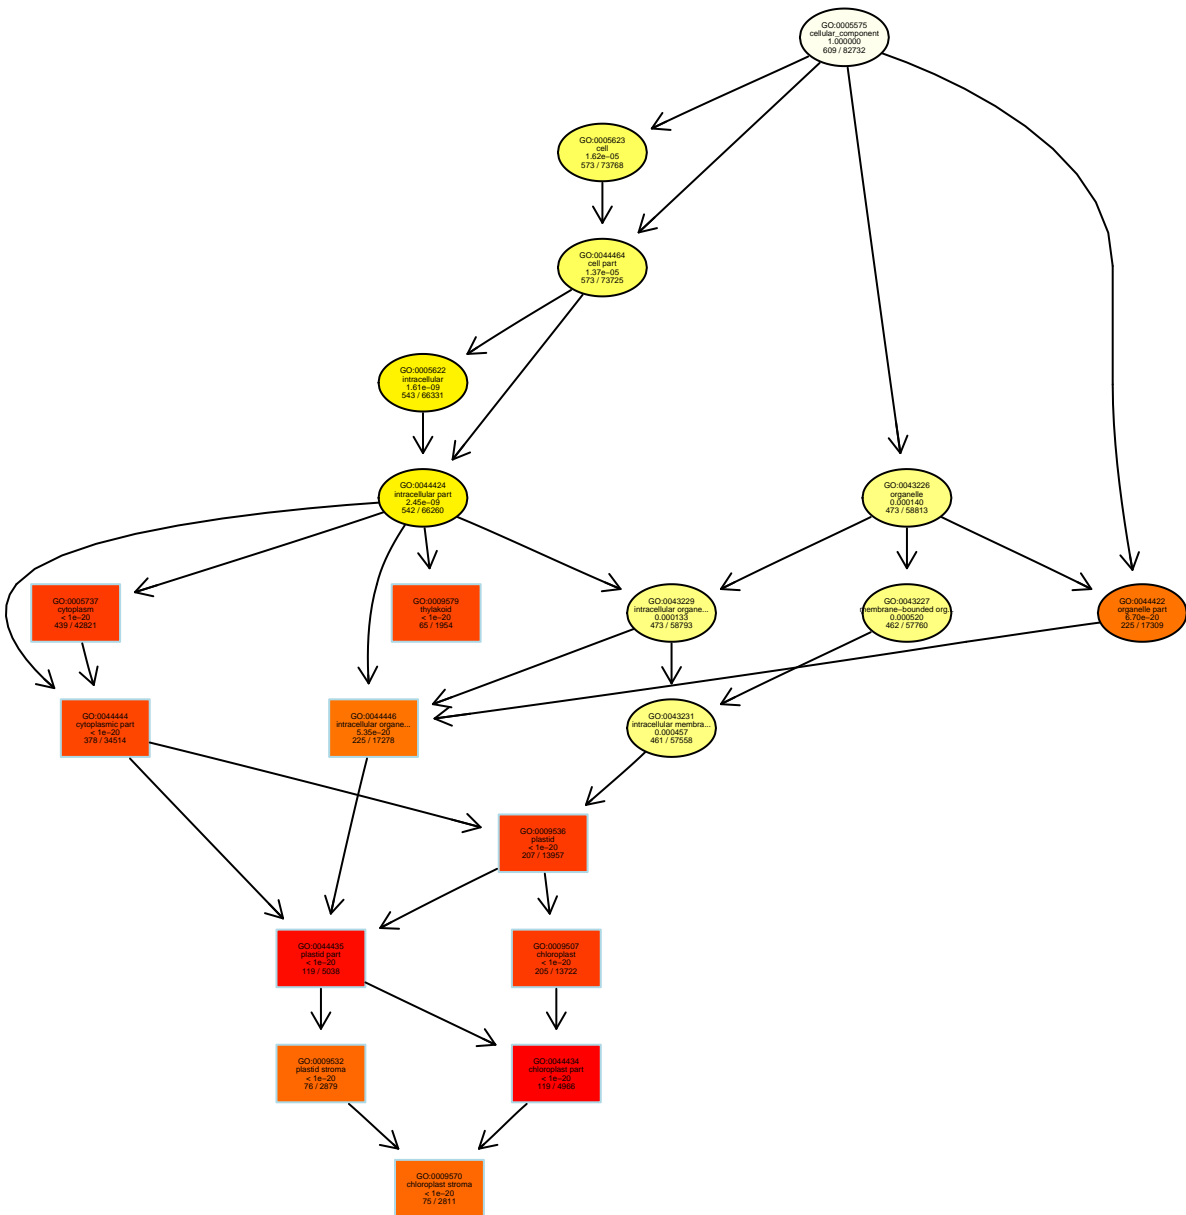

Supplement: s1 [file s1]

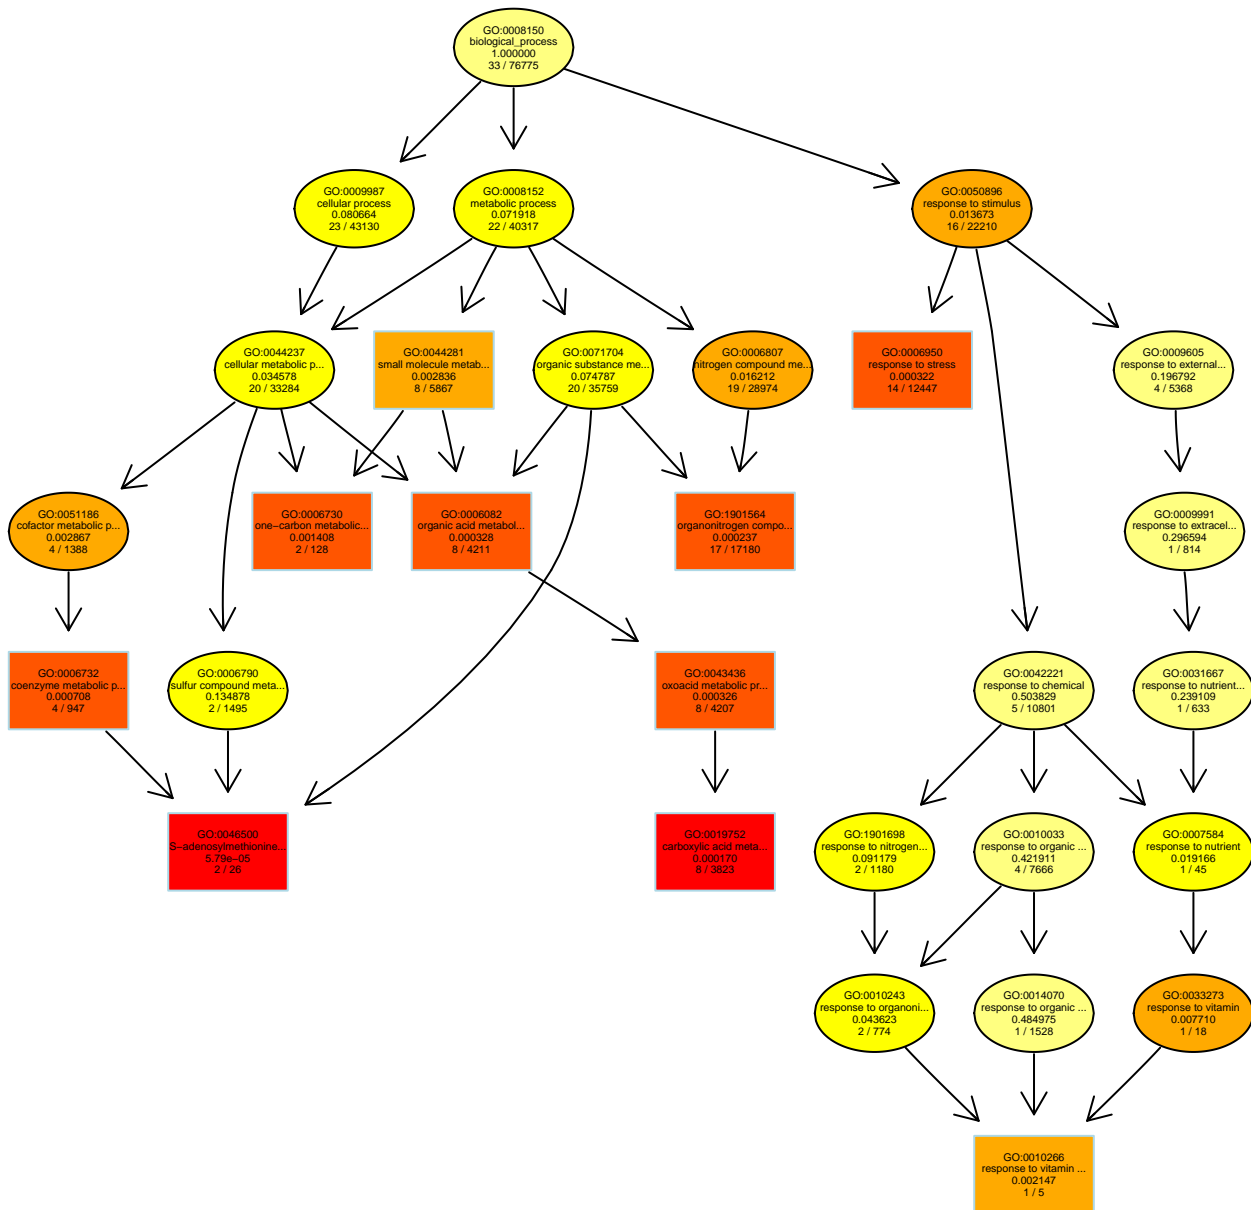

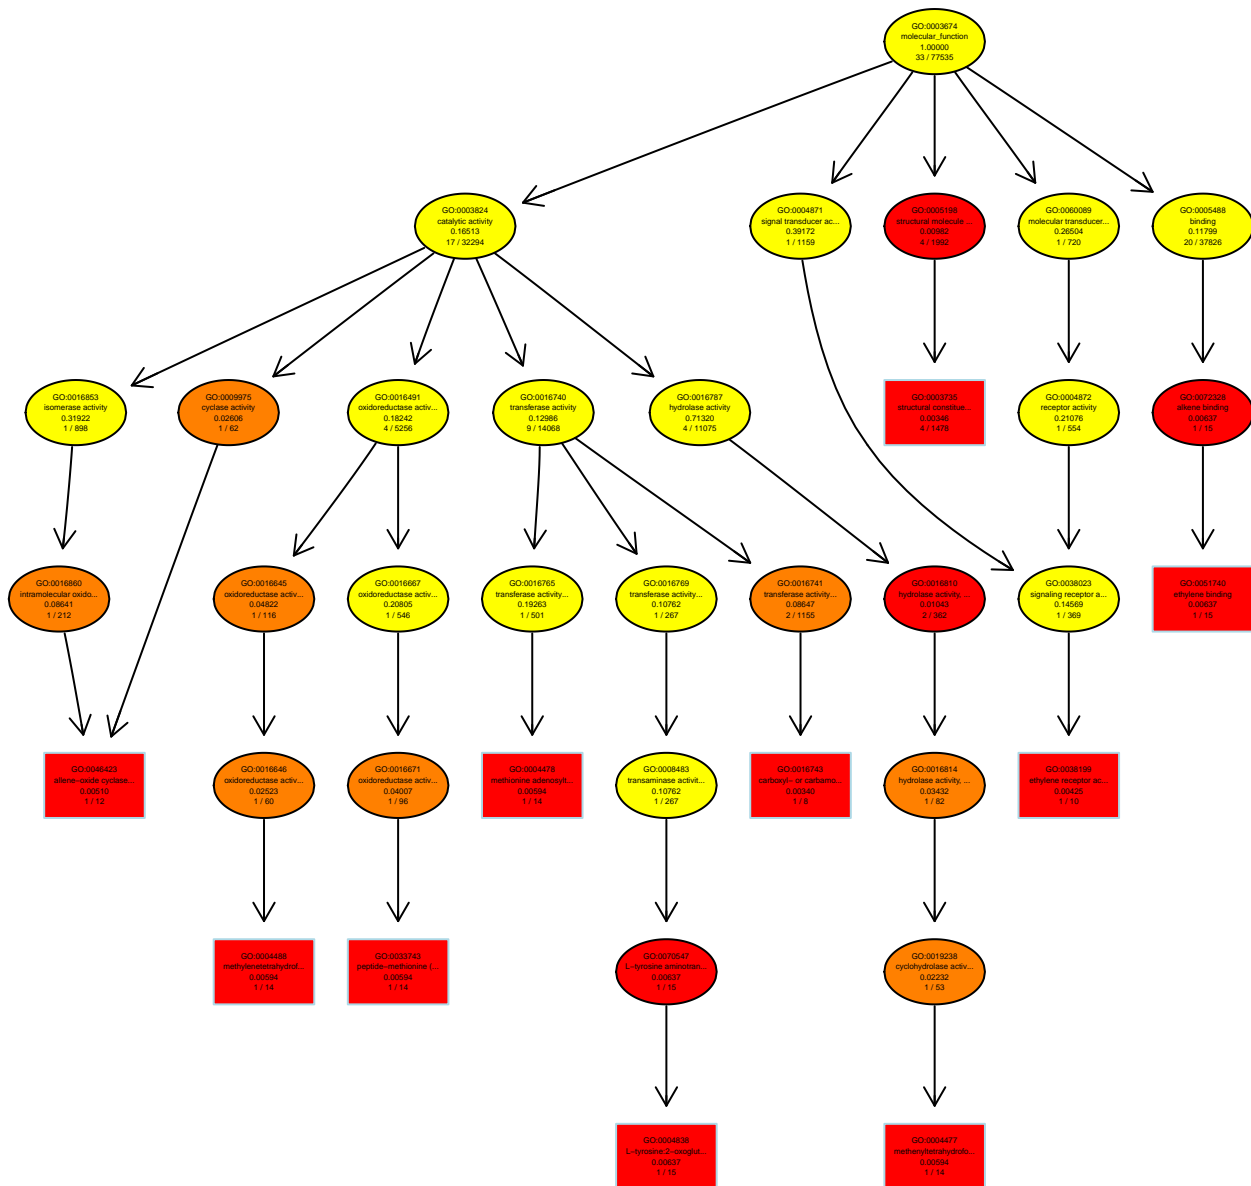

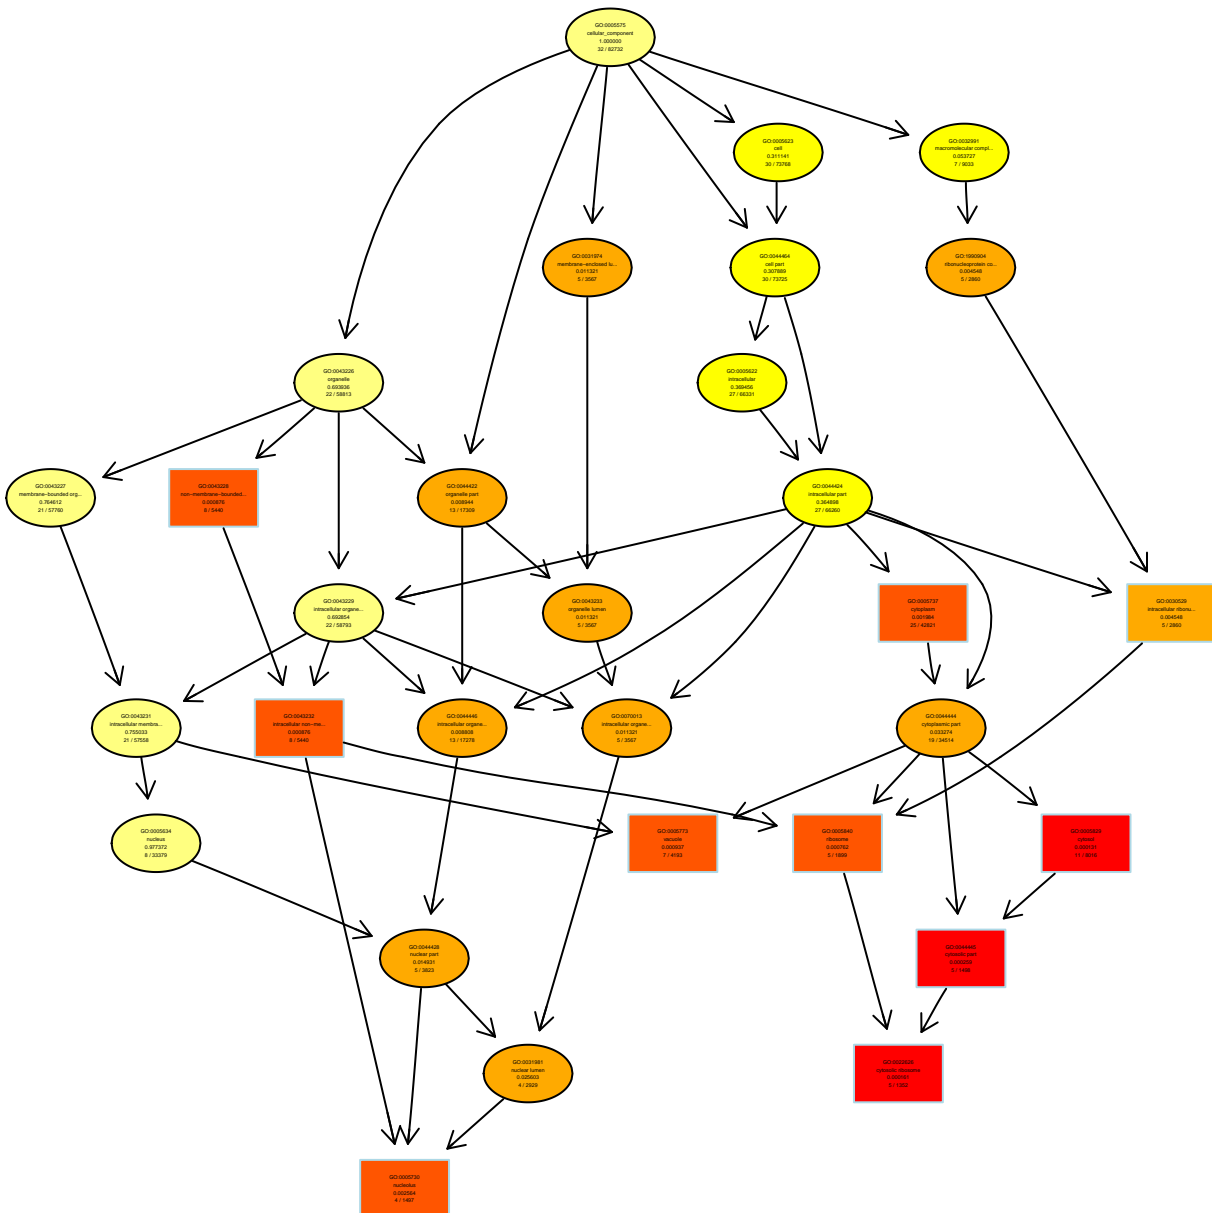

Supplement: s1 [file s1]

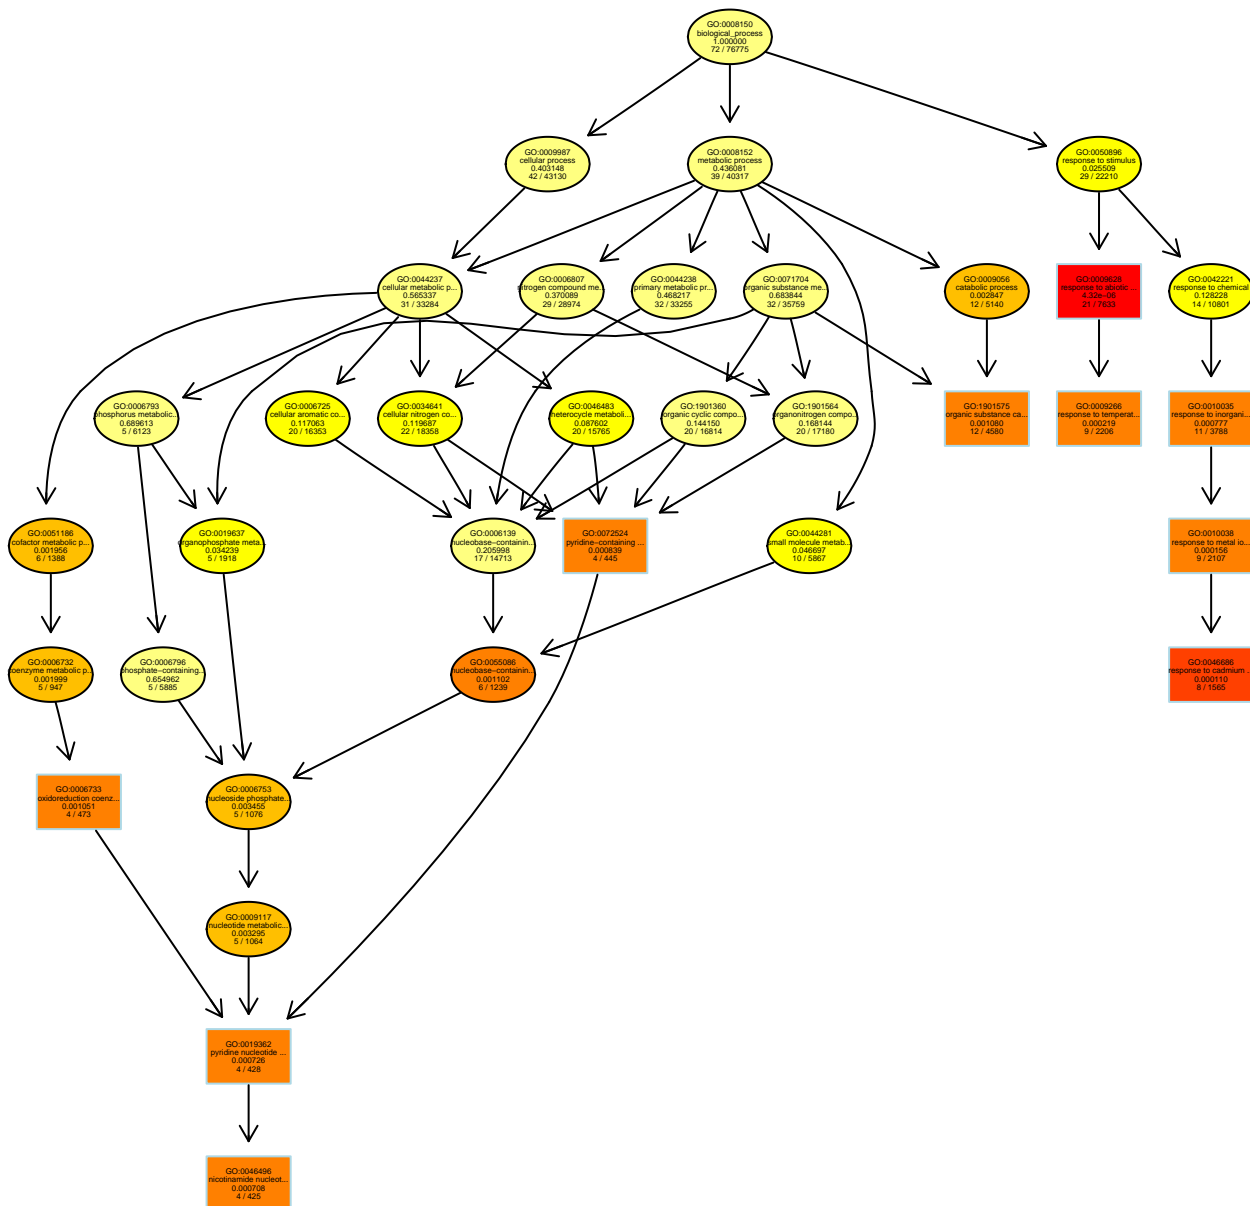

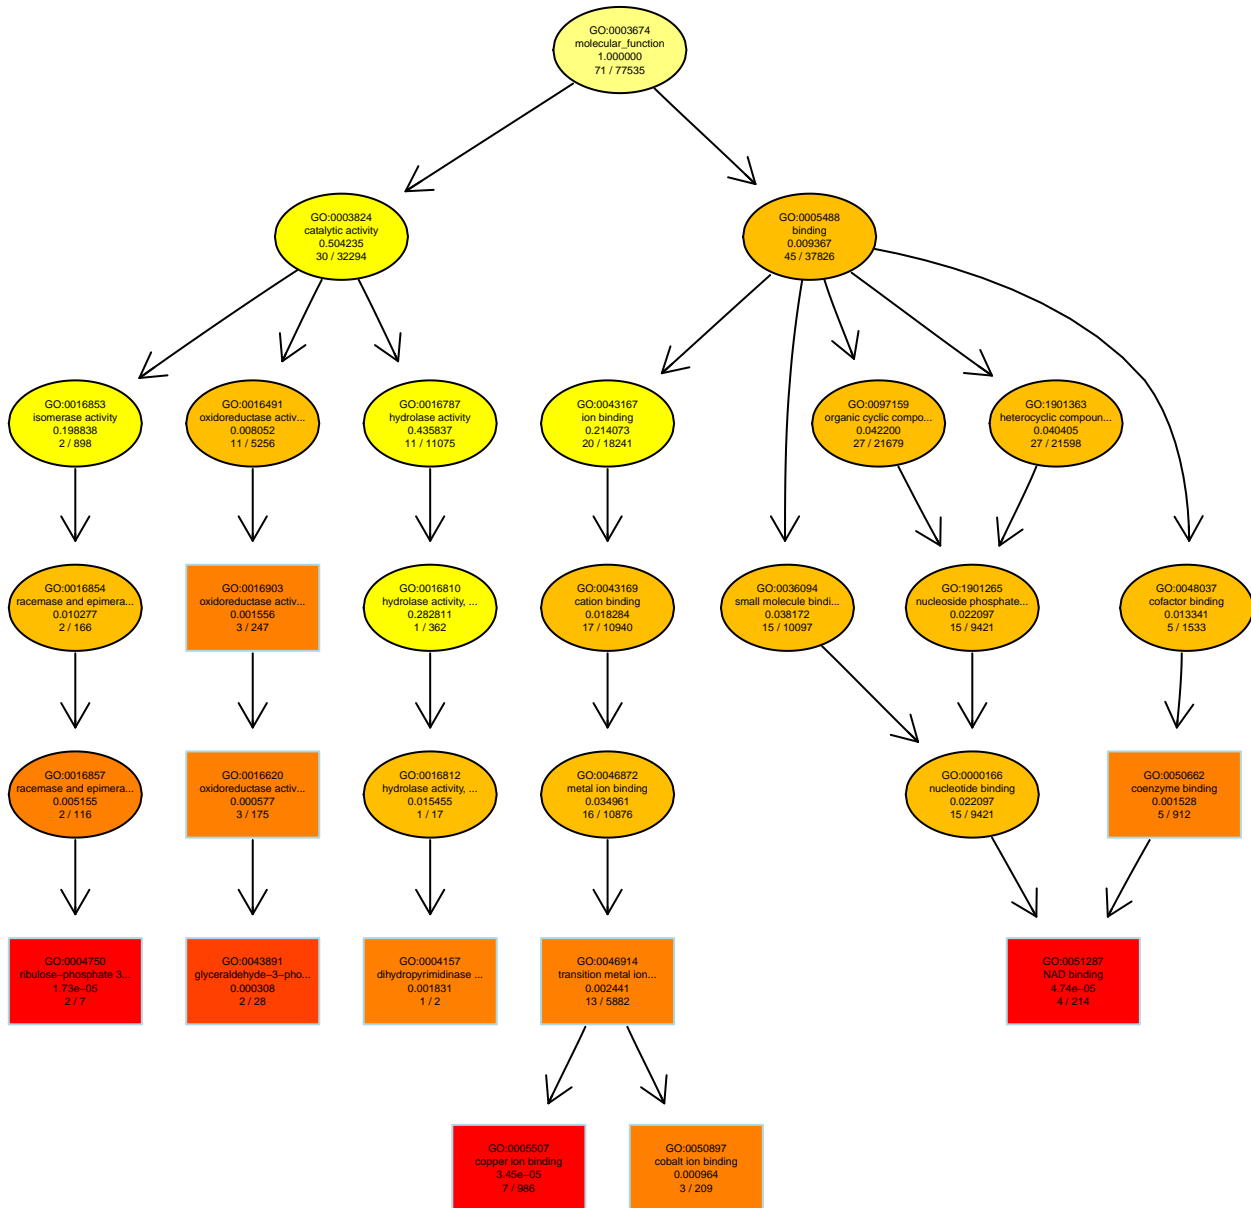

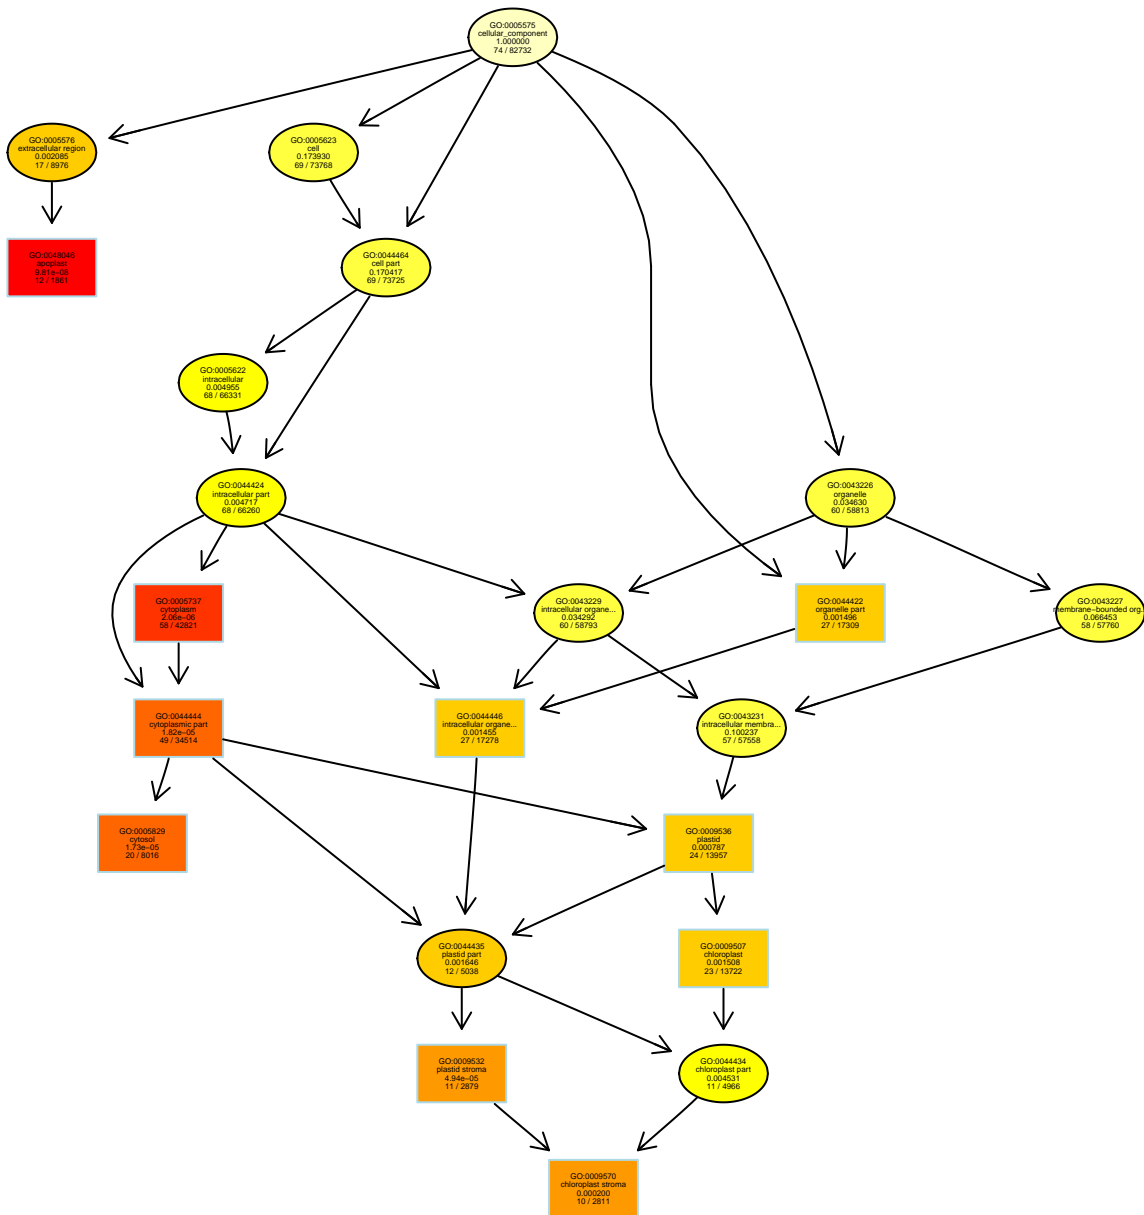

Supplement: s1 [file s1]

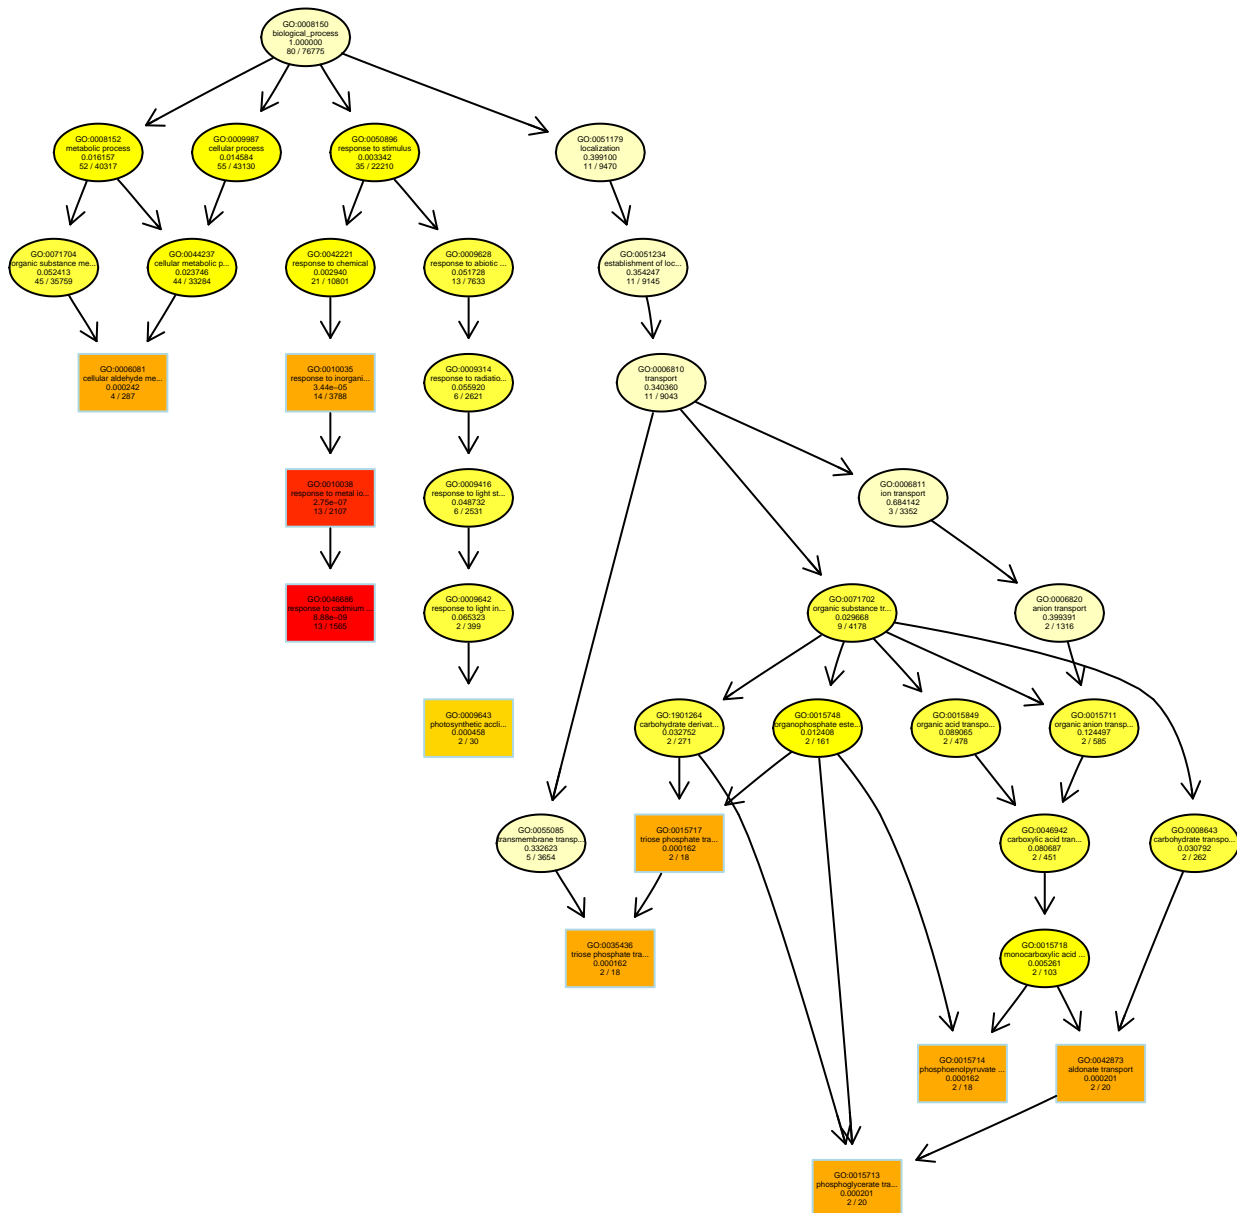

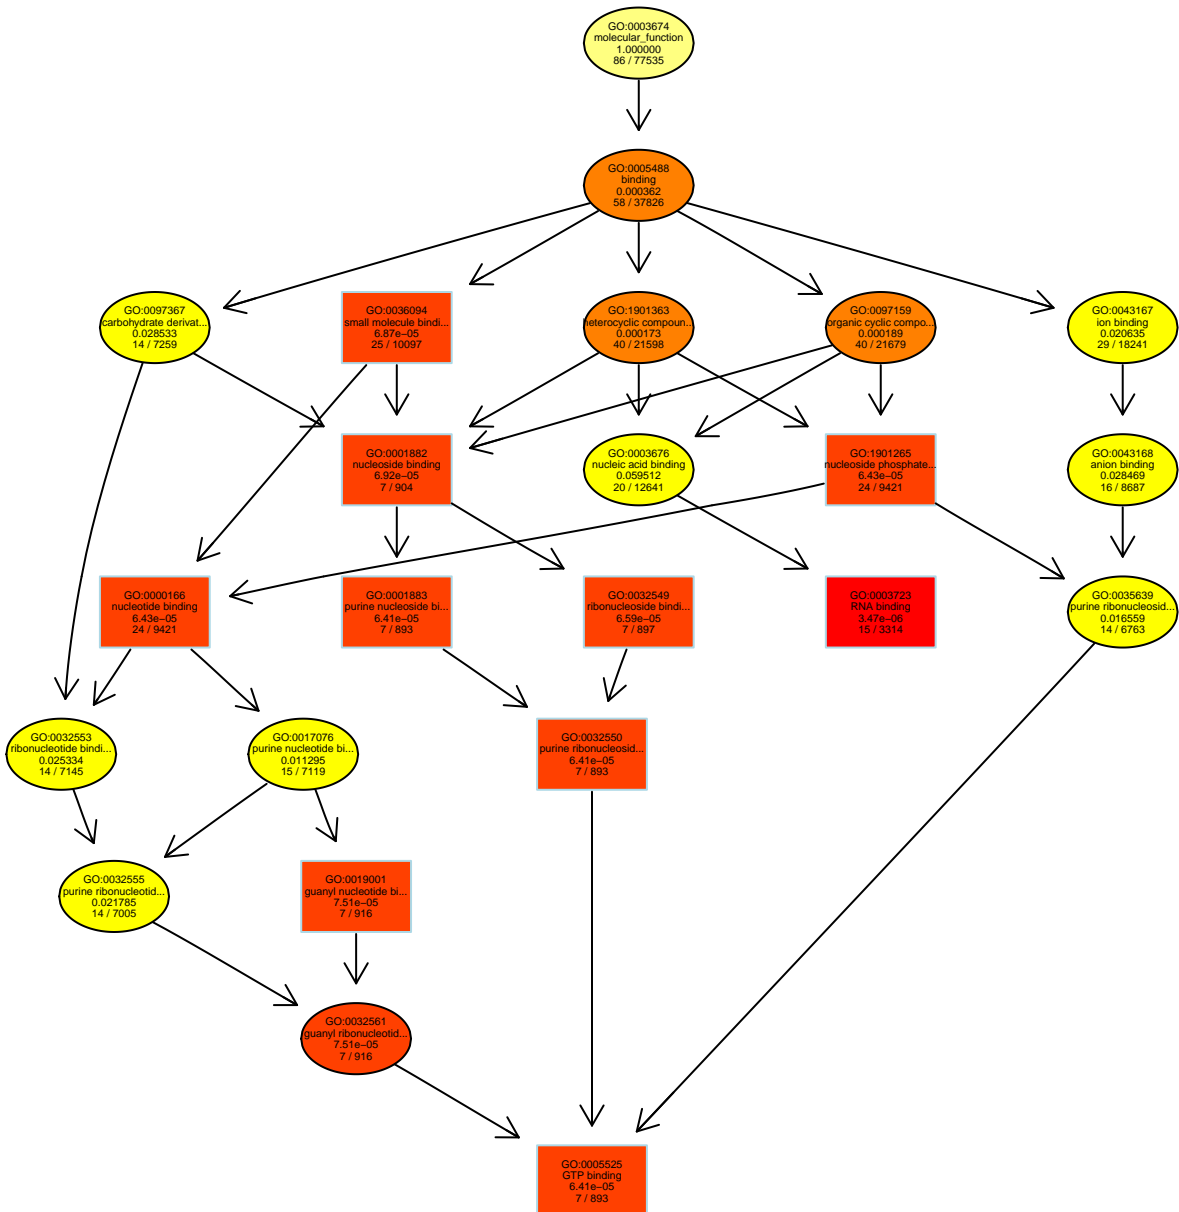

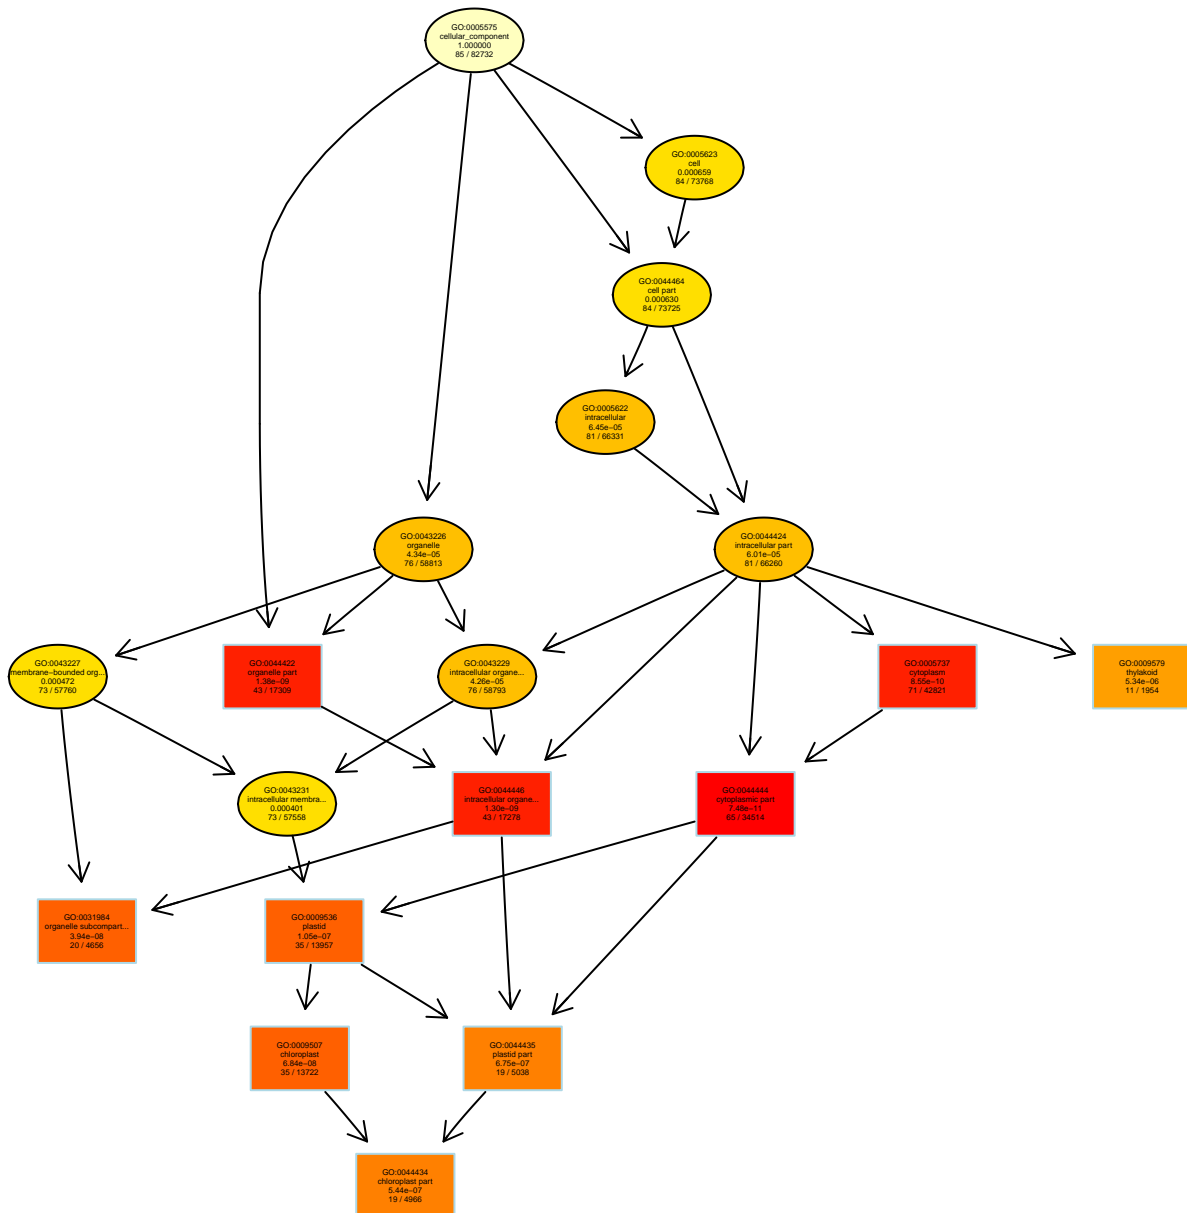

Supplement: s1 [file s1]

**Histogram of pvalFis.BP**

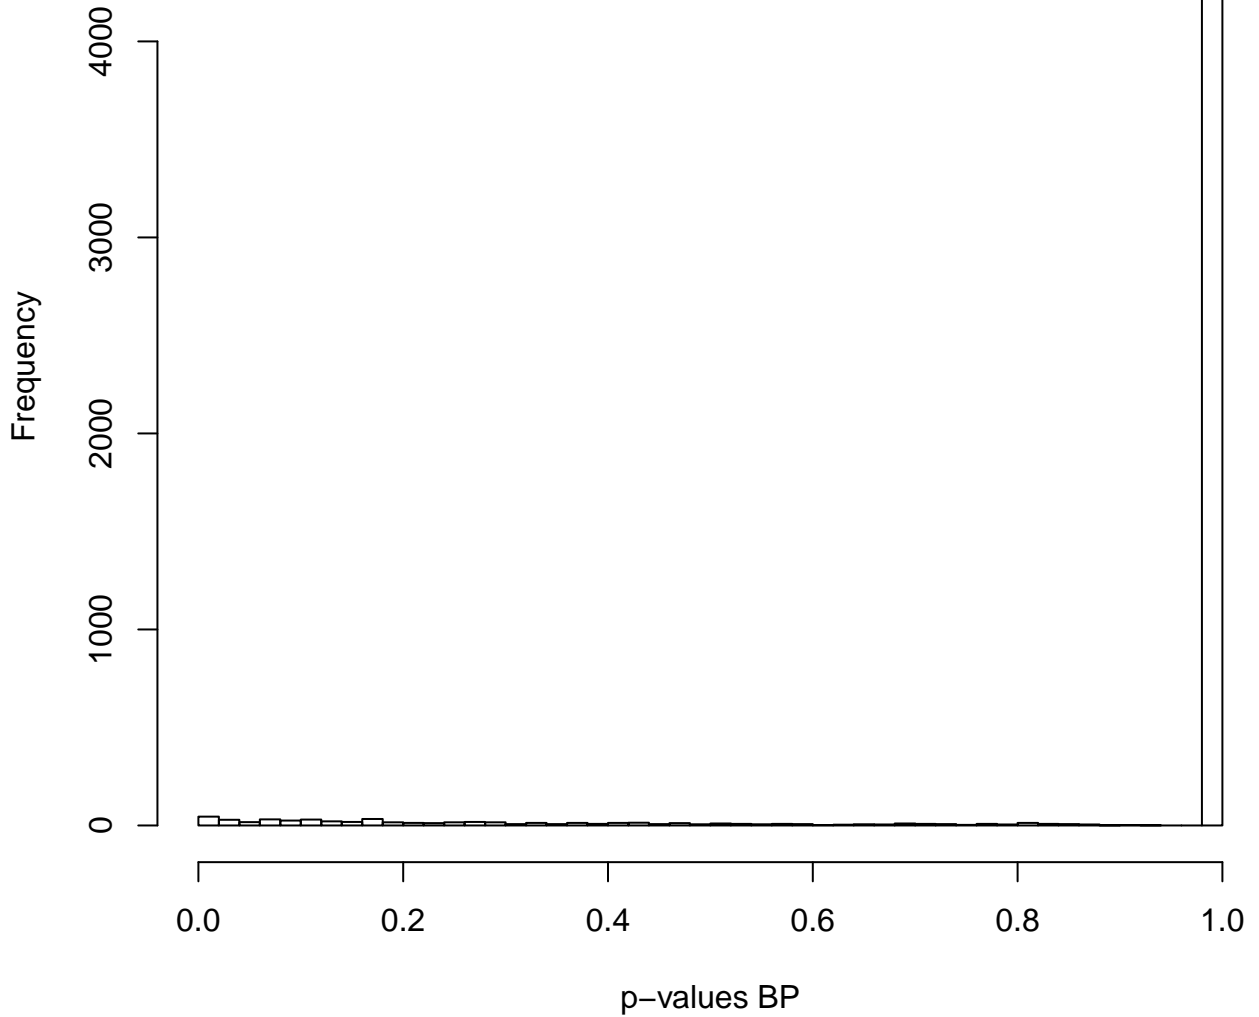

**Histogram of pvalFis.MF**

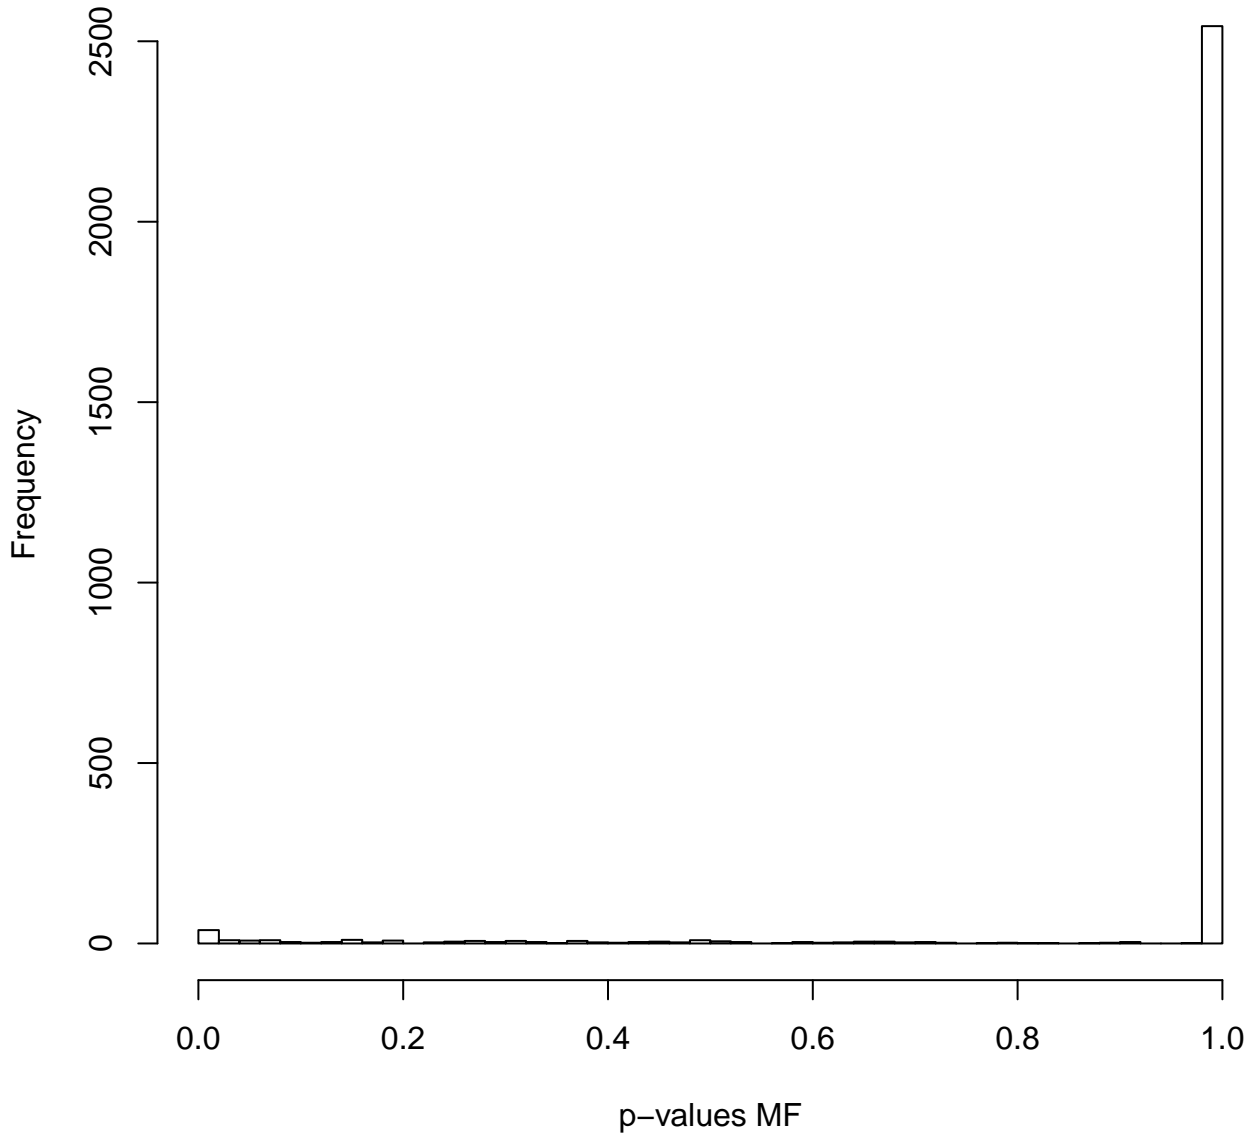

**Histogram of pvalFis.CC**

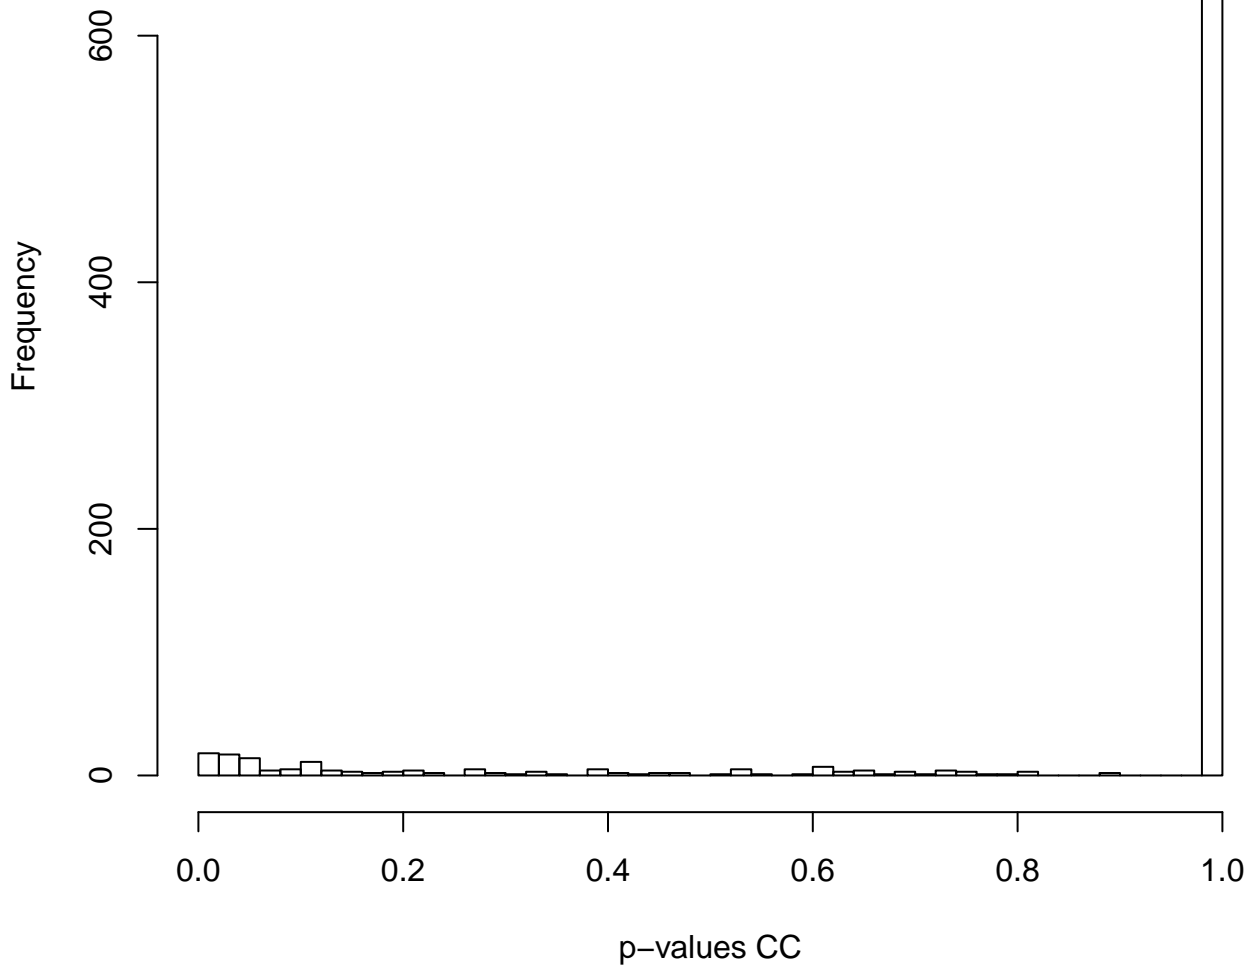

Supplement: s1 [file s1]

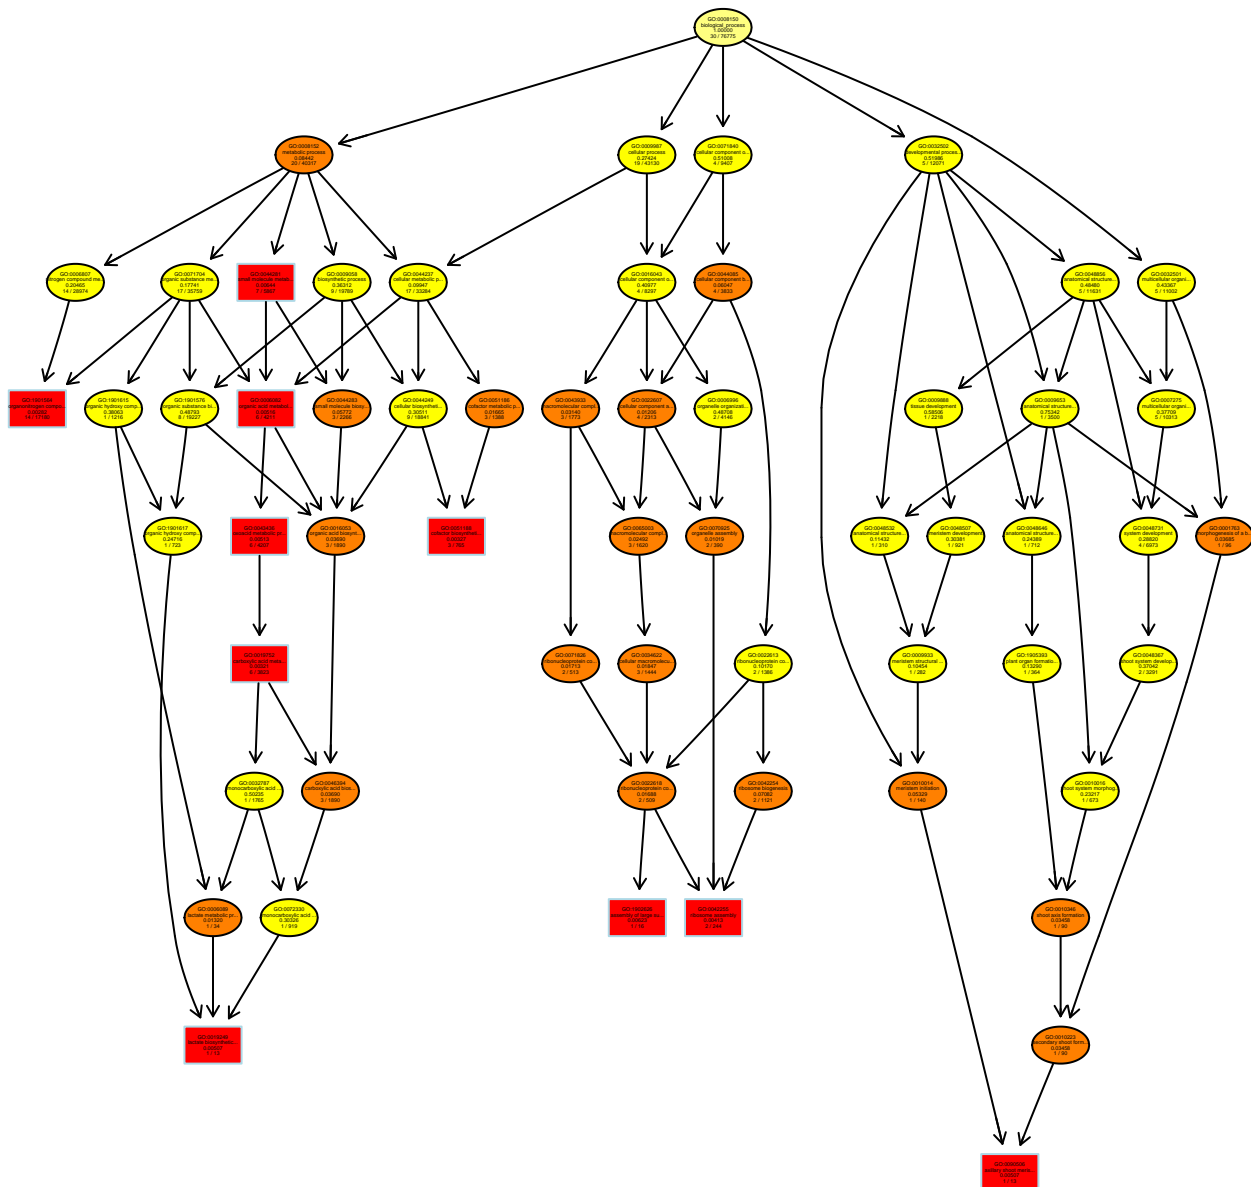

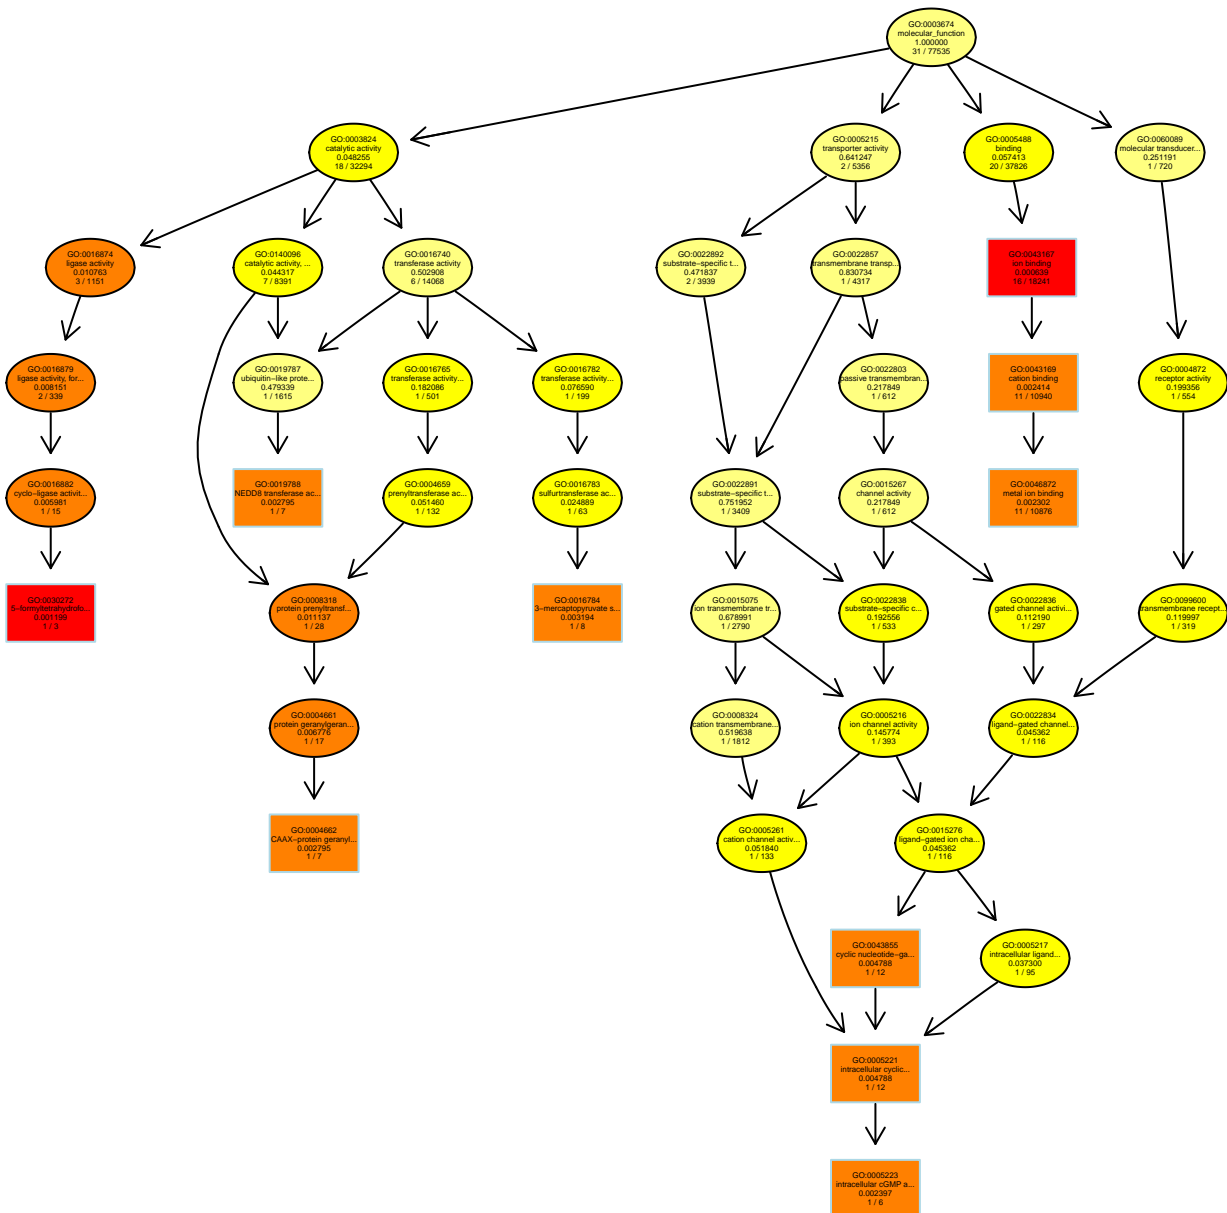

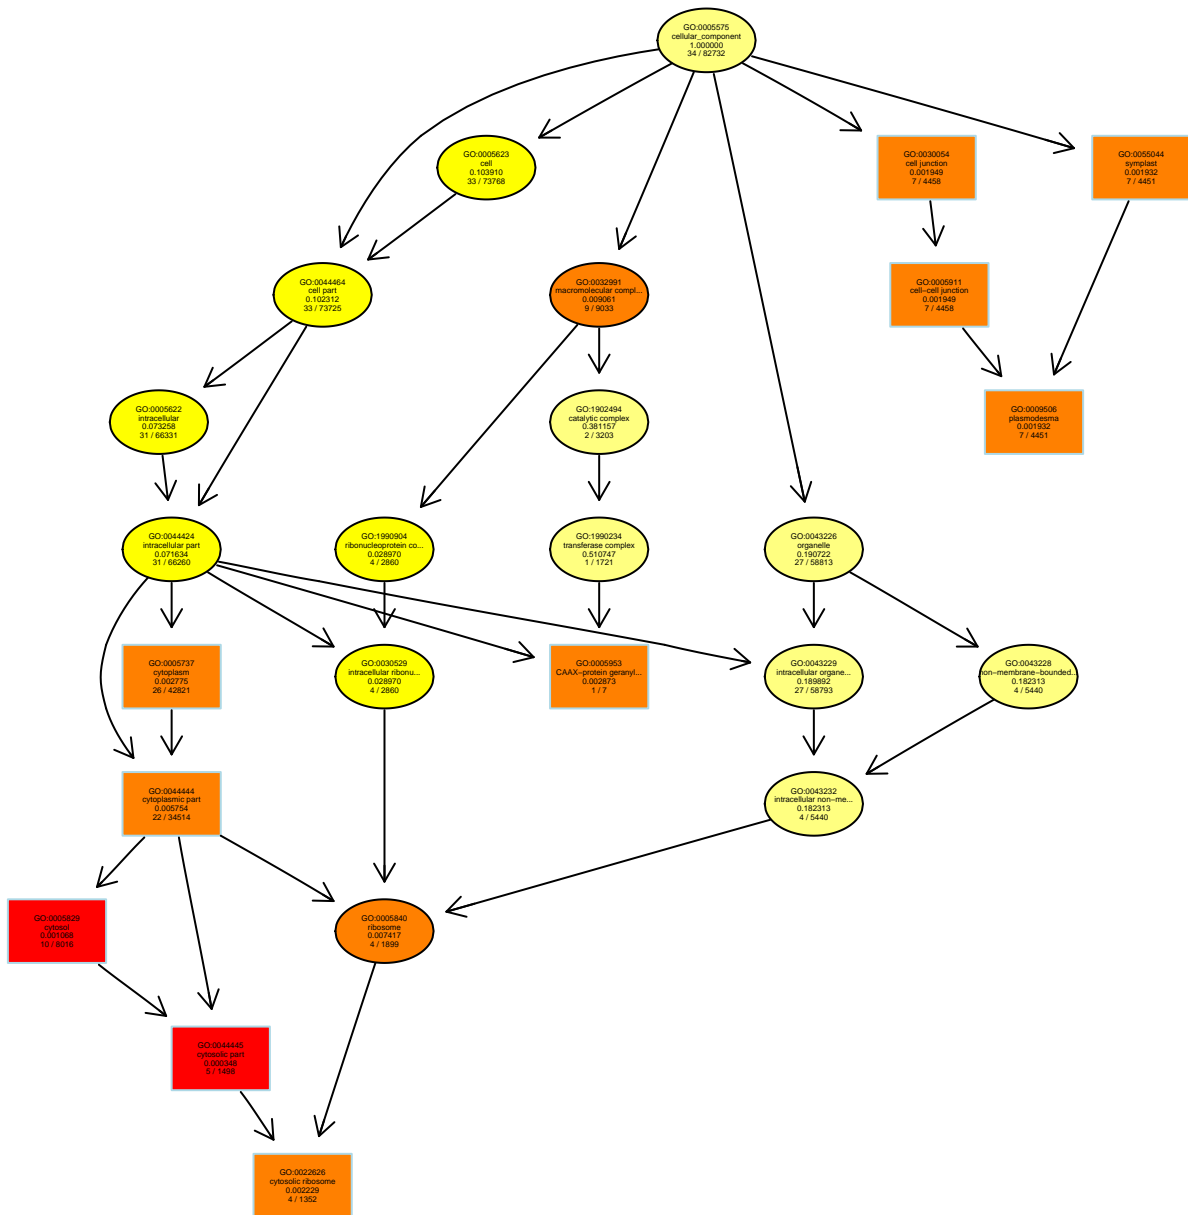

Supplement: s1 [file s1]

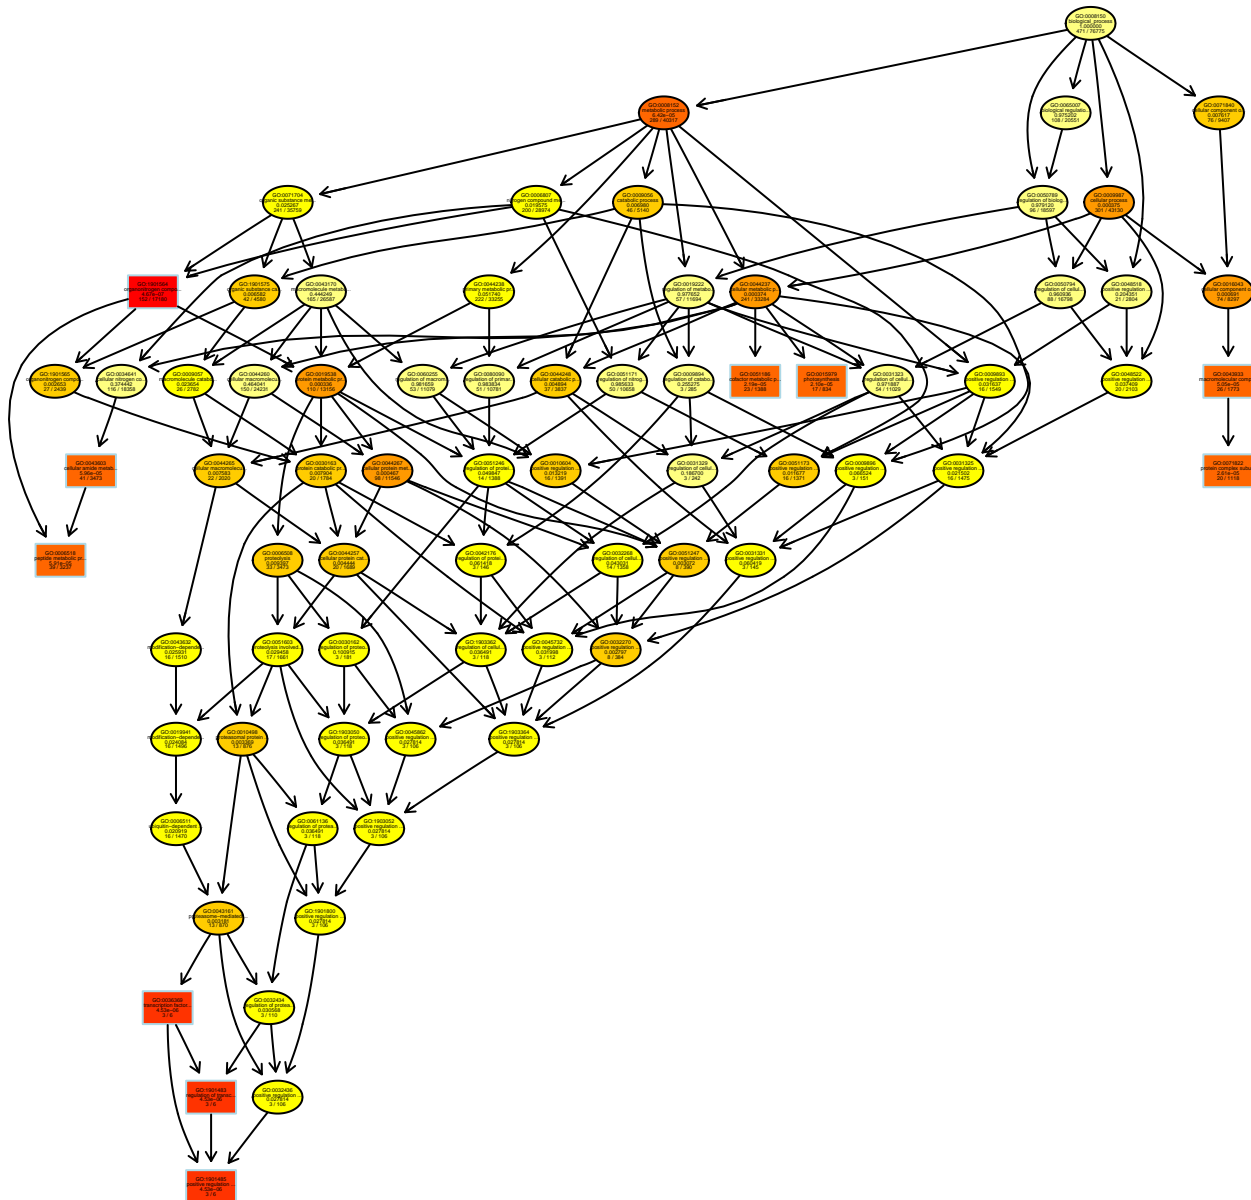

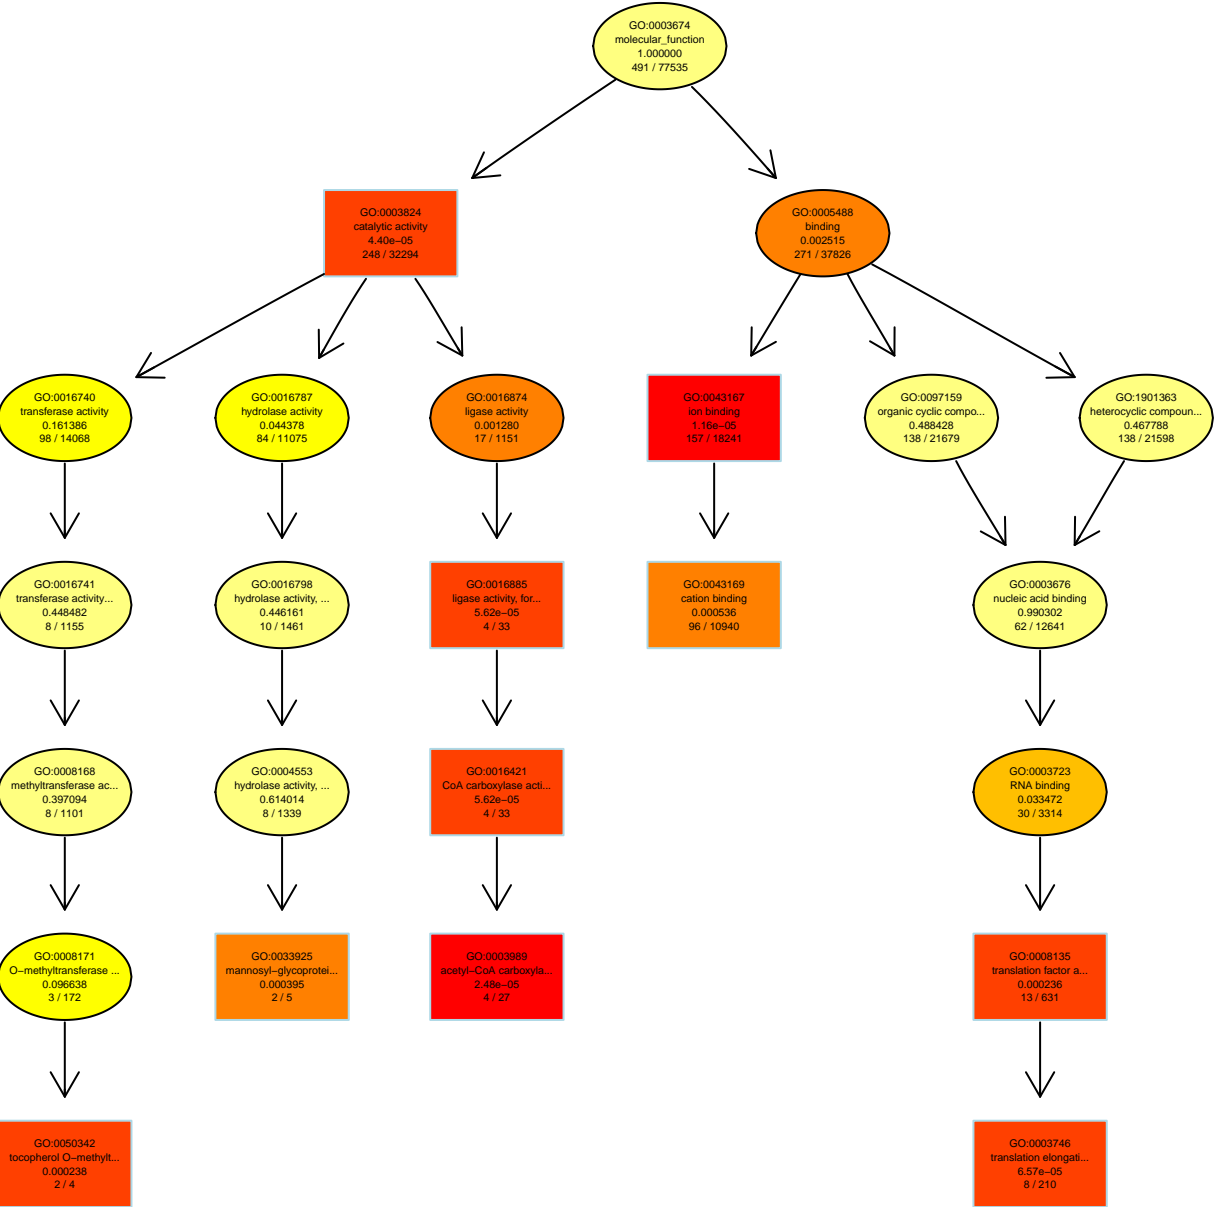

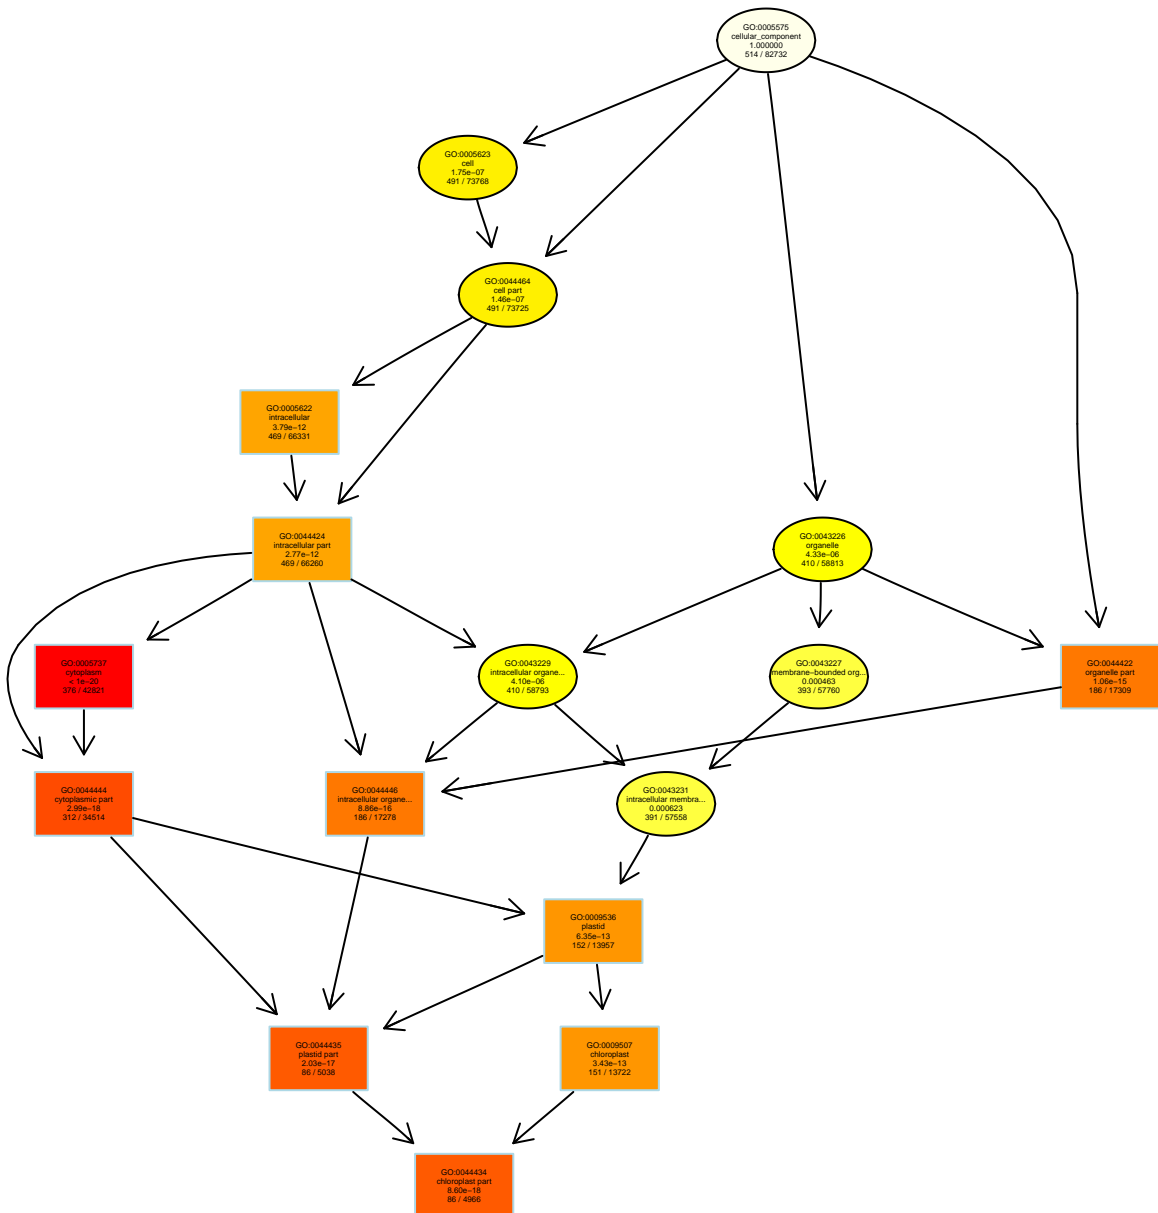

Supplement: s1 [file s1]

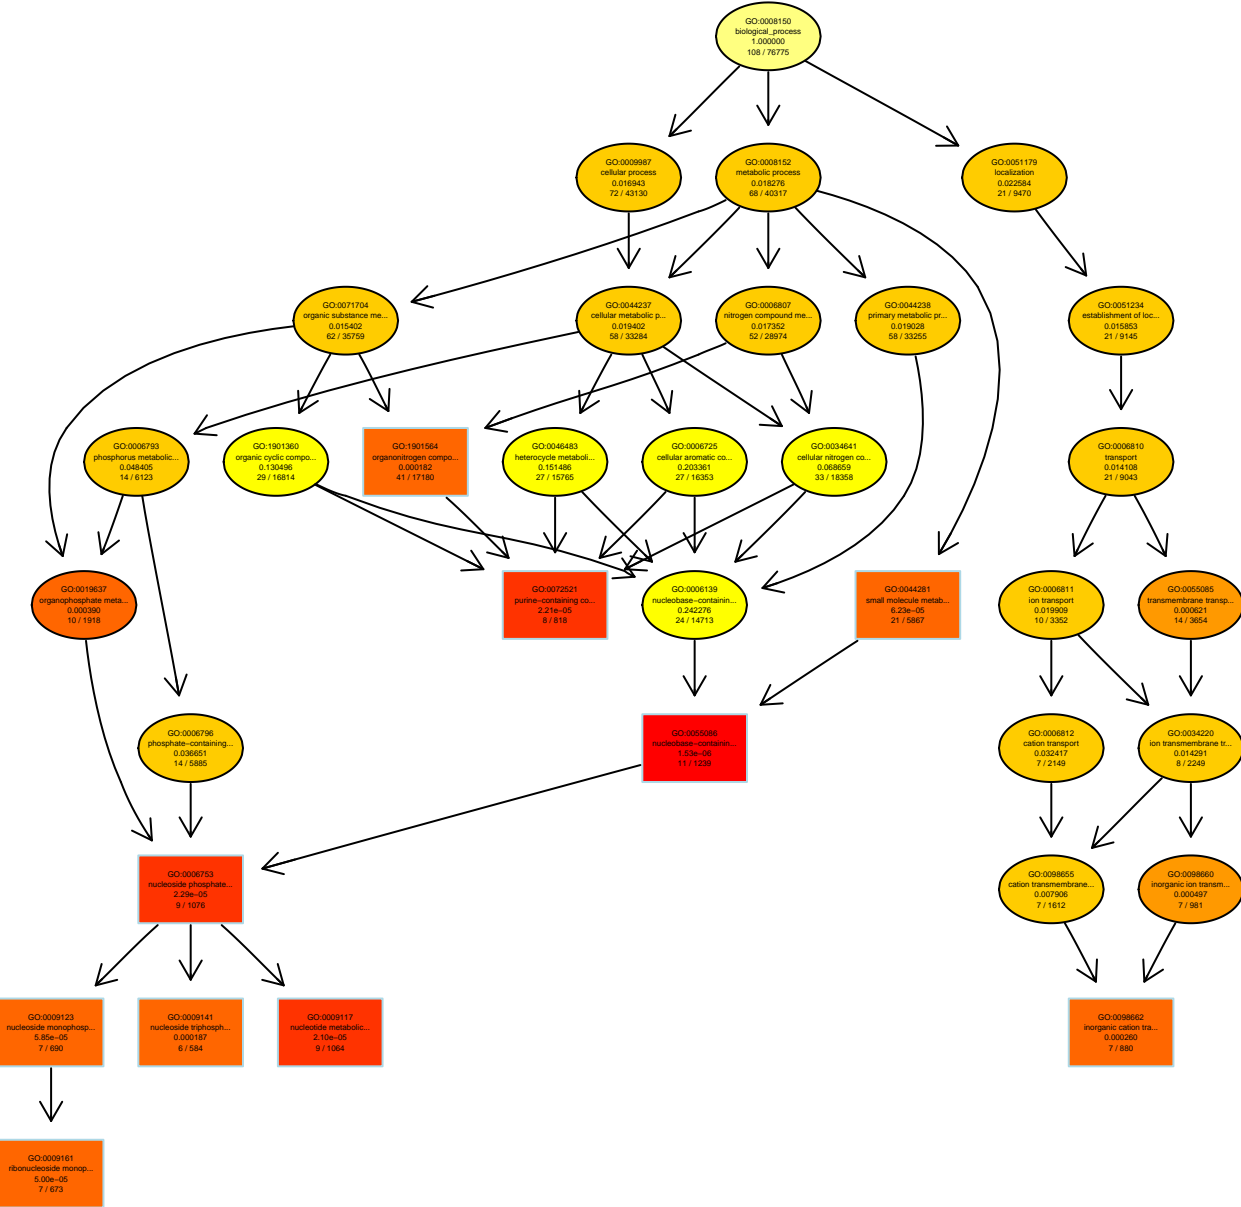

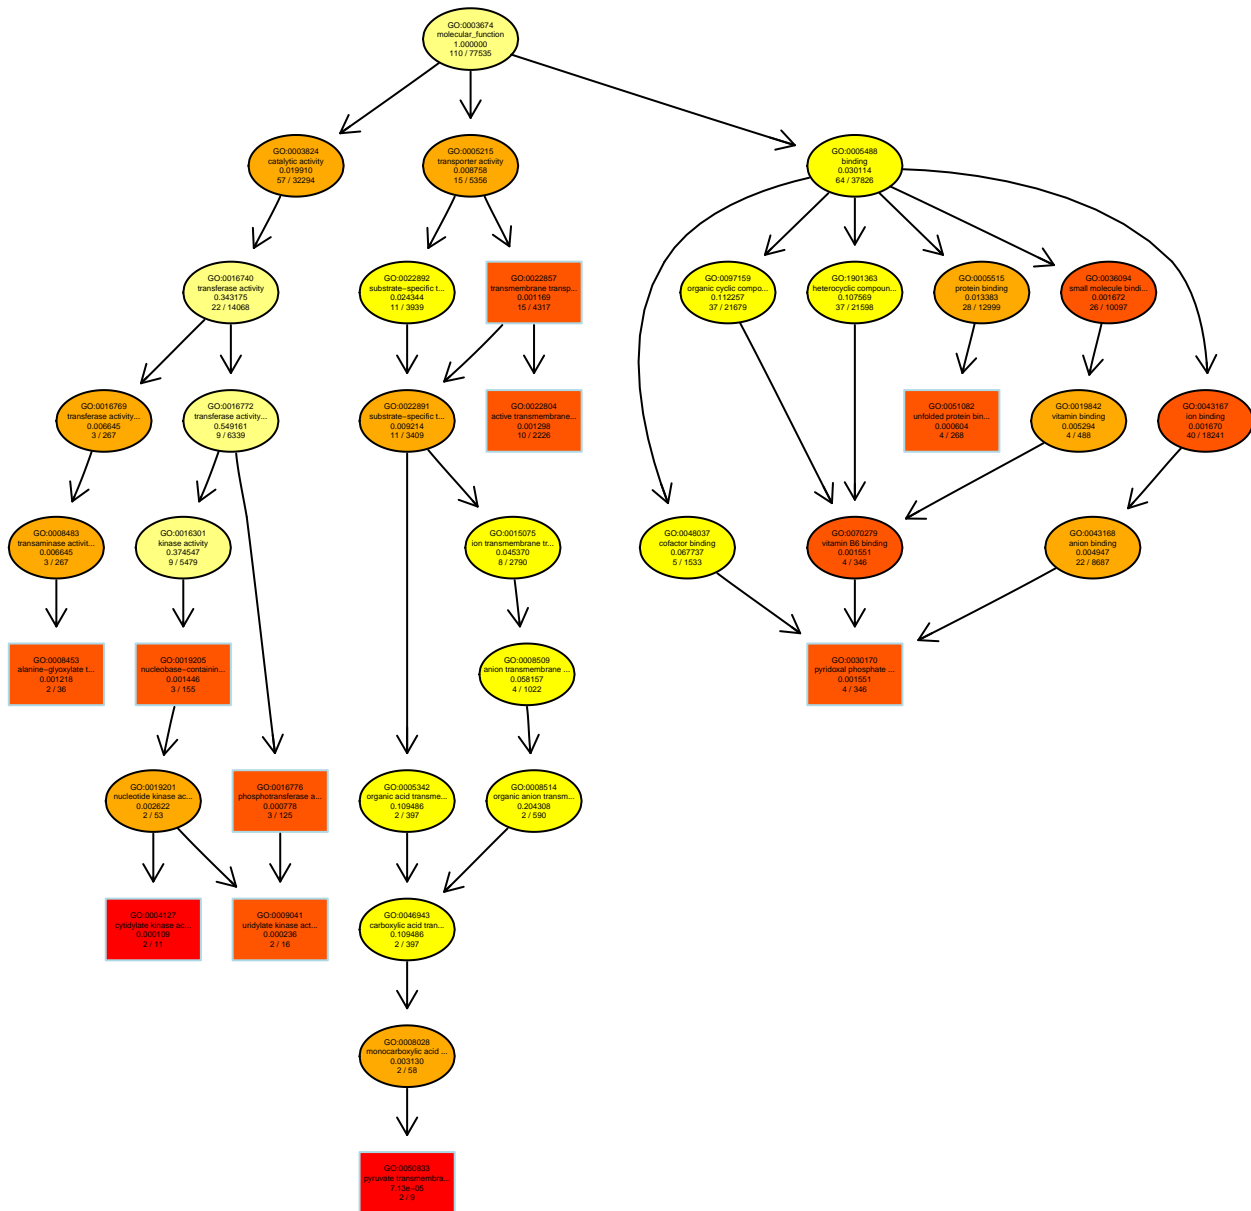

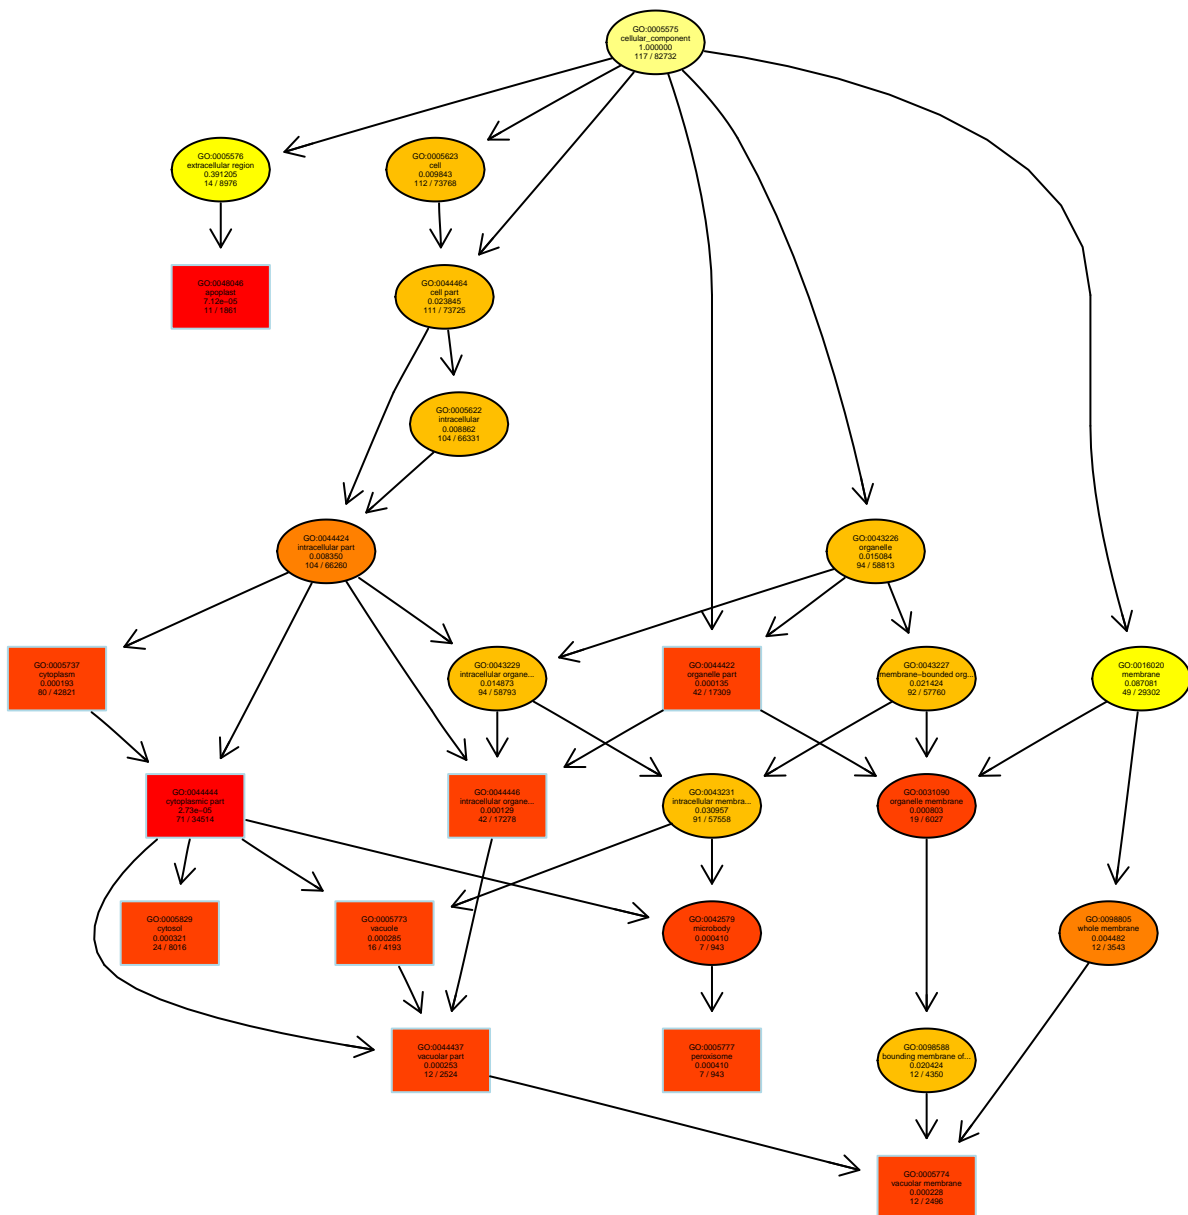

Supplement: s1 [file s1]

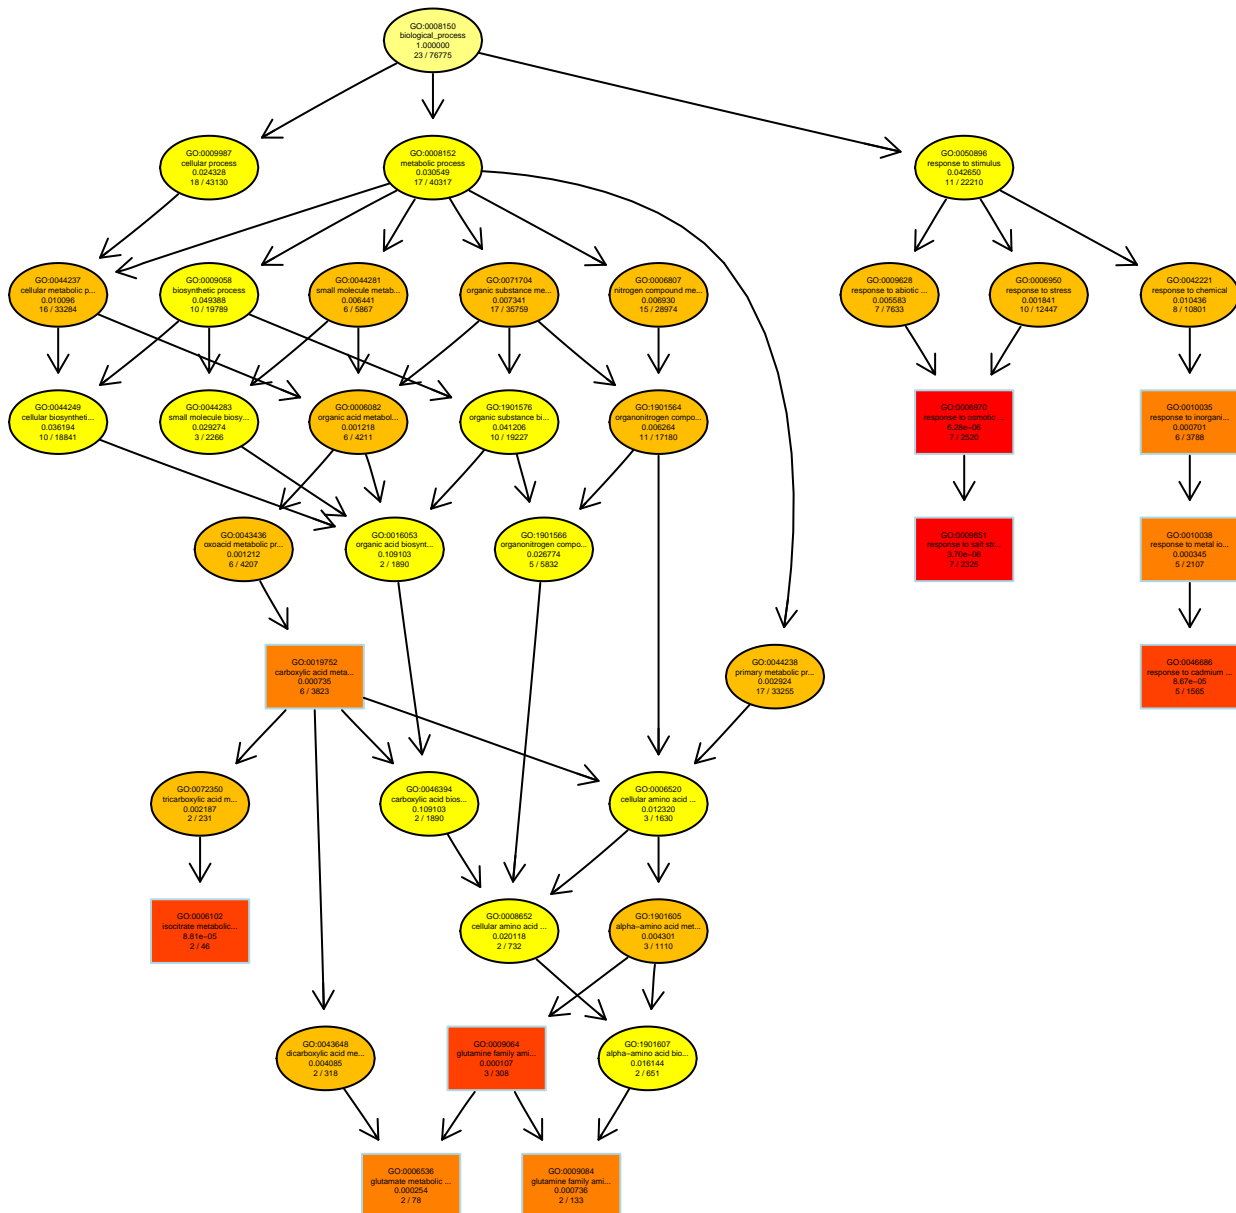

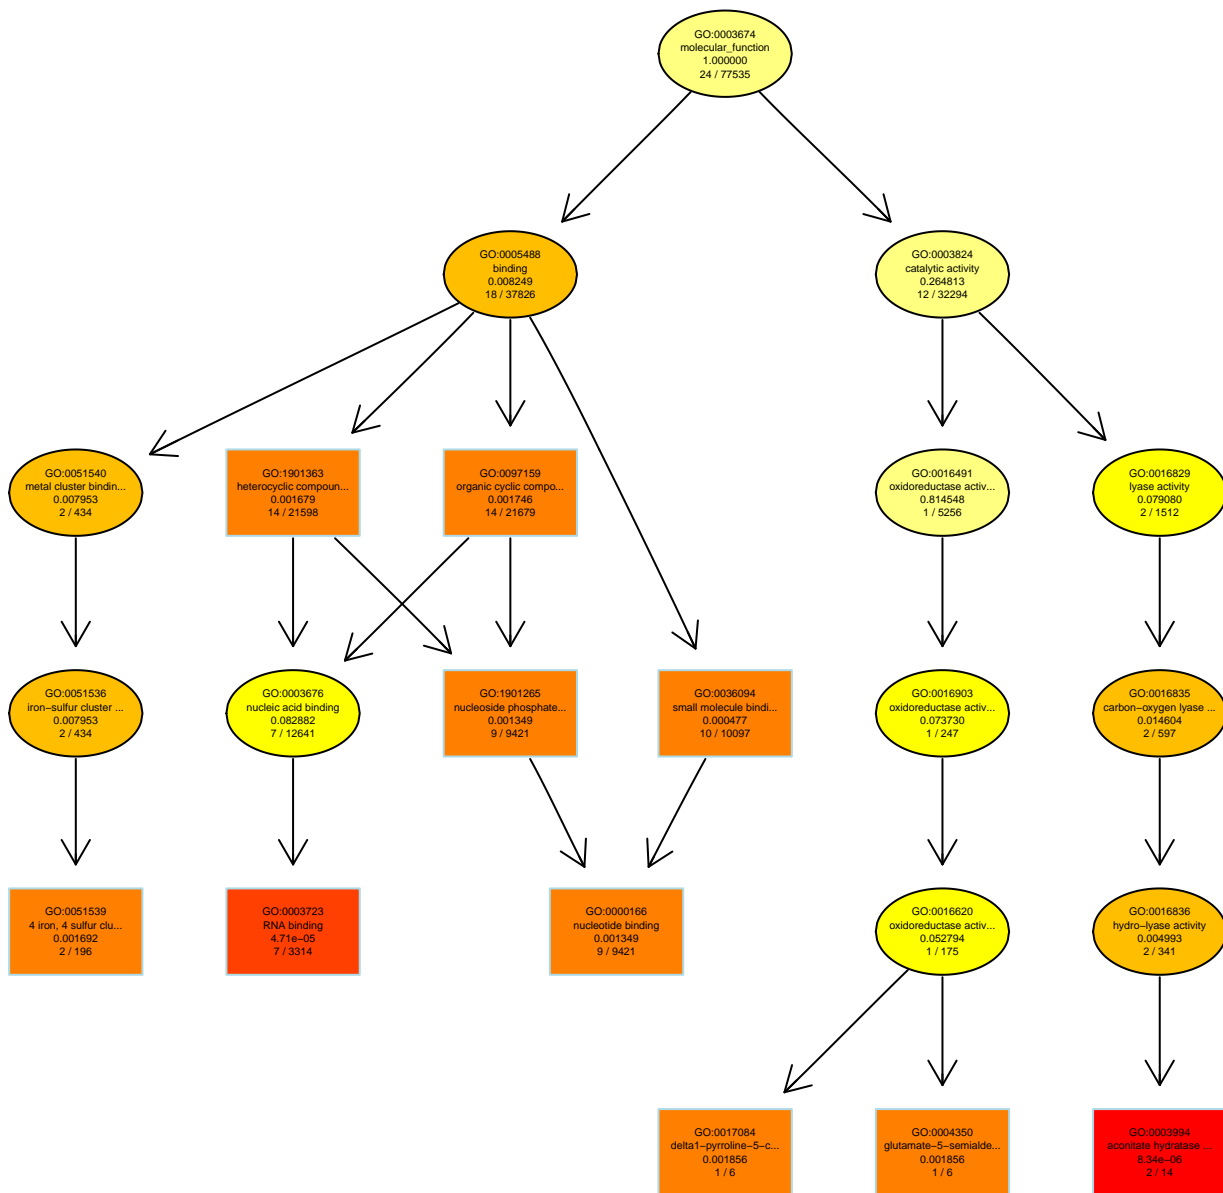

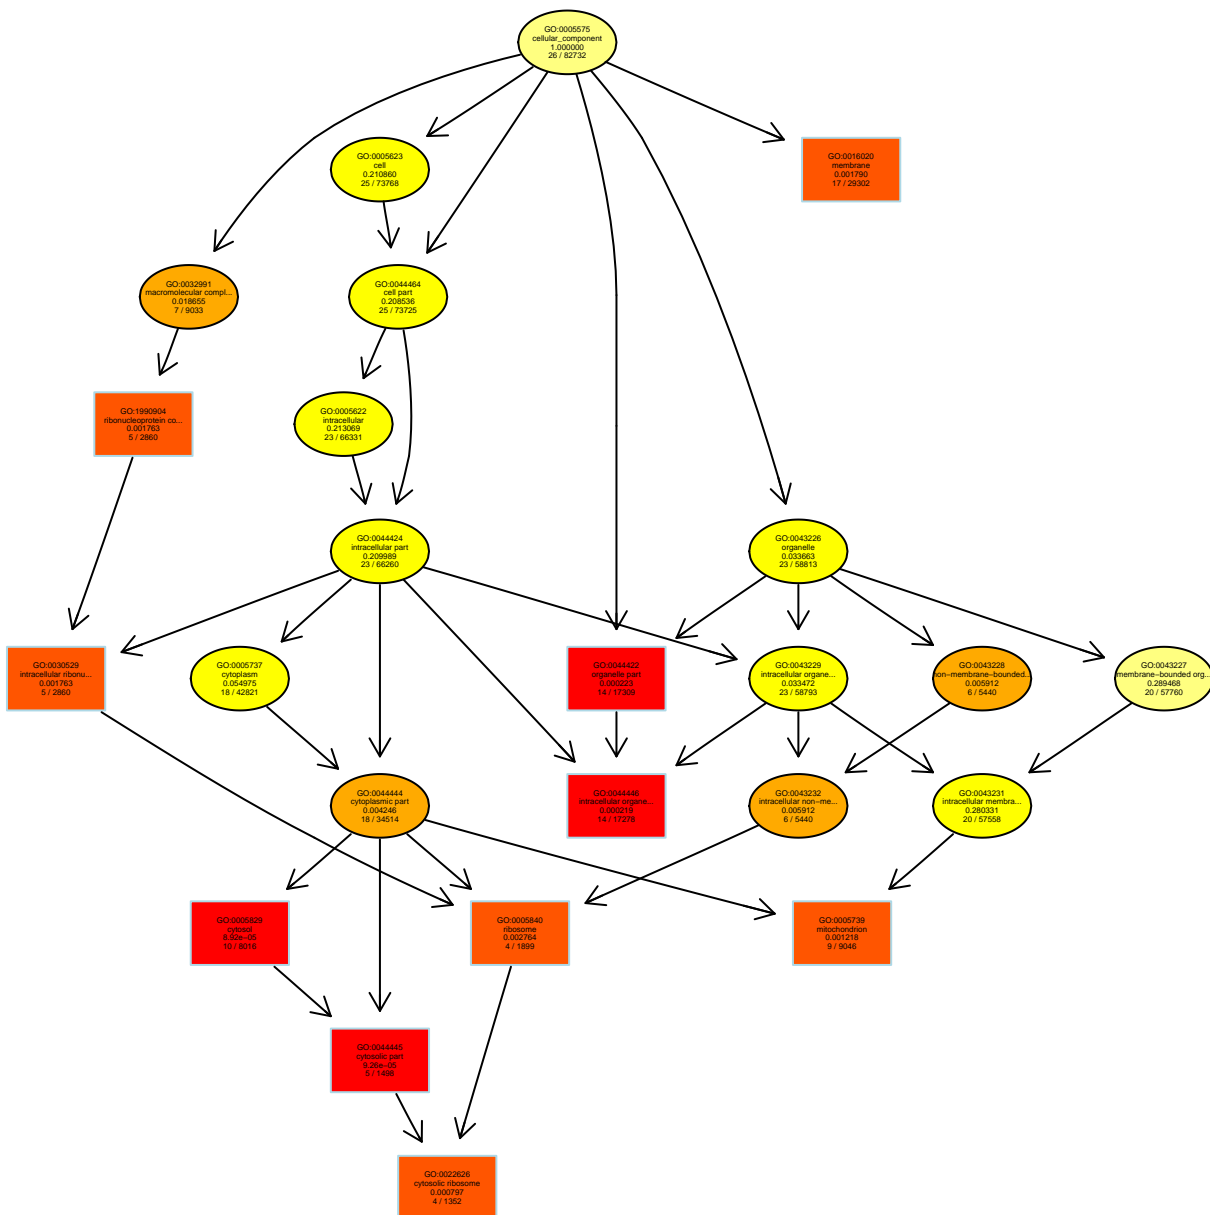

Supplement: s1 [file s1]

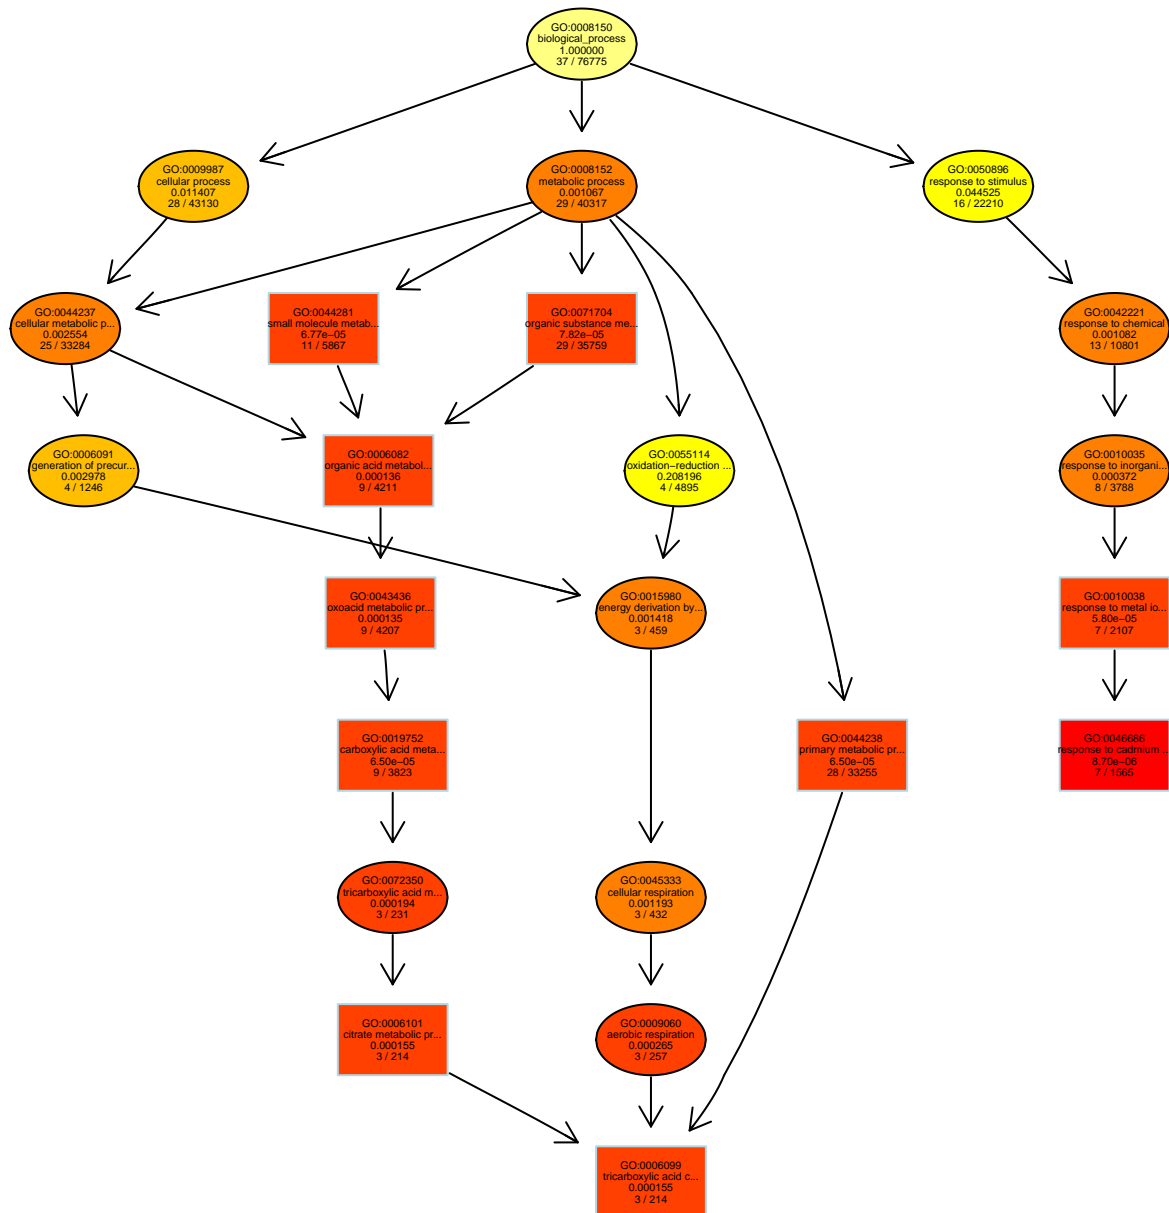

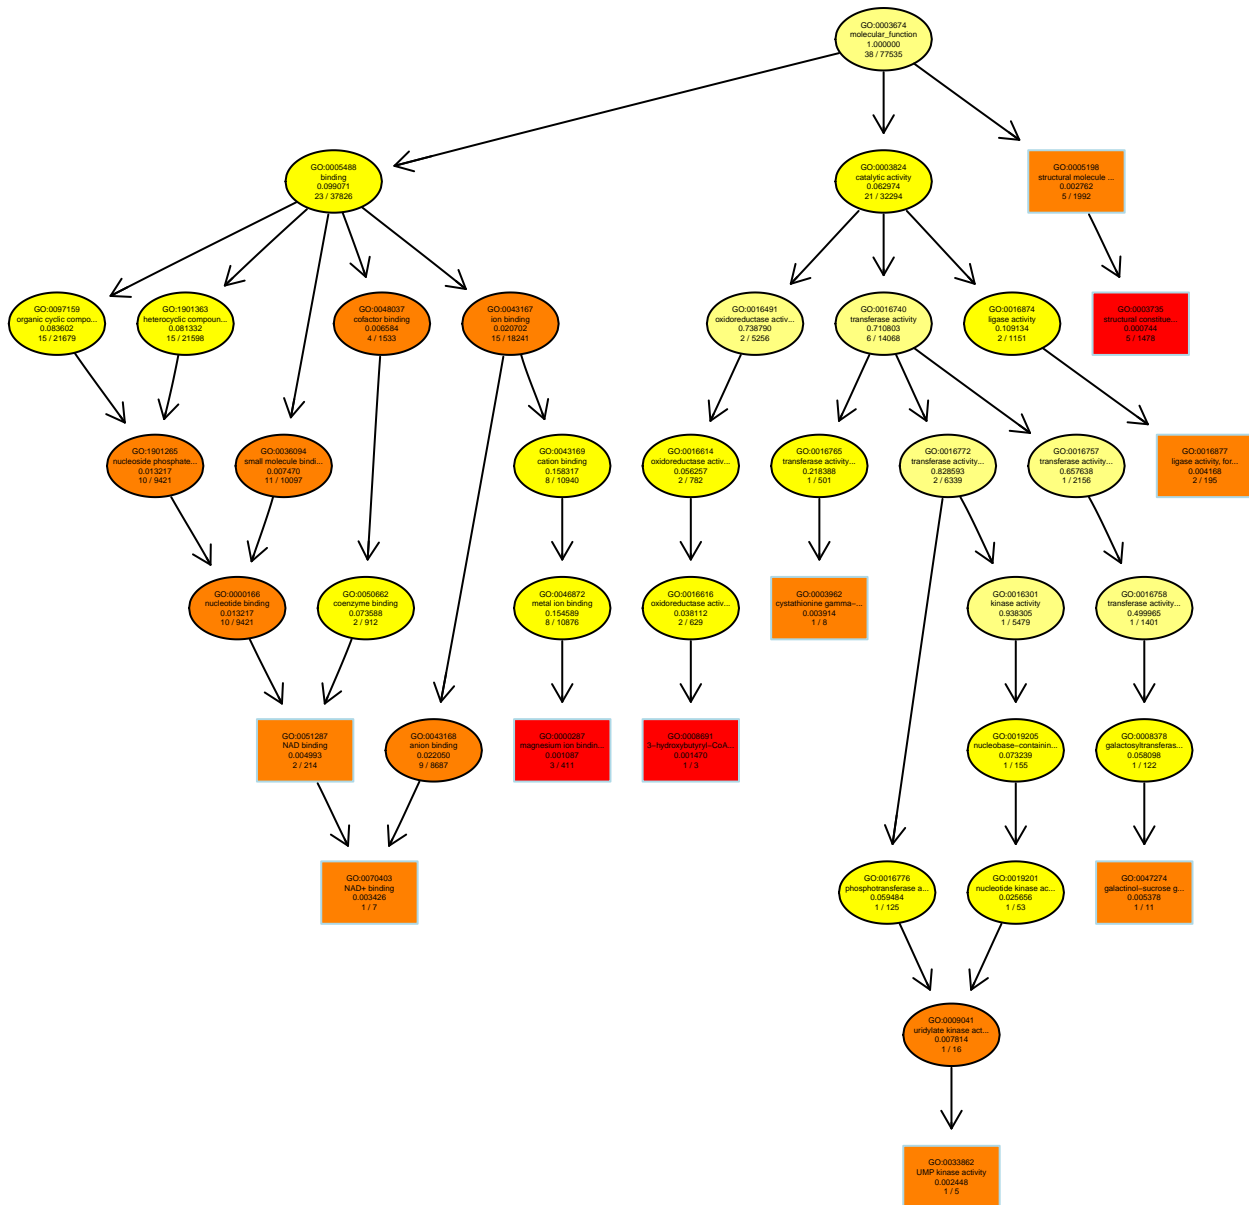

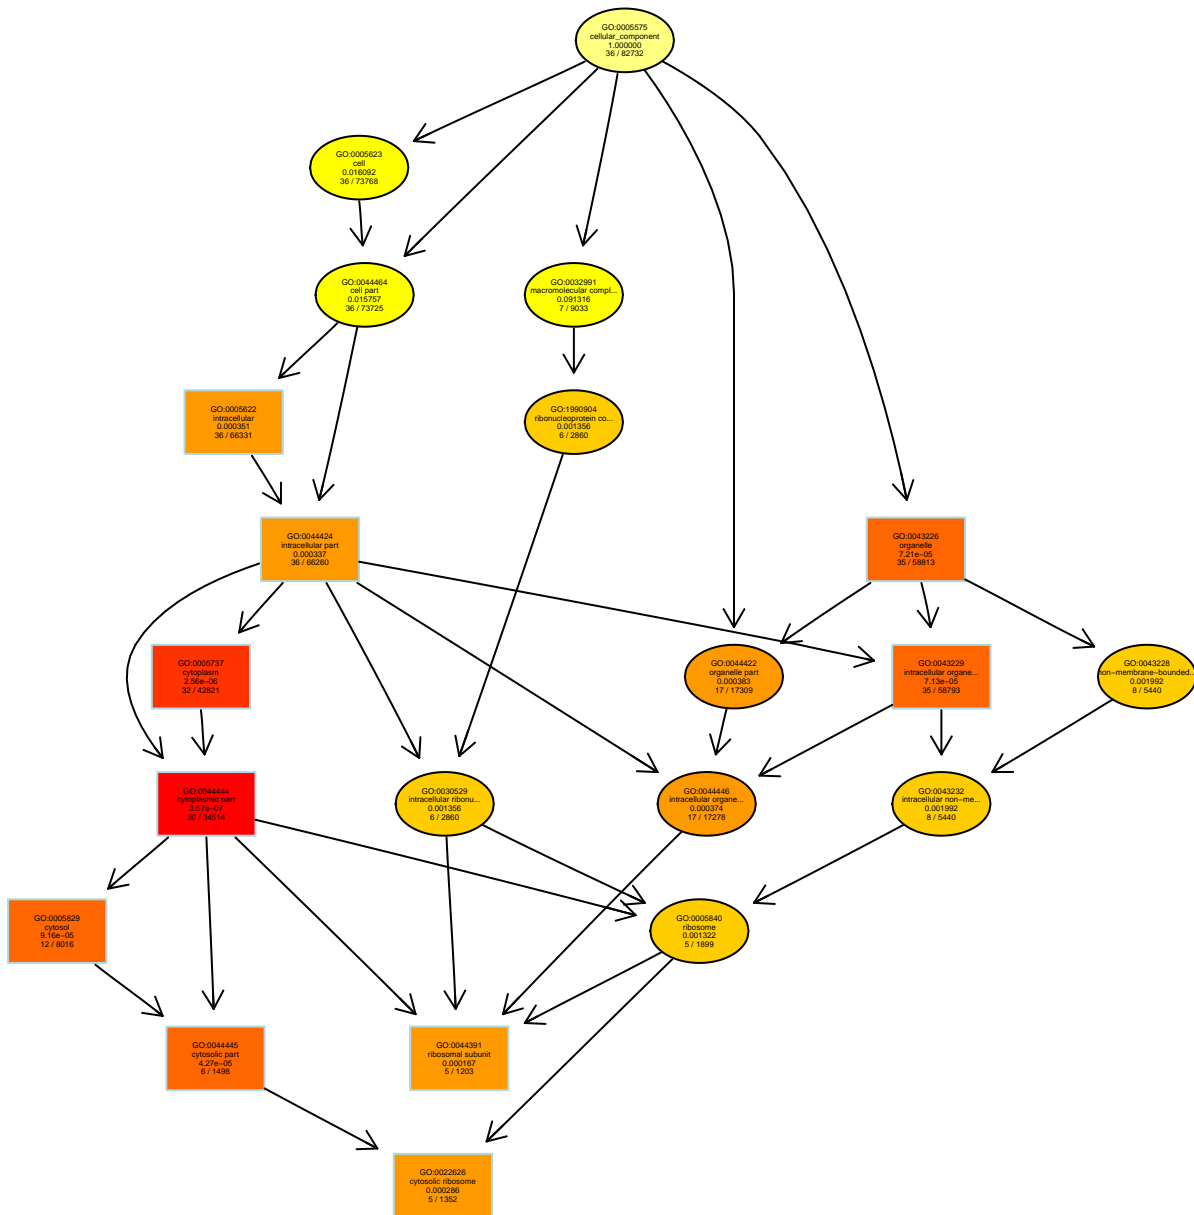

Supplement: s1 [file s1]

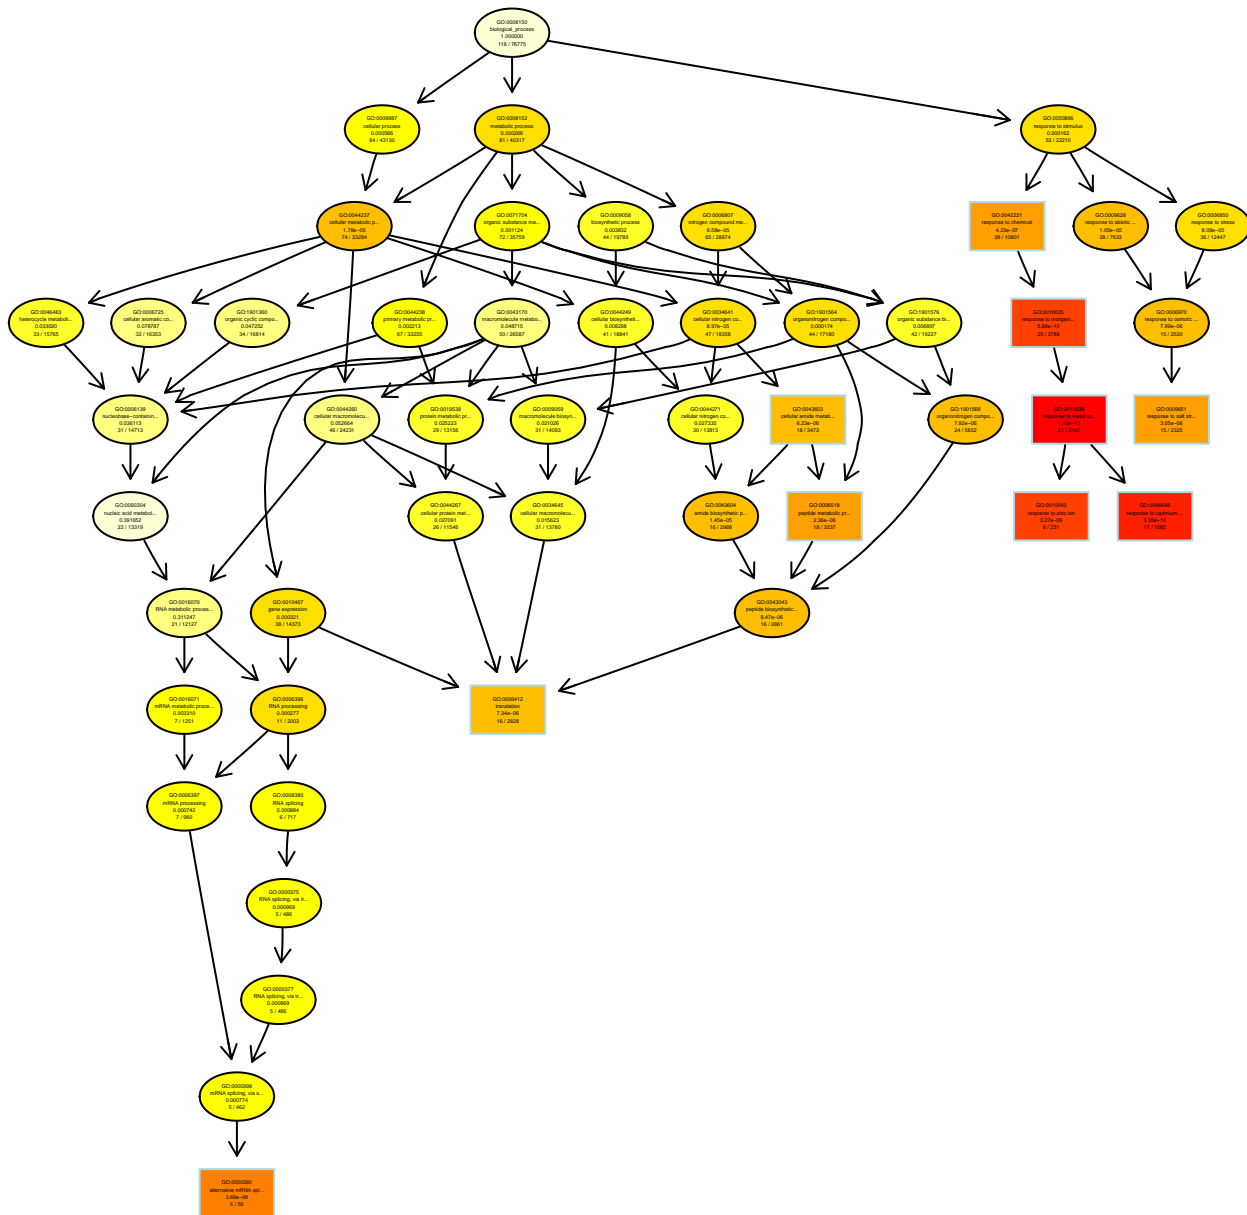

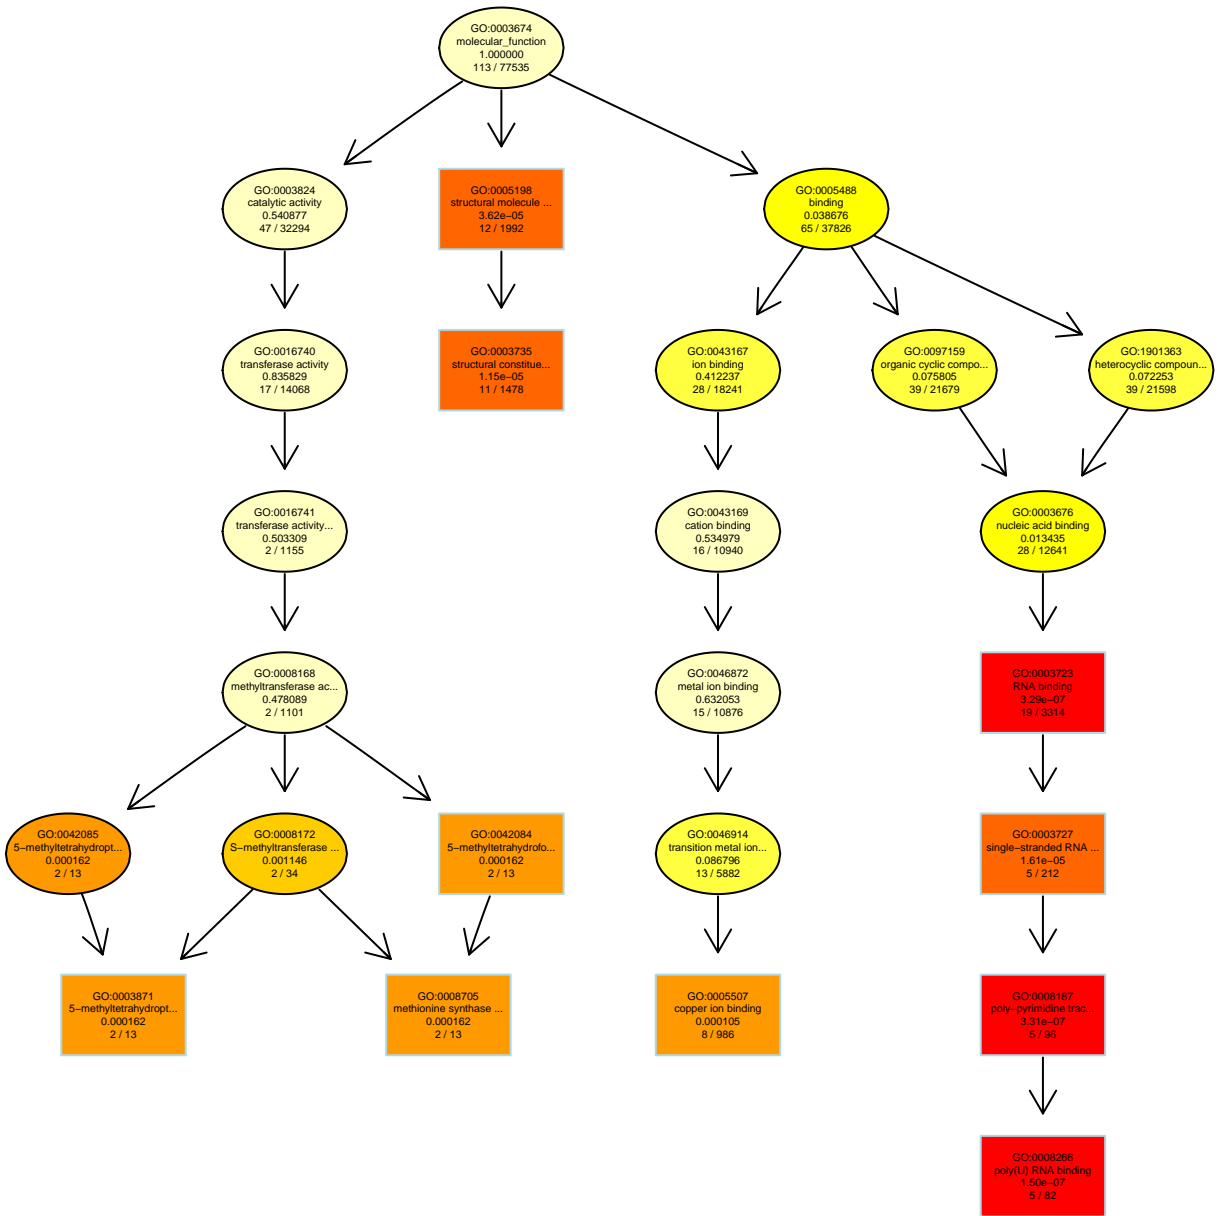

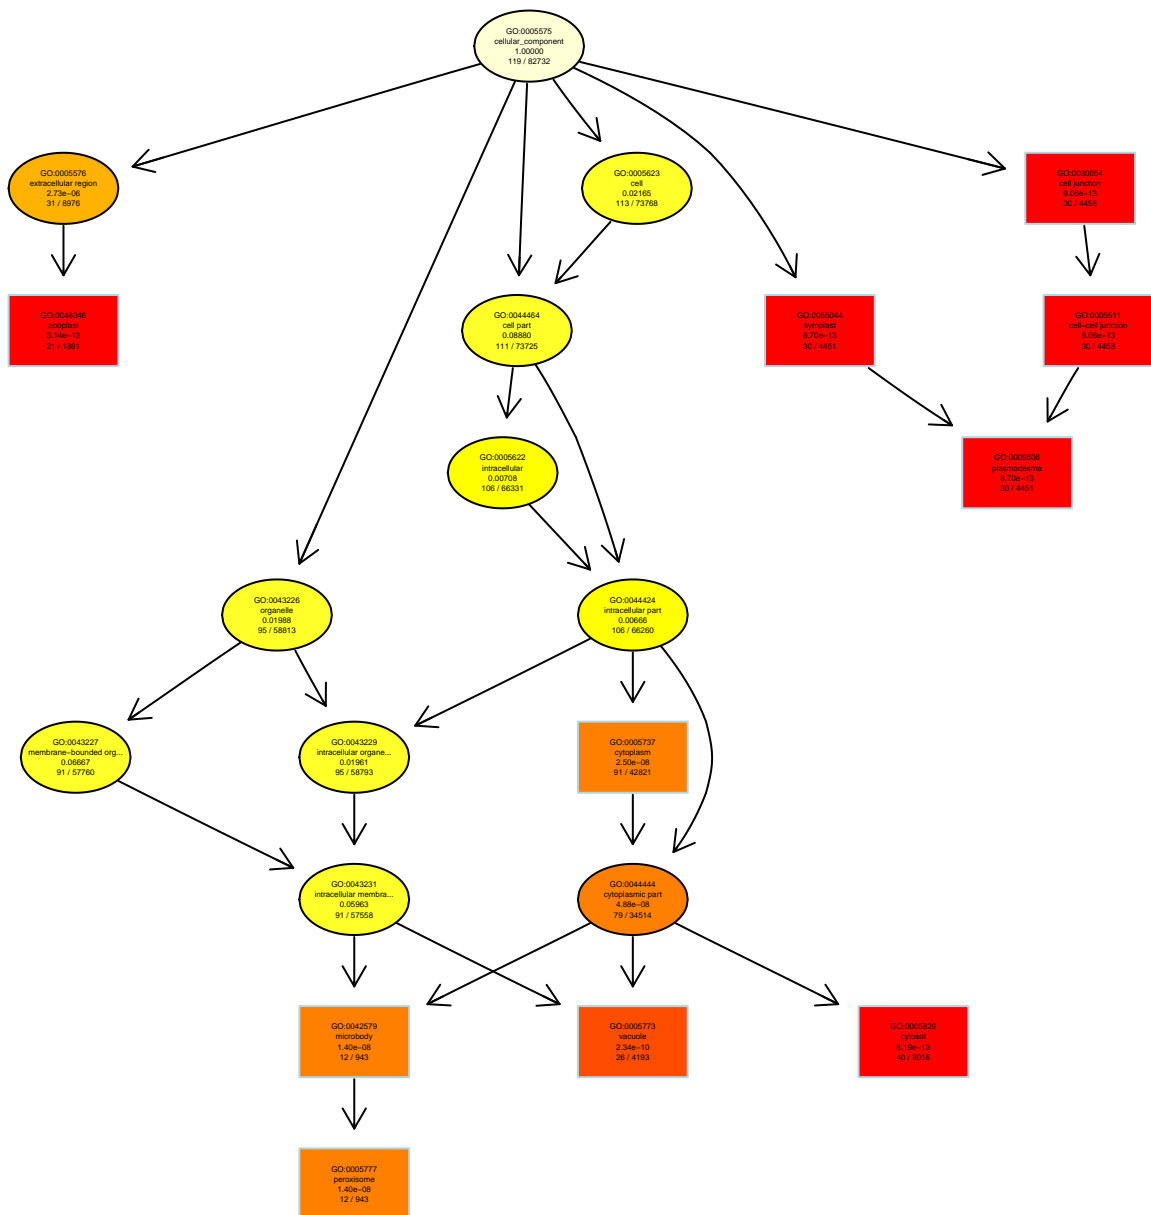

Supplement: s1 [file s1]

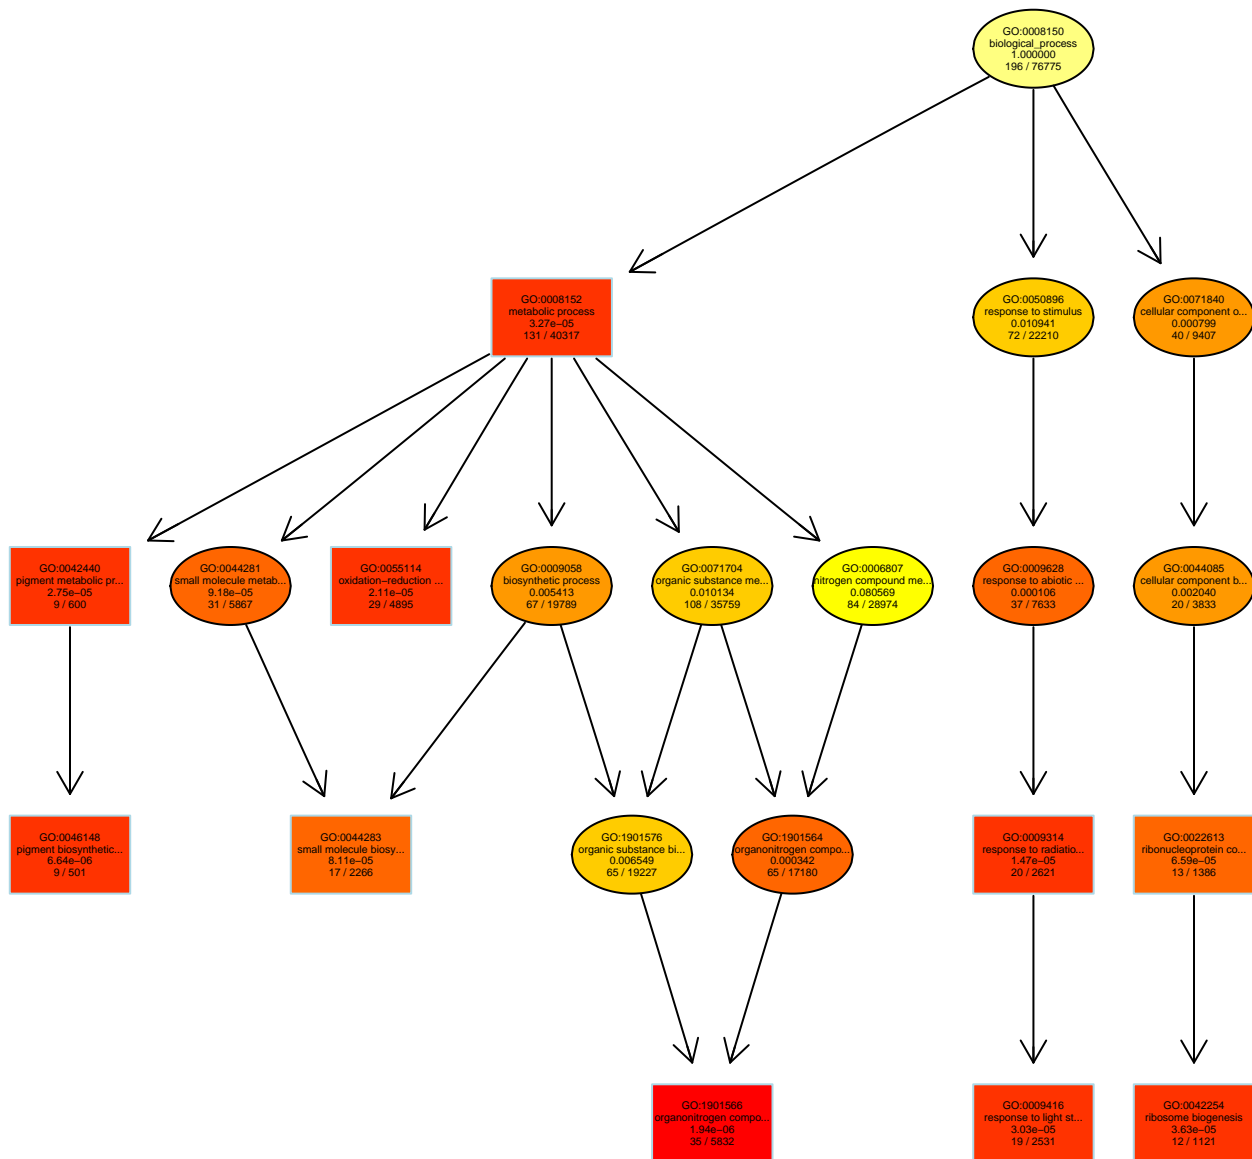

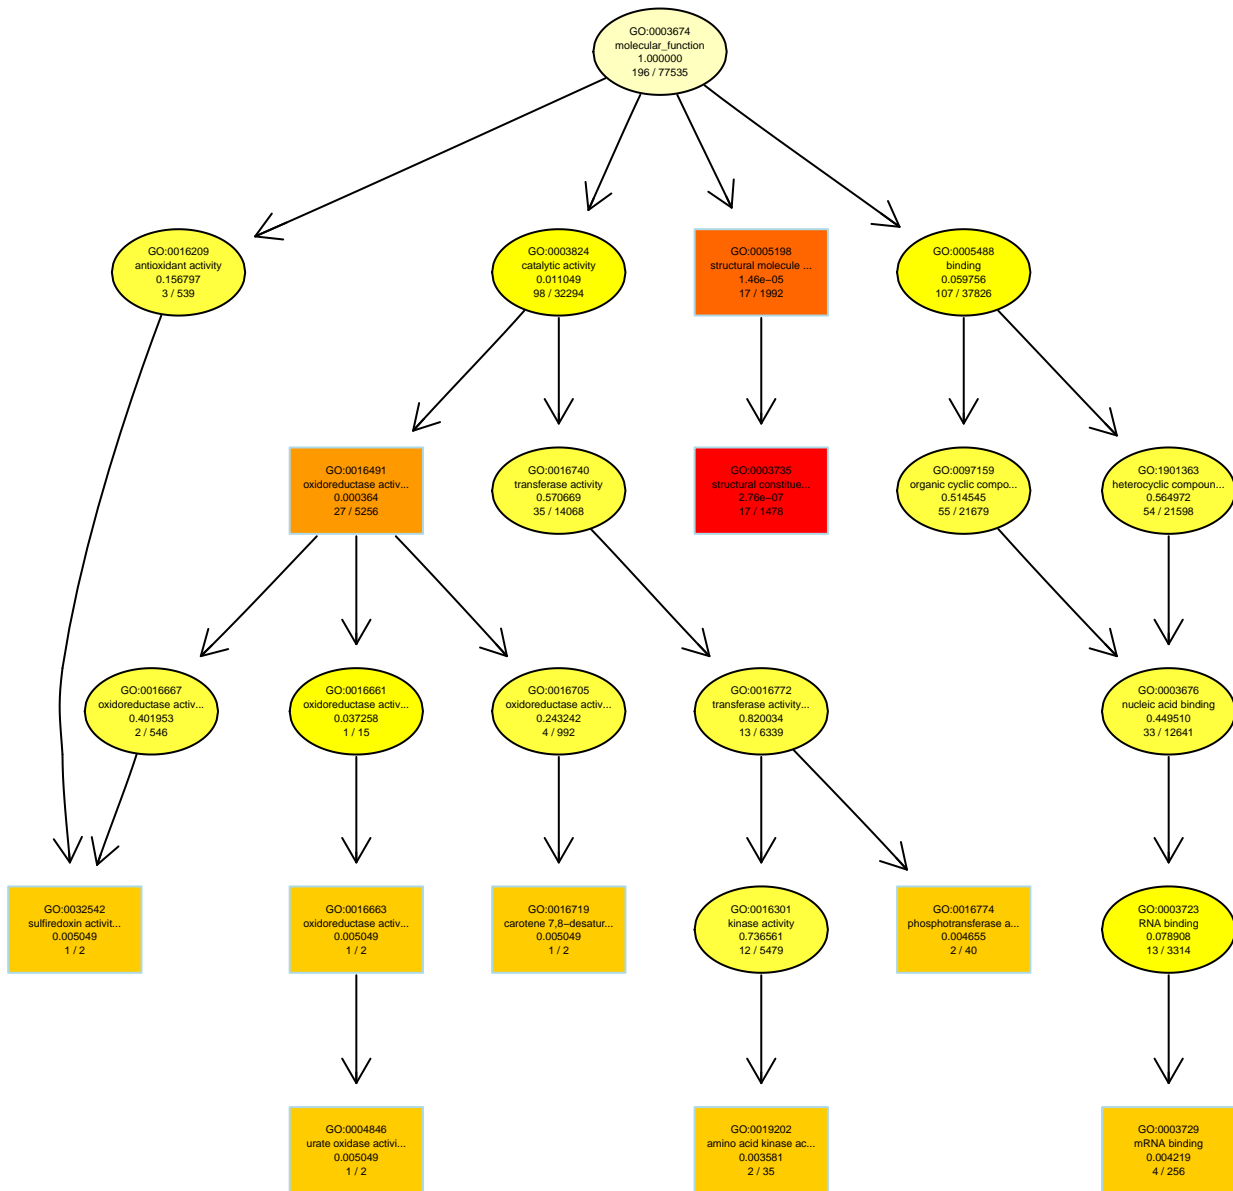

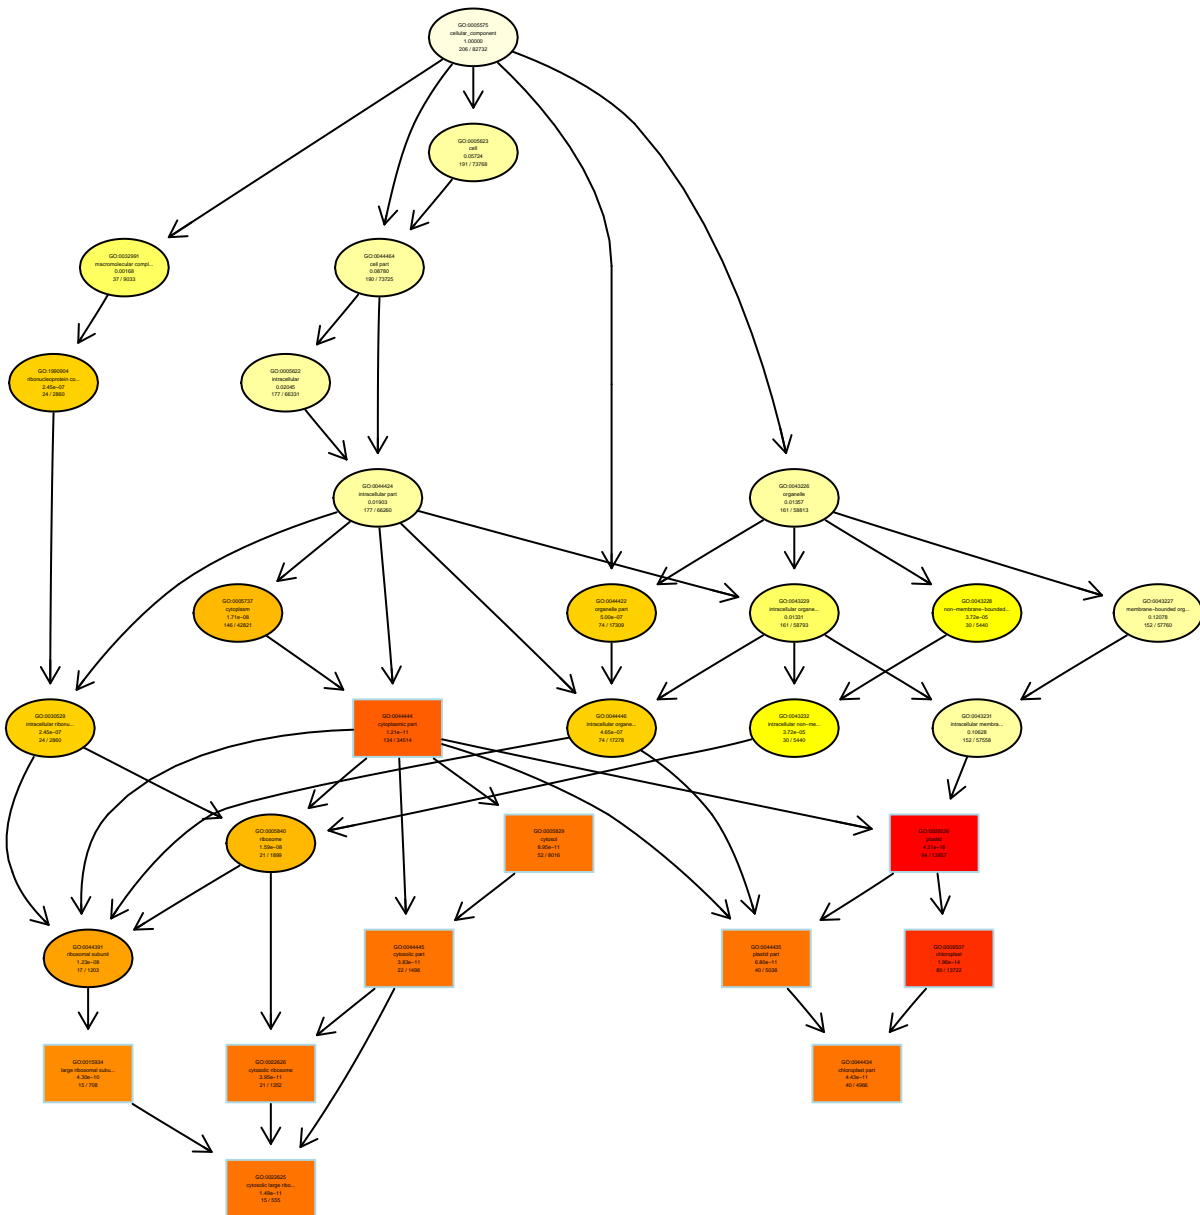

Supplement: s1 [file s1]

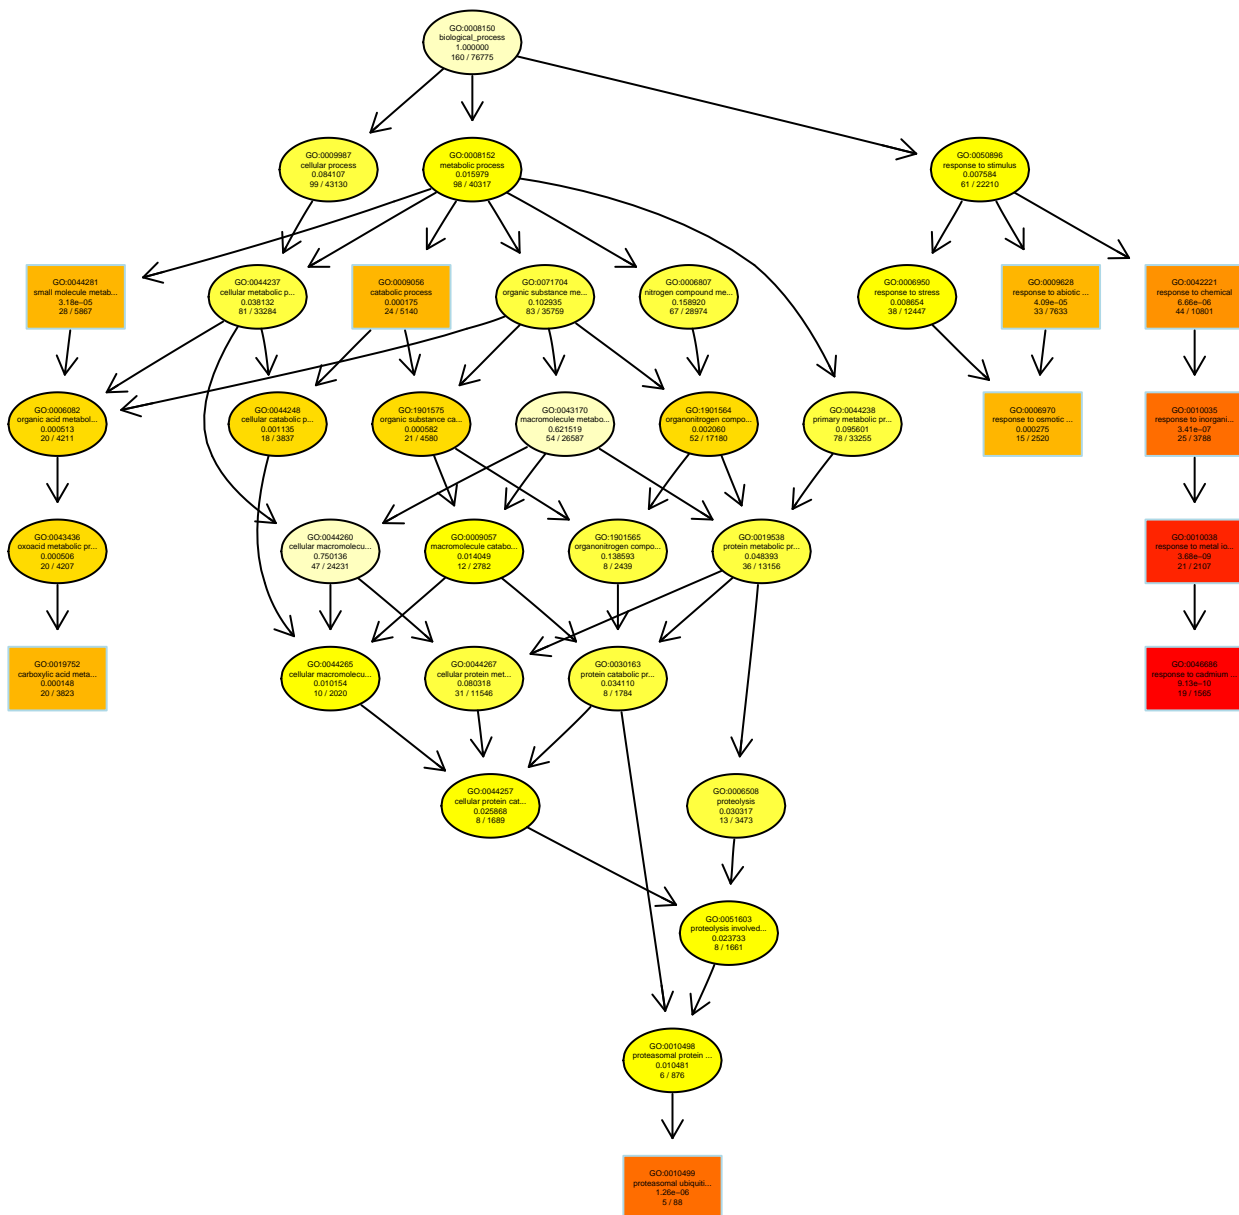

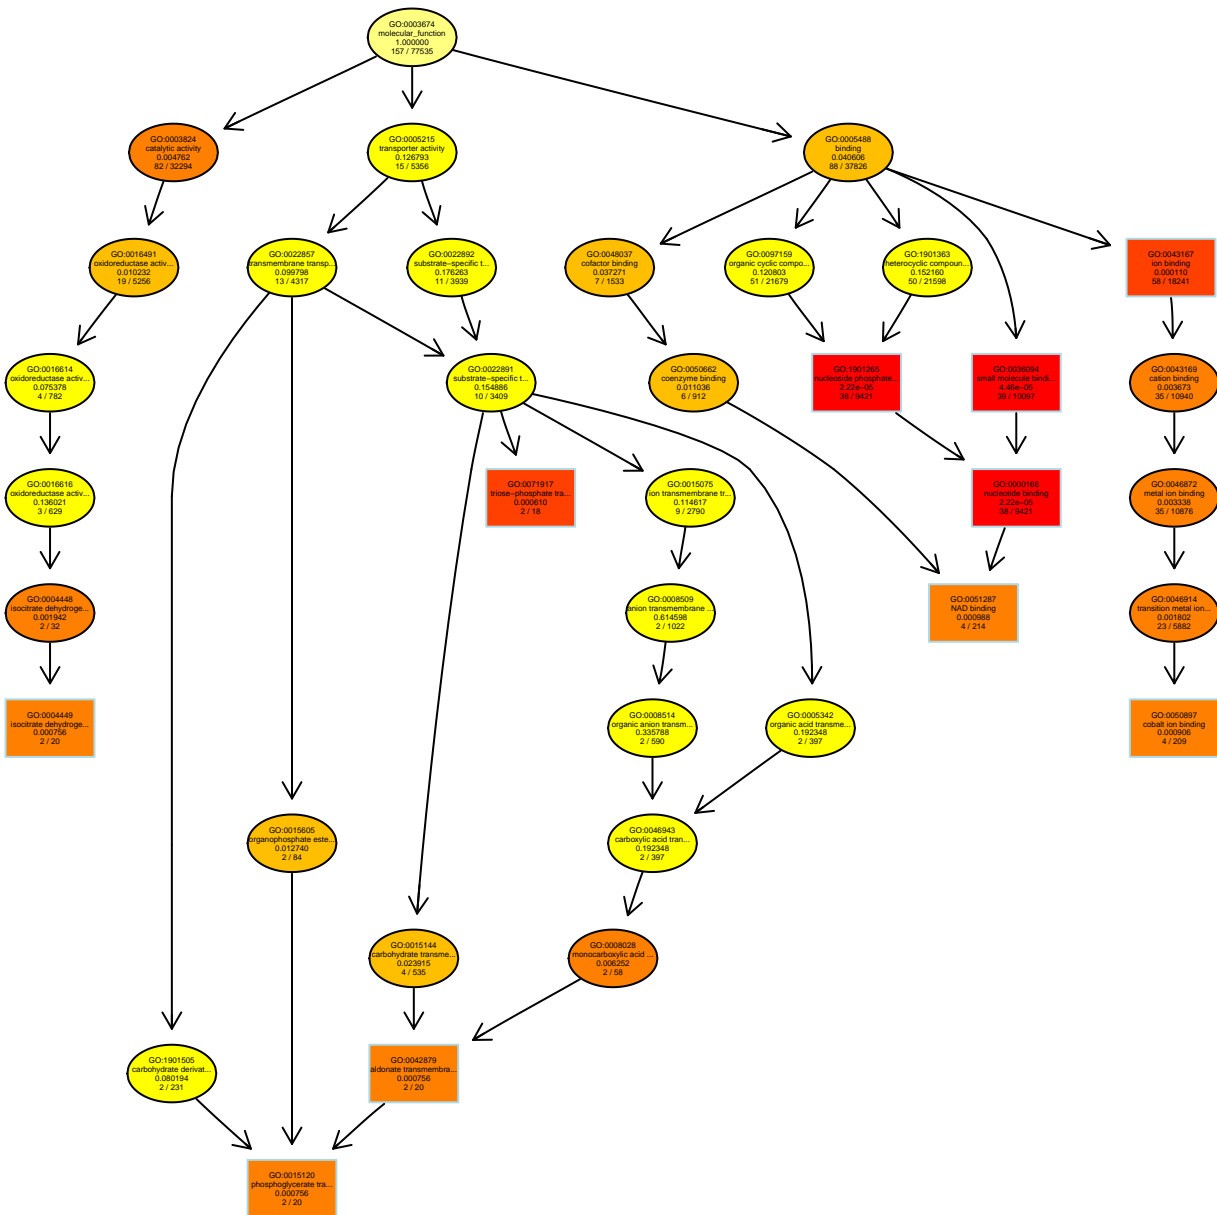

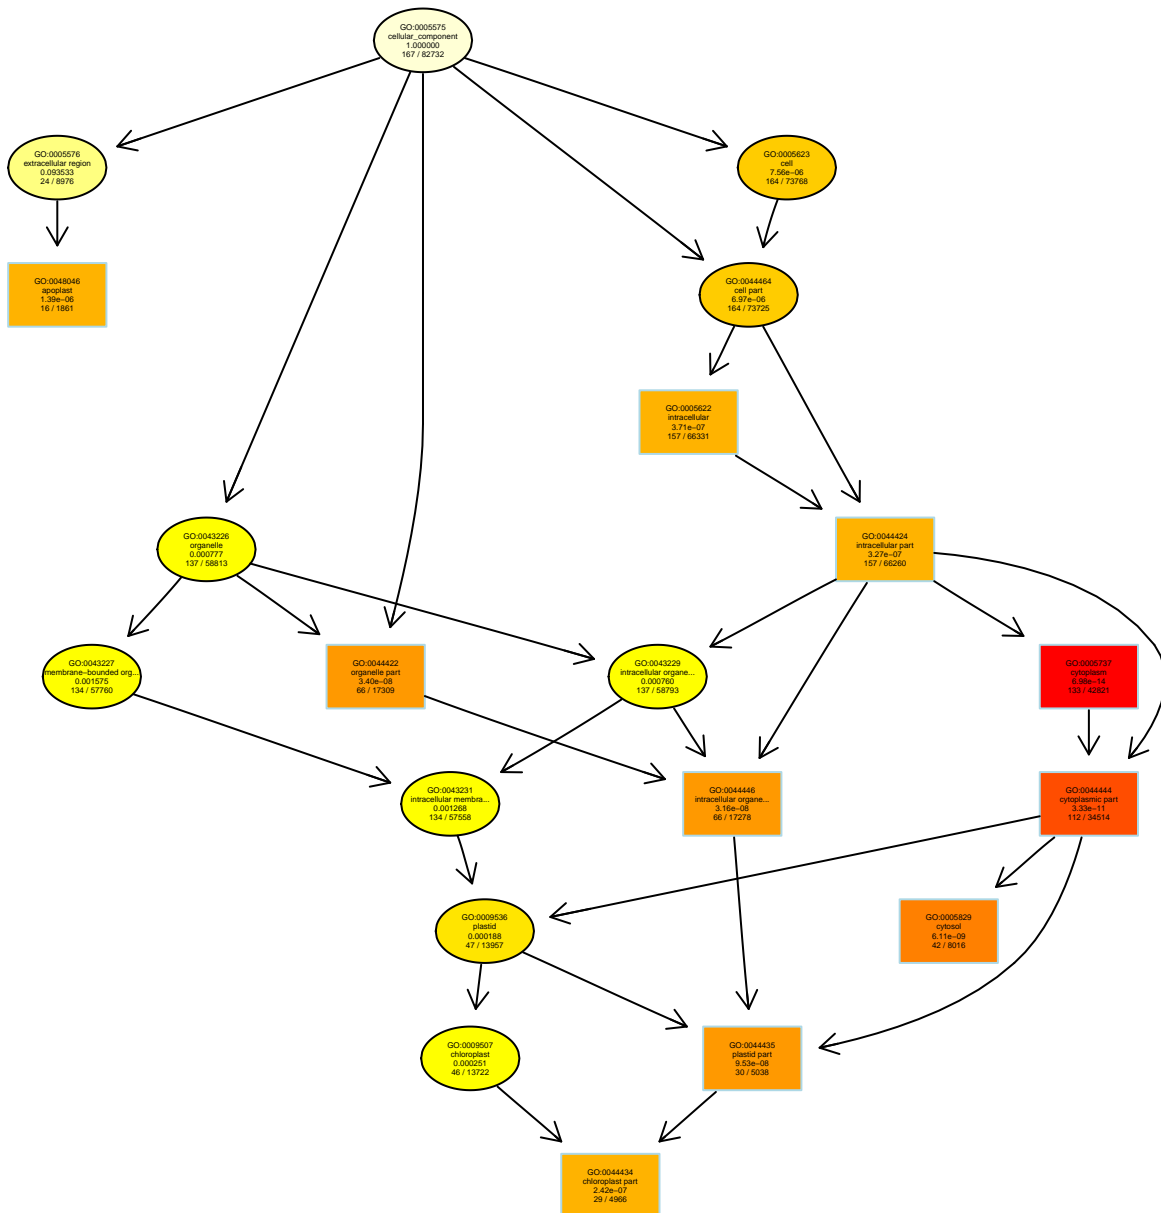

Supplement: s1 [file s1]

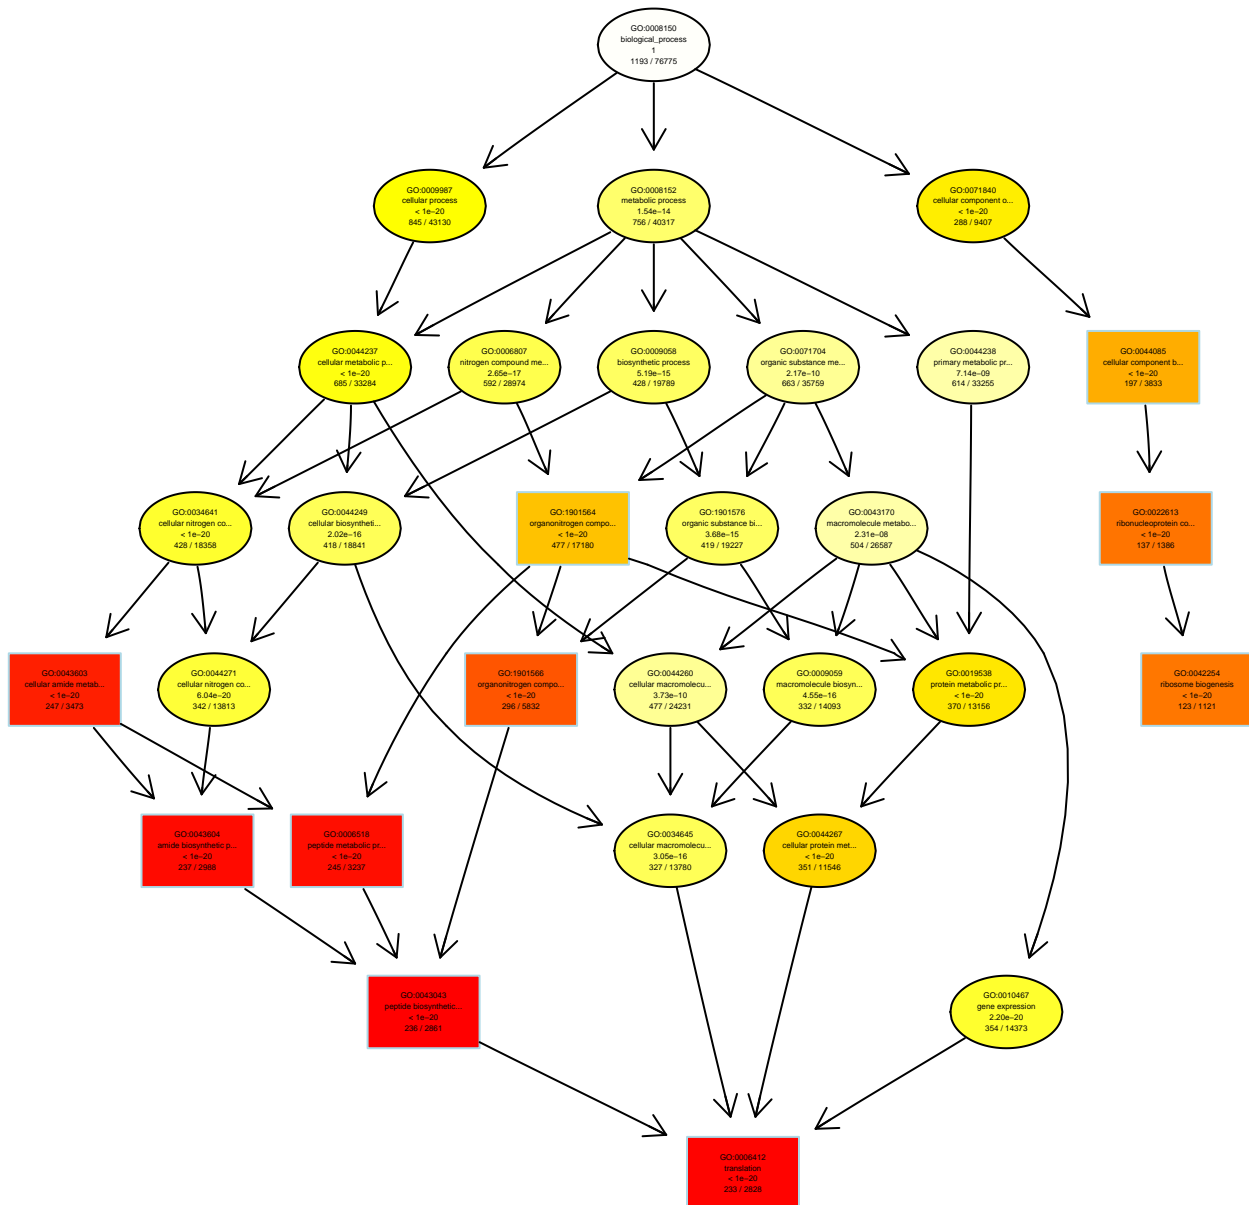

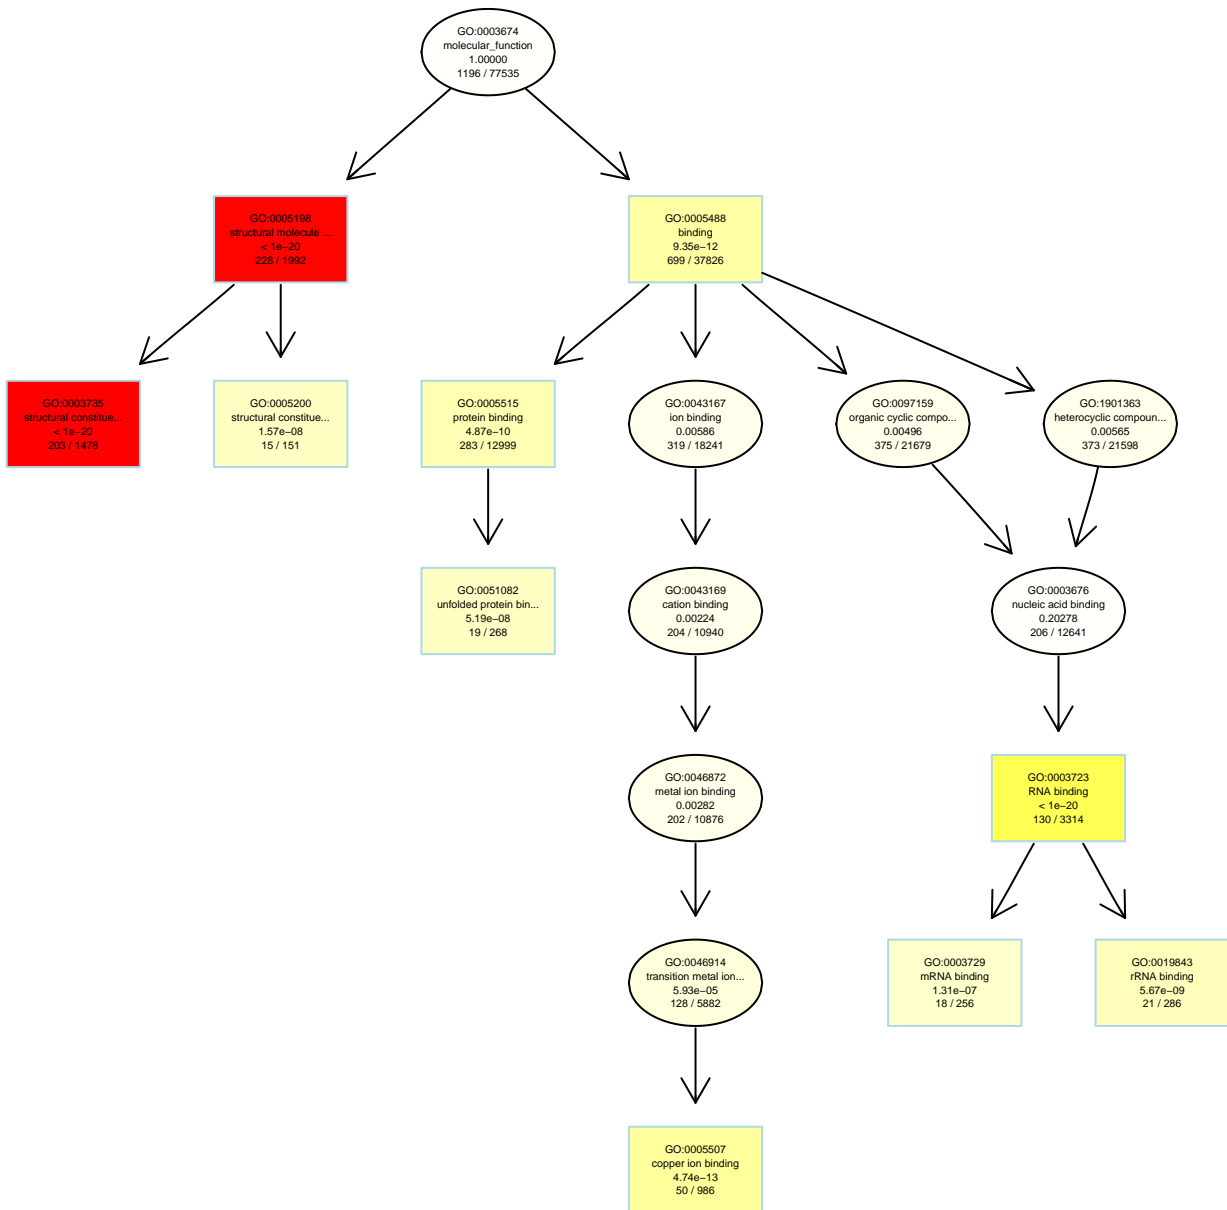

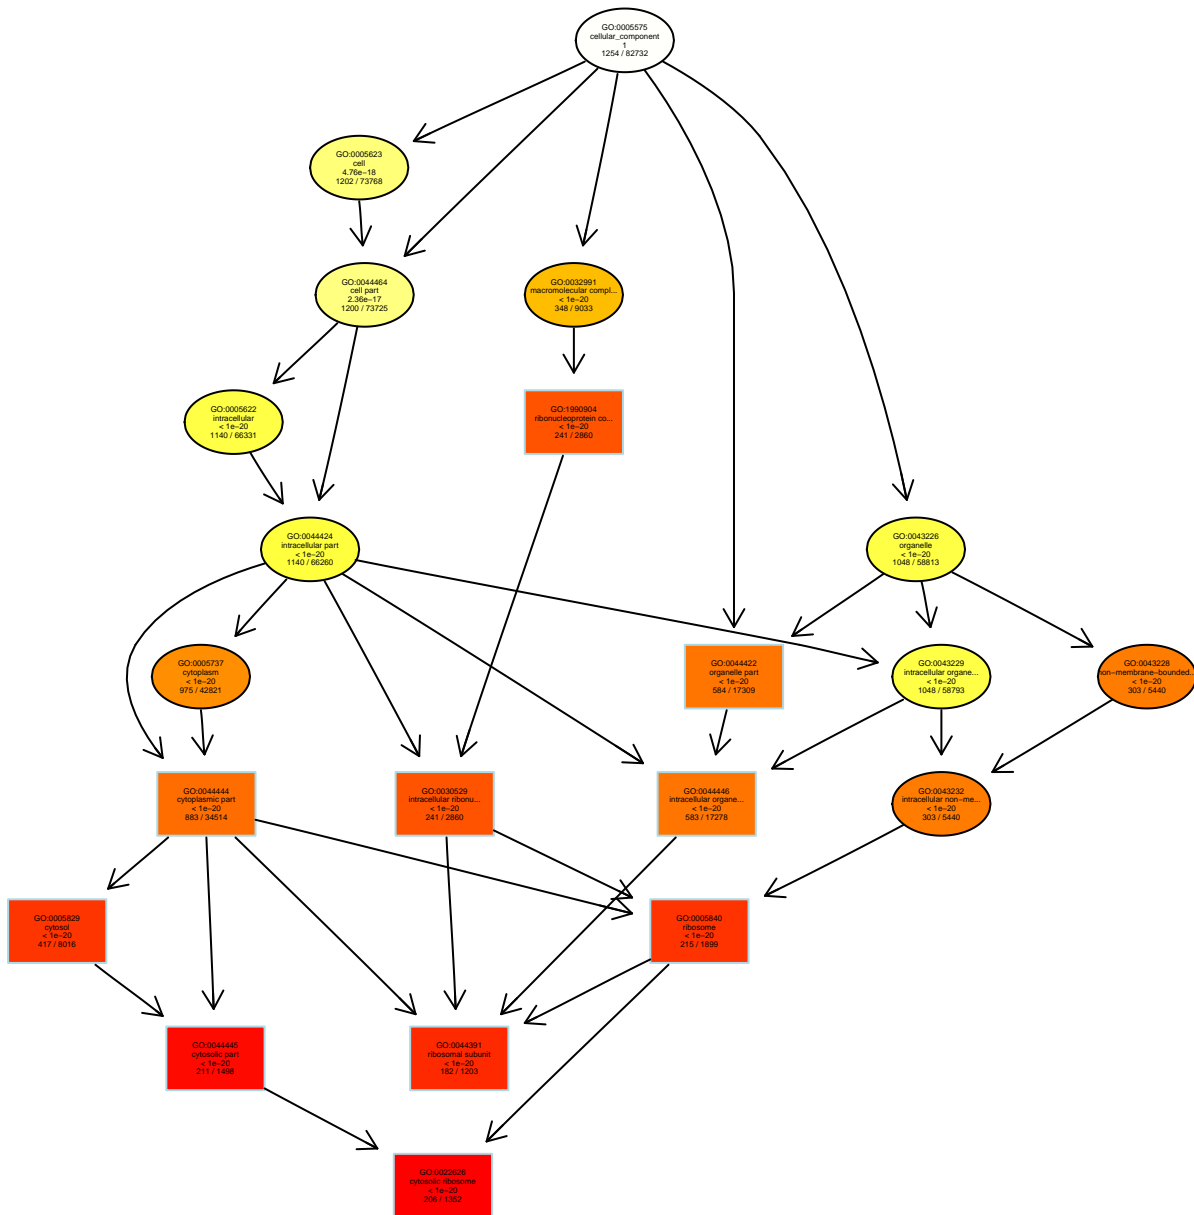

Supplement: s1 [file s1]

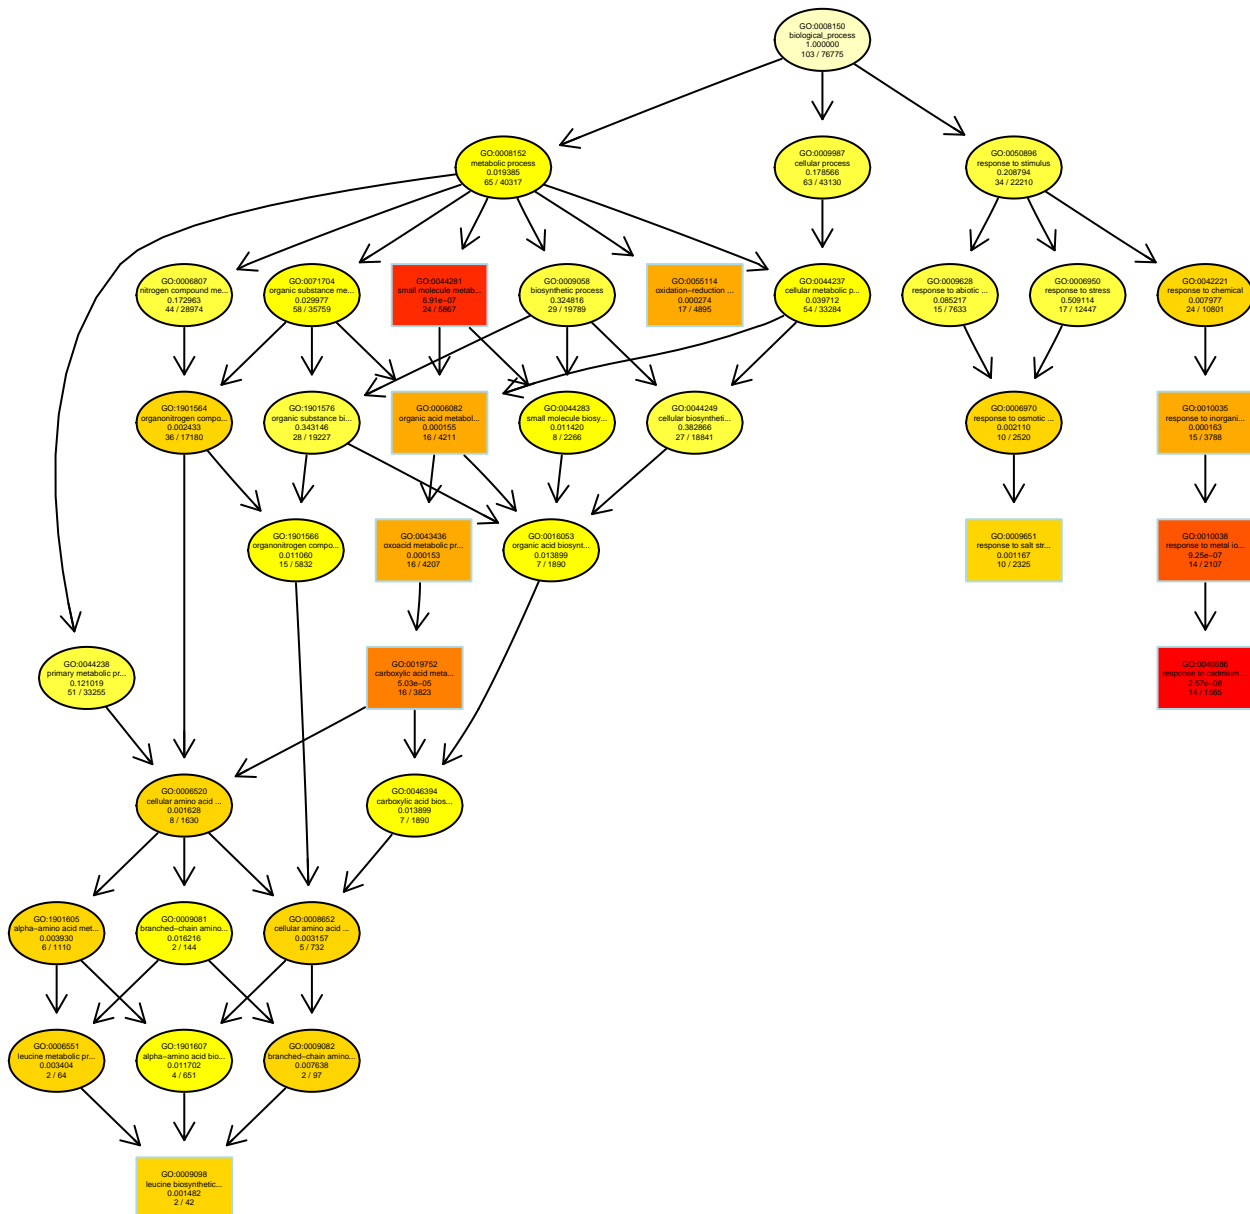

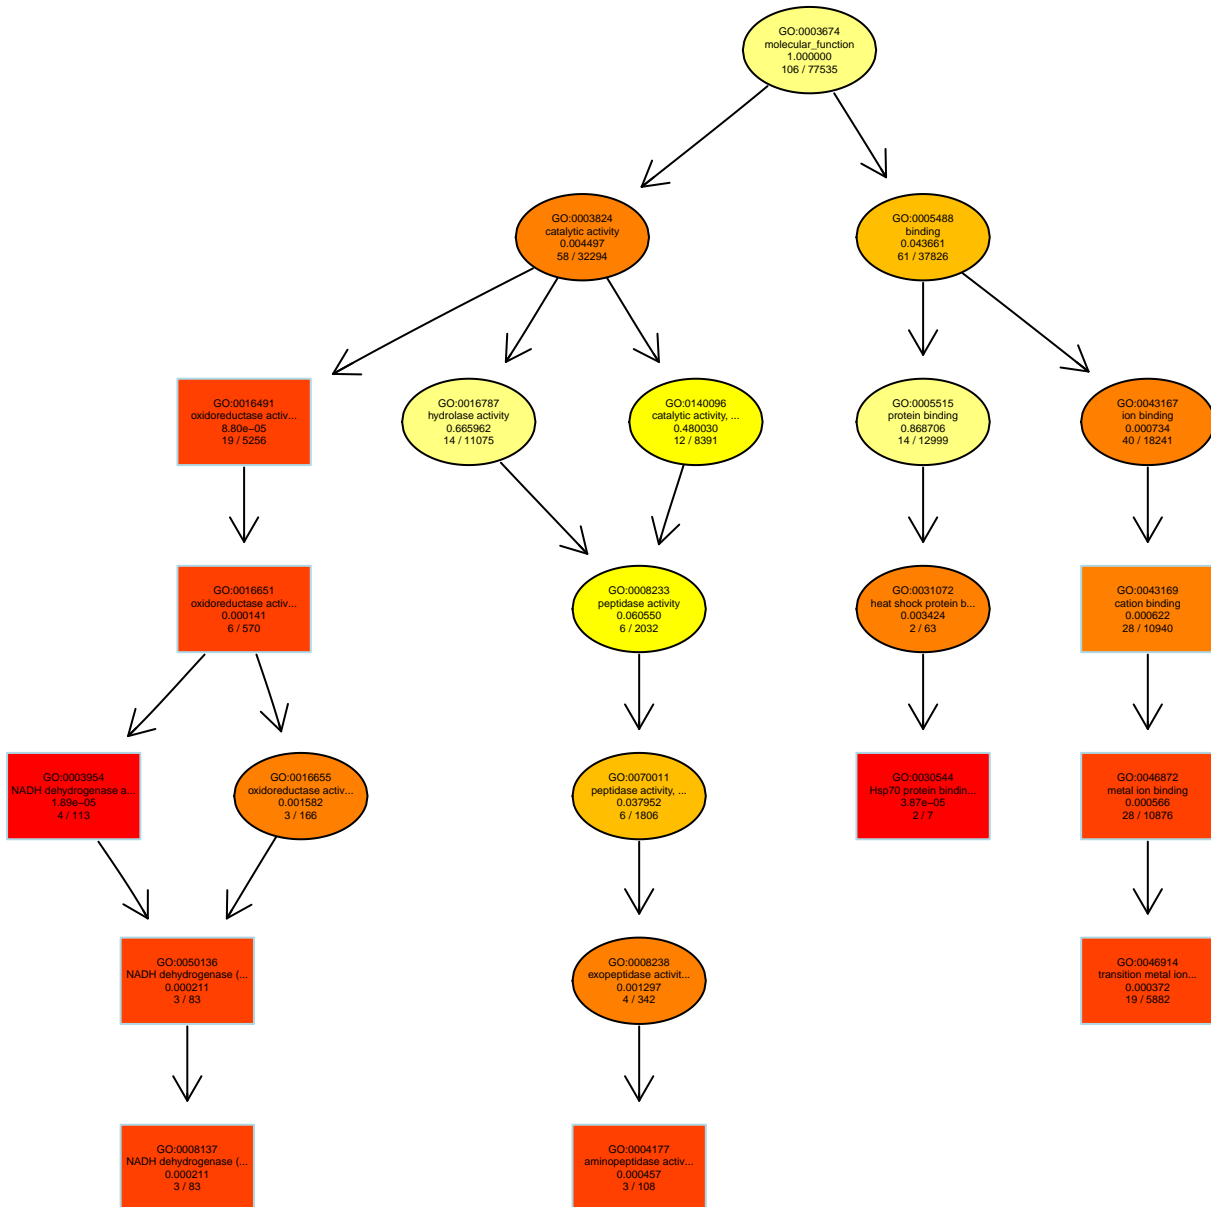

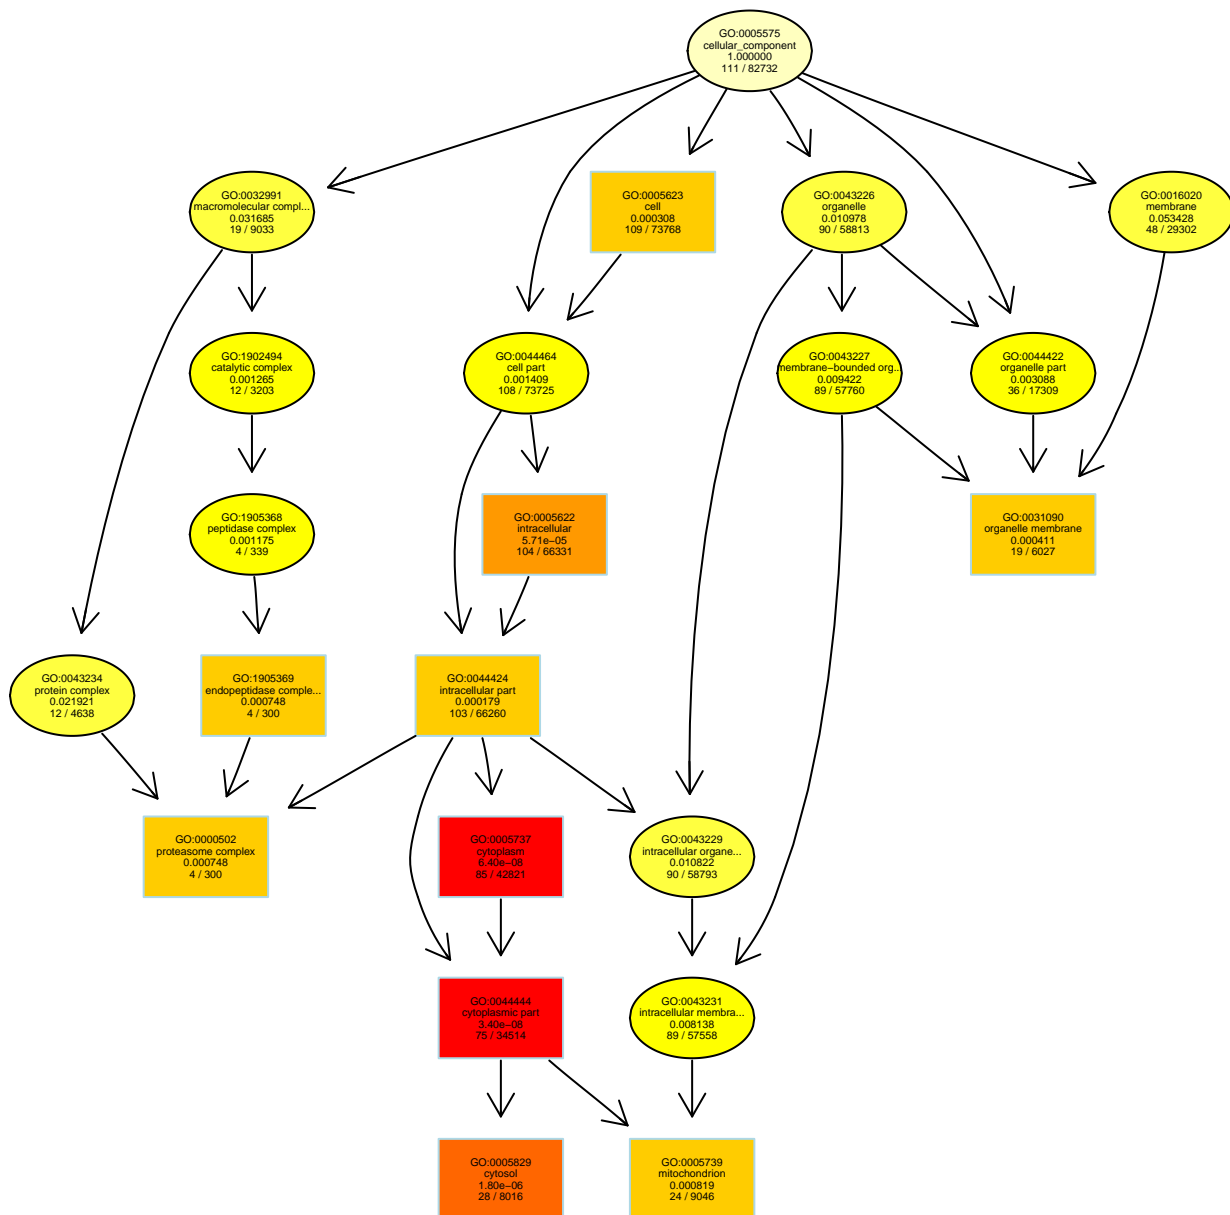

Supplement: s1 [file s1]

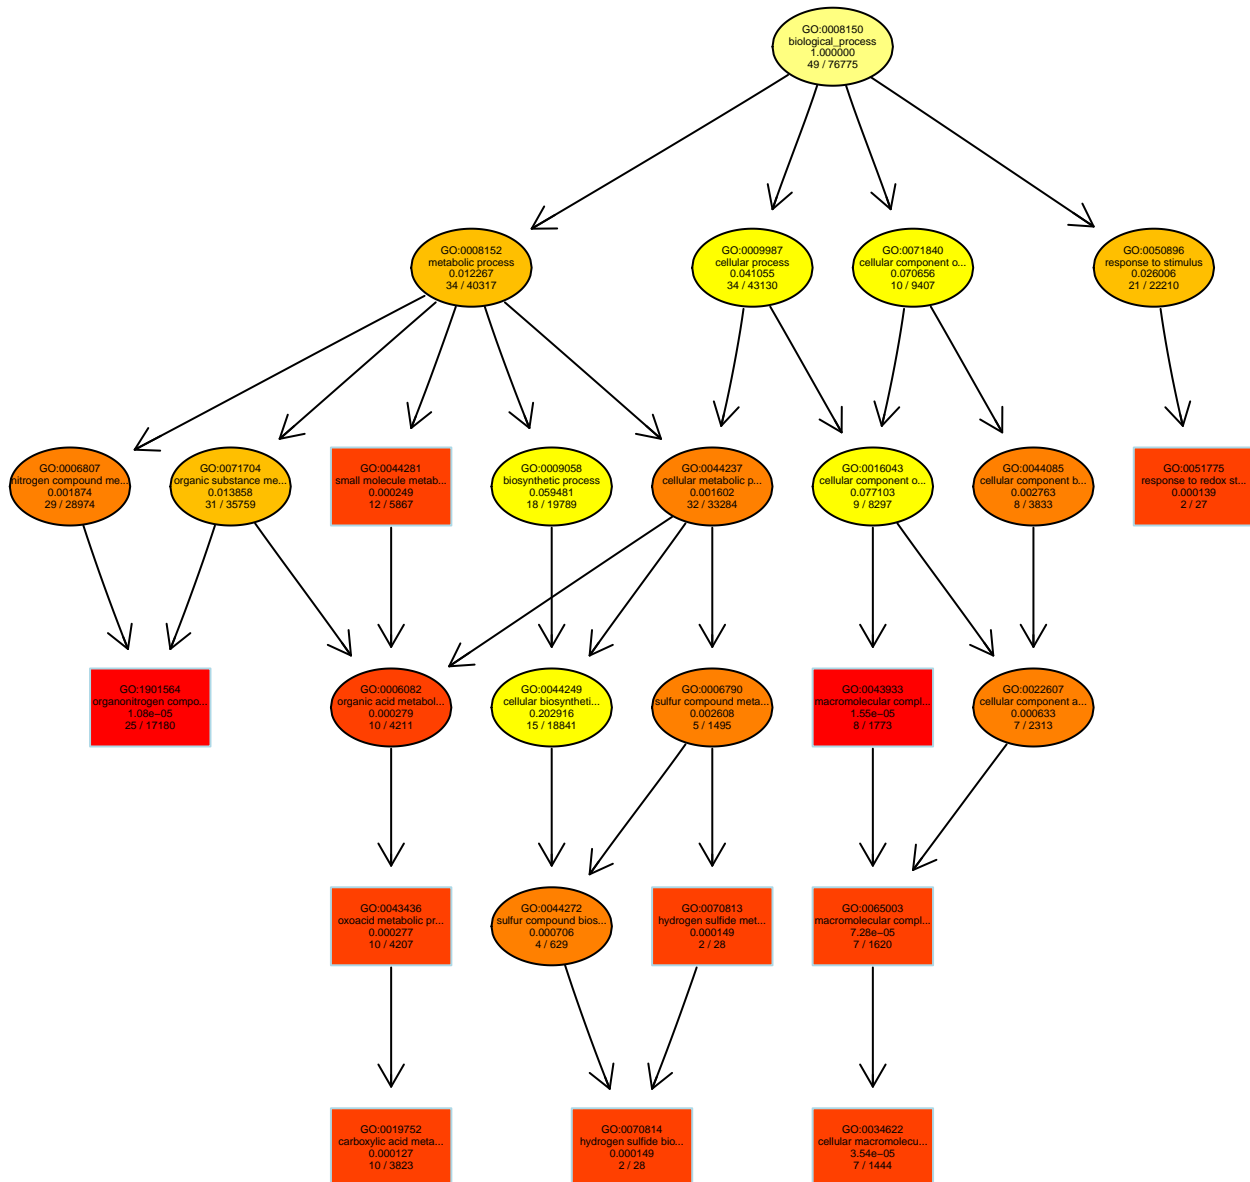

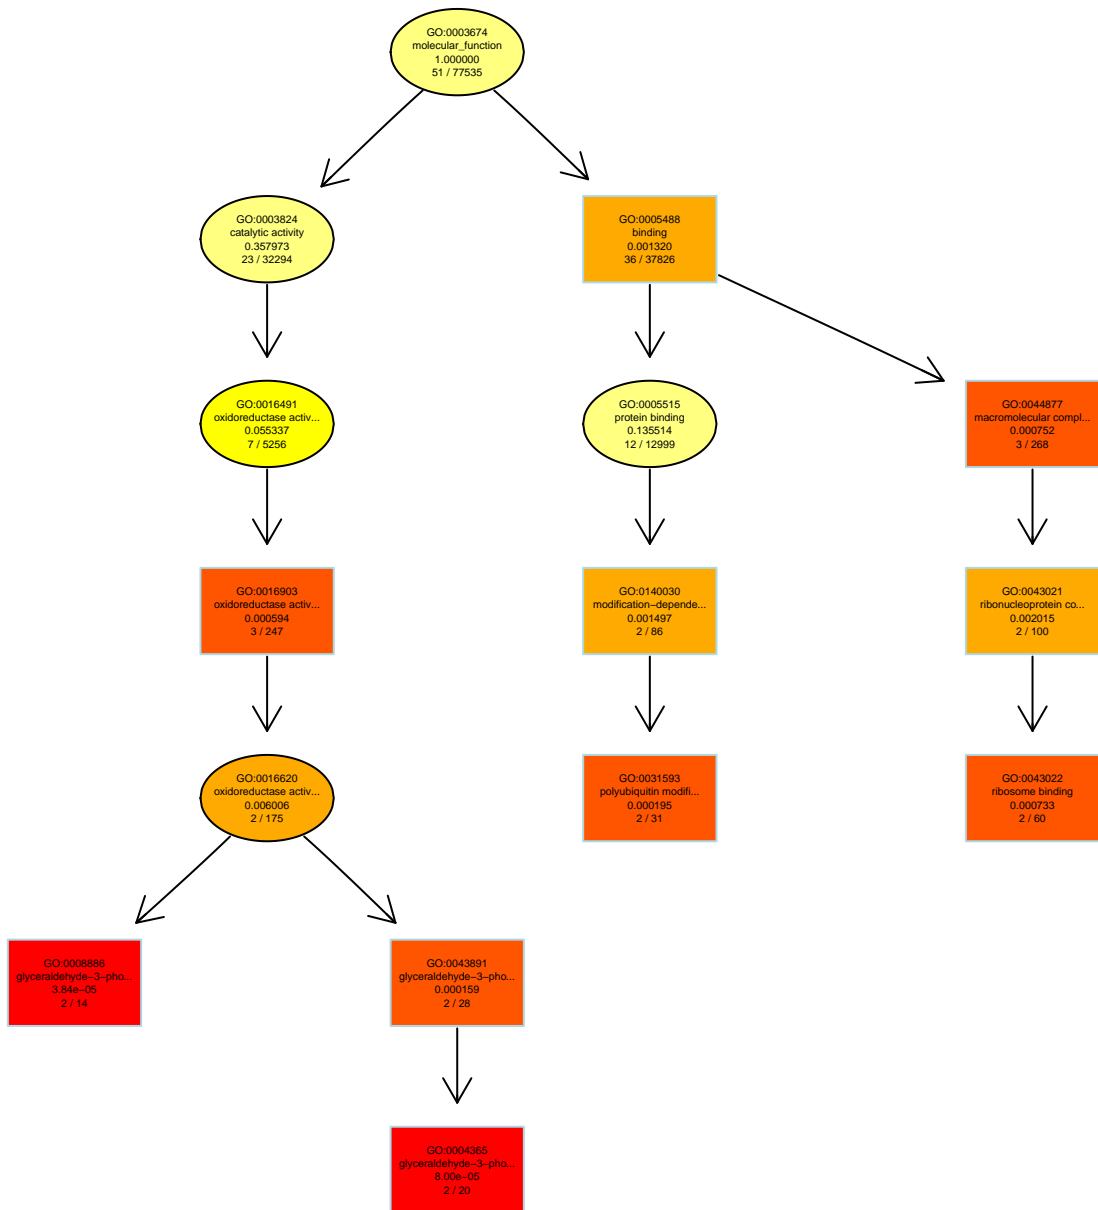

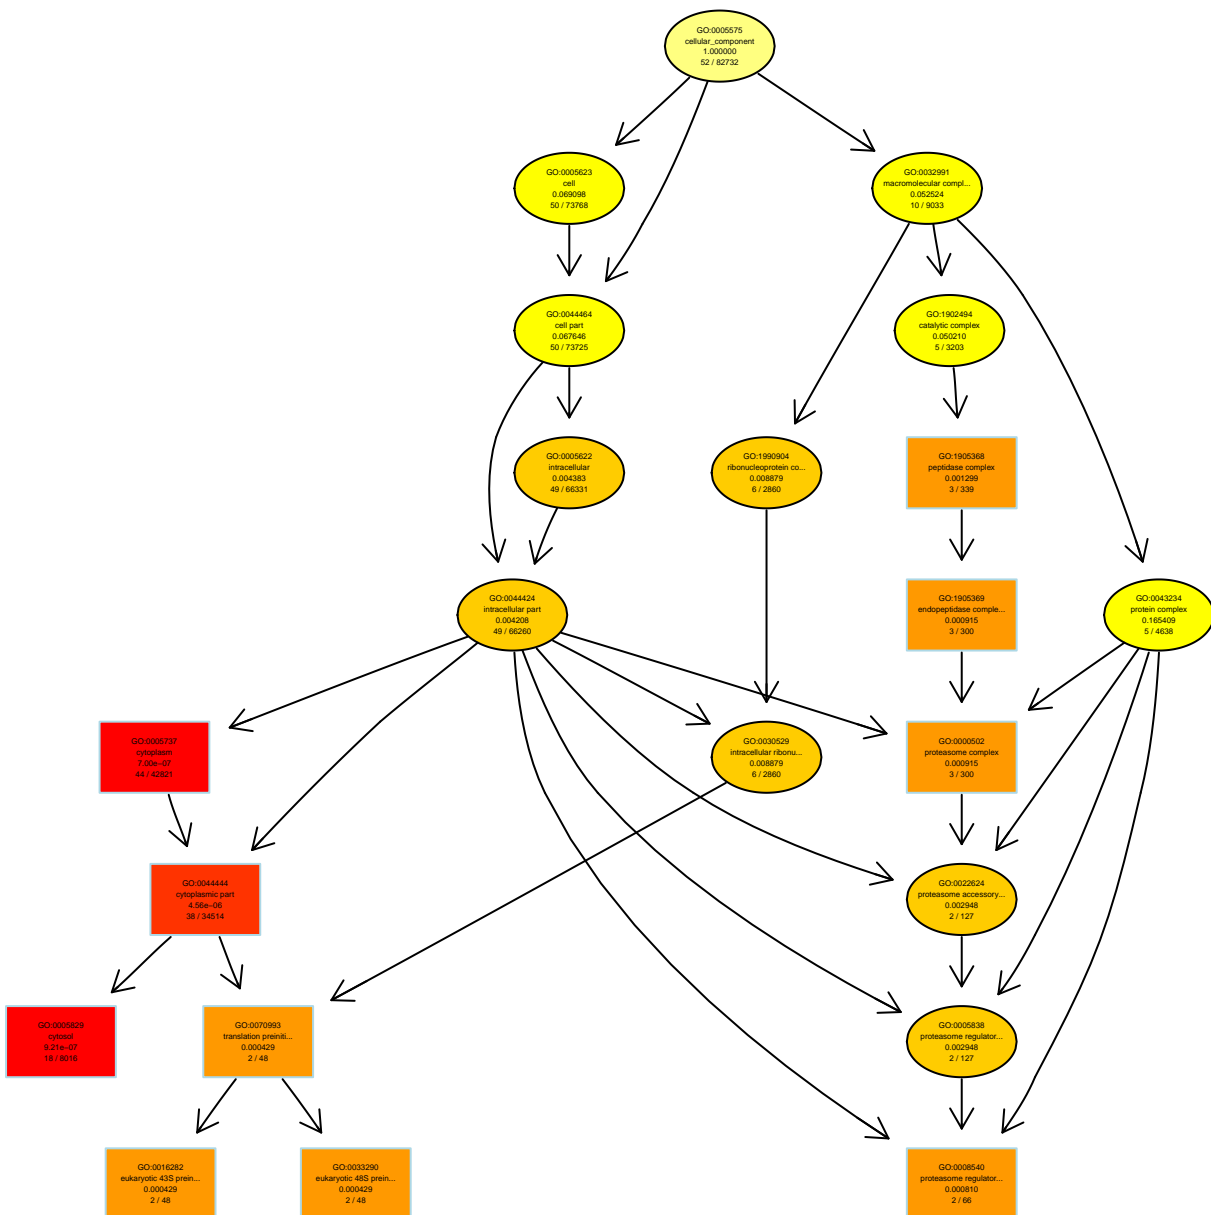

Supplement: s1 [file s1]







Supplement: s1 [file s1]

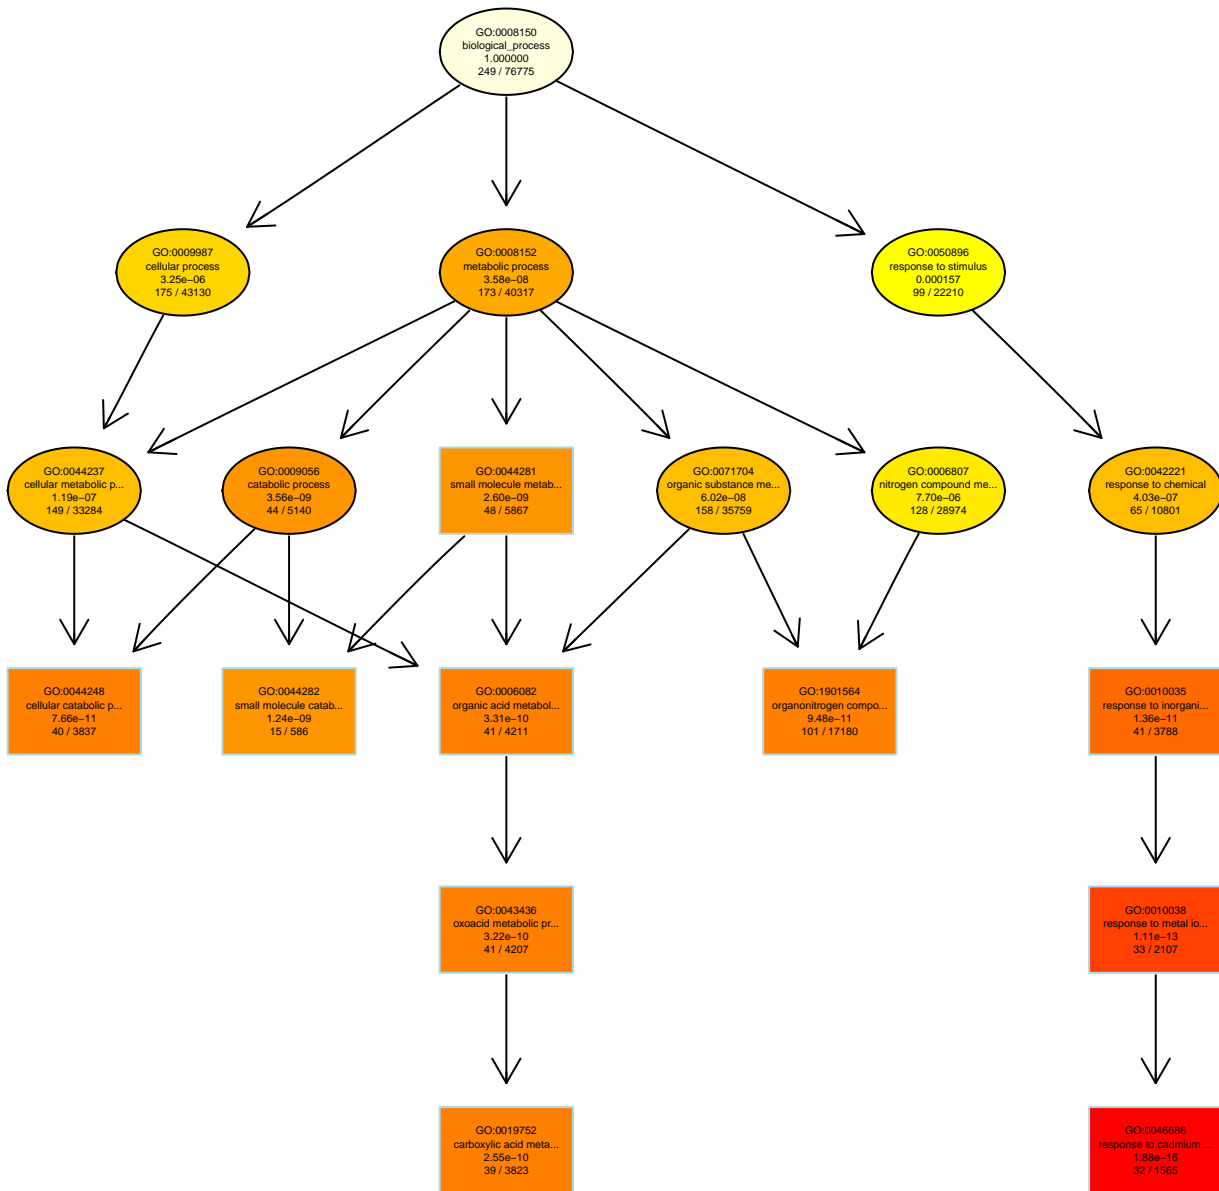

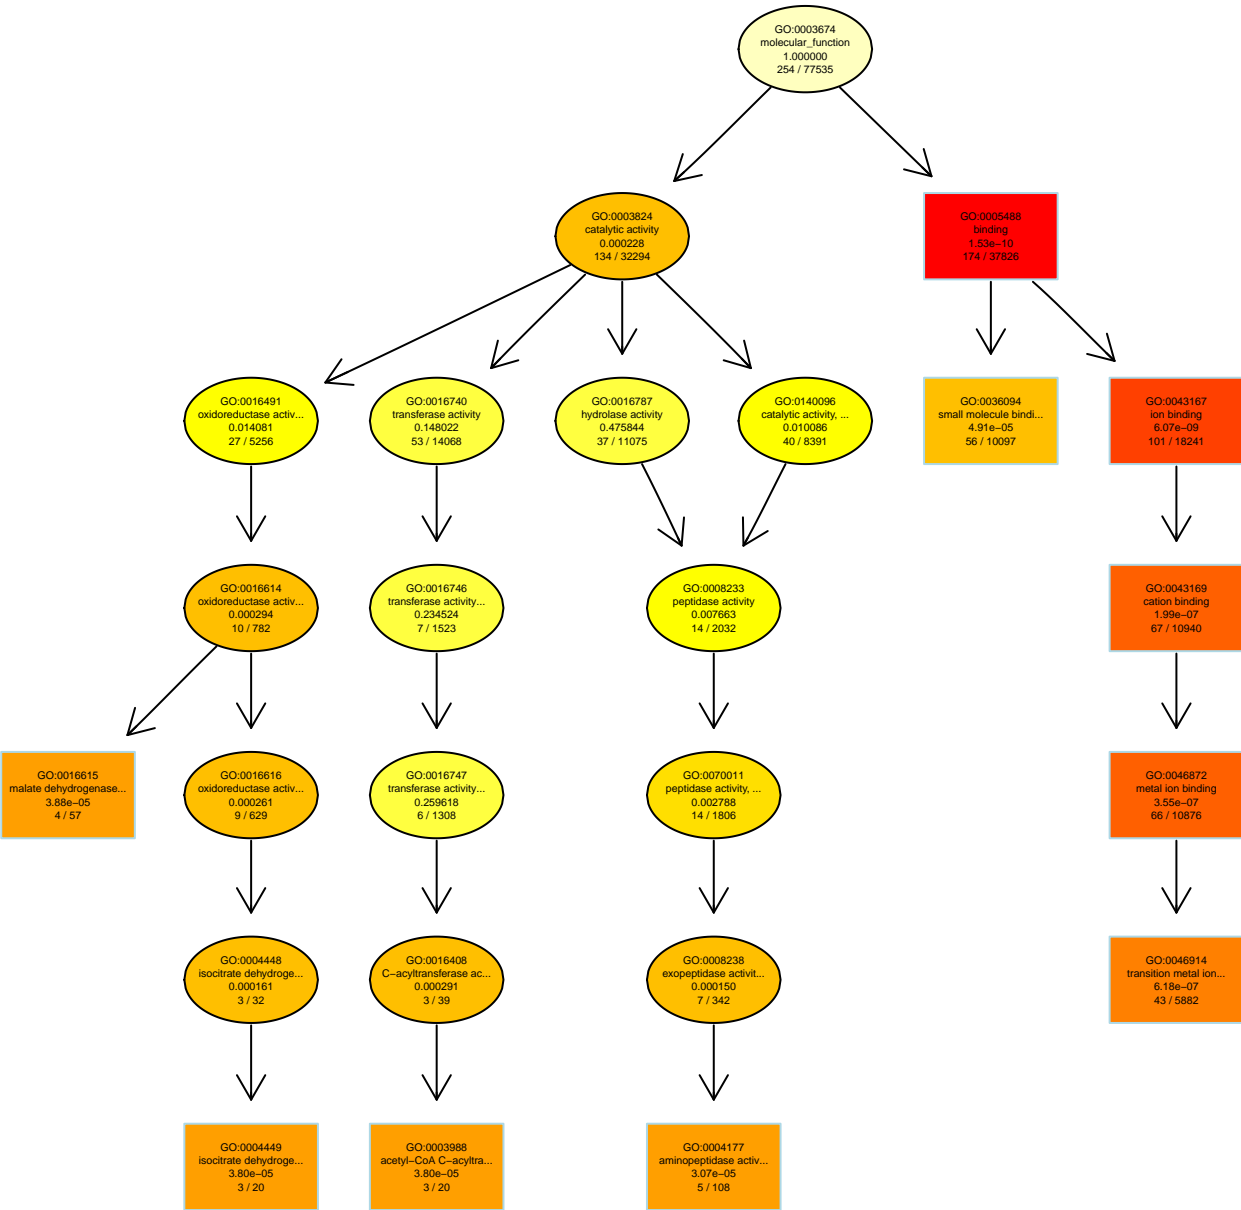

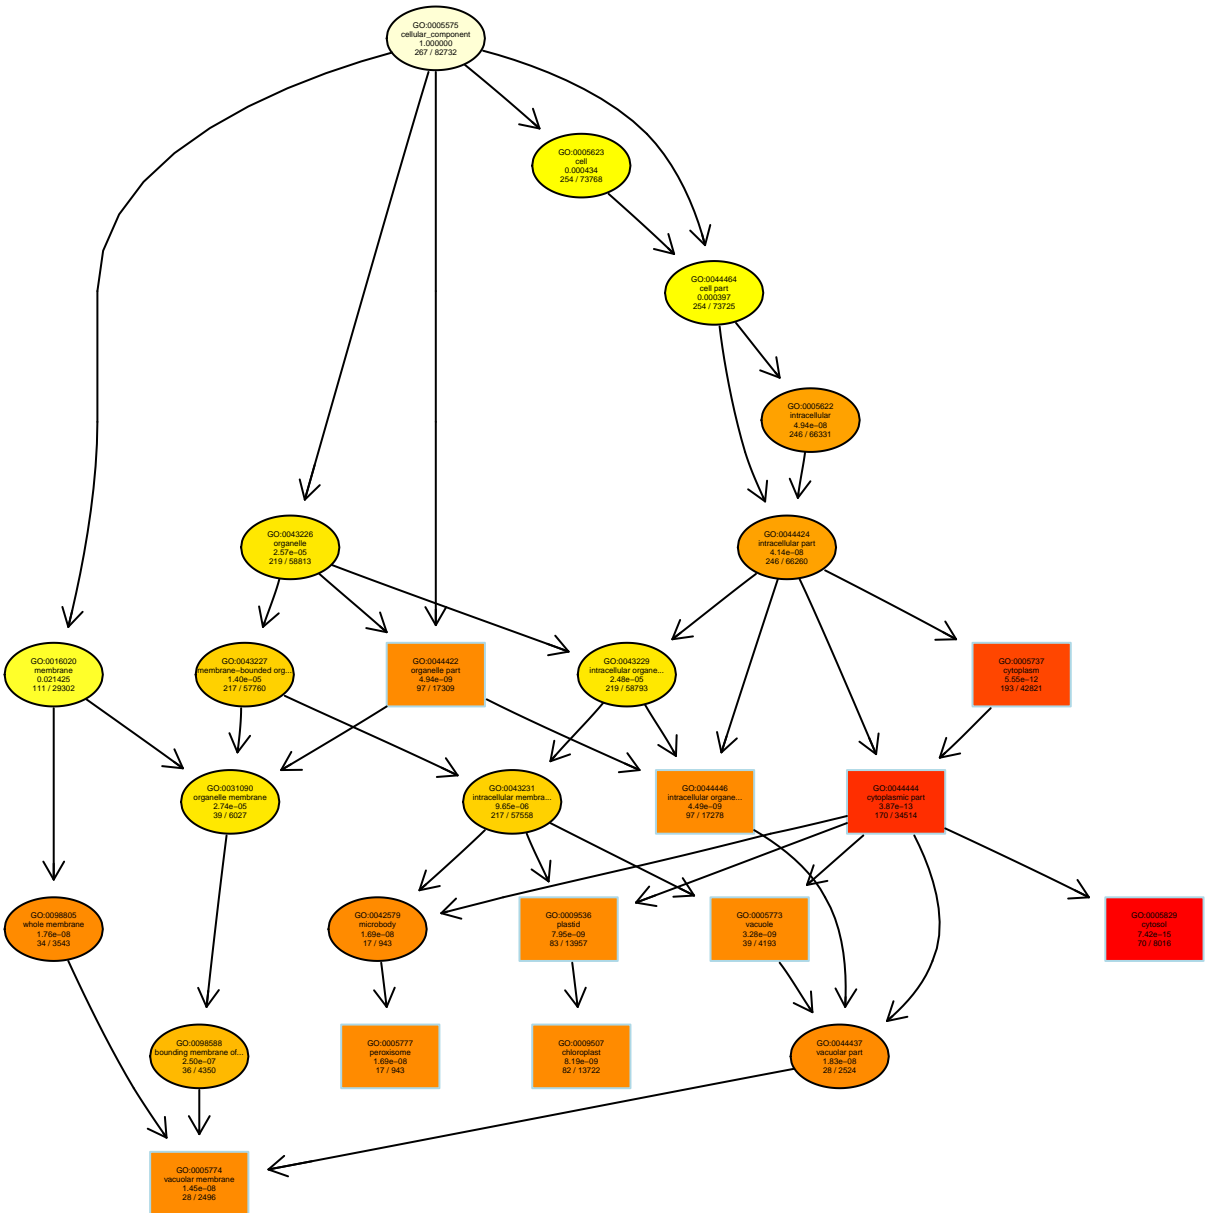

Supplement: s1 [file s1]

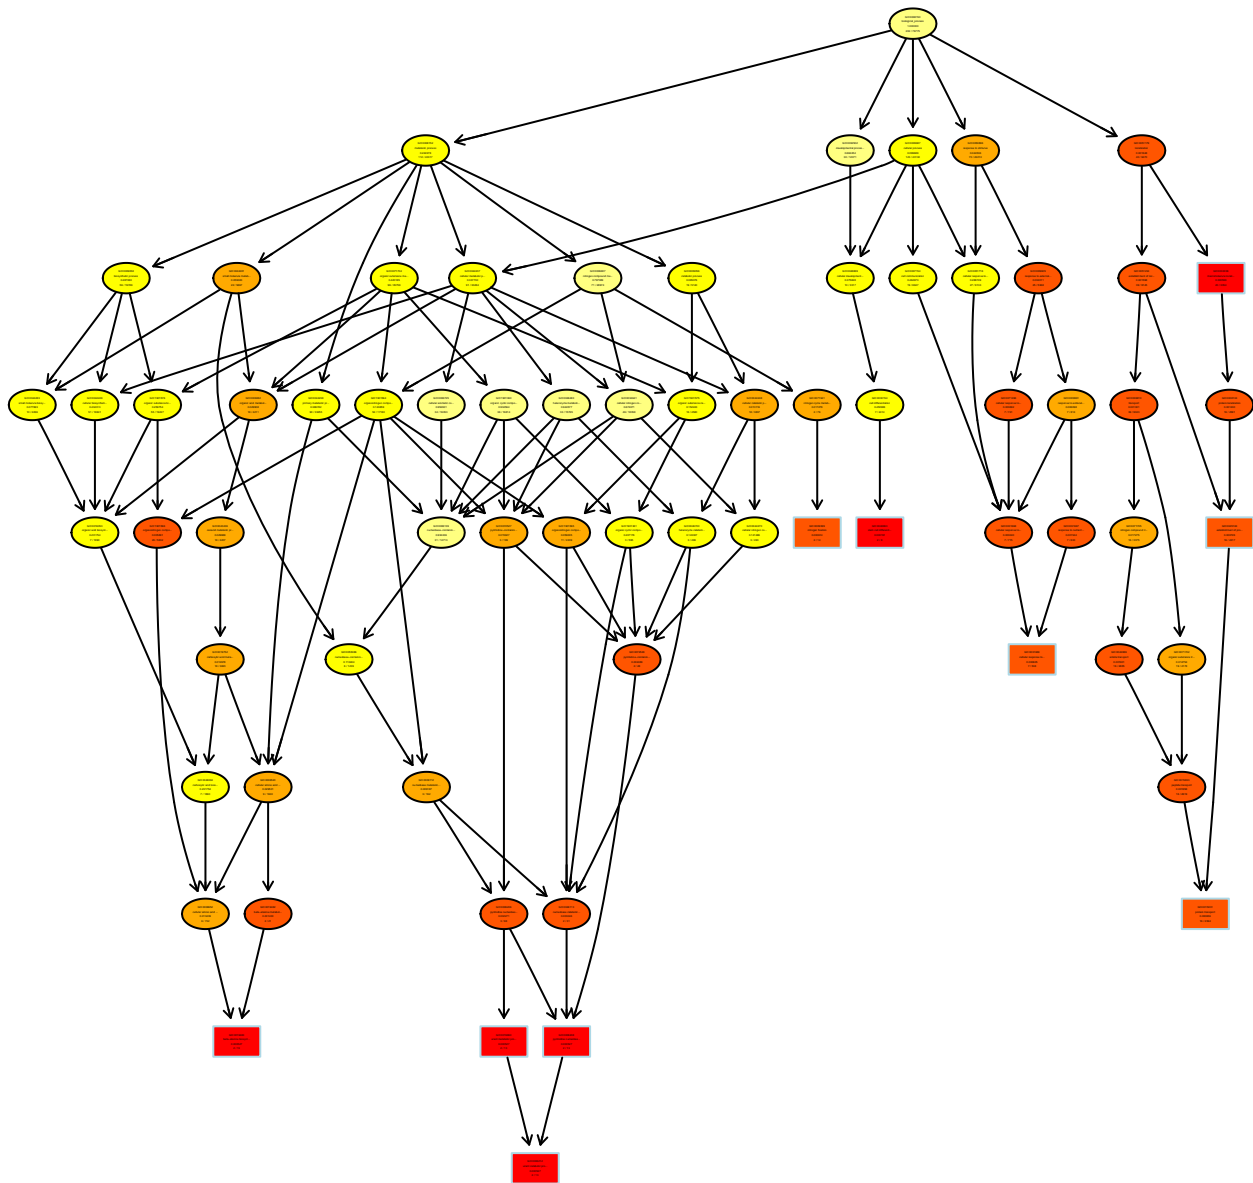

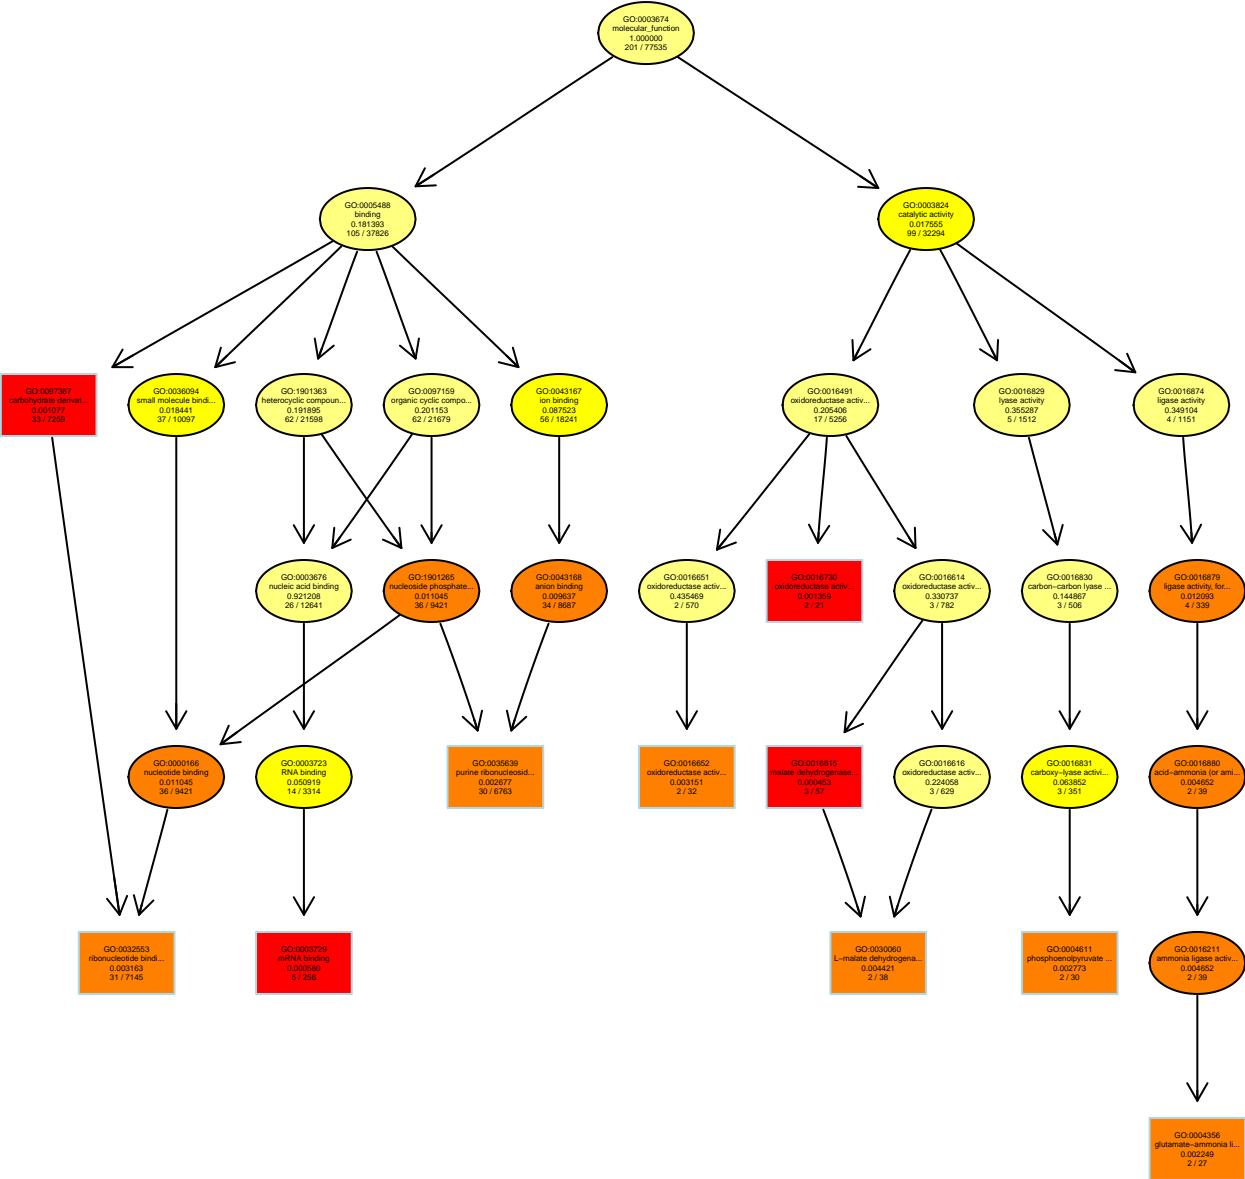

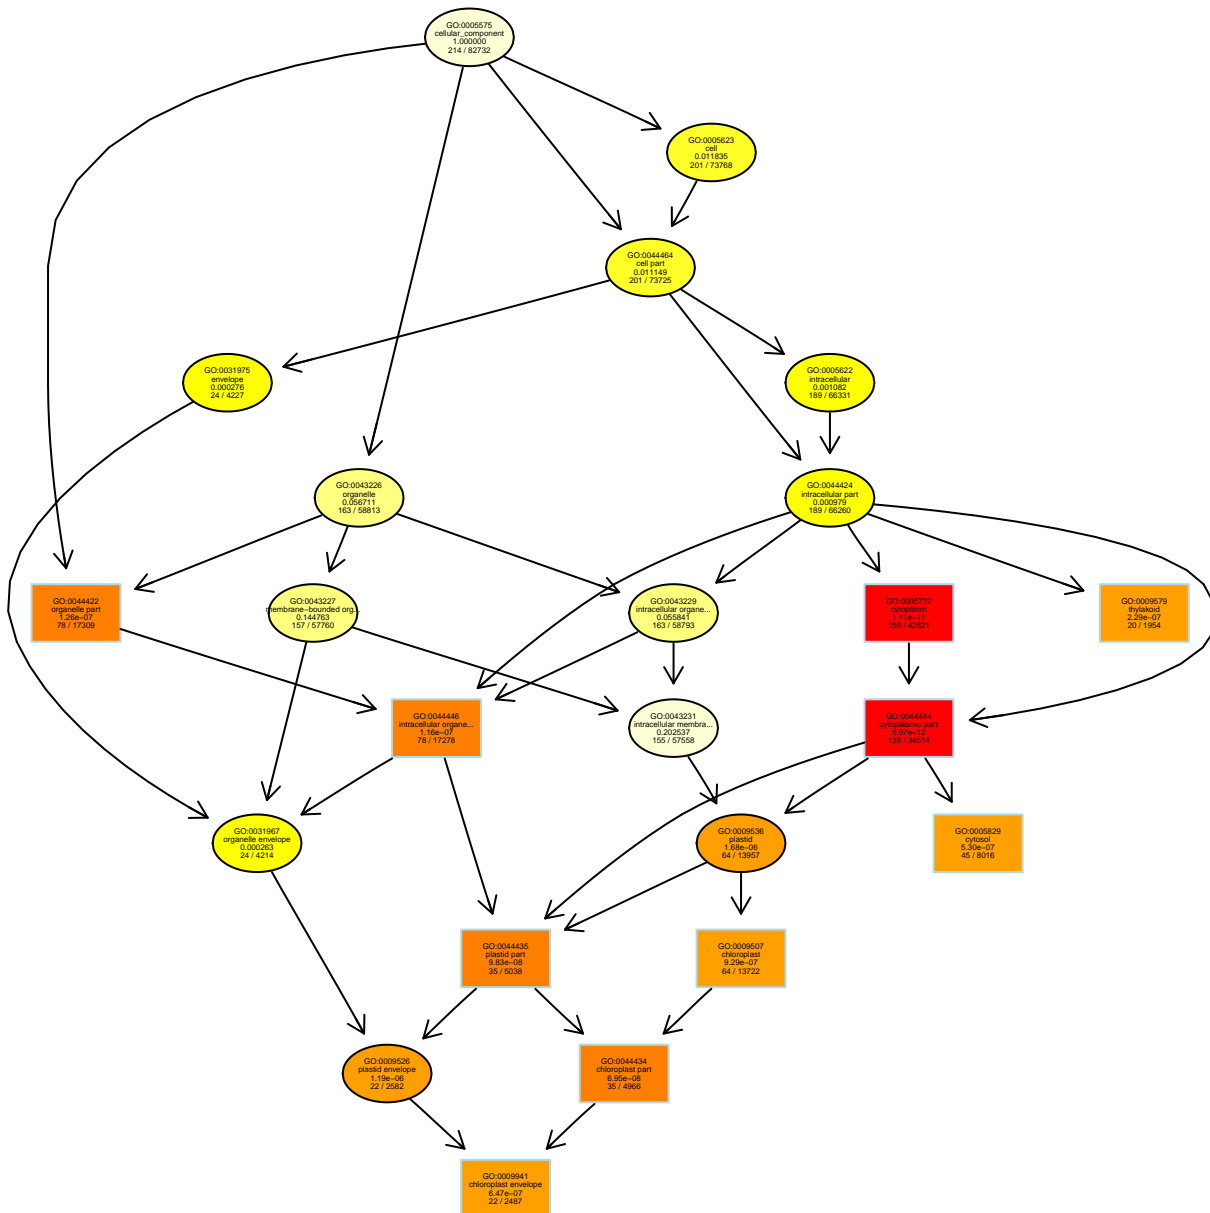

Supplement: s1 [file s1]

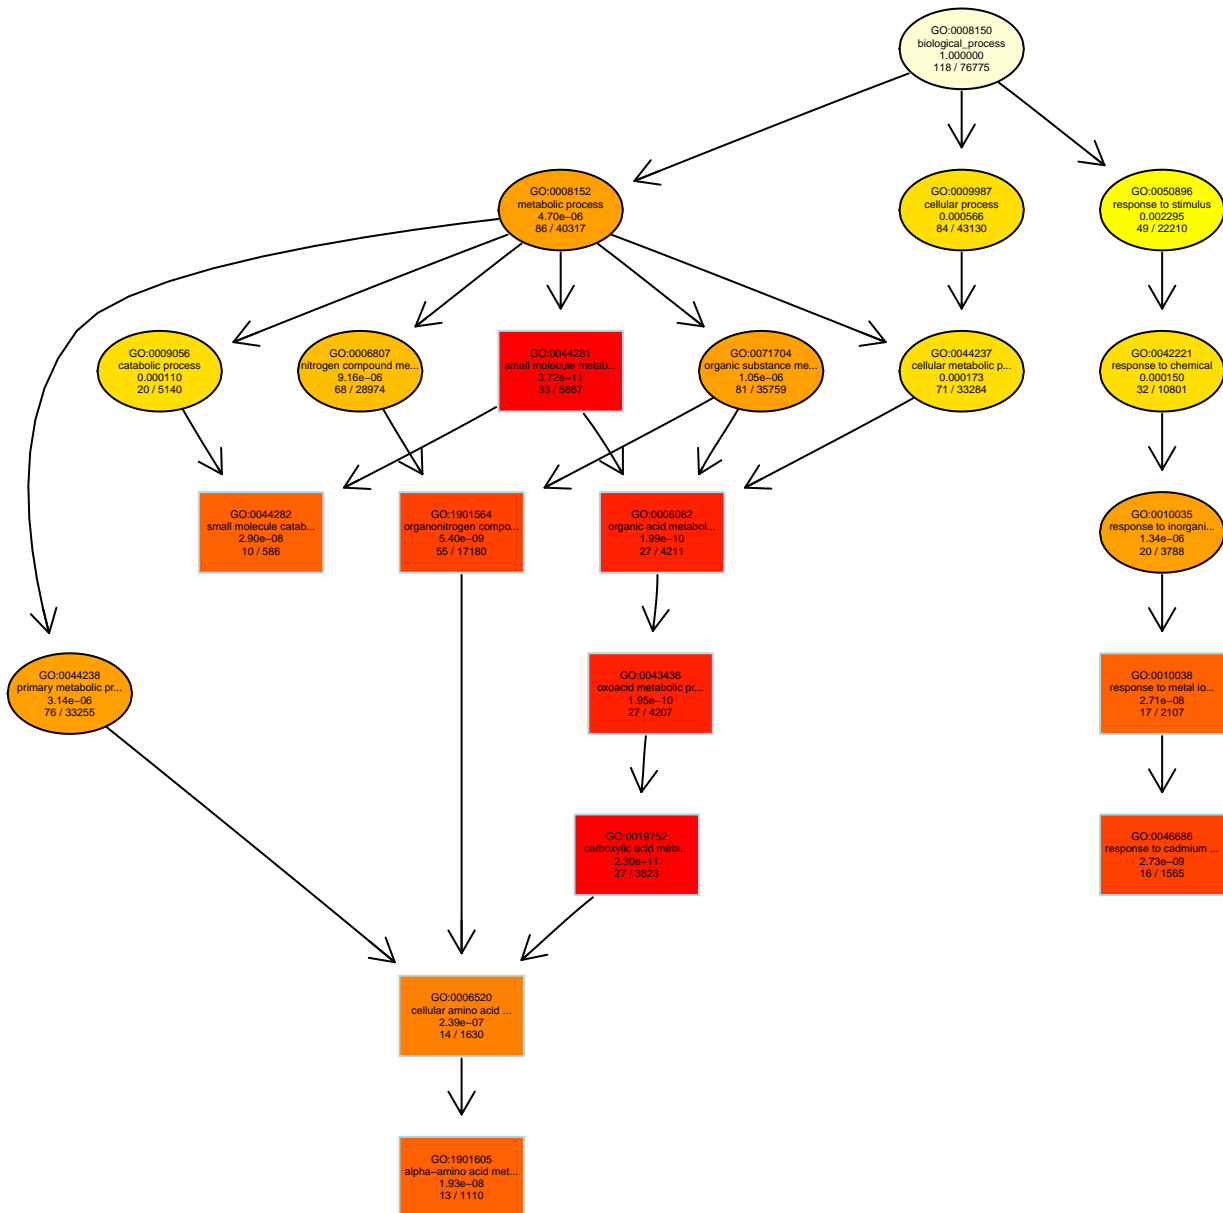

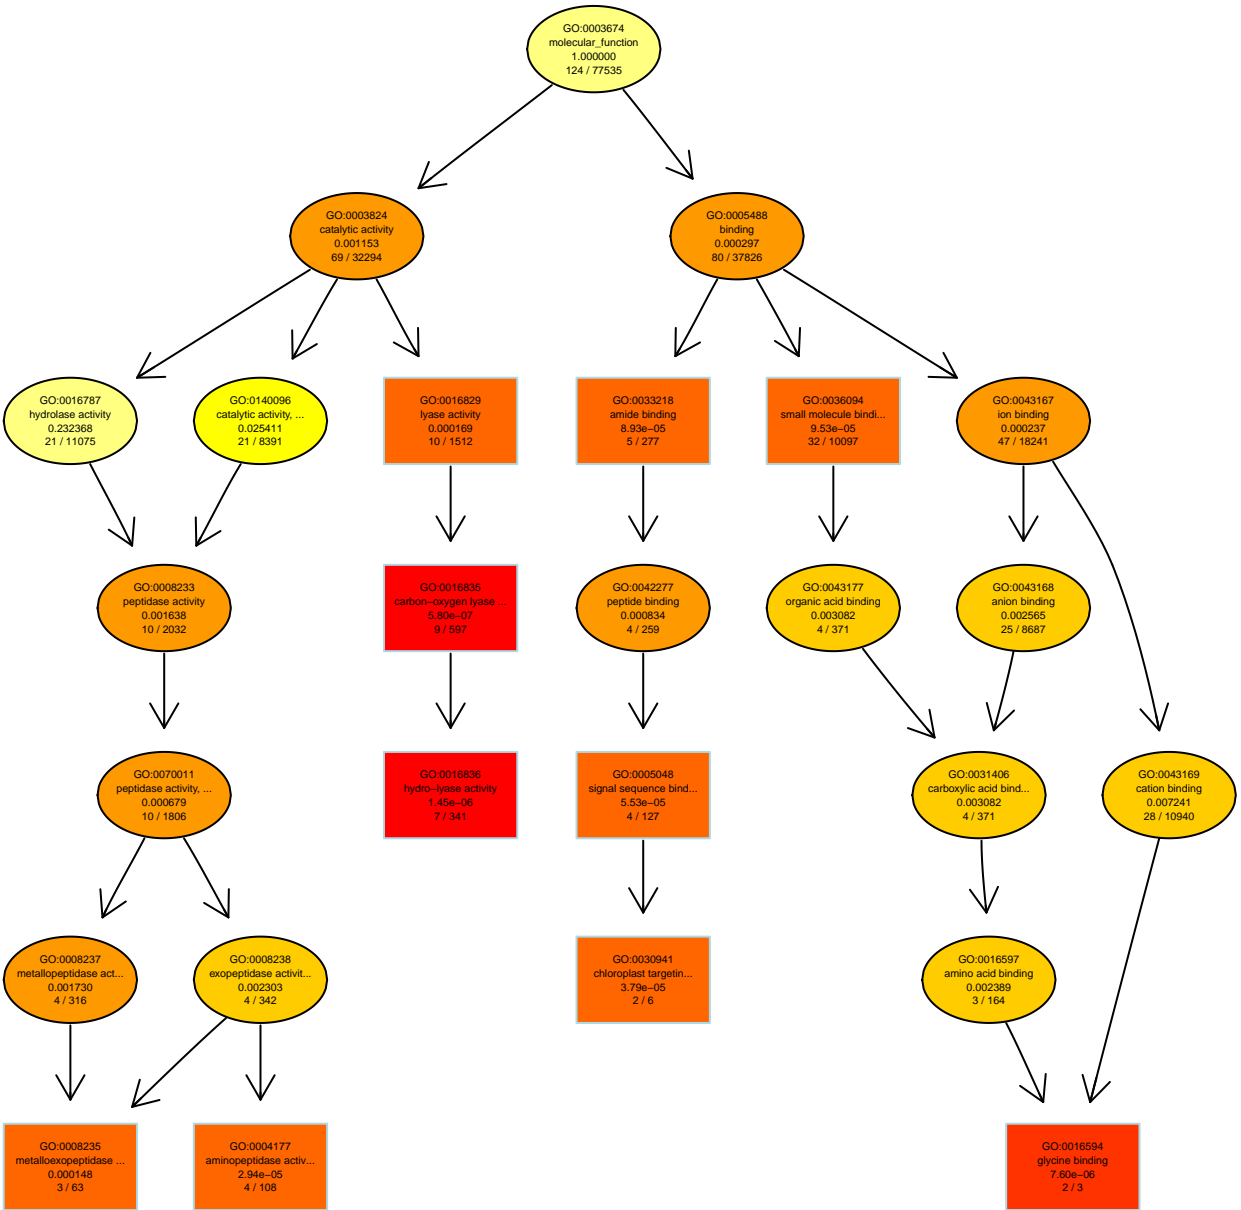

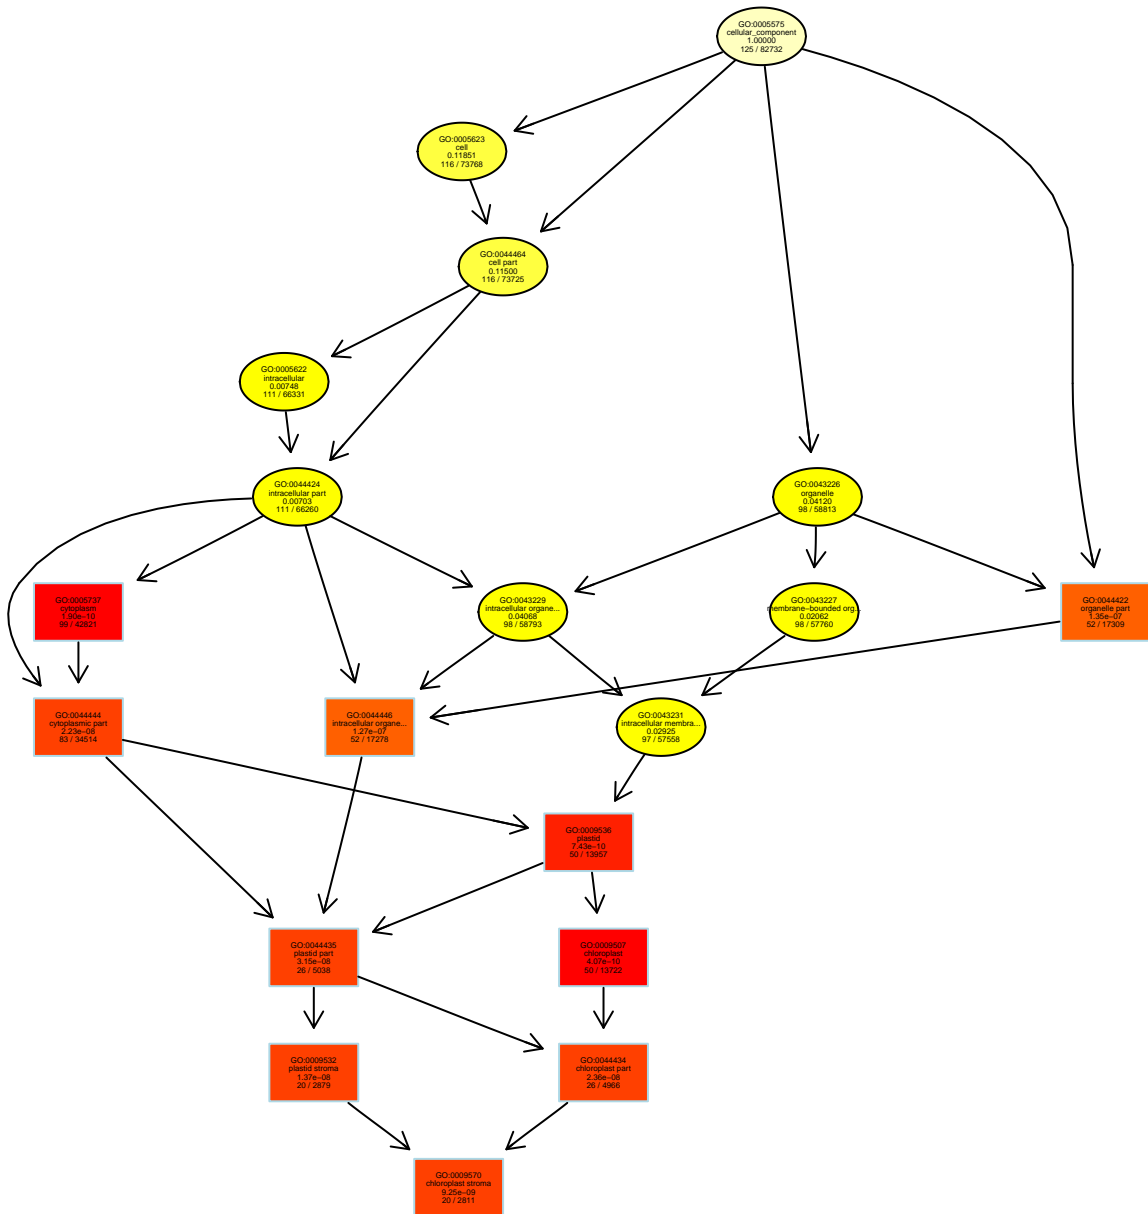

Supplement: s1 [file s1]

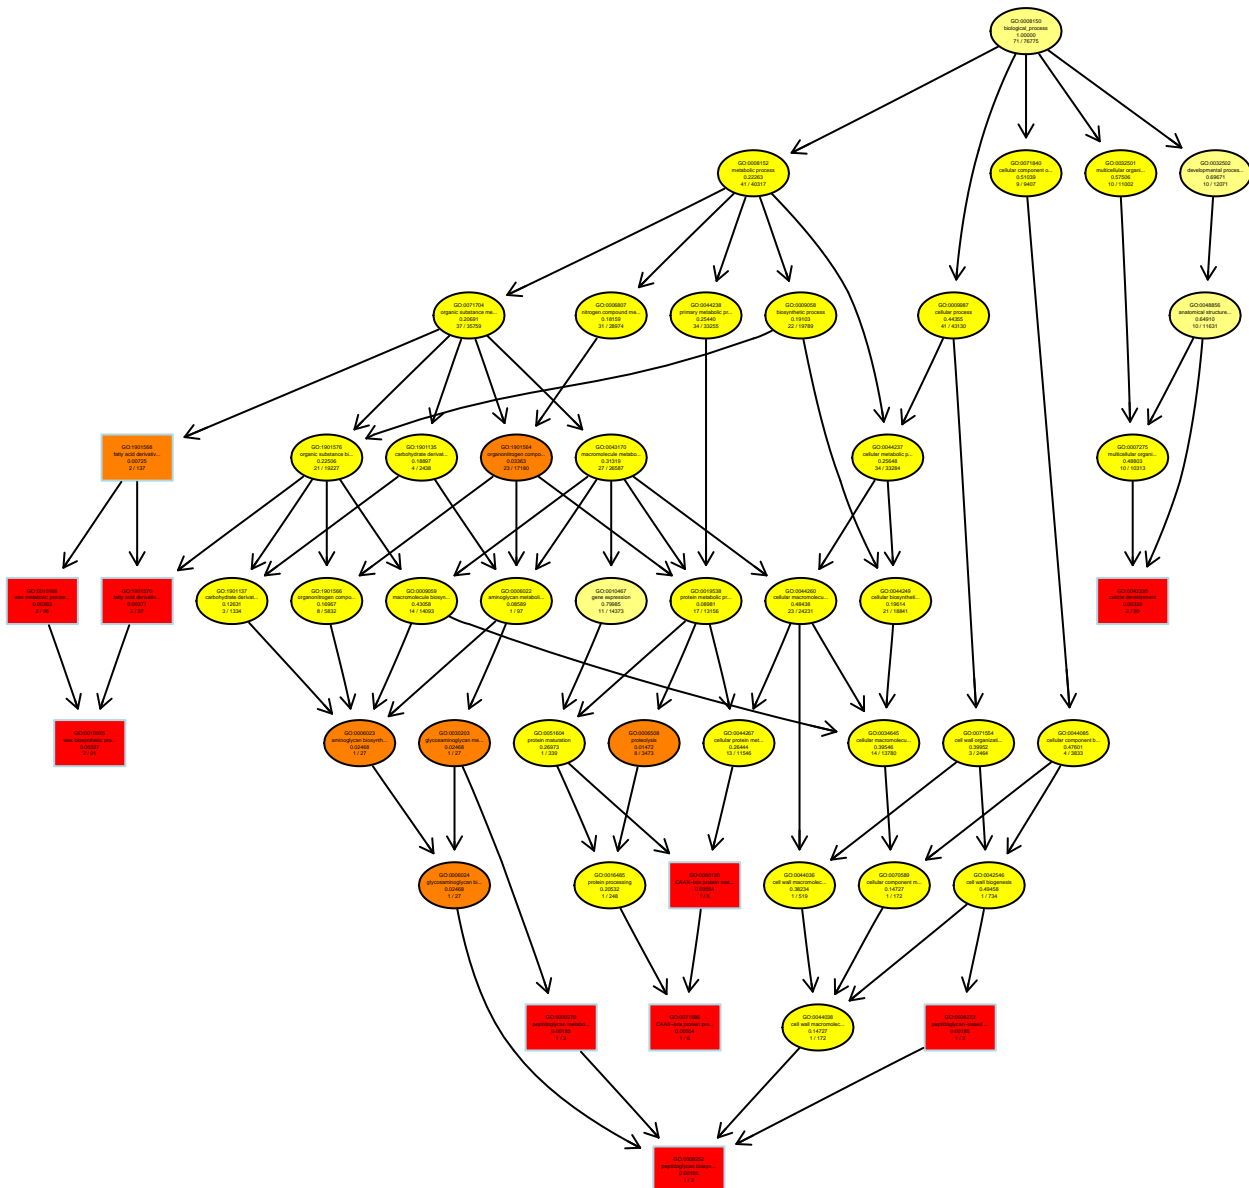

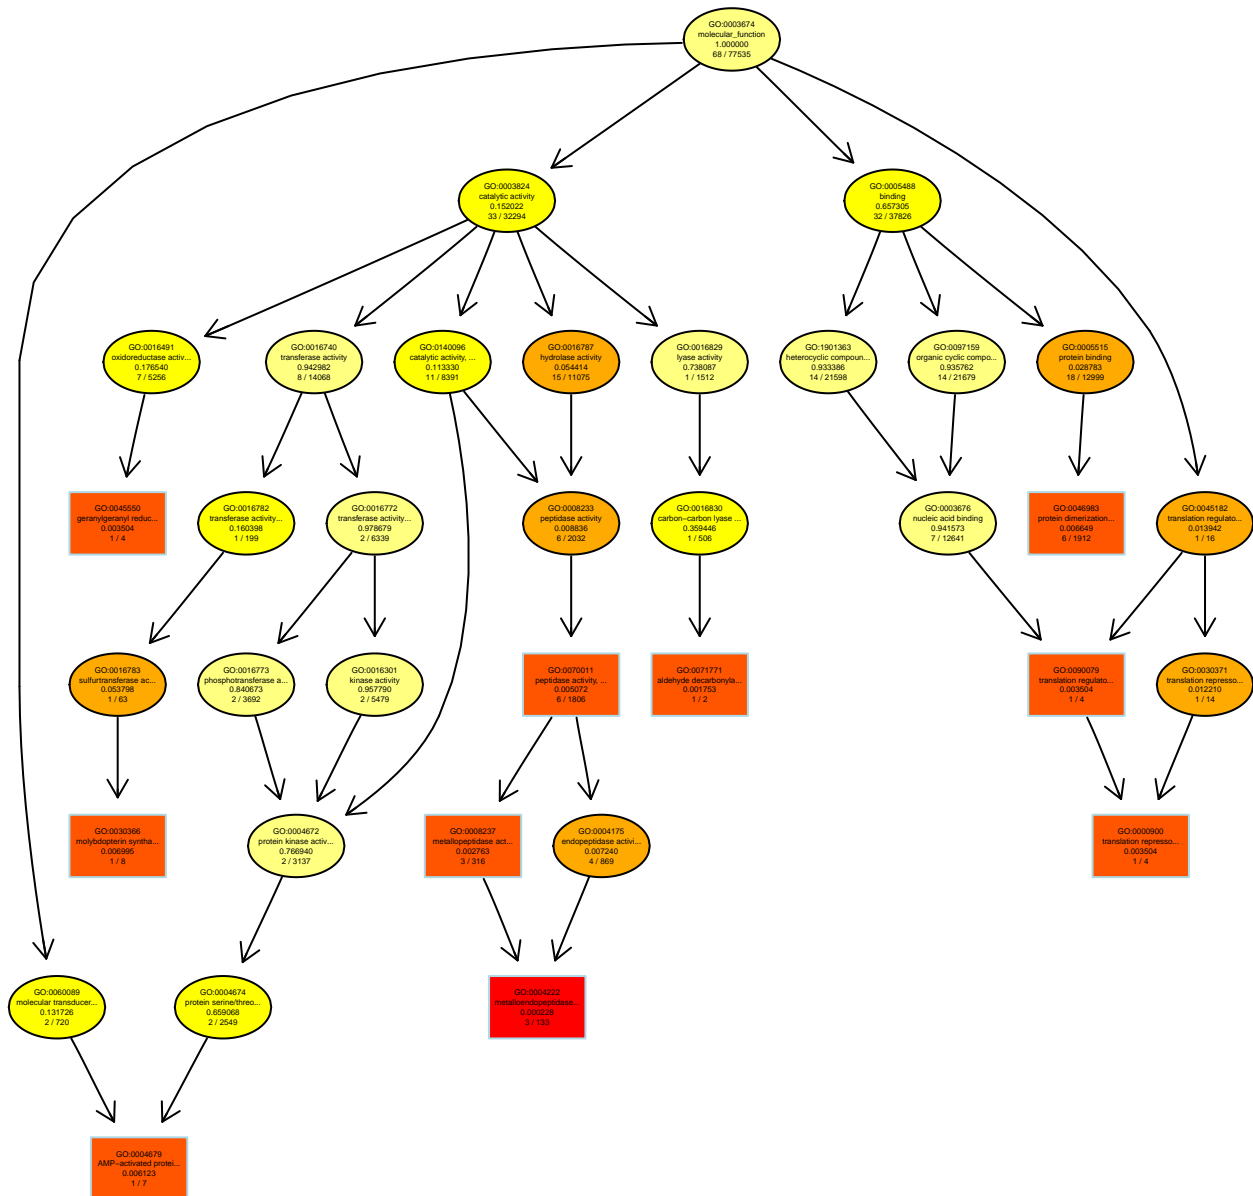

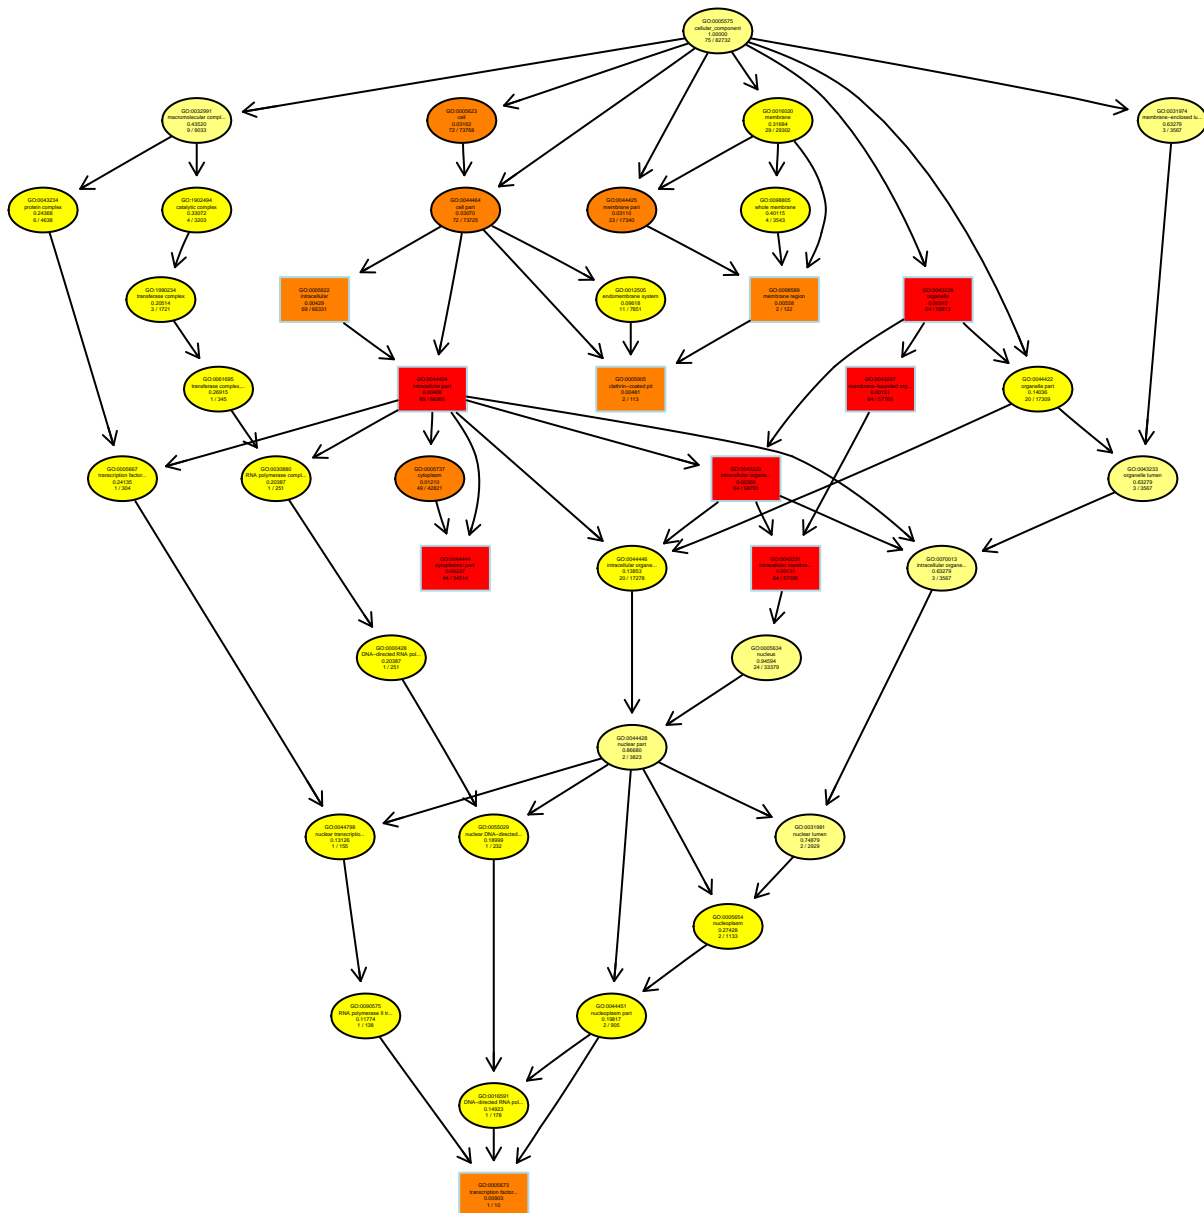

Supplement: s1 [file s1]





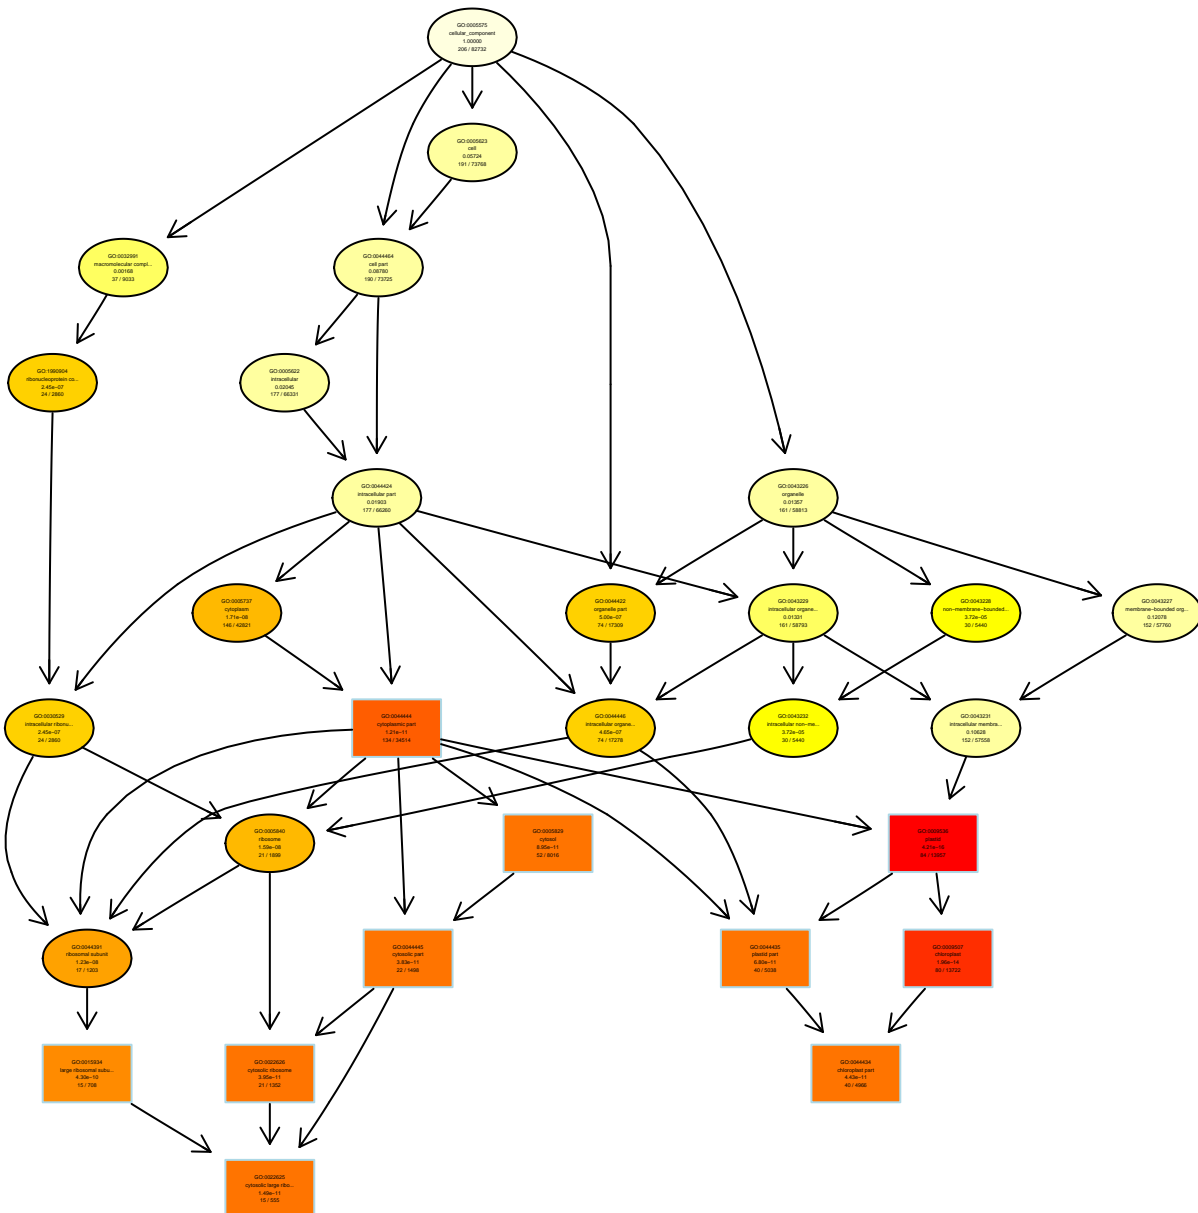

Supplement: s1 [file s1]

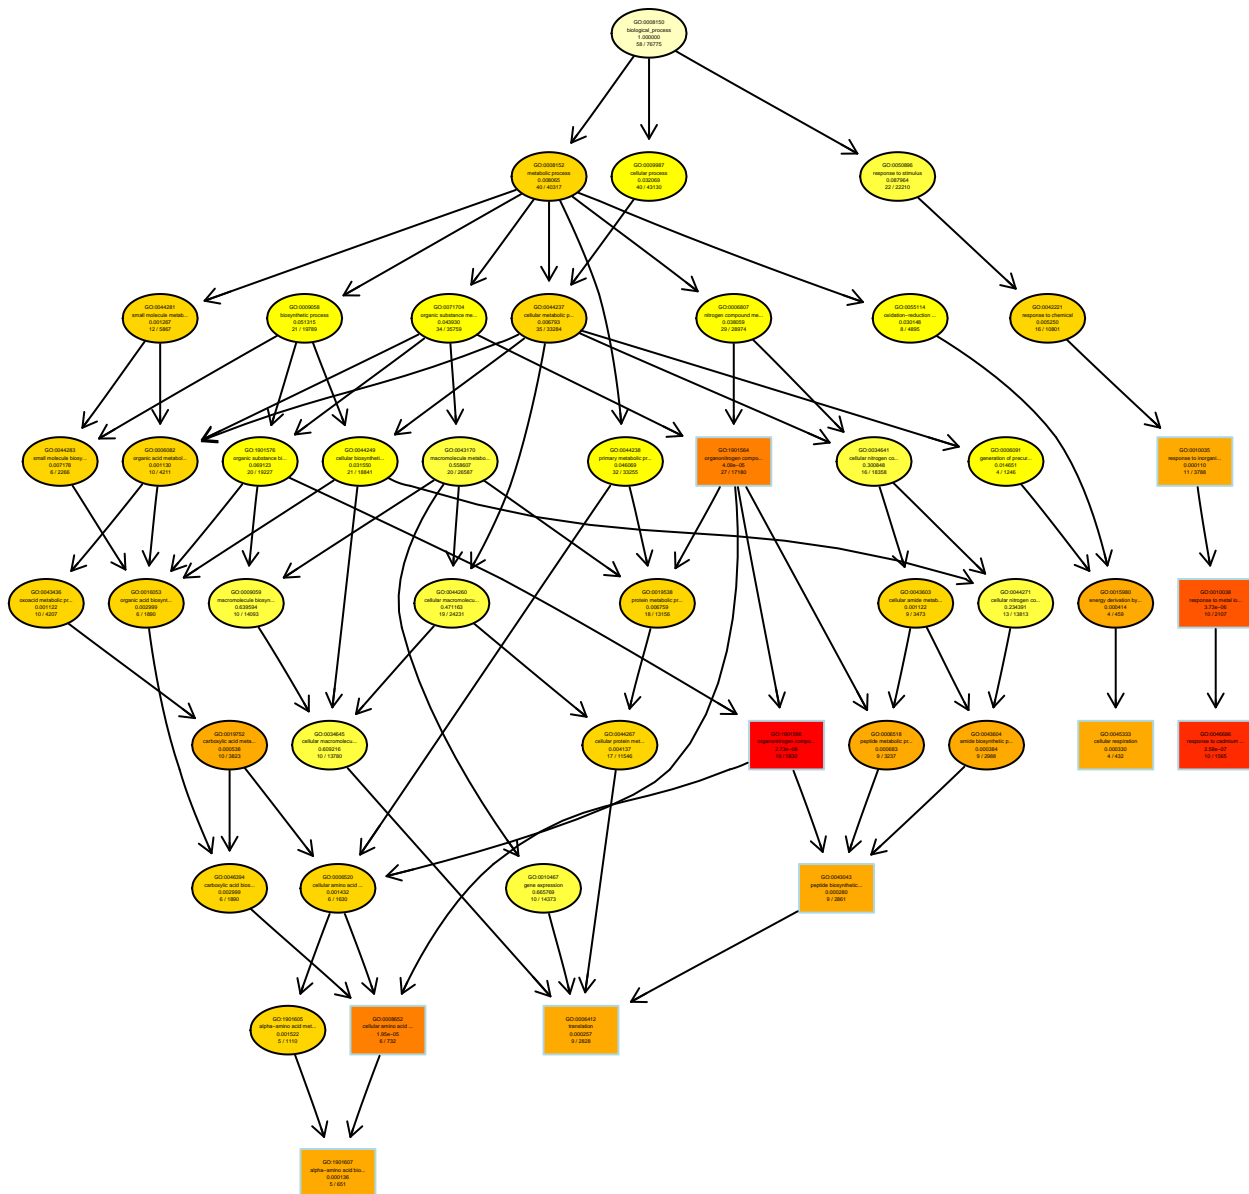

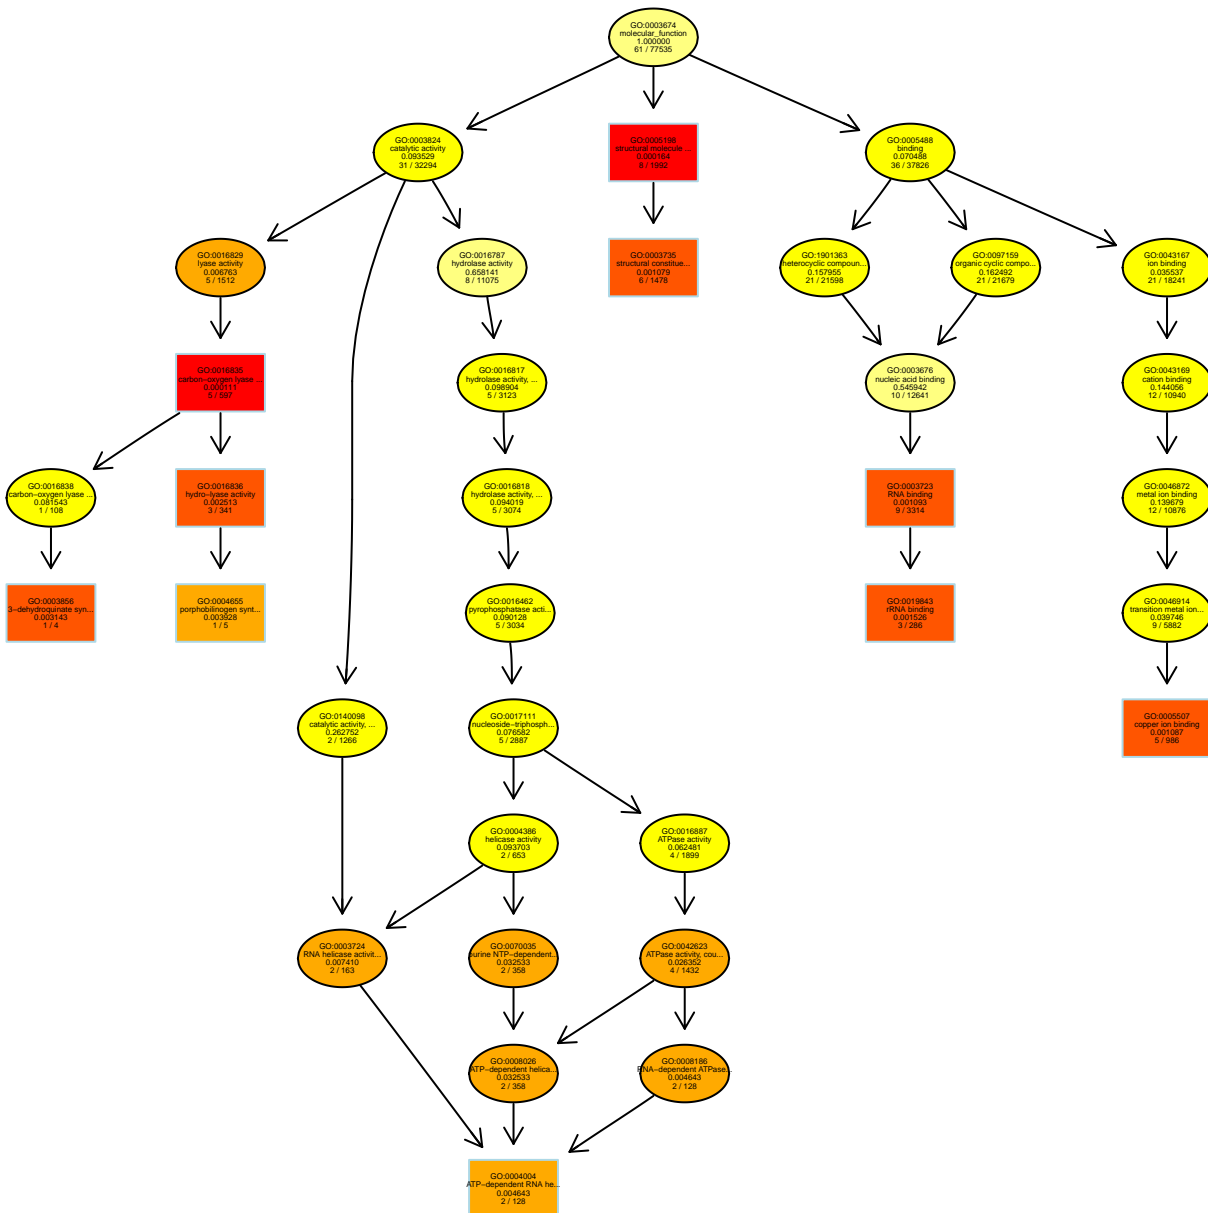

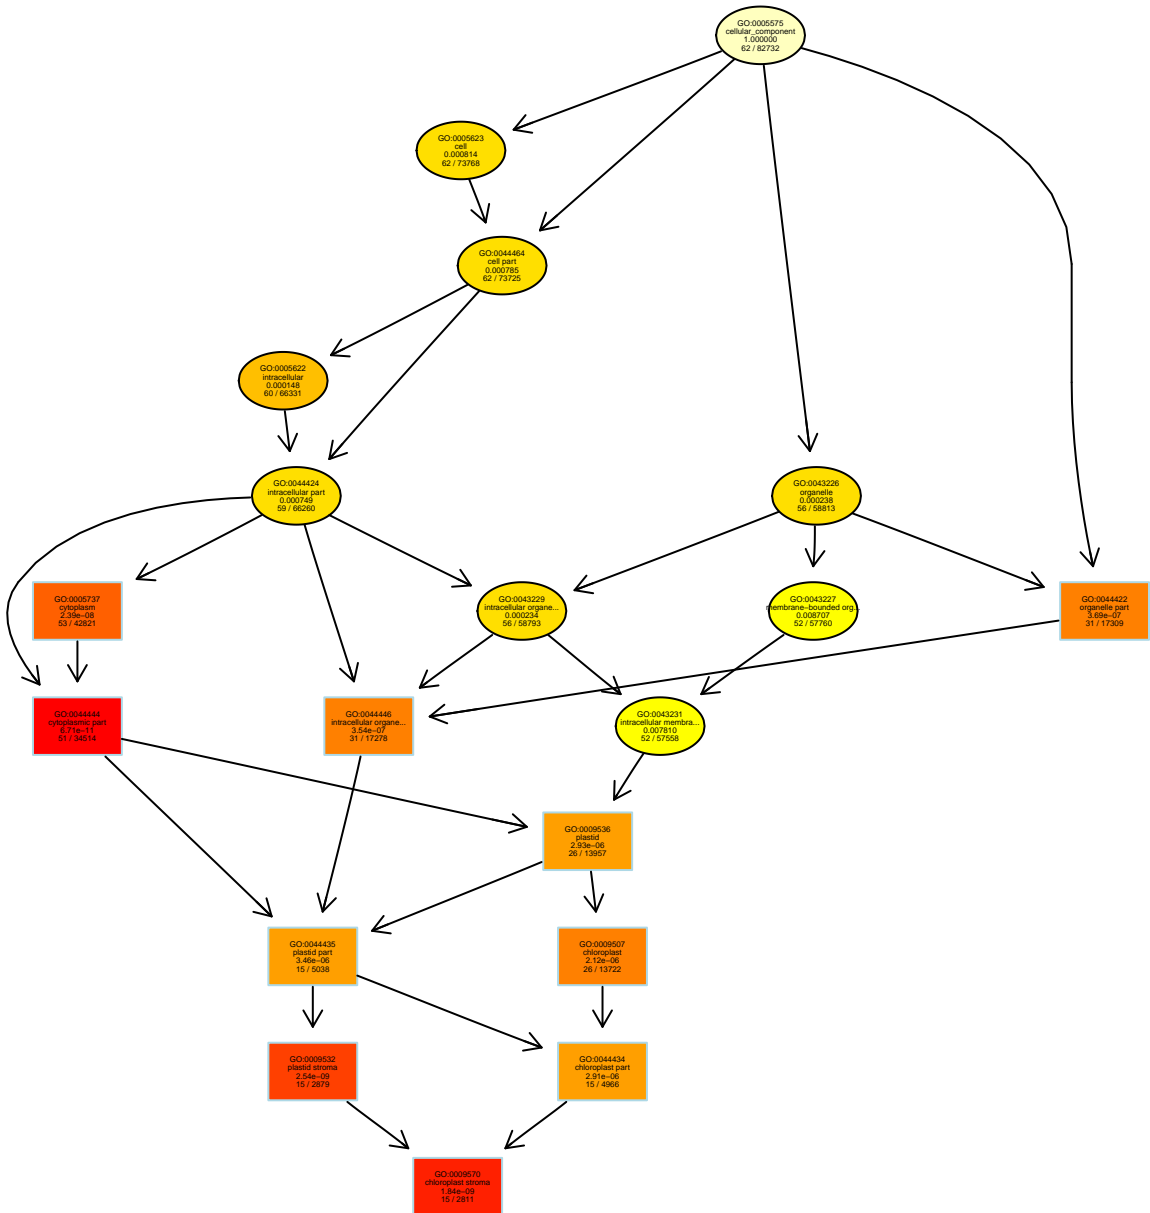

Supplement: s1 [file s1]





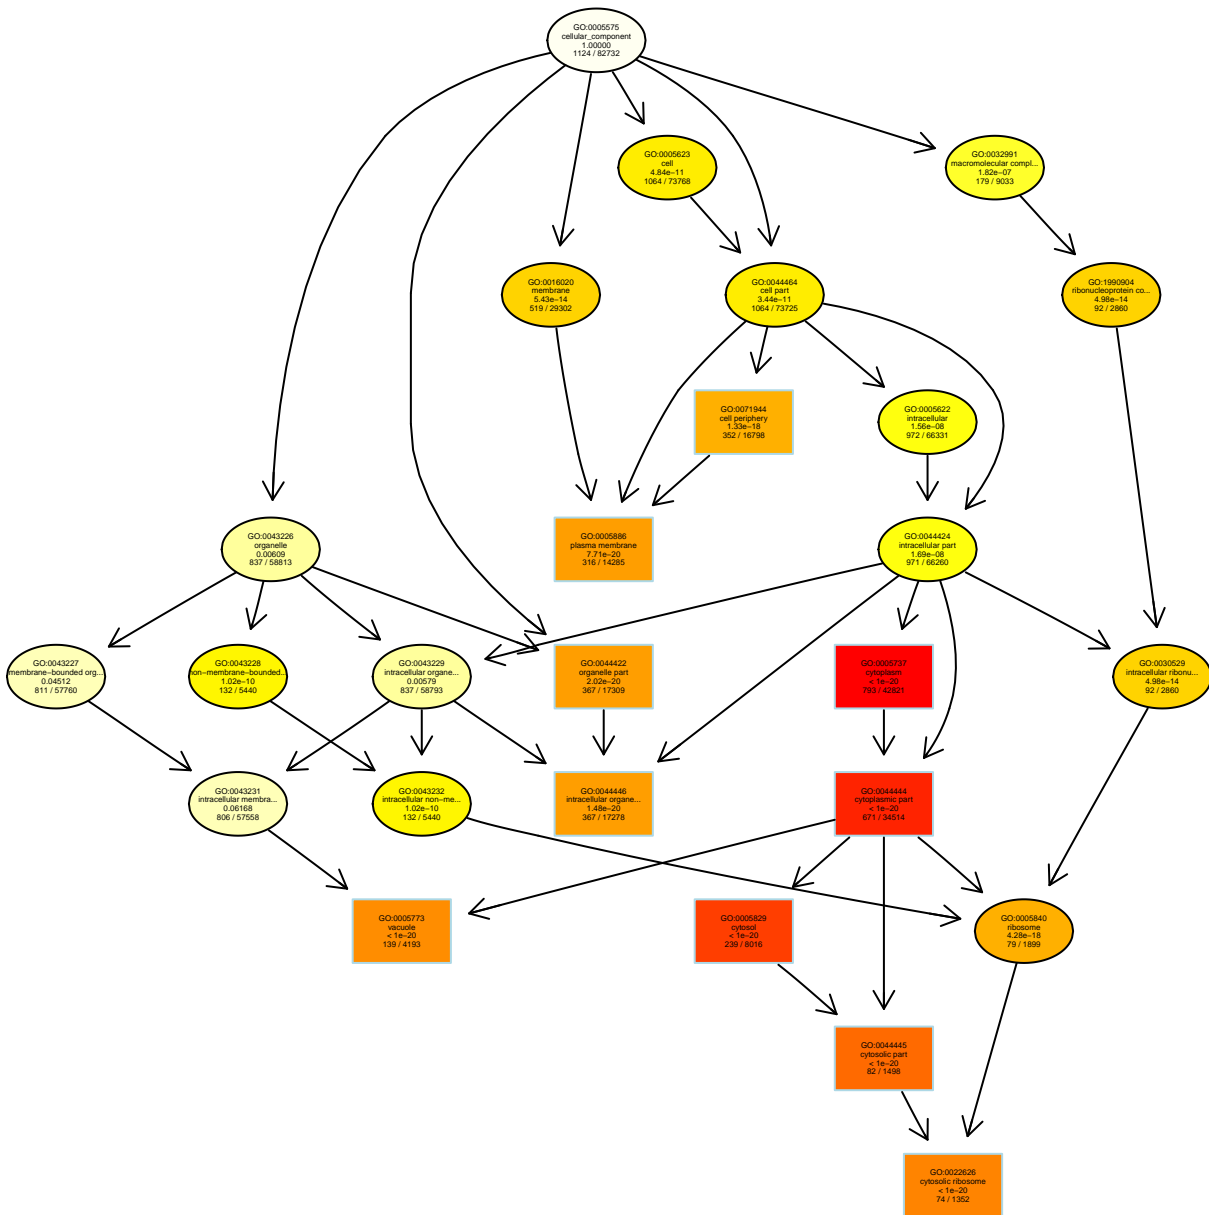

Supplement: s1 [file s1]

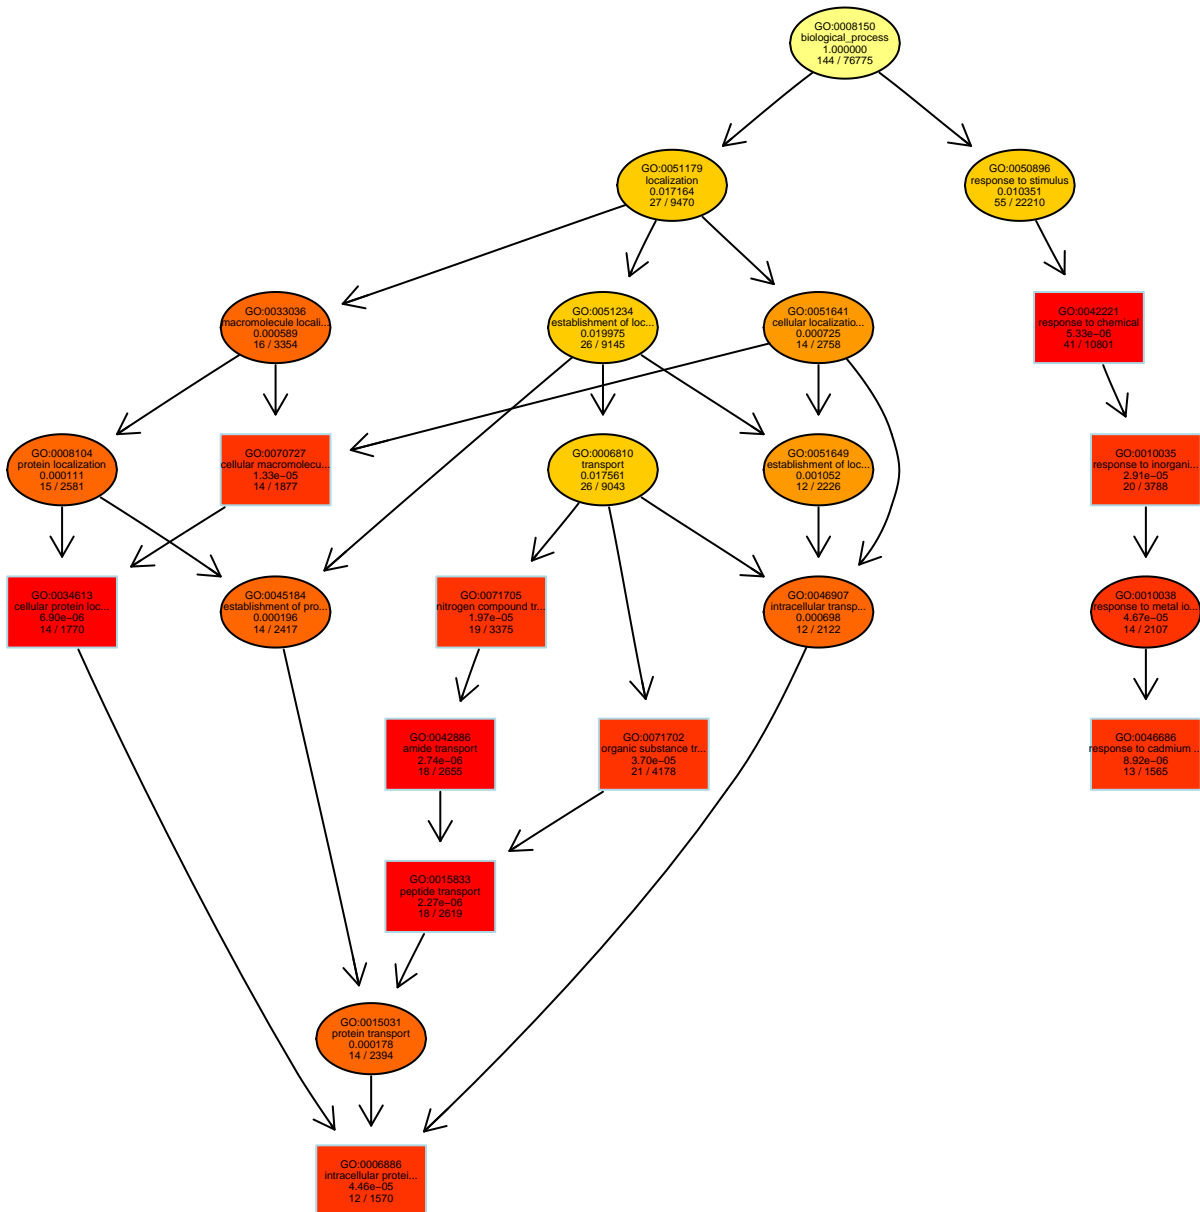

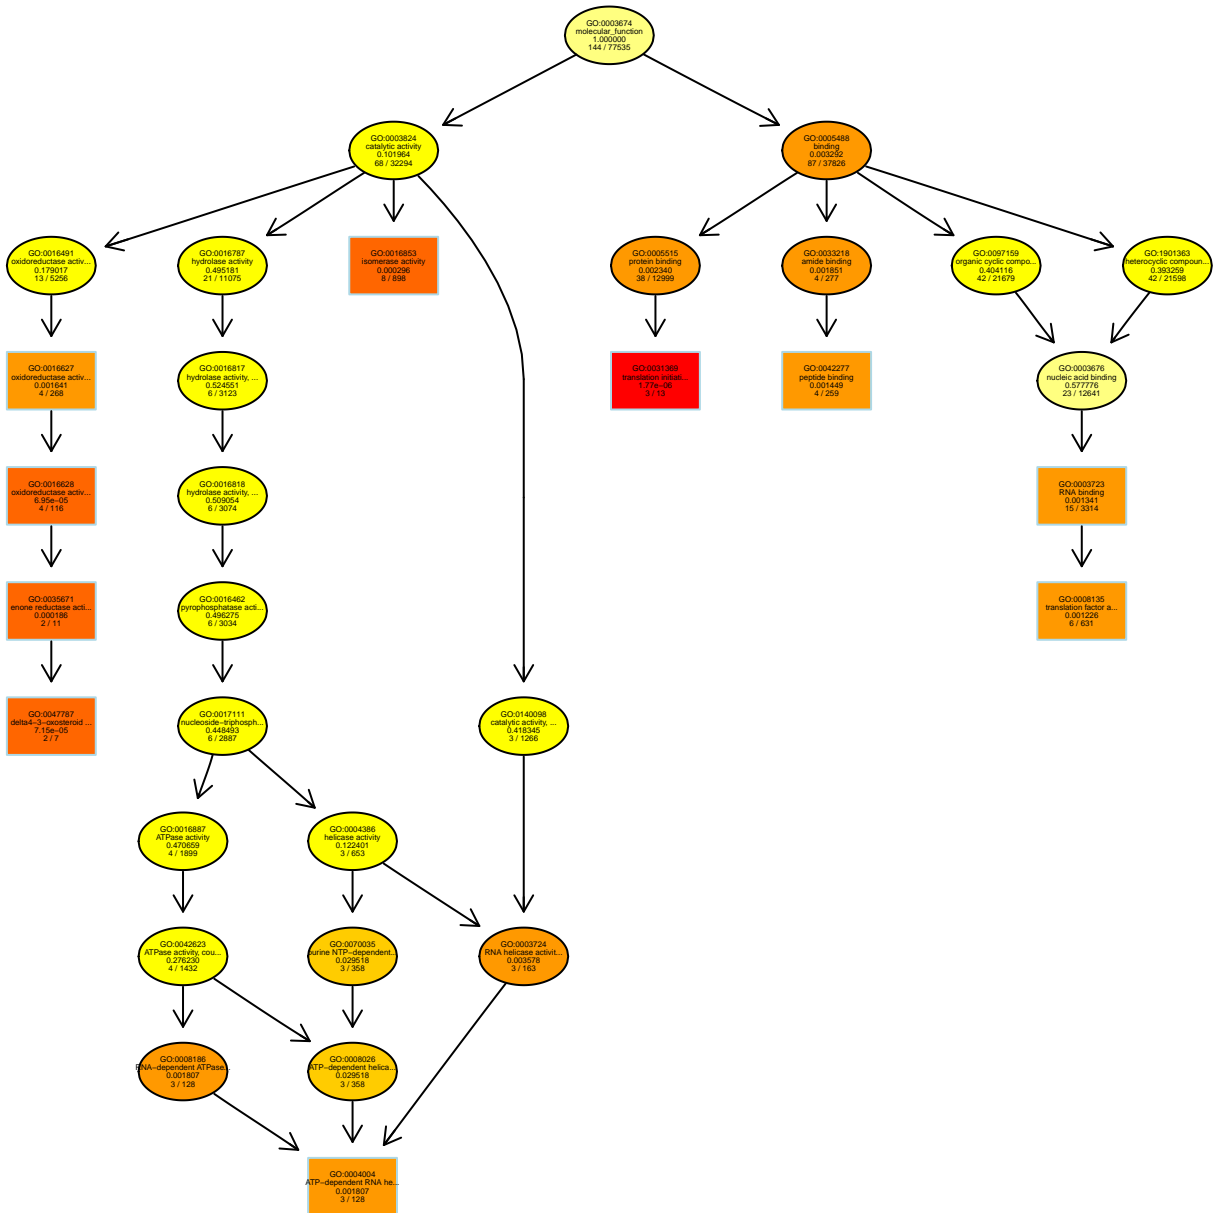

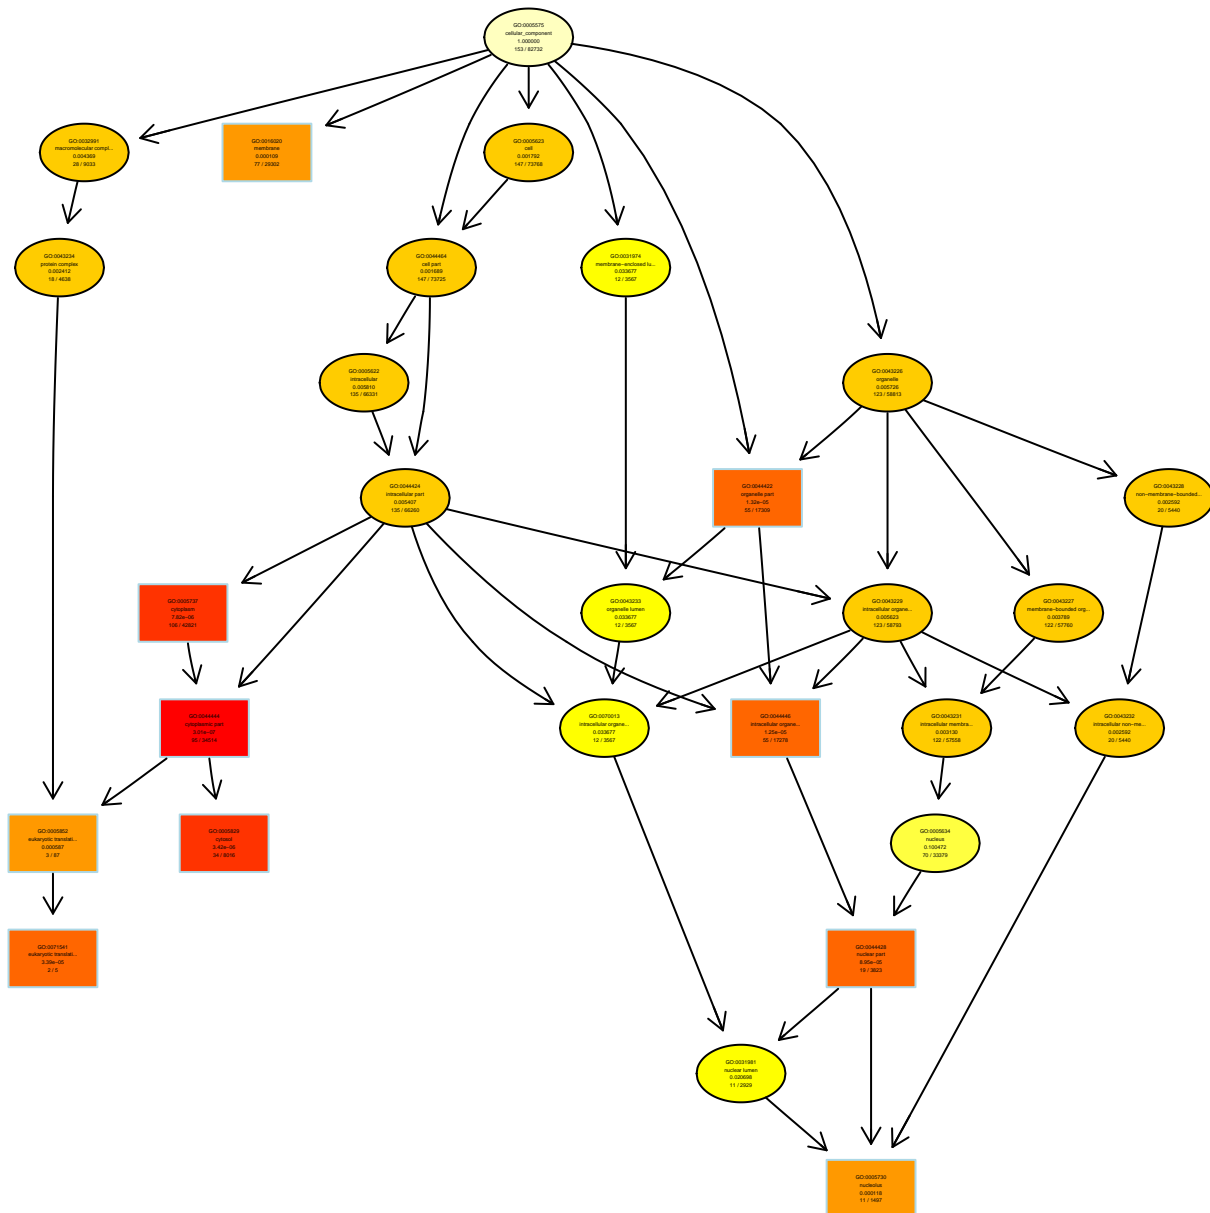

Supplement: s1 [file s1]



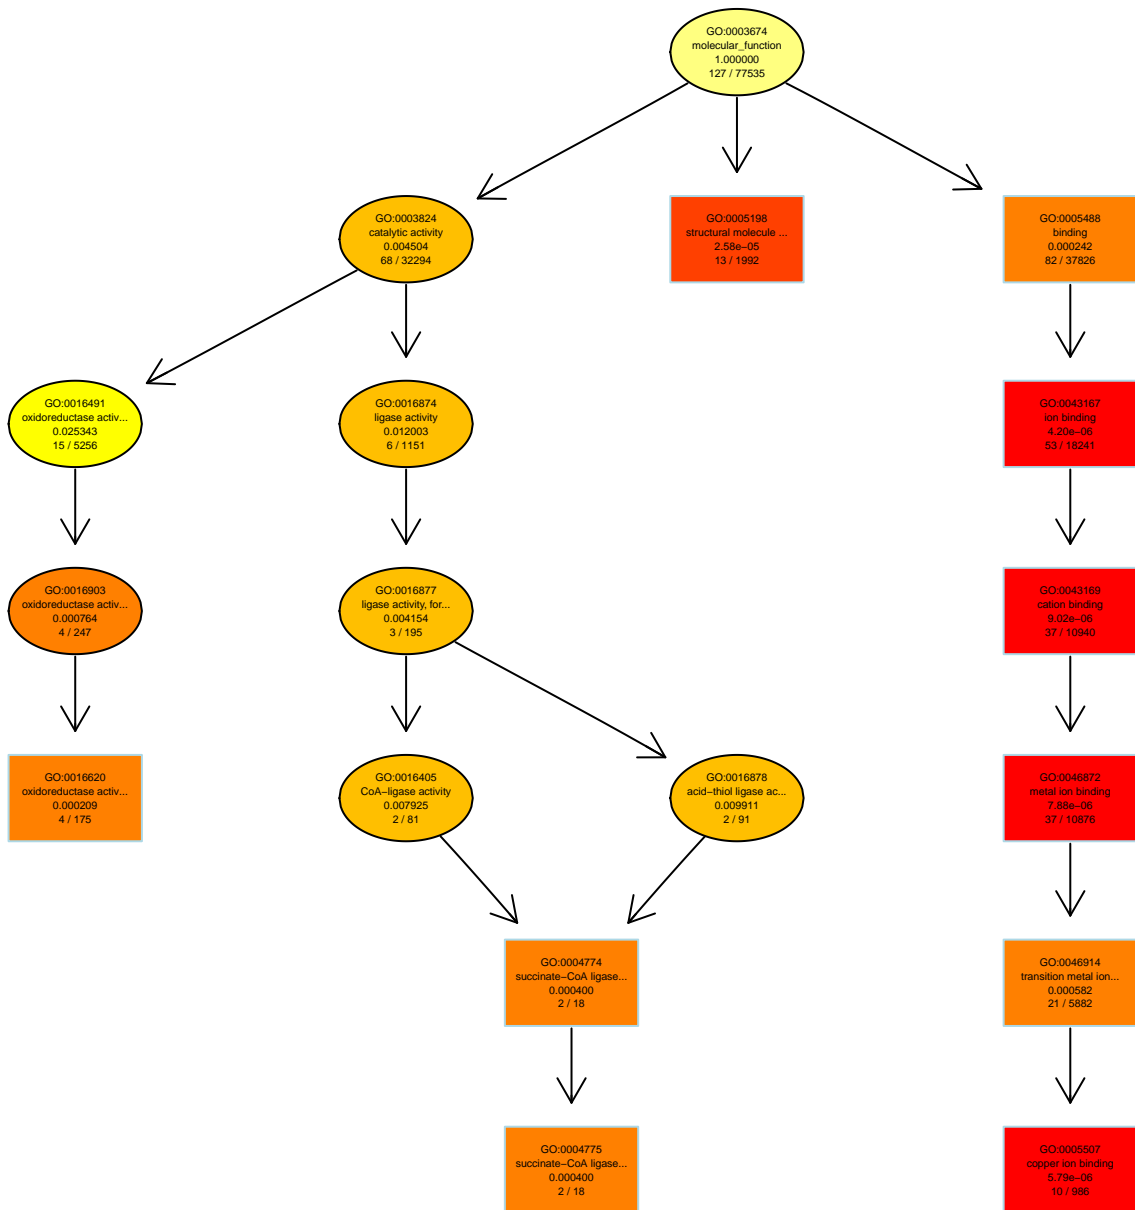



Supplement: s1 [file s1]

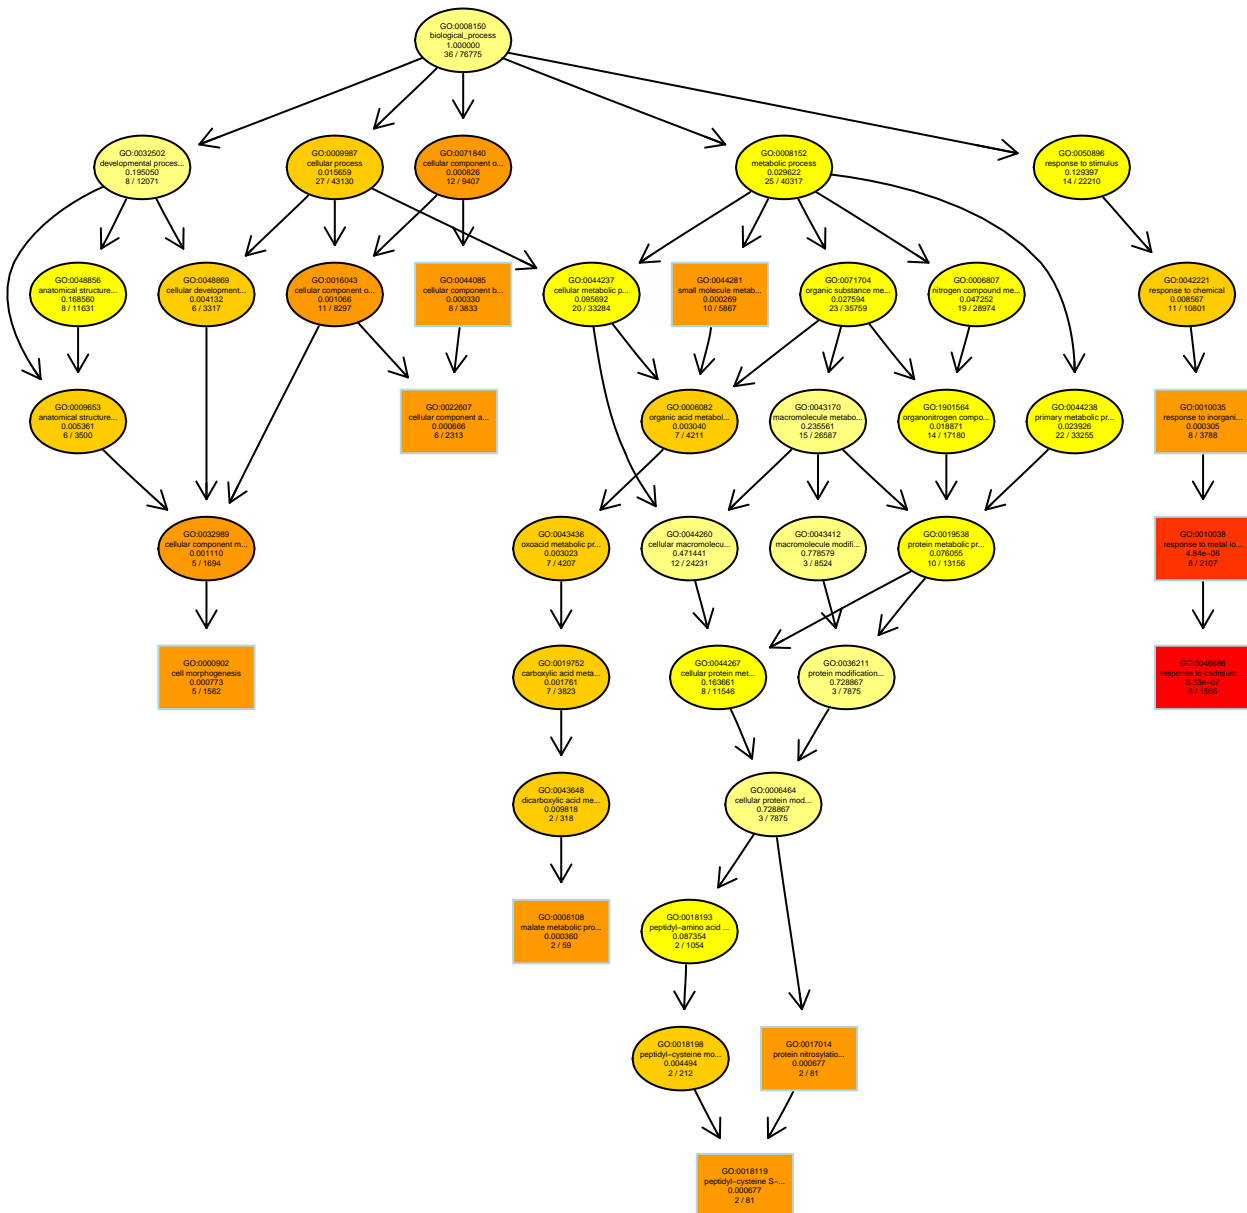

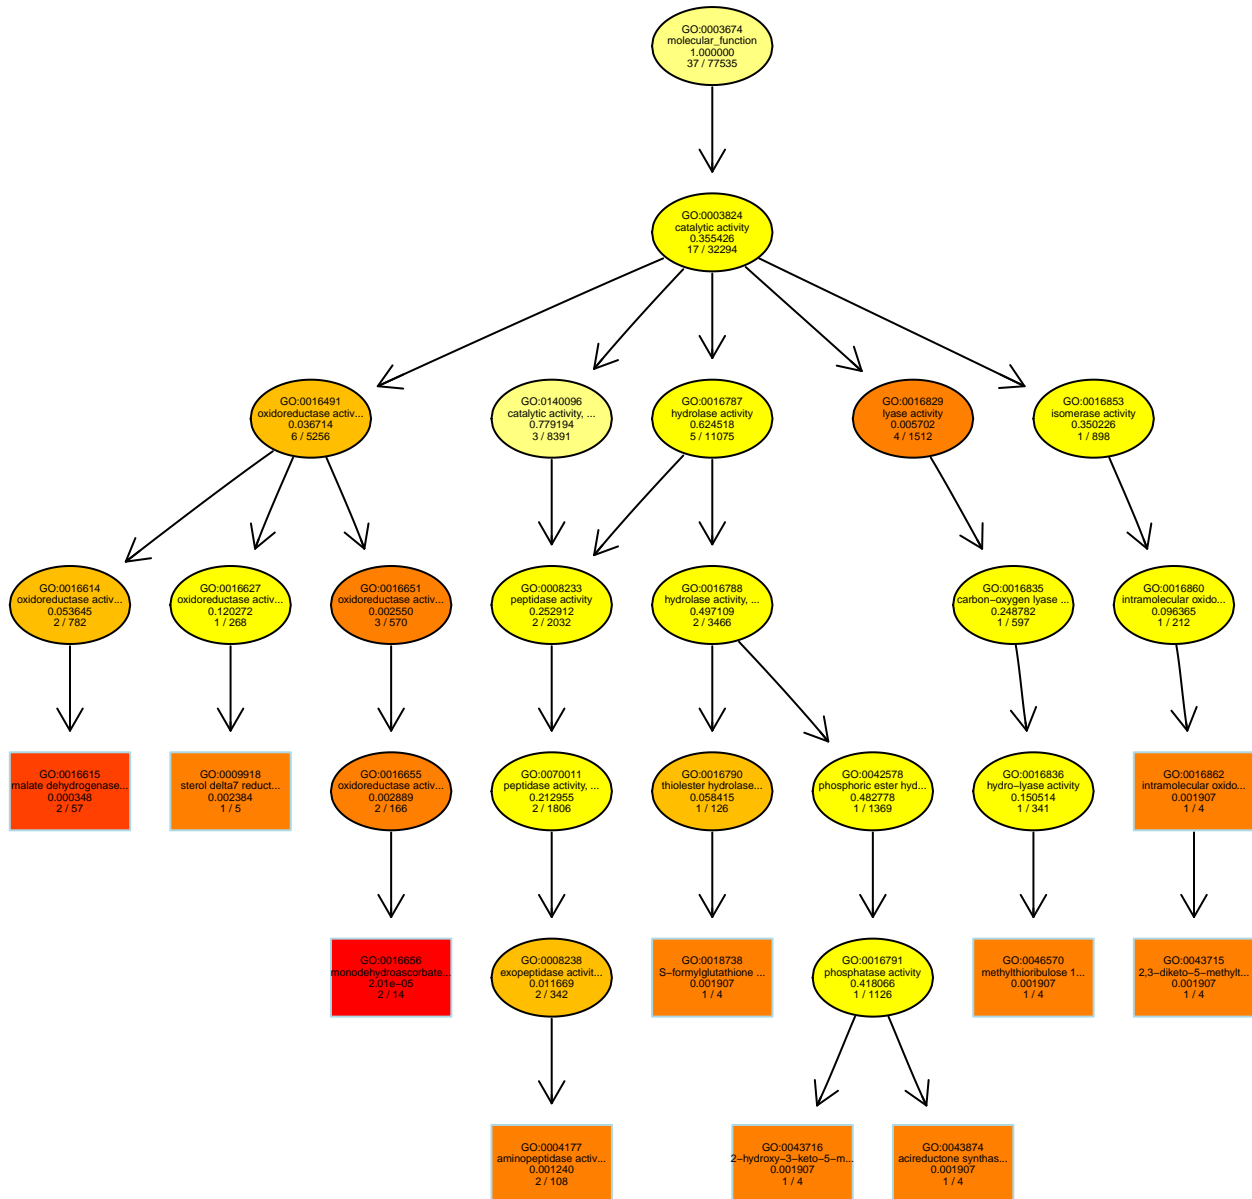

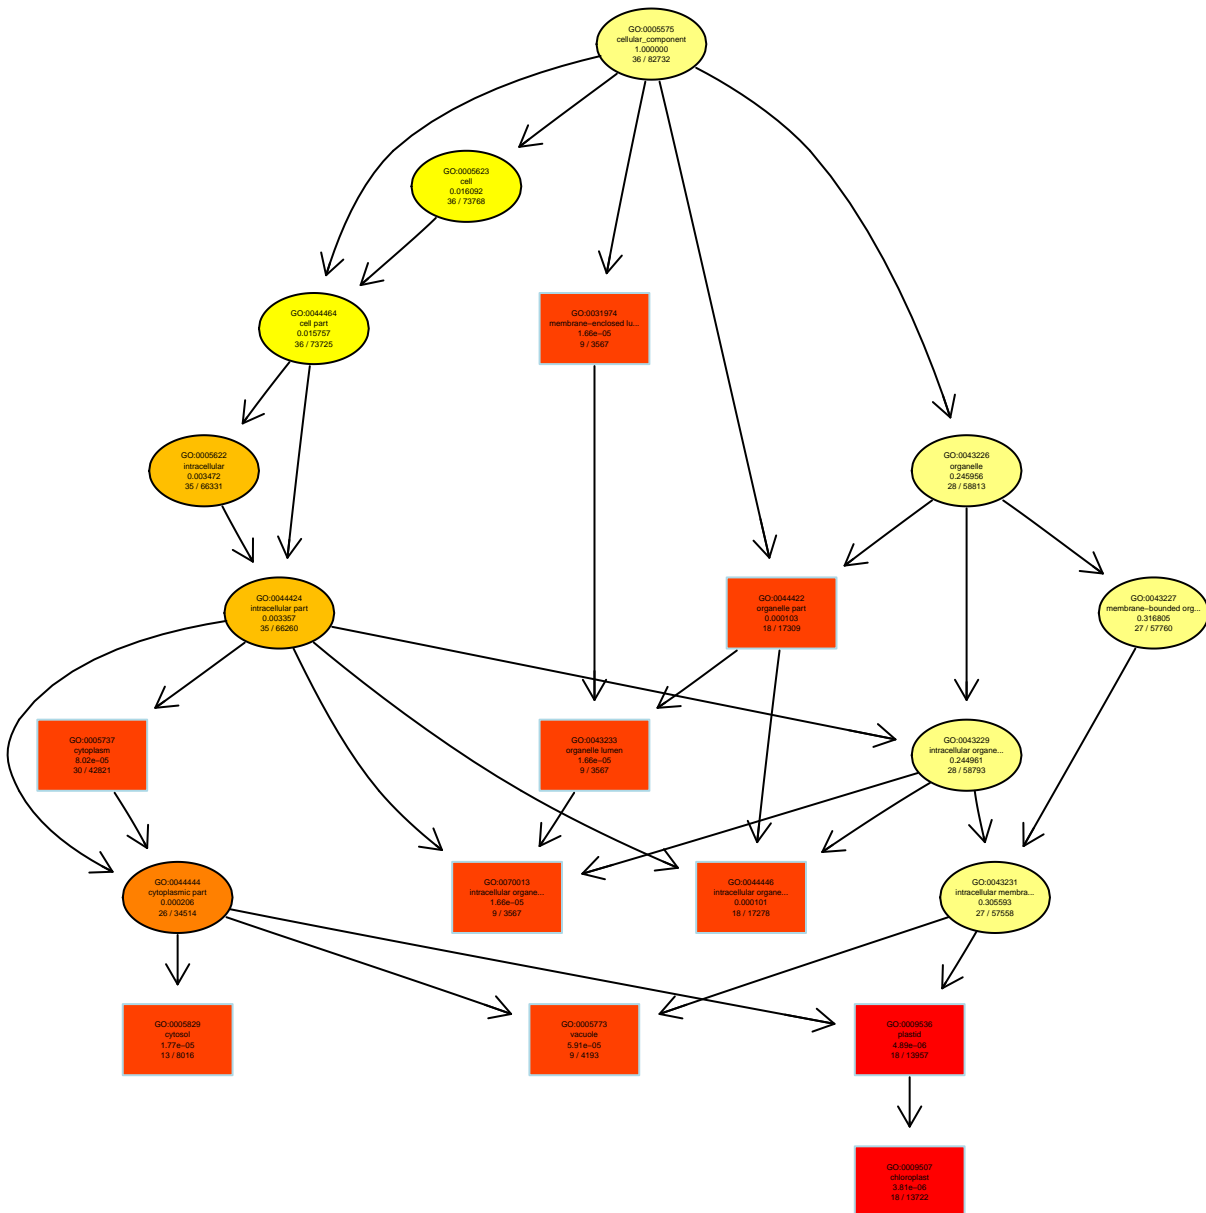

Supplement: s1 [file s1]

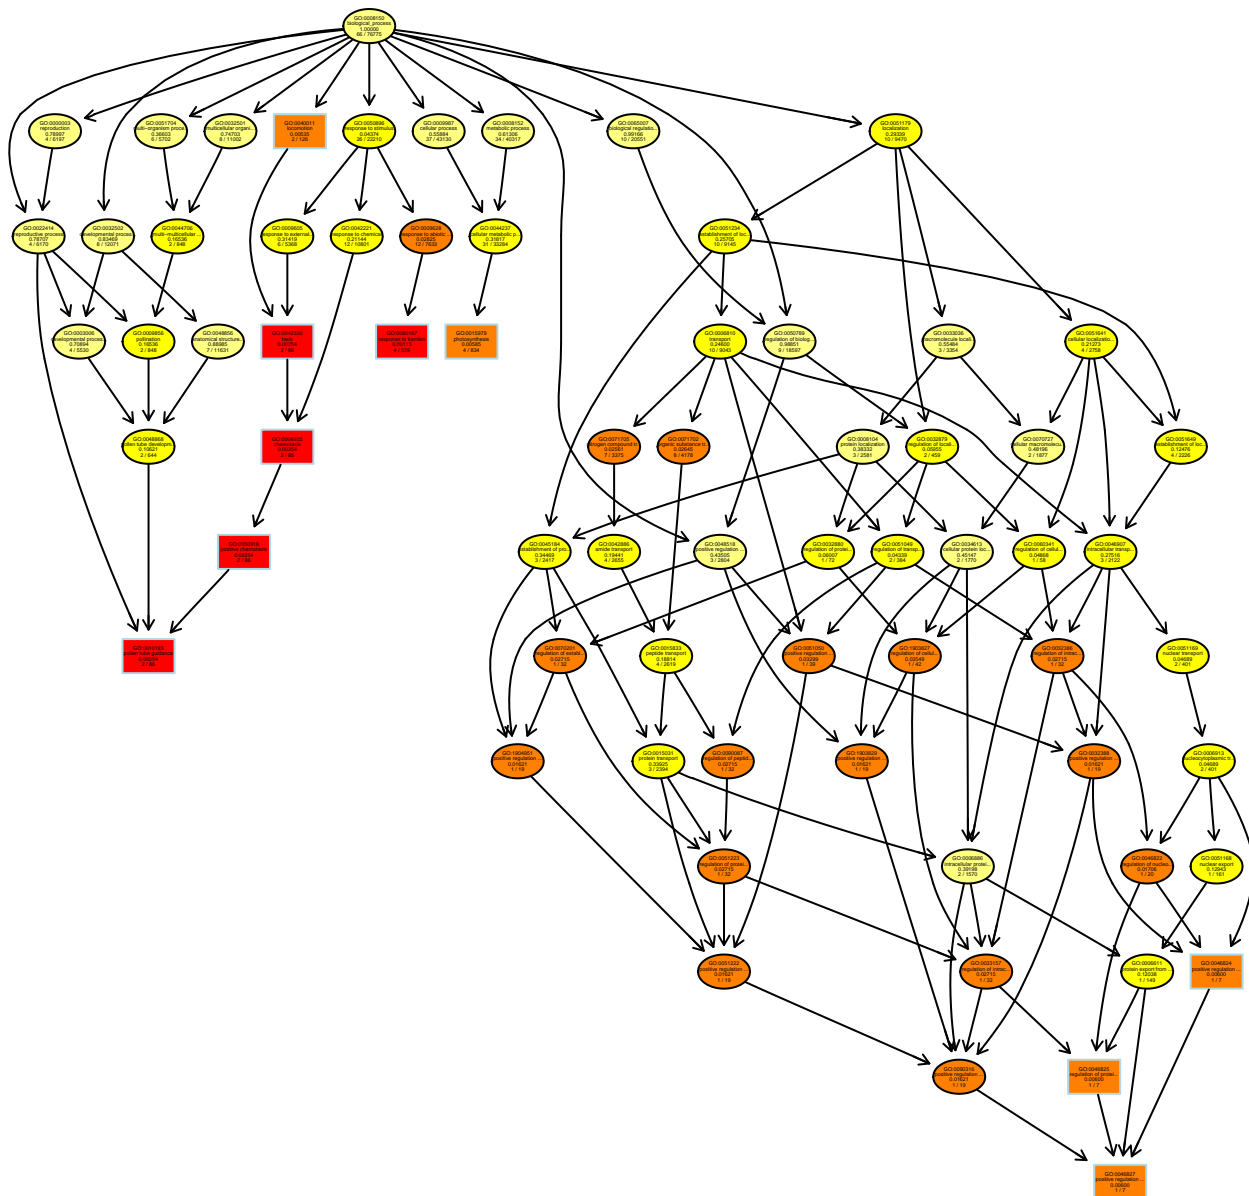

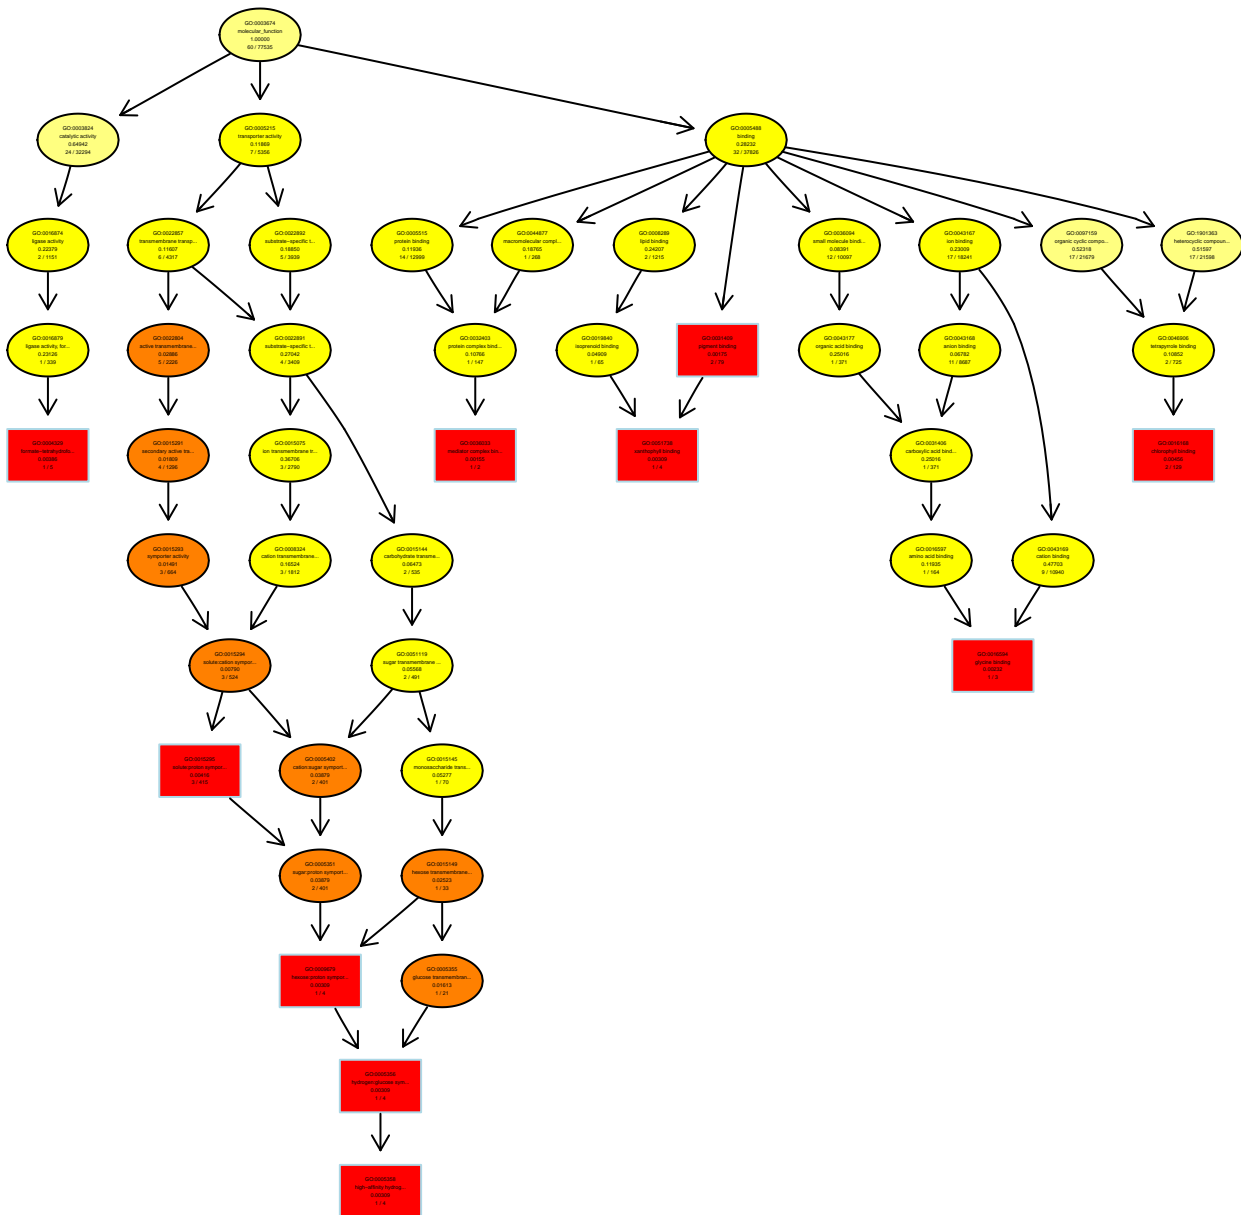

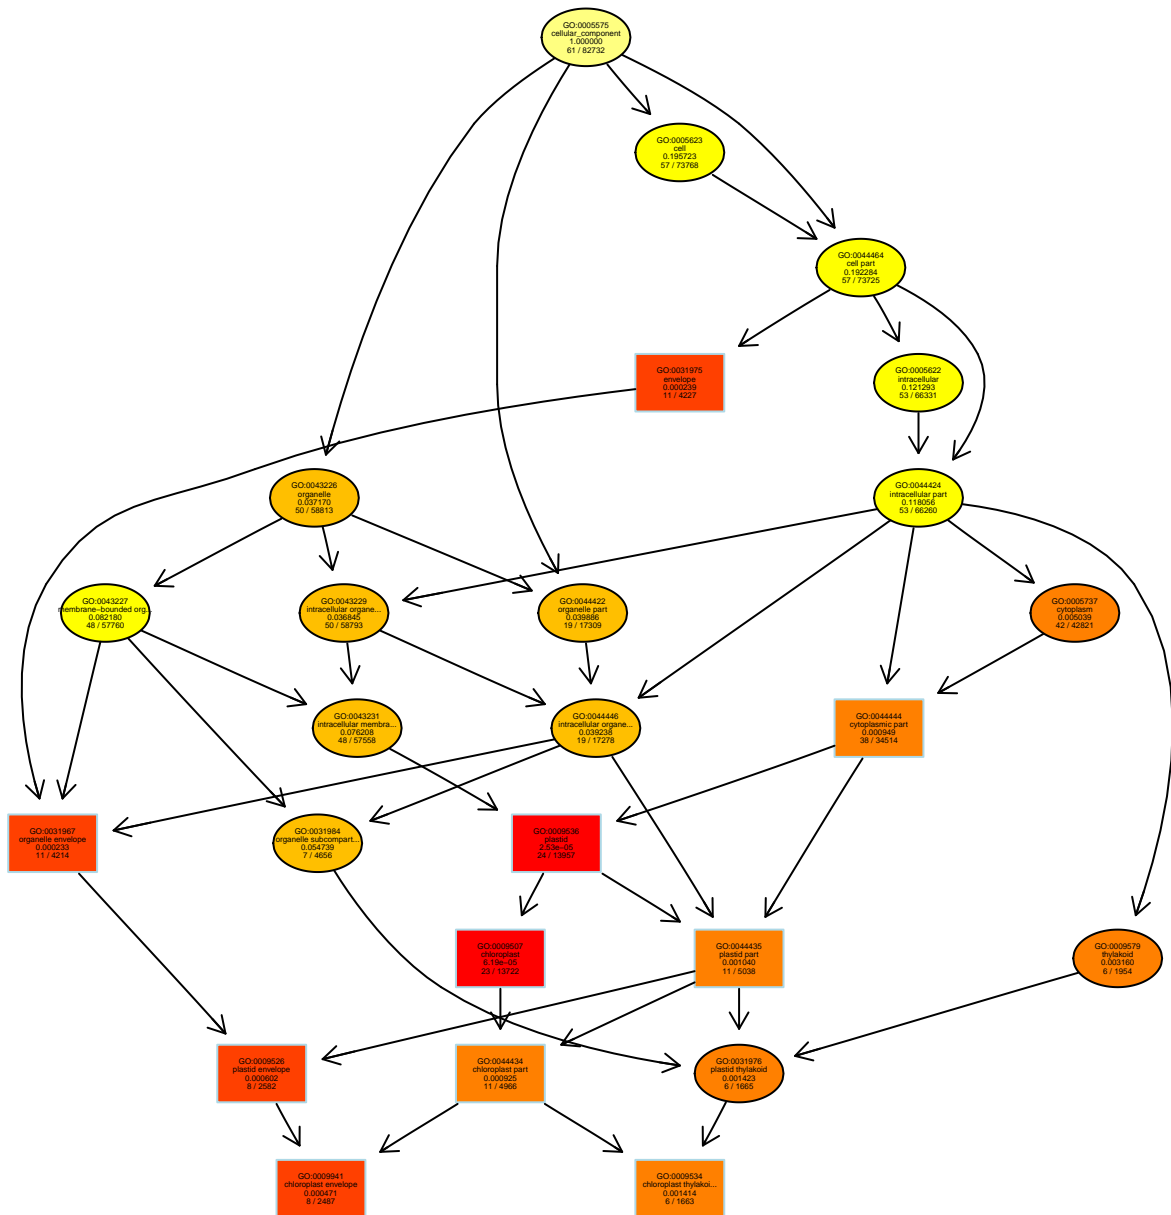

Supplement: s1 [file s1]

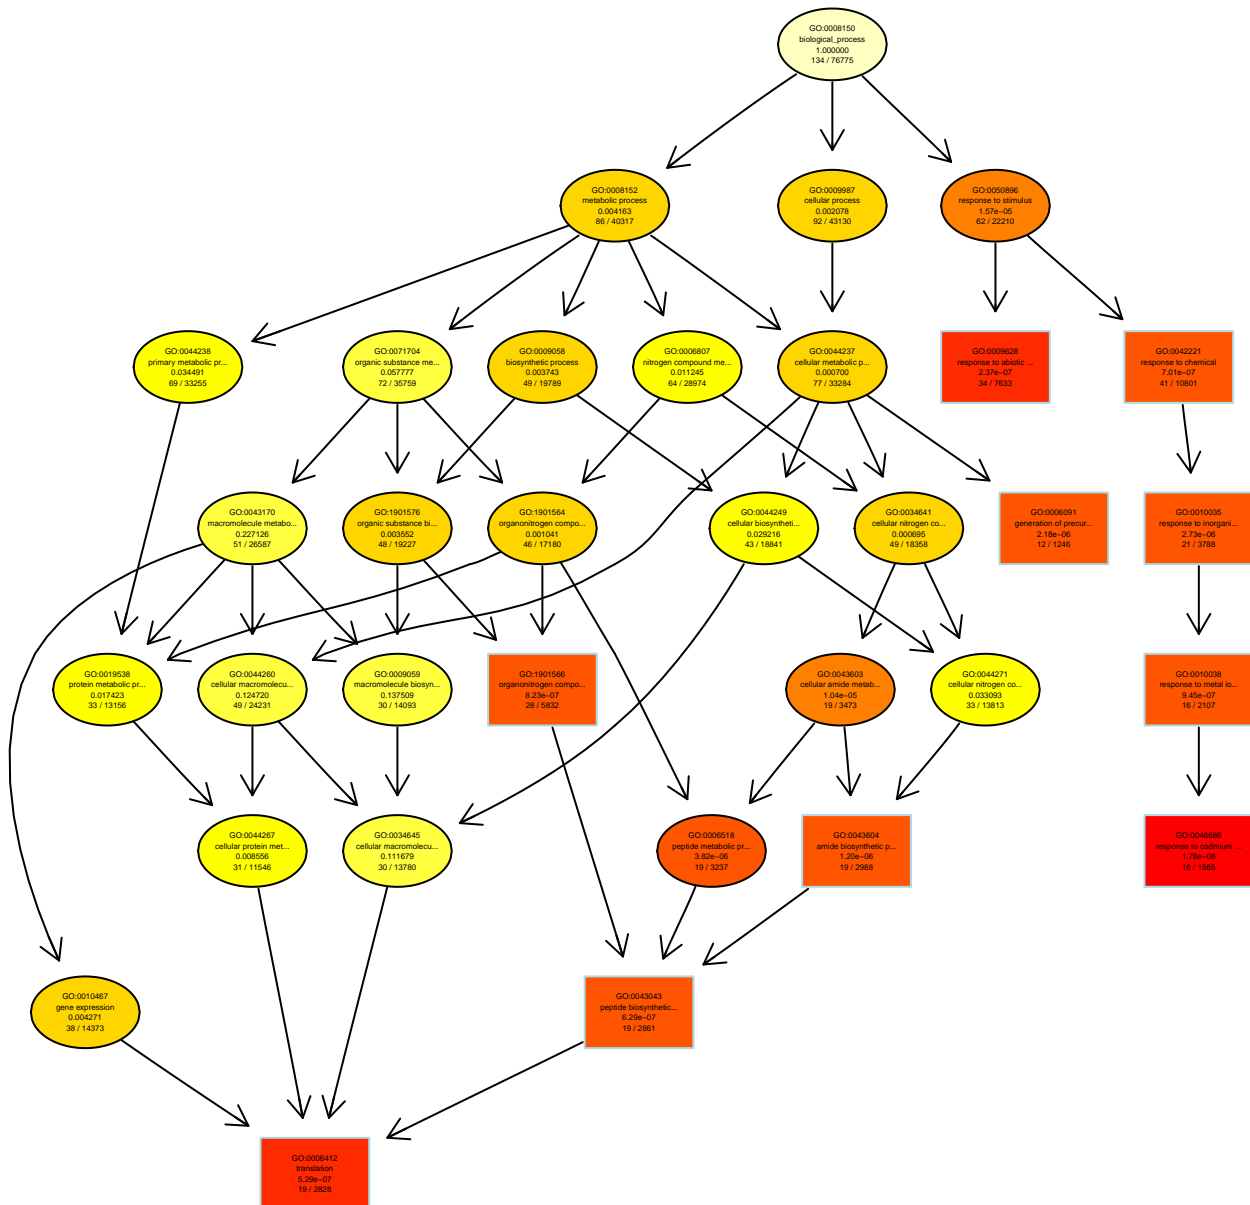

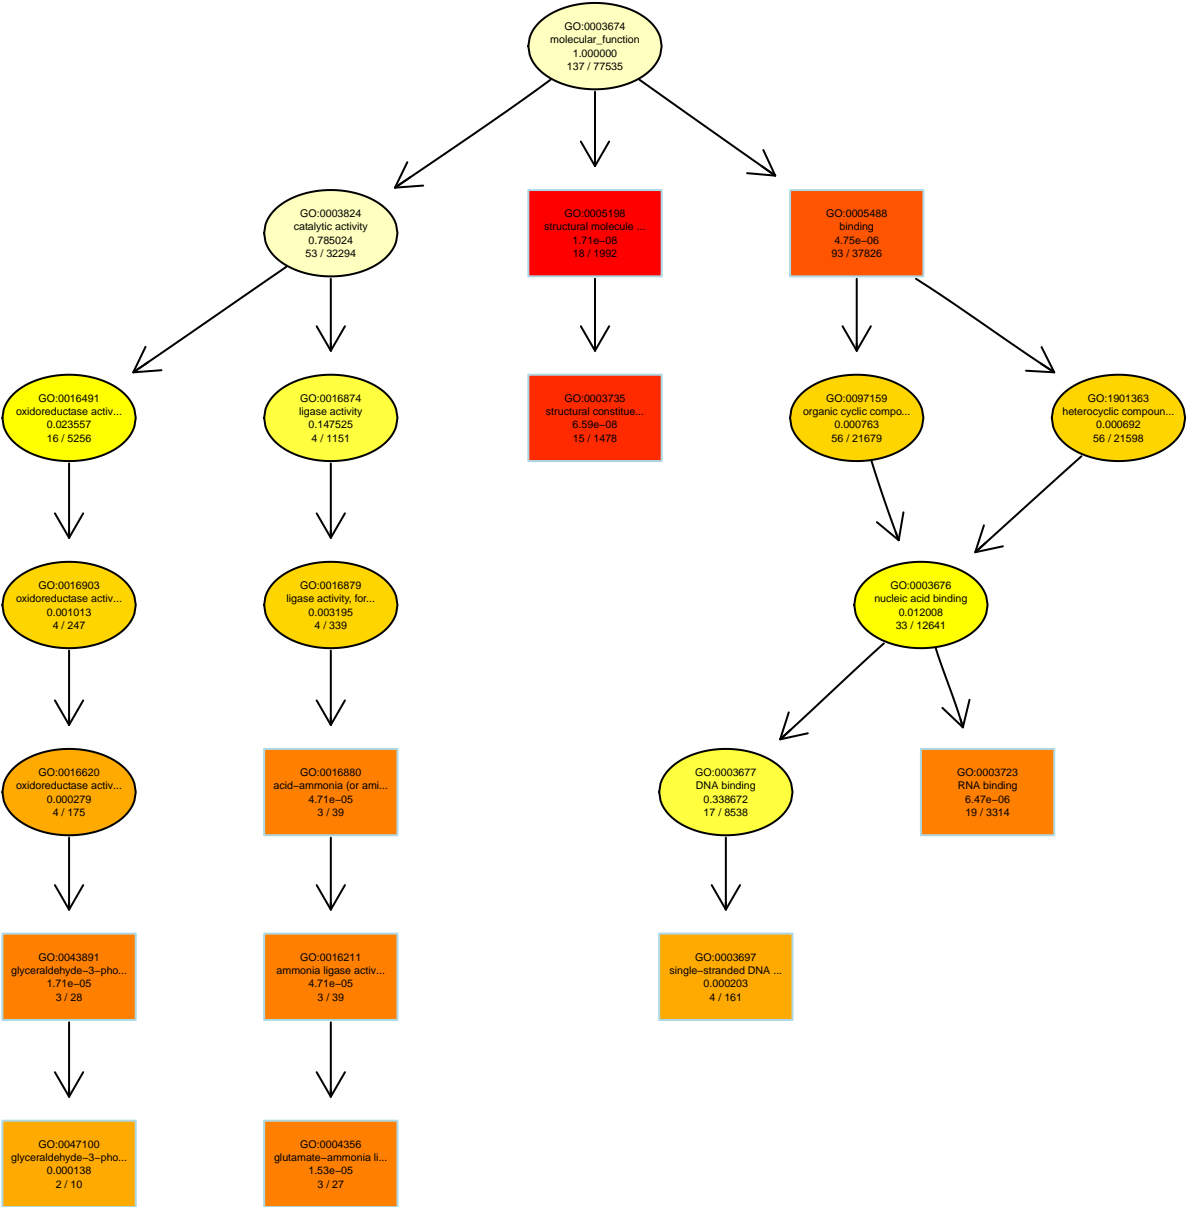

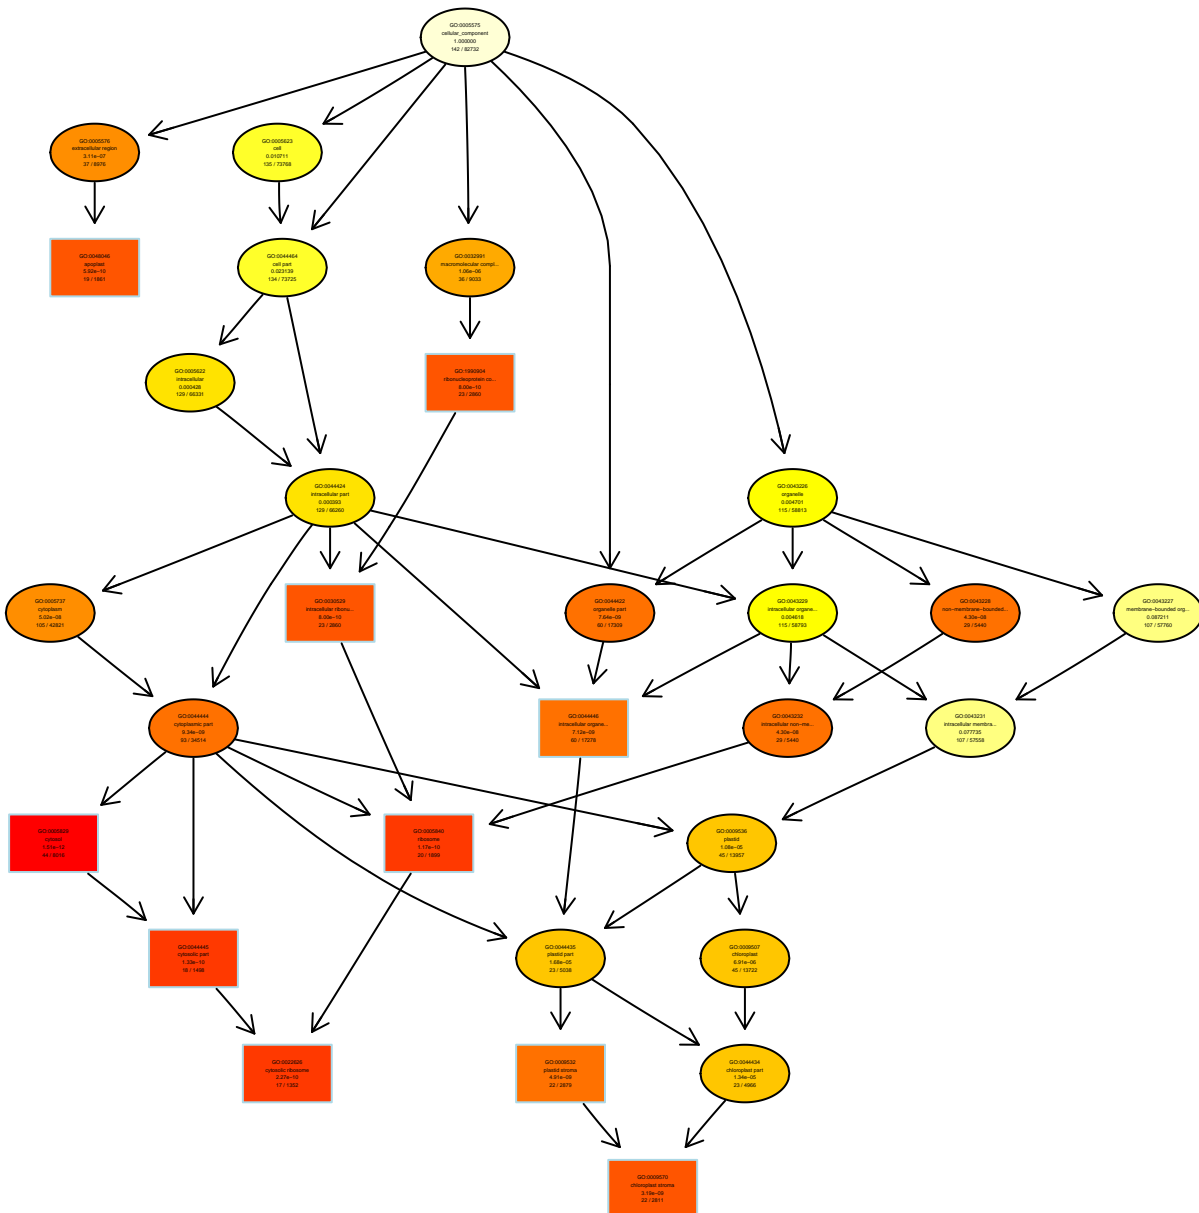

Supplement: s1 [file s1]

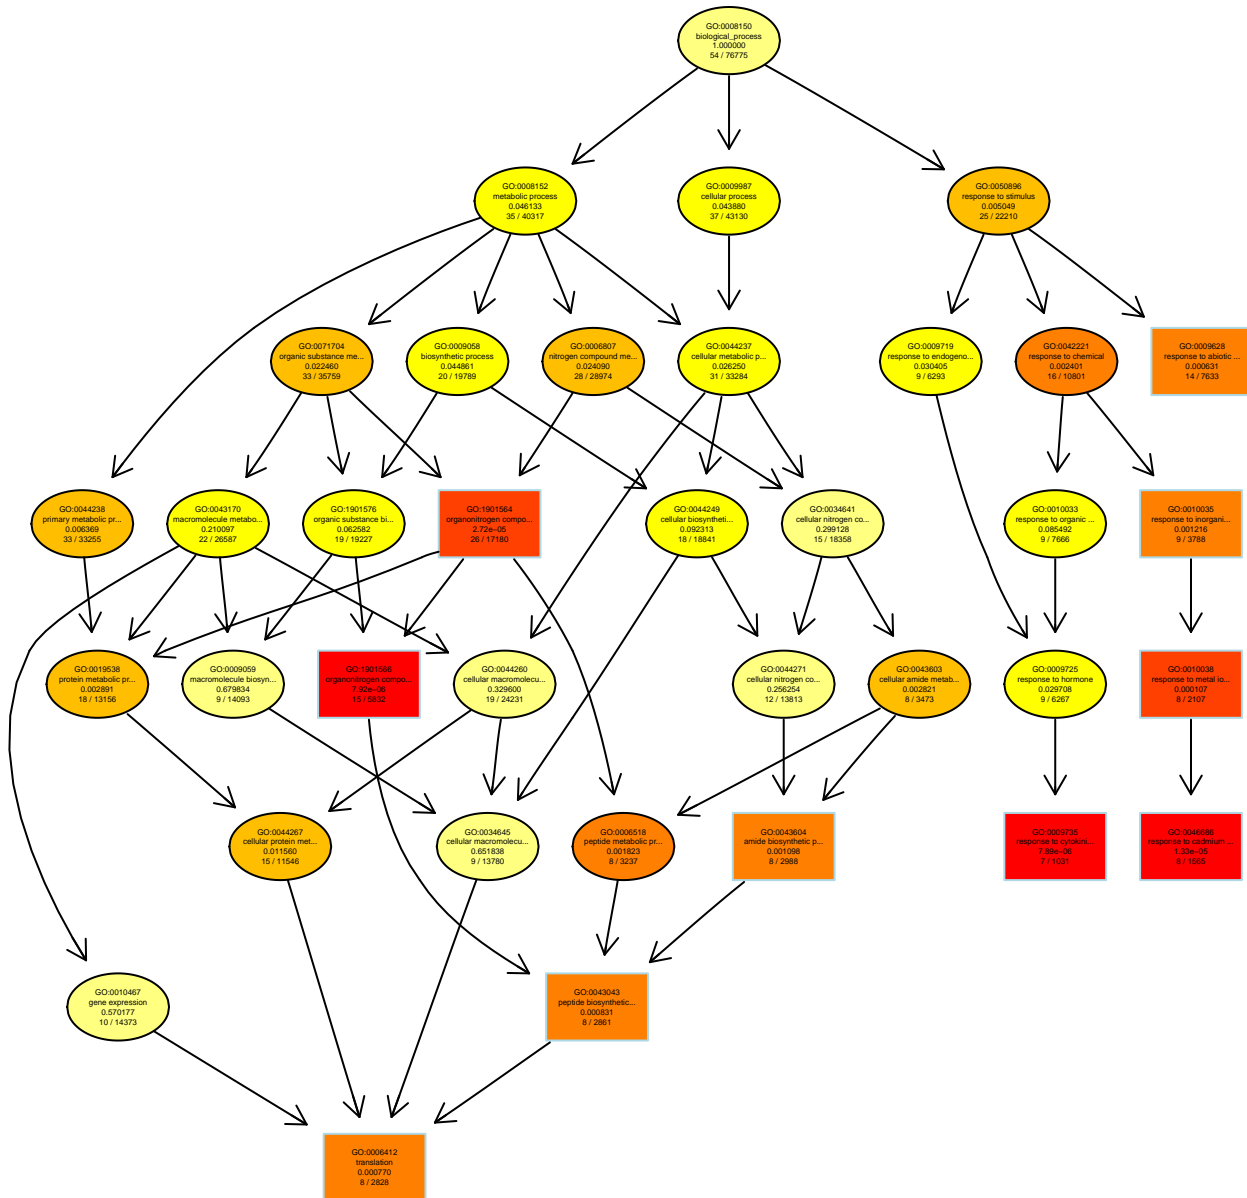

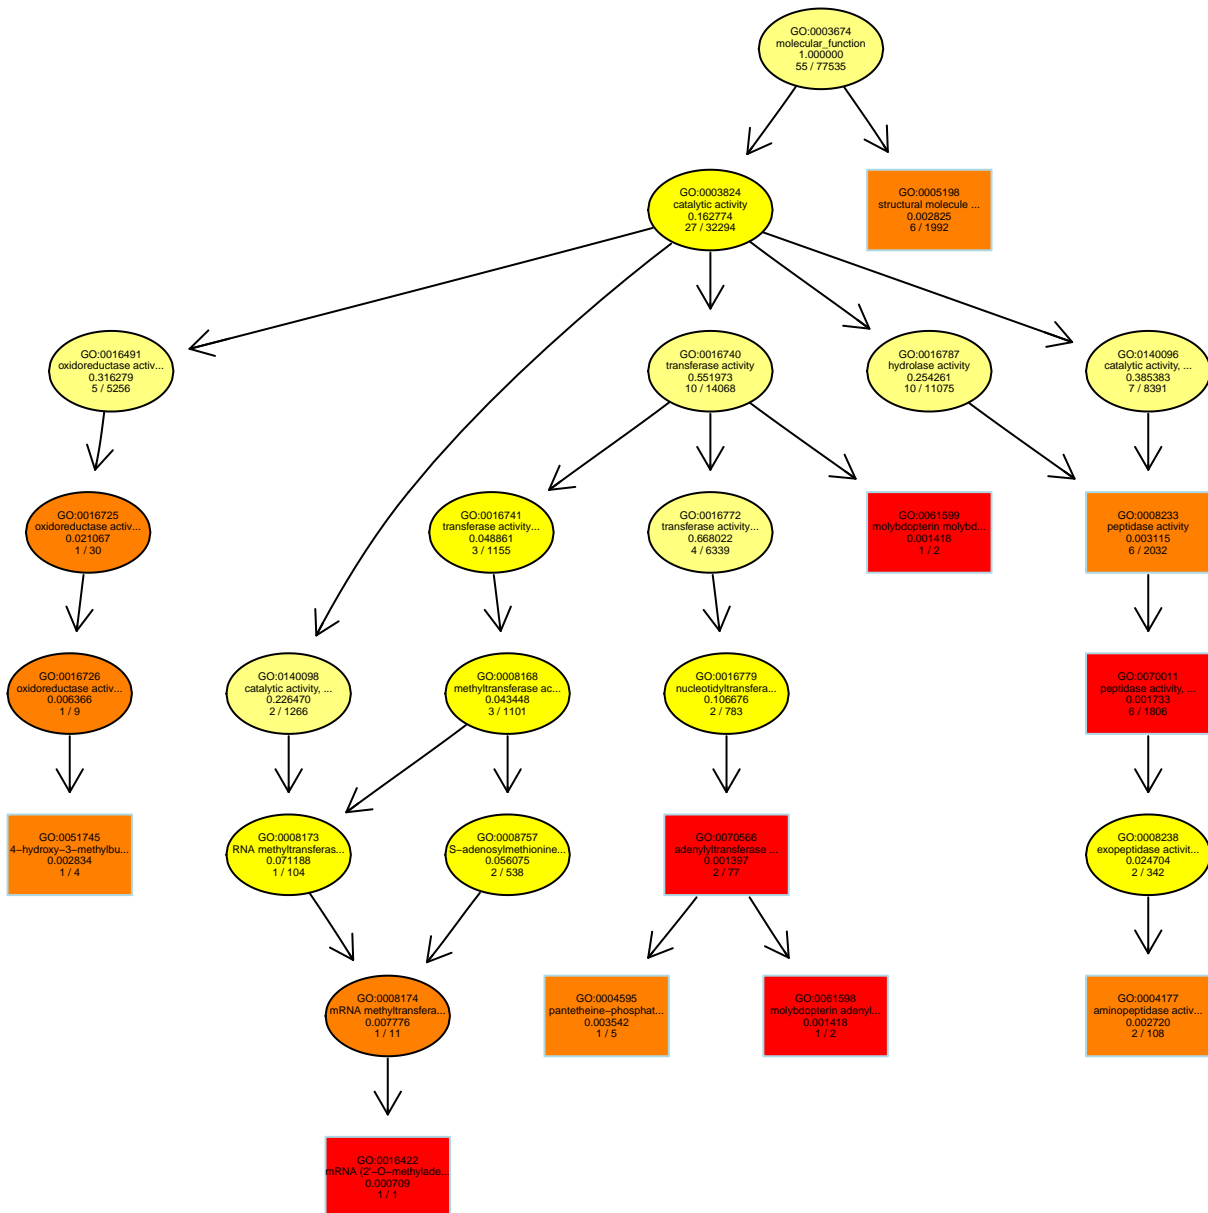

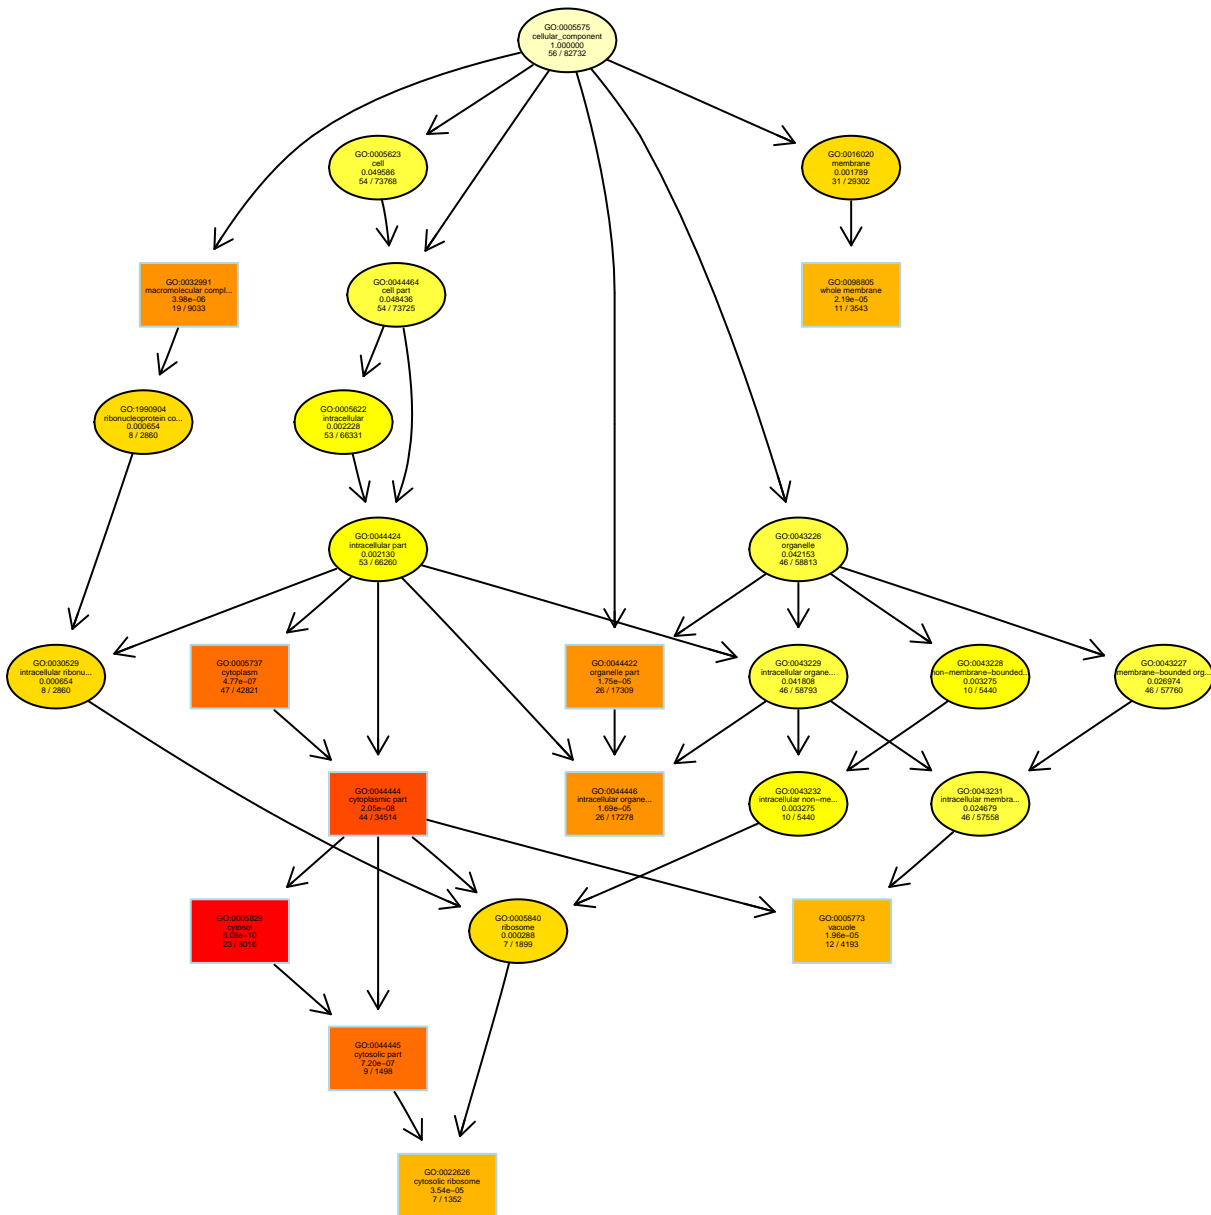

Supplement: s1 [file s1]

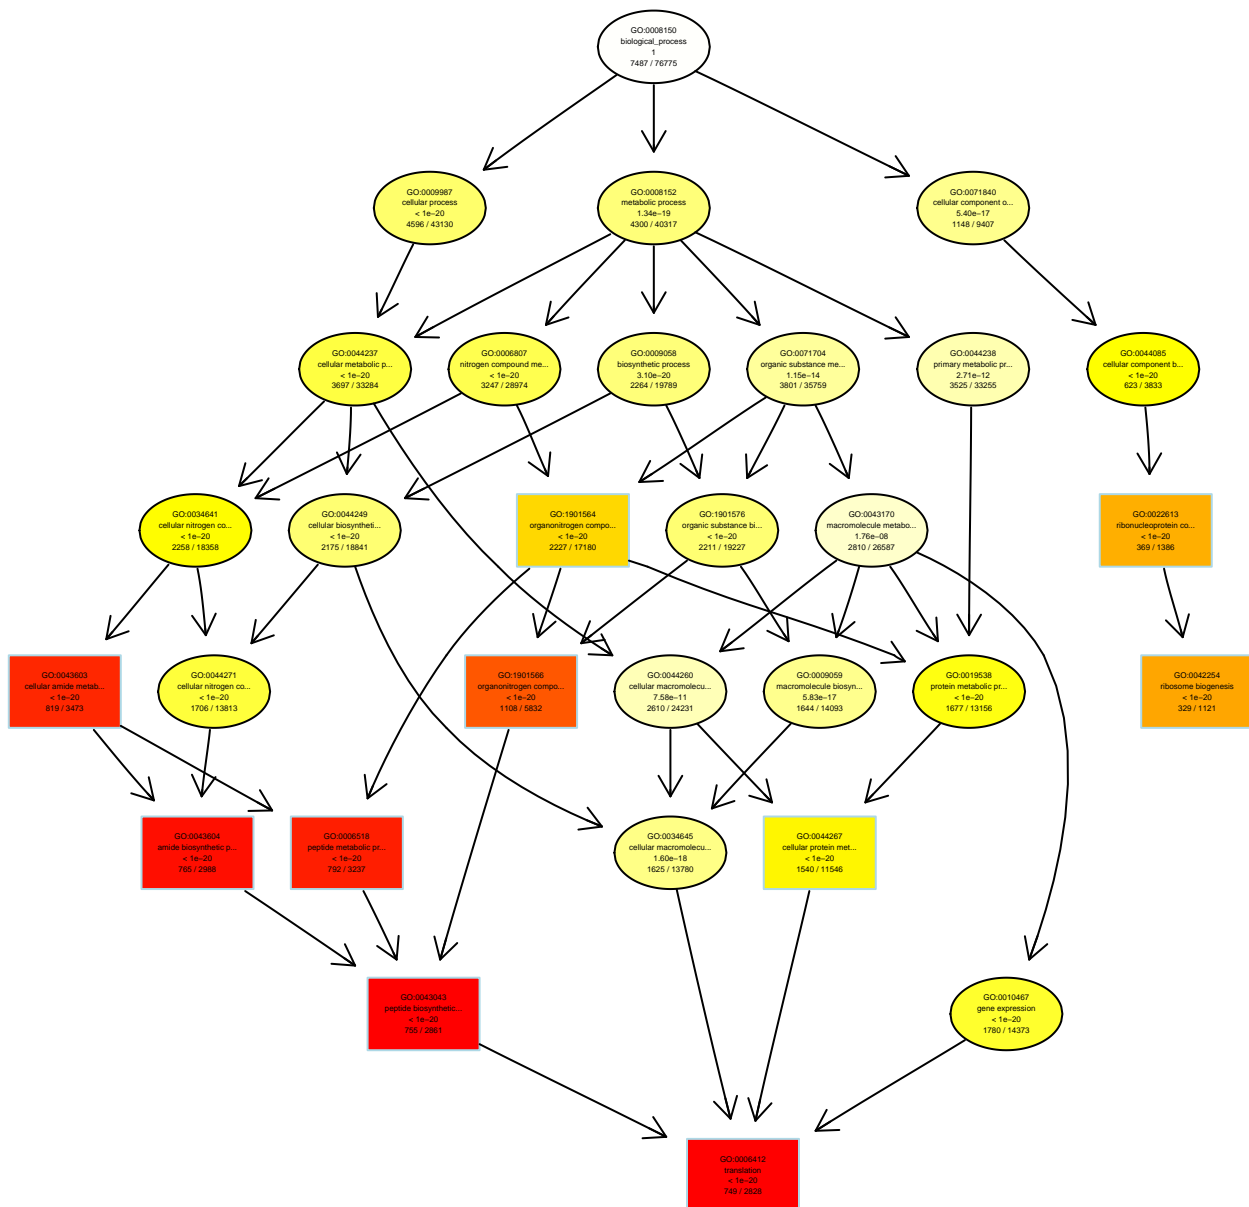

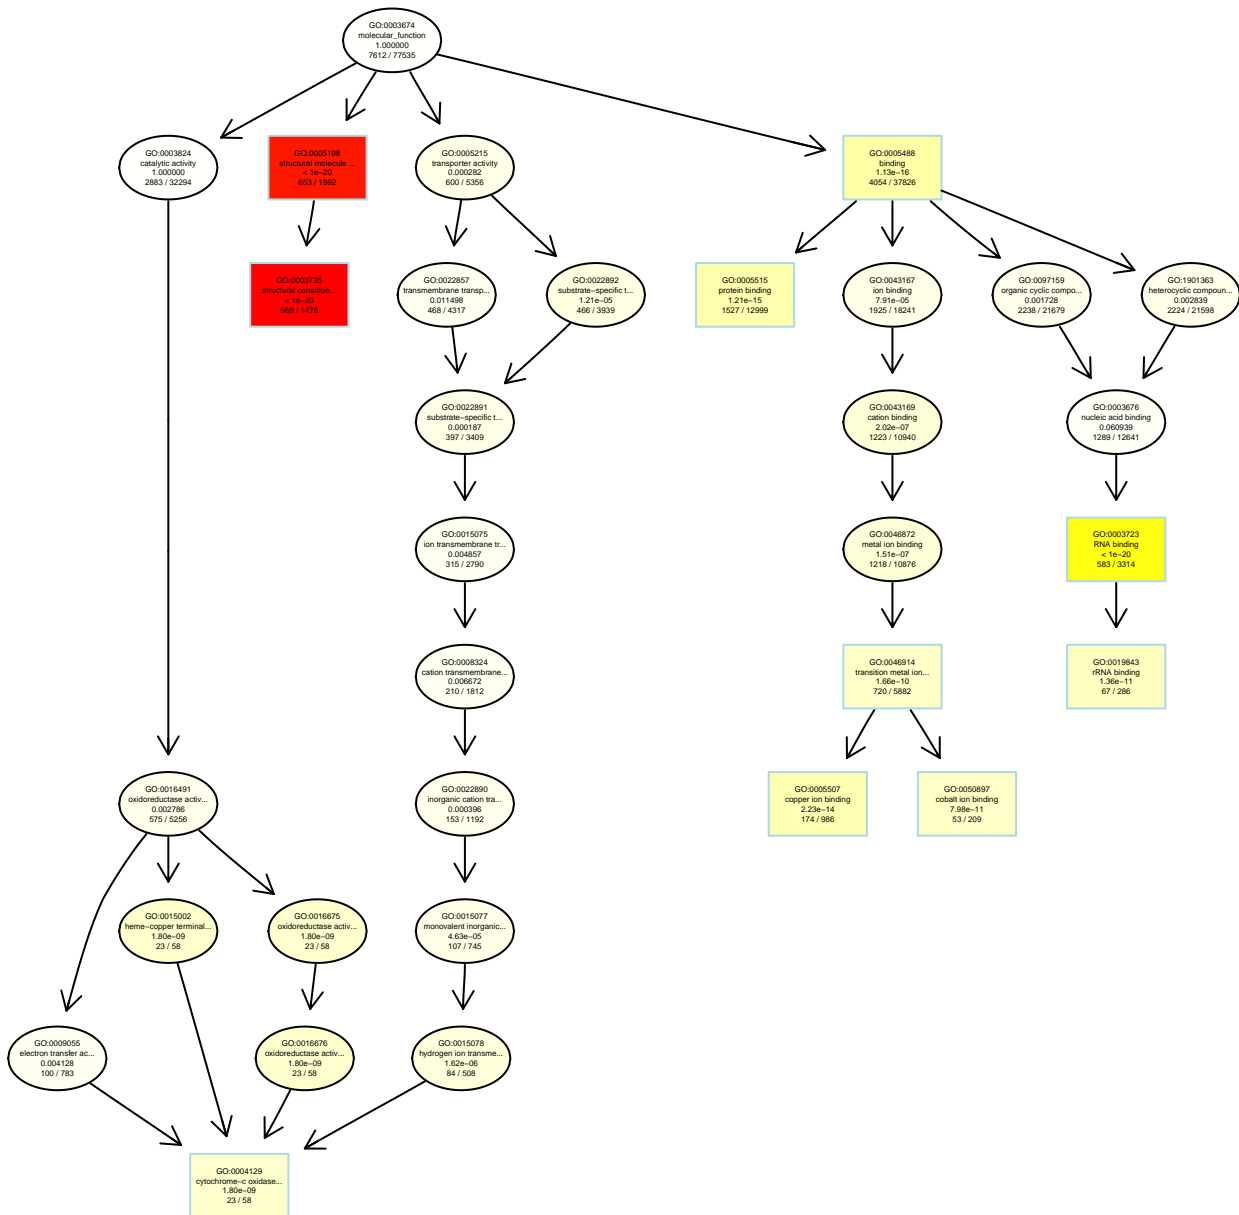

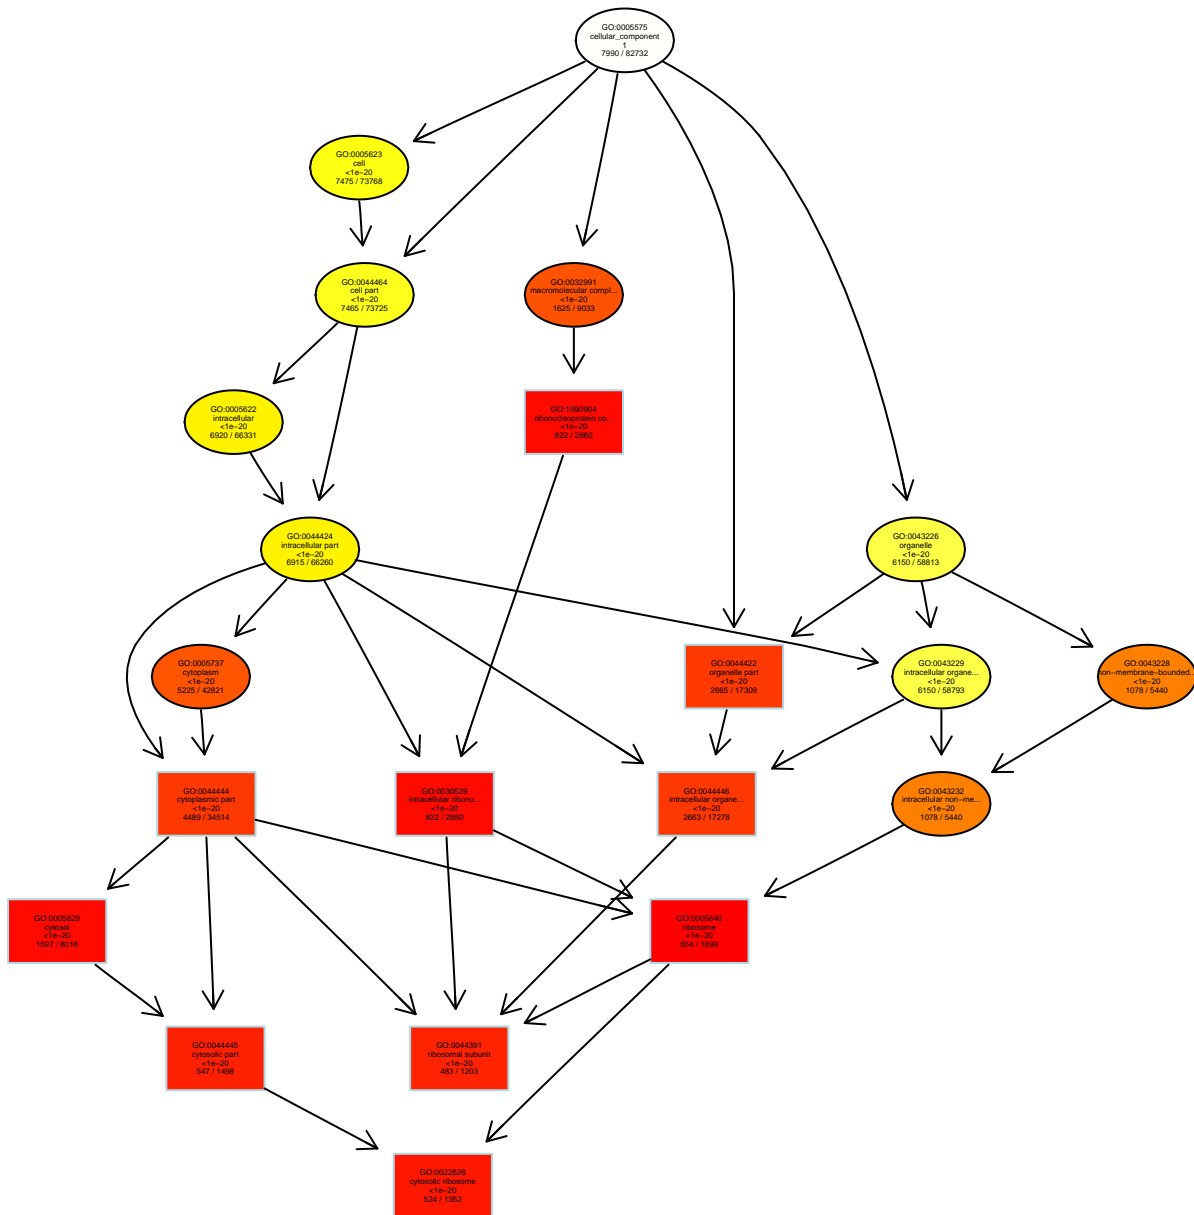

Supplement: s1 [file s1]

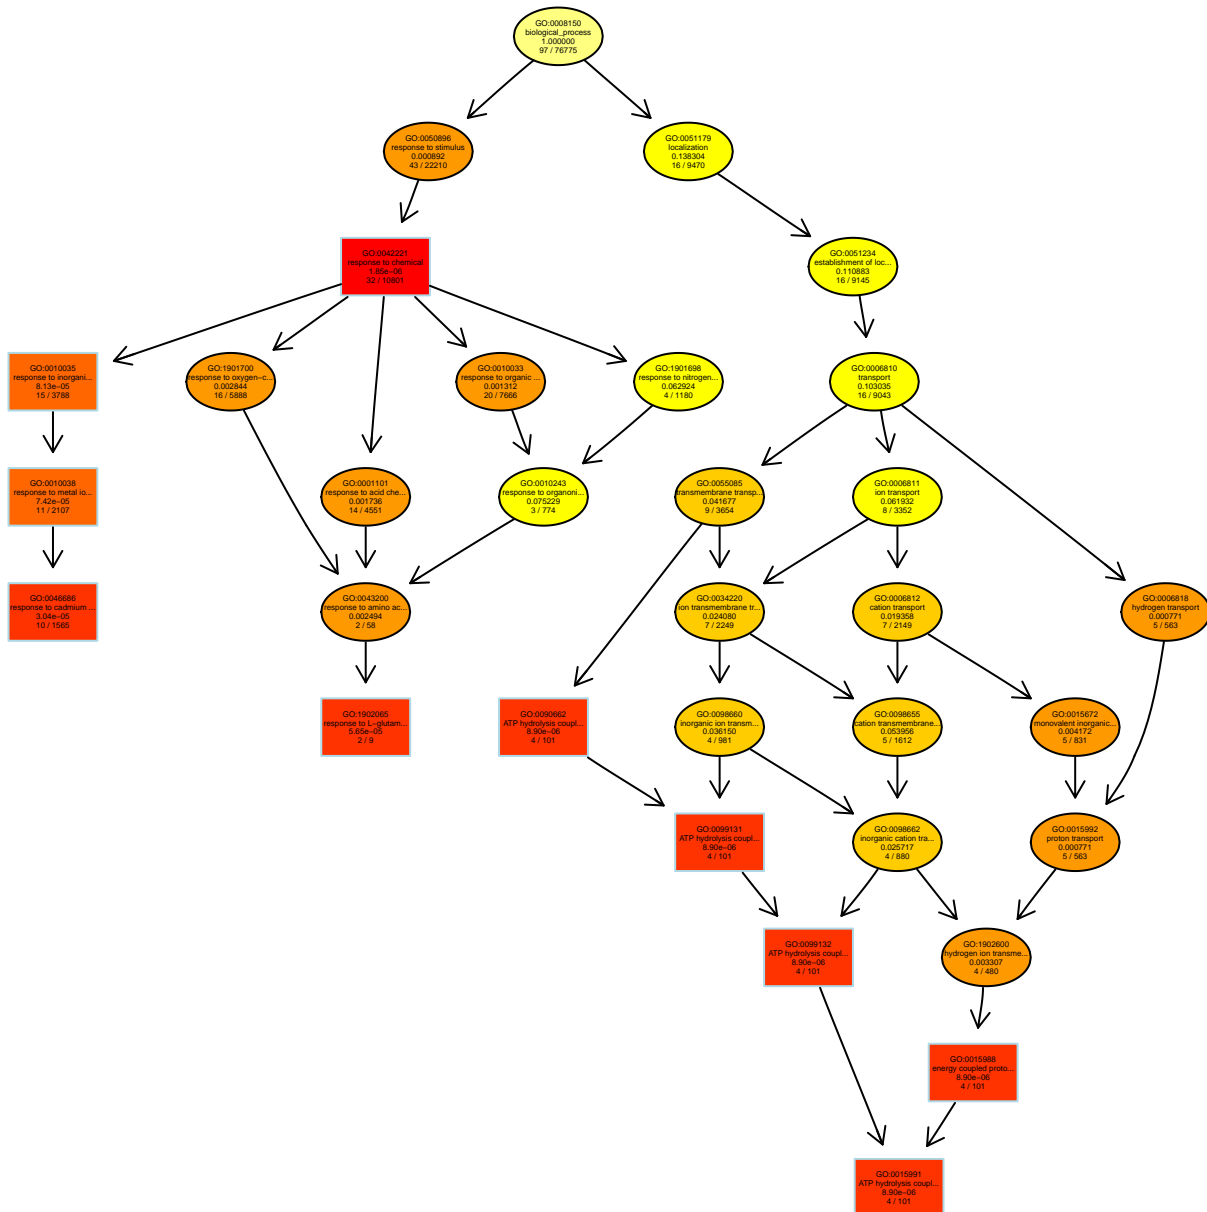



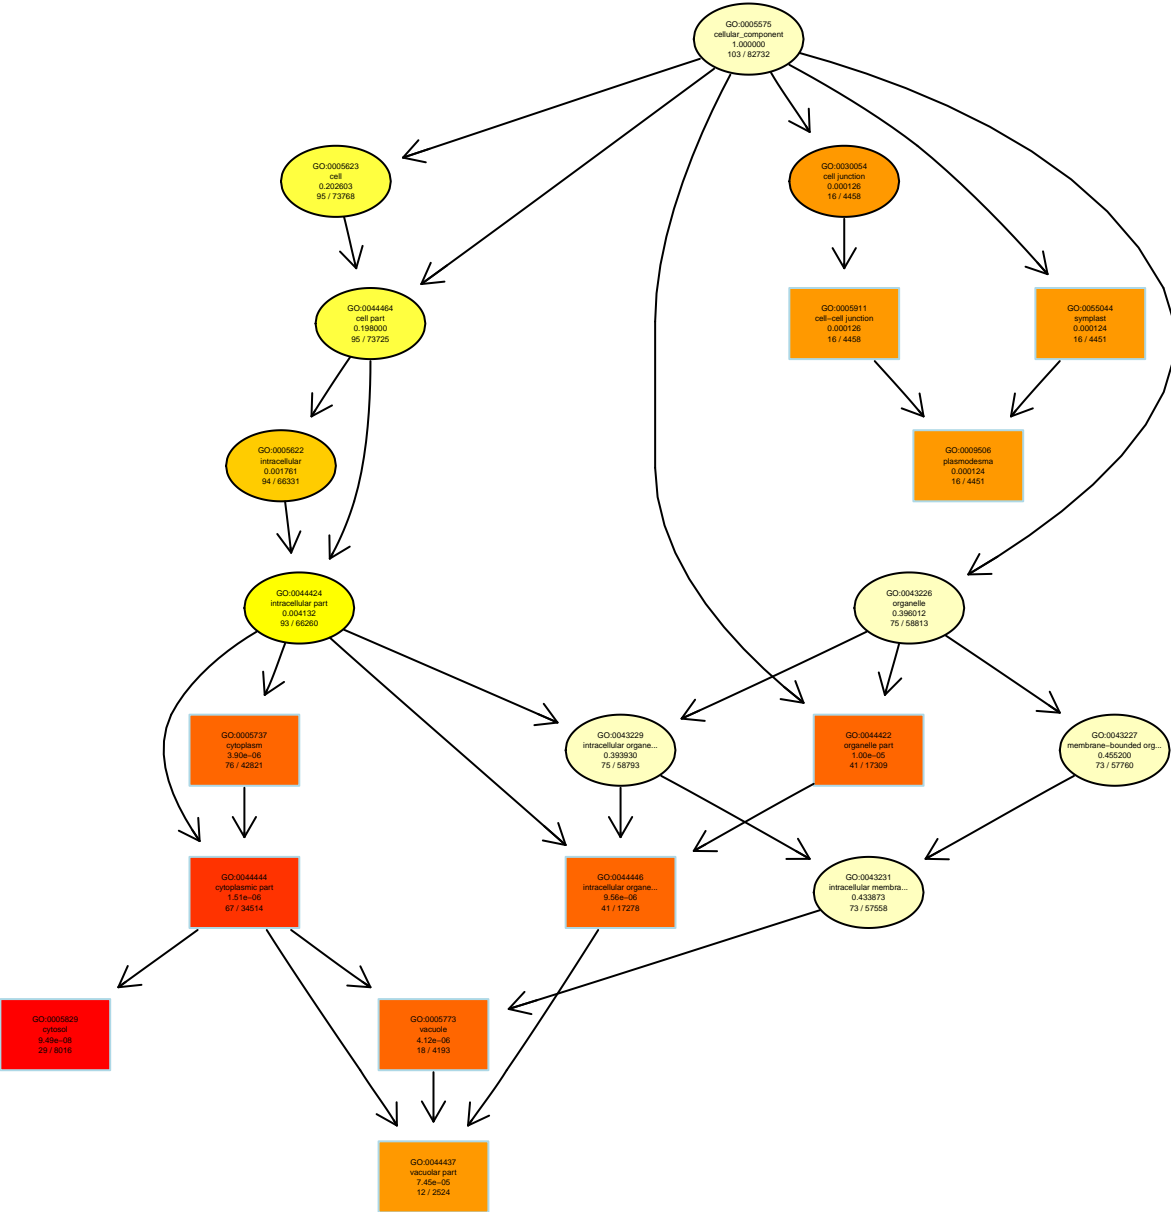

Supplement: s1 [file s1]

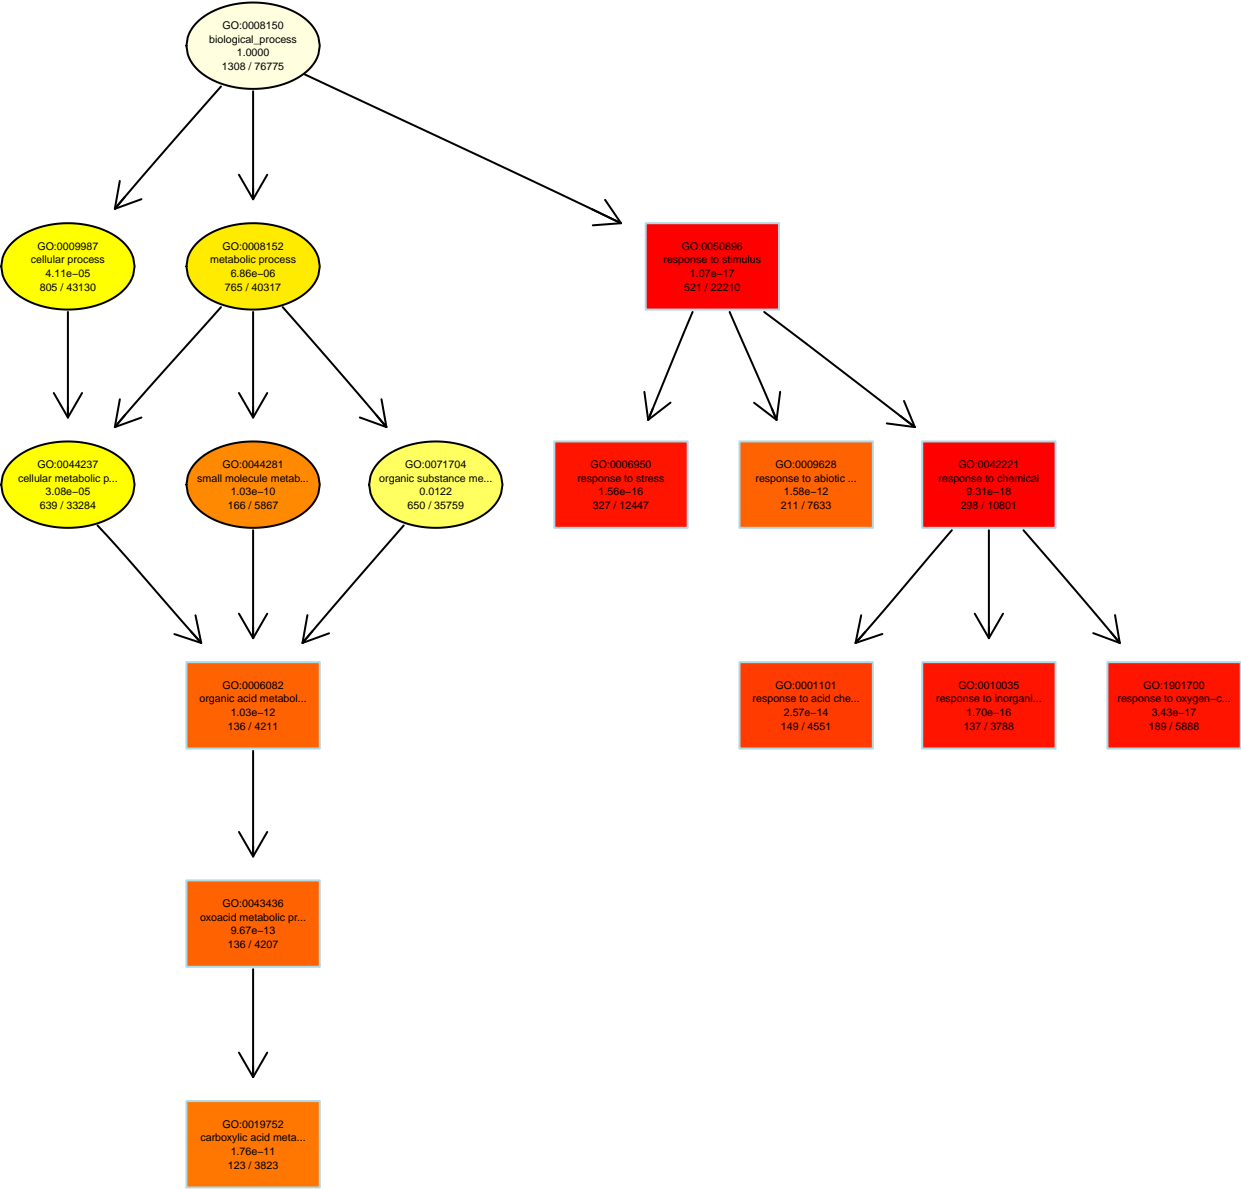

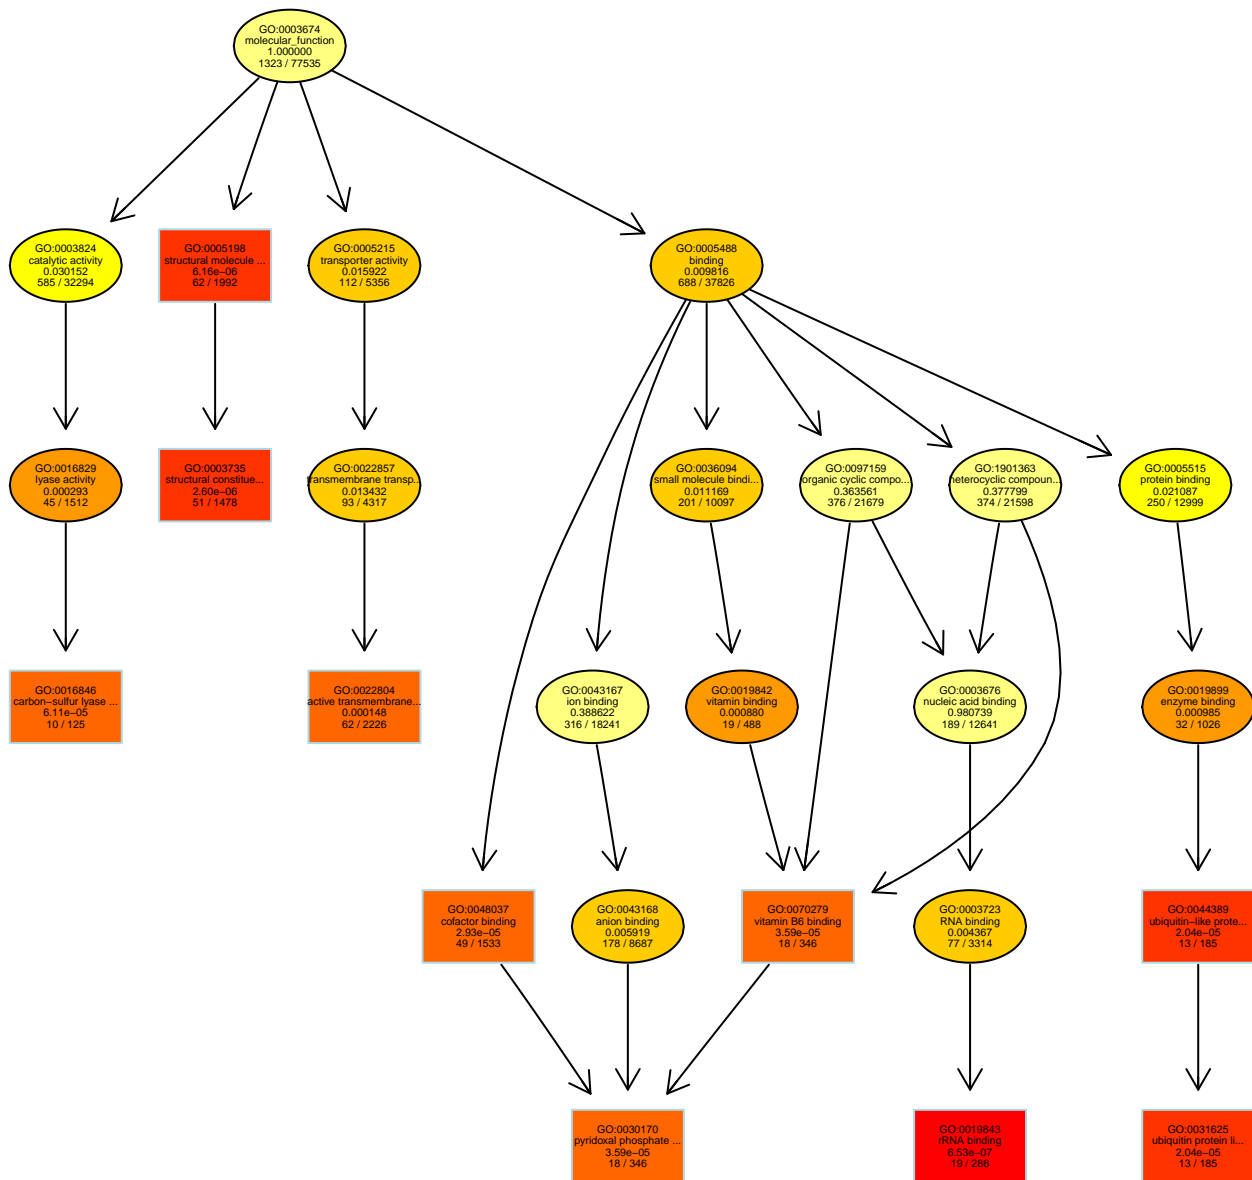

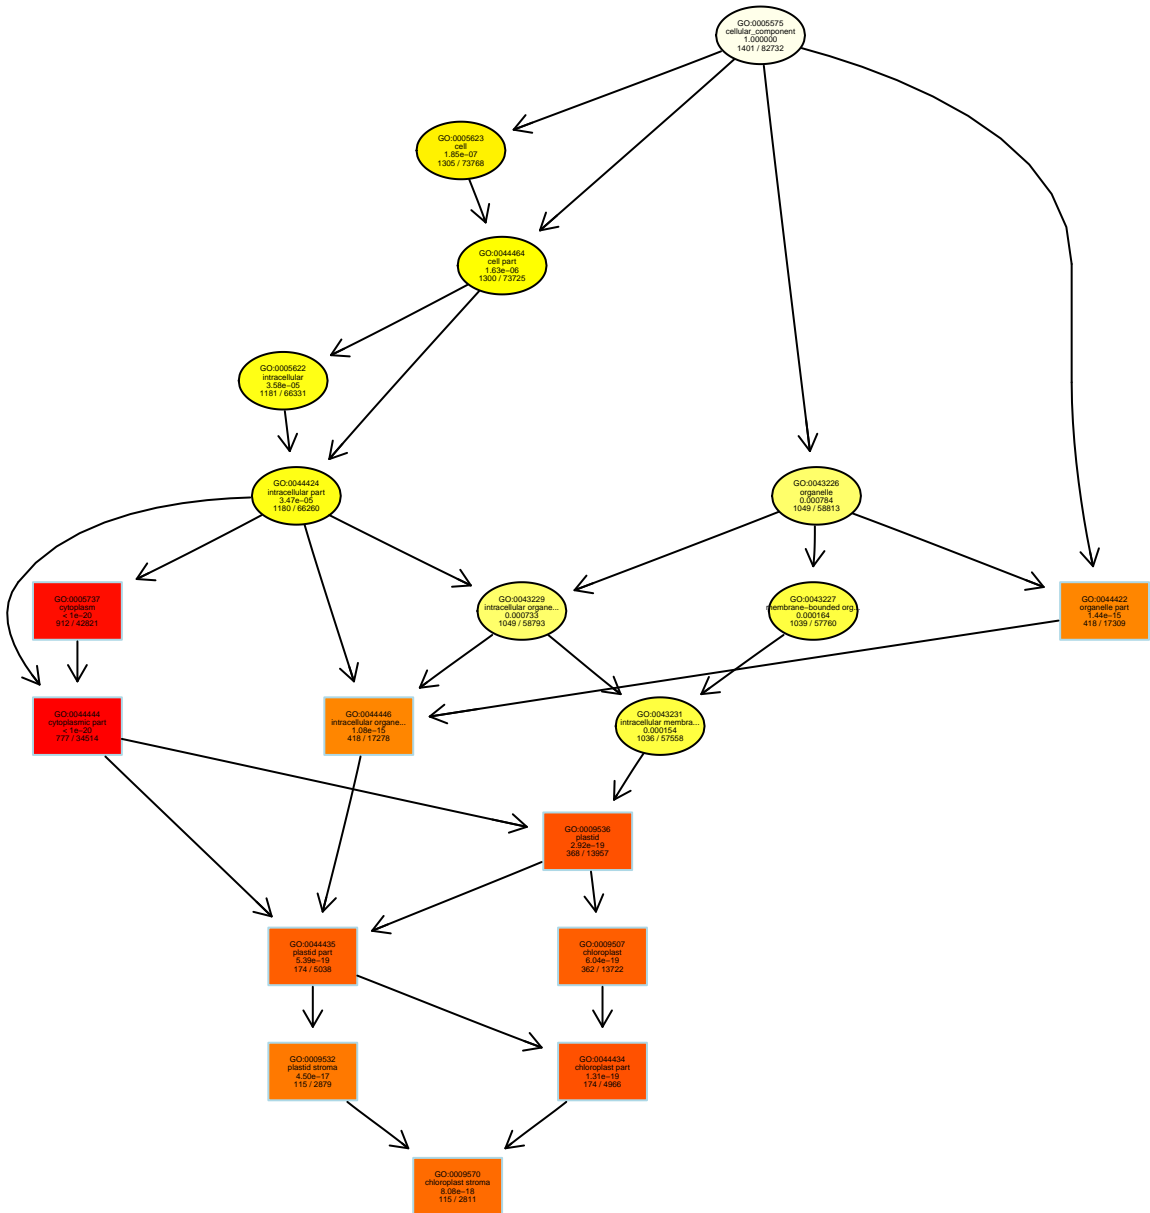

Supplement: s1 [file s1]

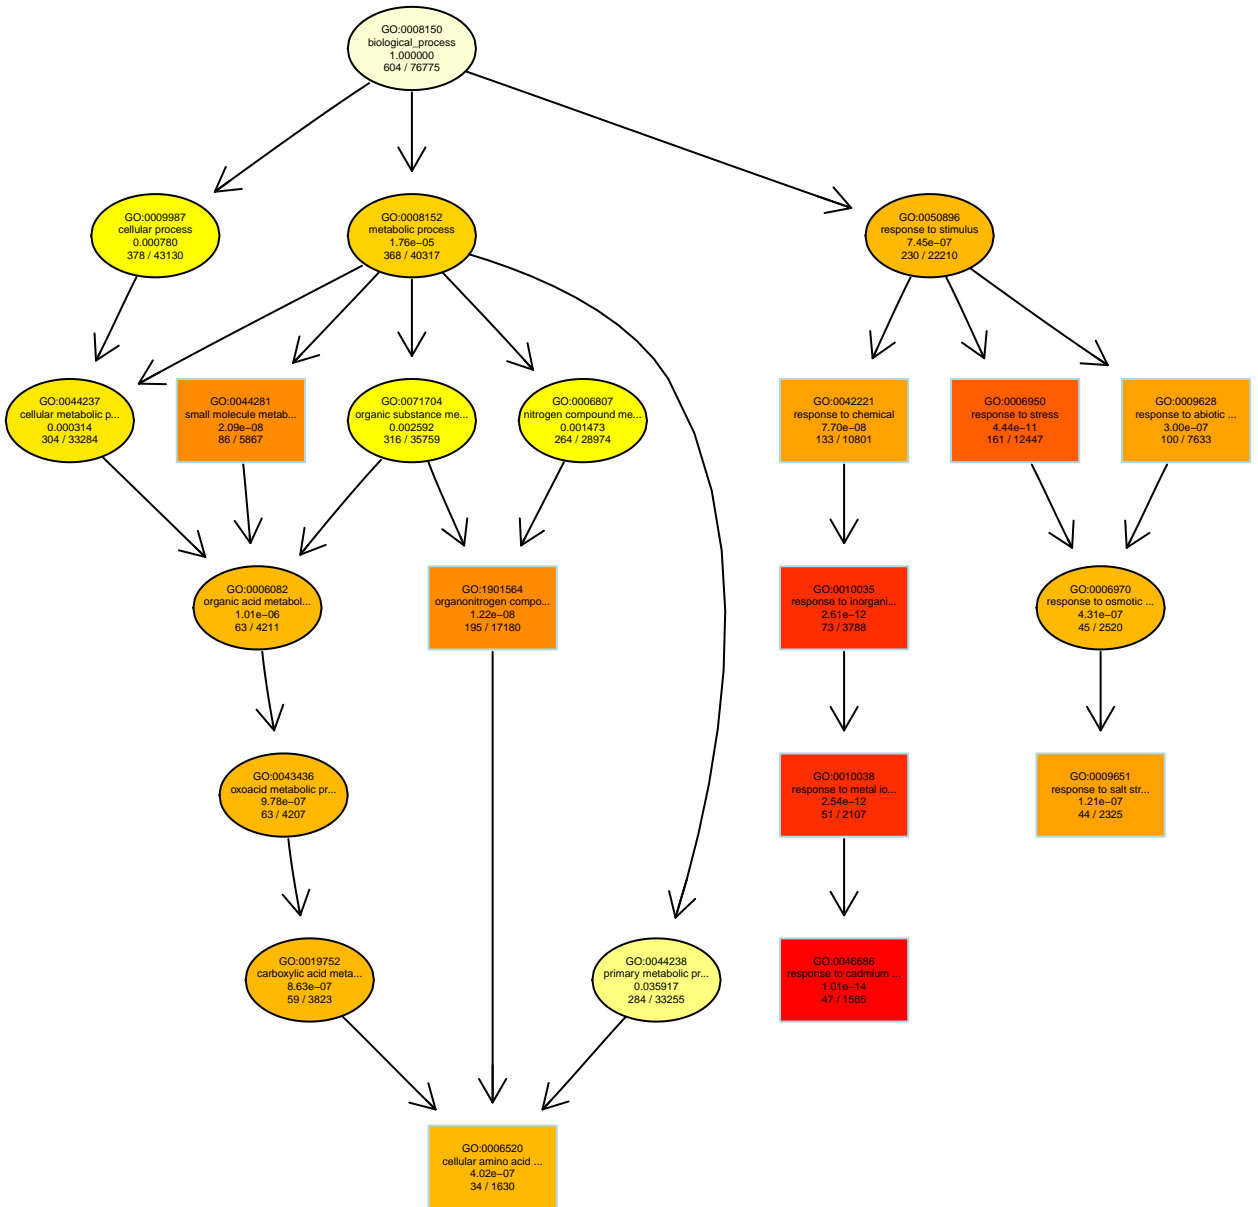

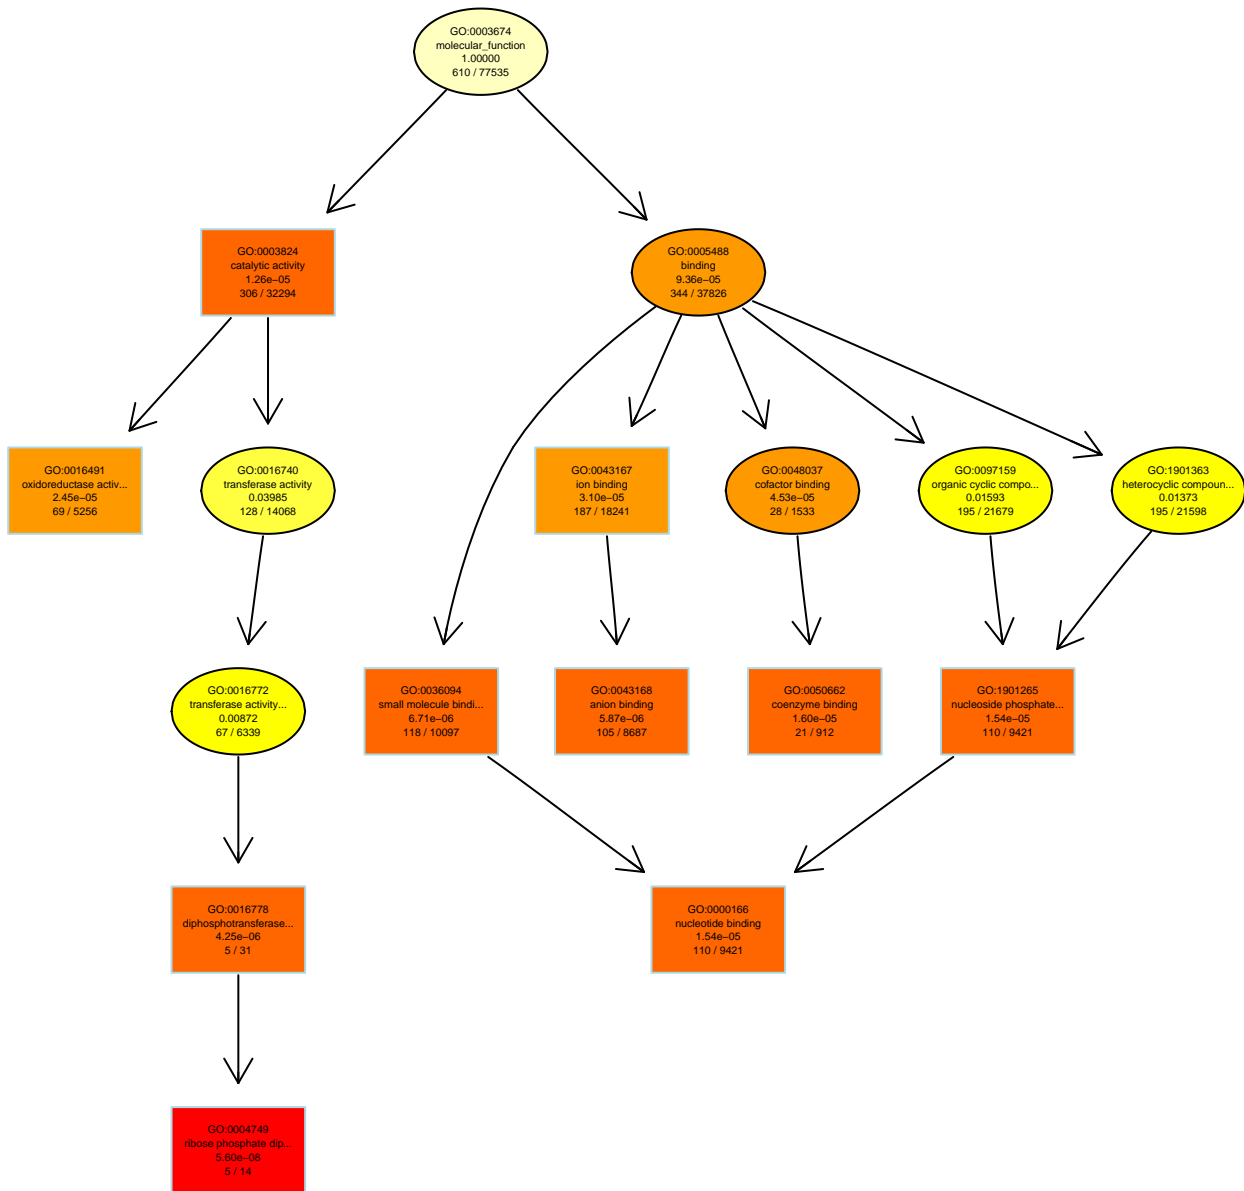

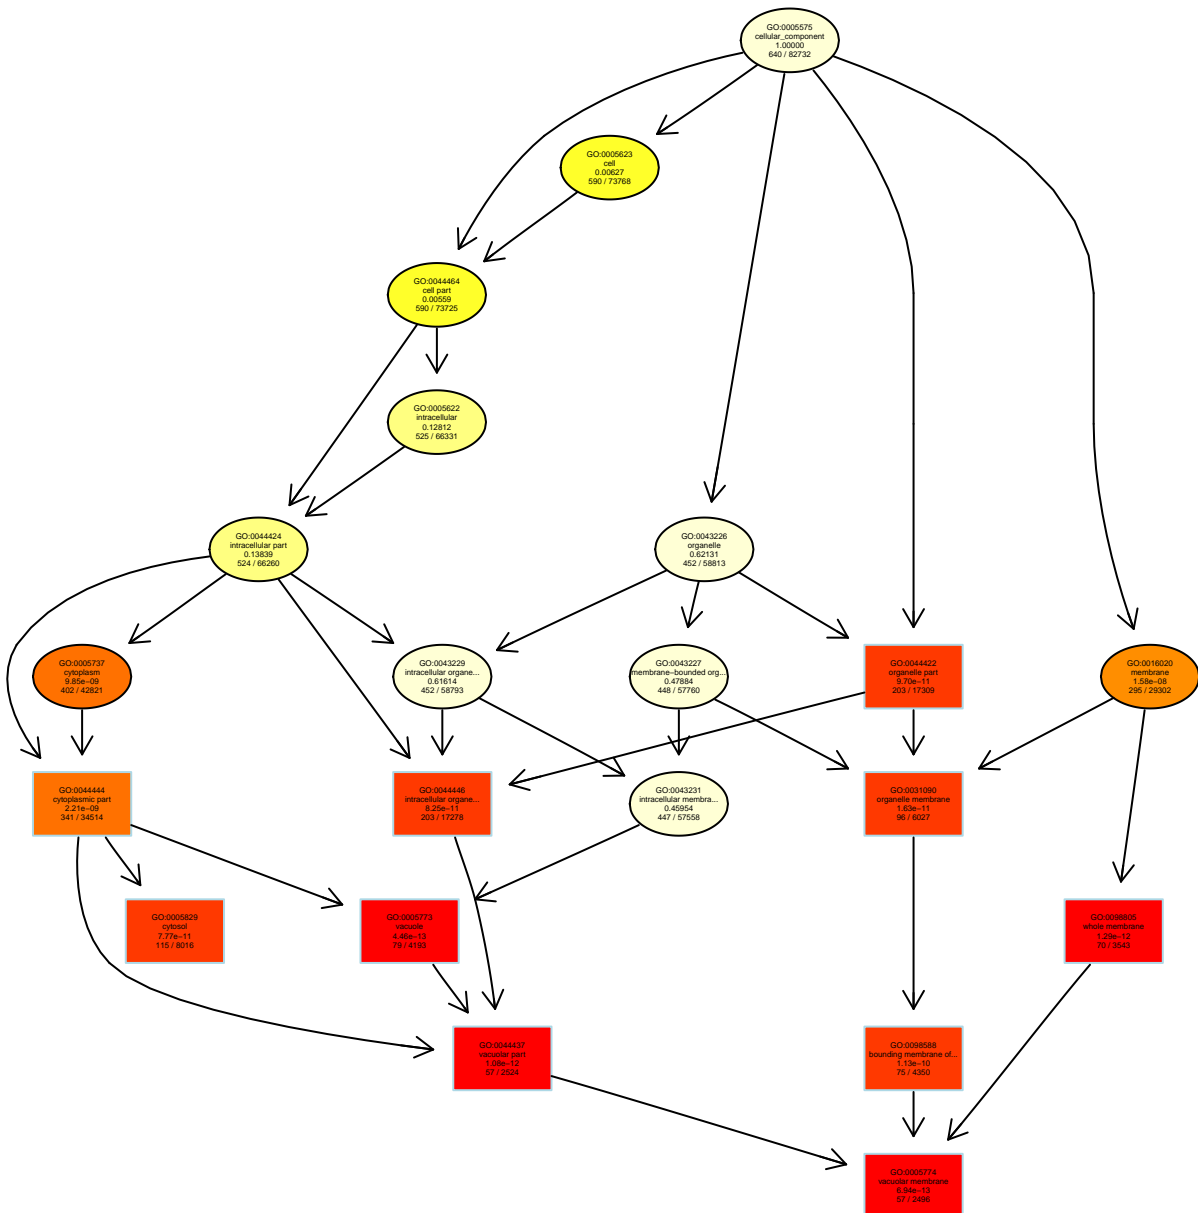

Supplement: s1 [file s1]
